# Supplementary material
Source: Research Square preprint supplement (doi:10.21203/rs.3.rs-9075517/v1)

**Figure 1B**

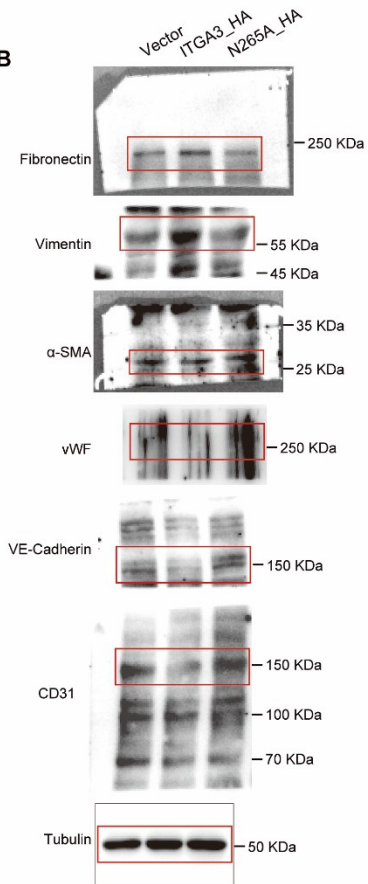

**Figure 1C**

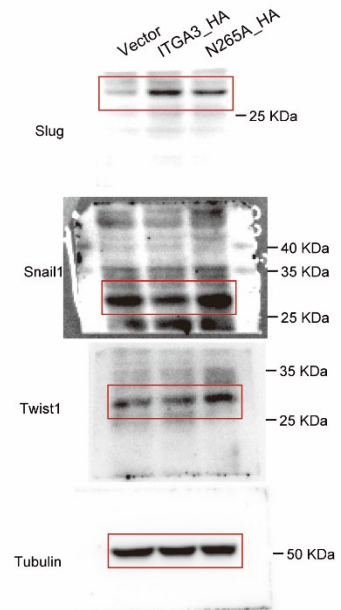

**Figure 2C**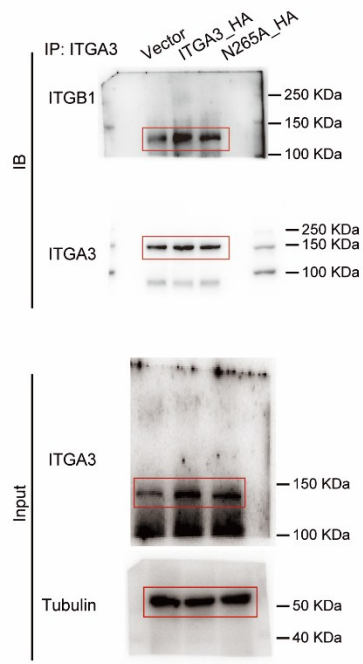**Figure 2E**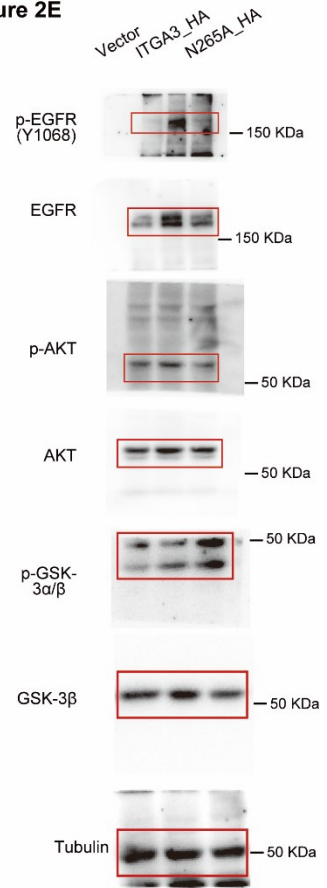**Figure 2G**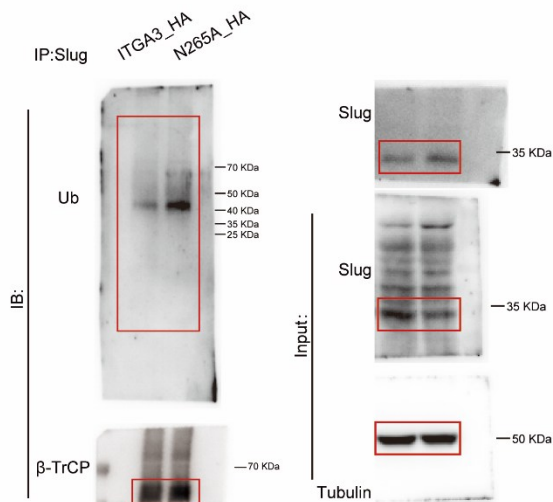**Figure 2F**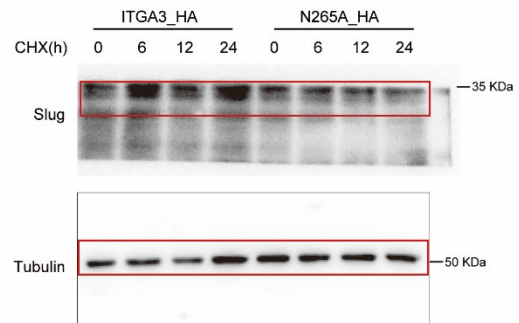

Figure 3F

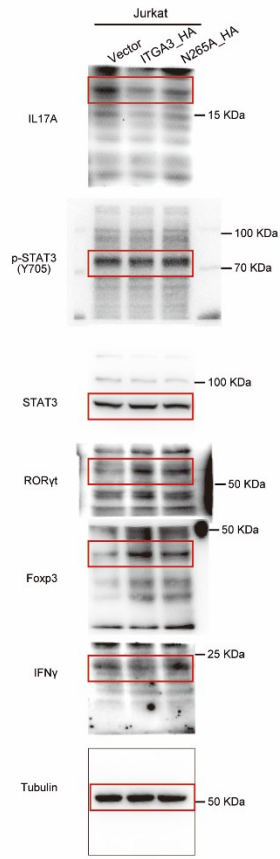

Figure 3I

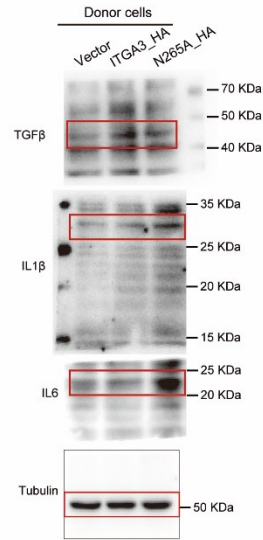

Figure 6D

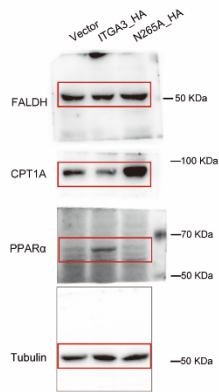

Figure 6H

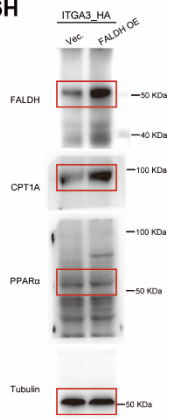

Figure 6I

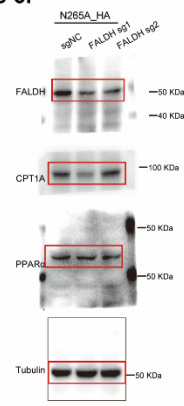

Figure 7a

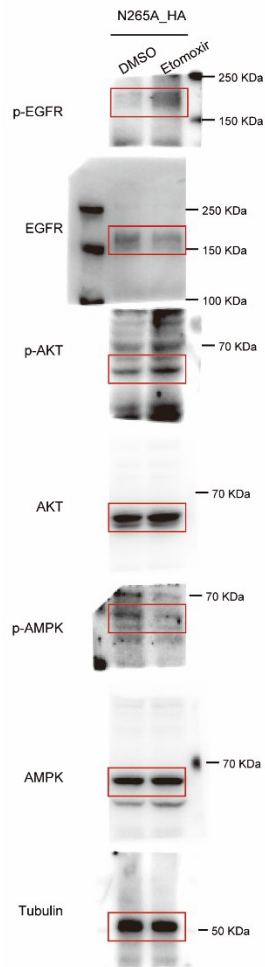

Figure 7b

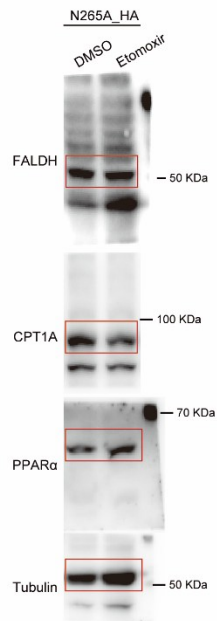

Figure 7c

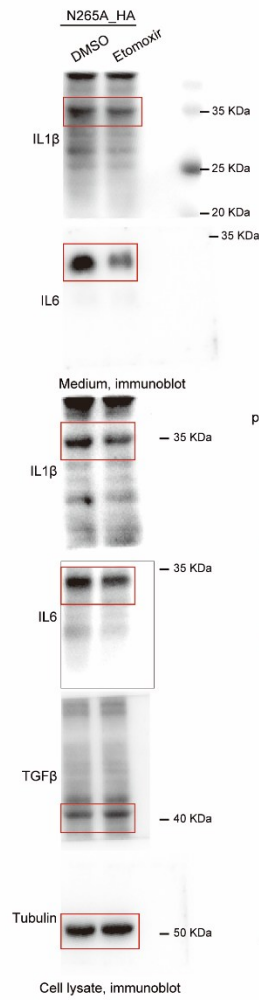

Figure 7E

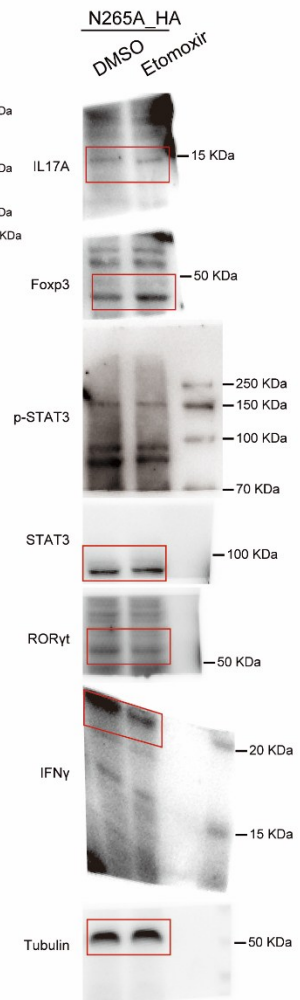

Figure 7I

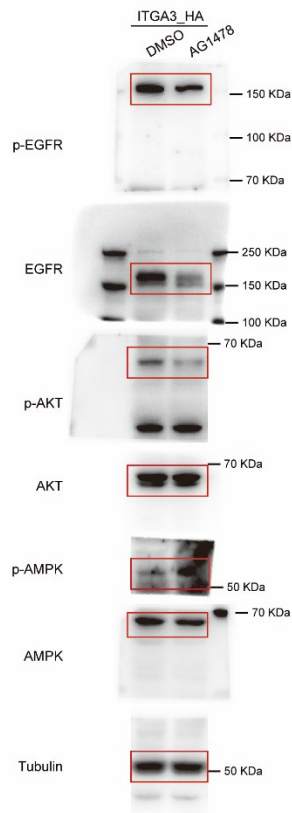

Figure 7J

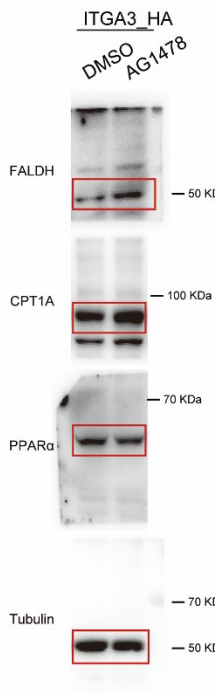

Figure 7K

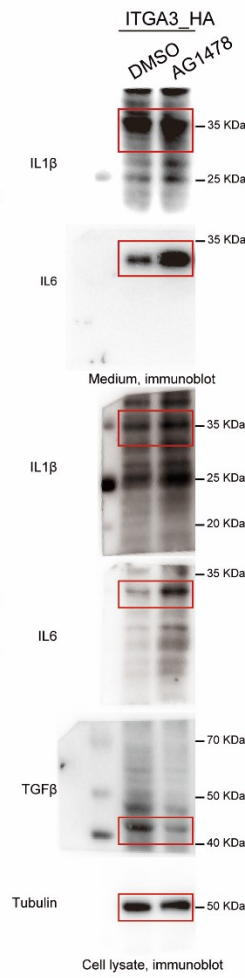

Figure 7M

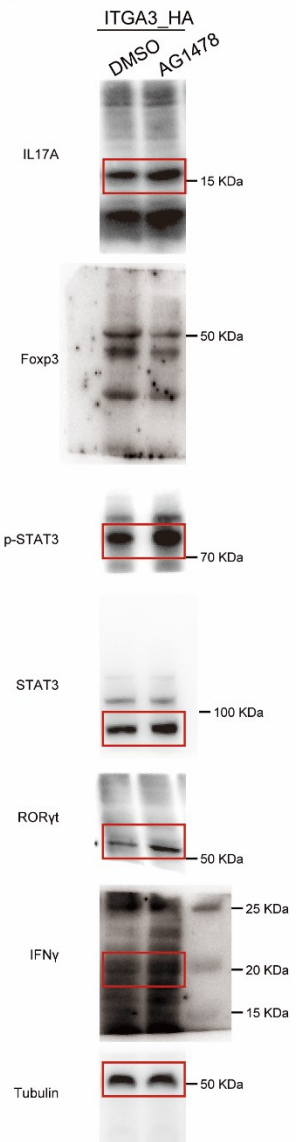

Figure S1B

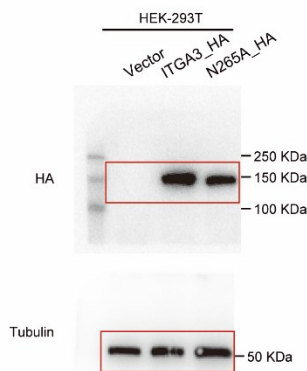

Figure S3A

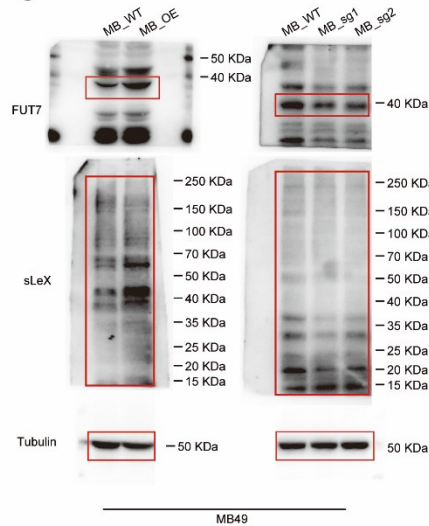

MB49

Figure S5B

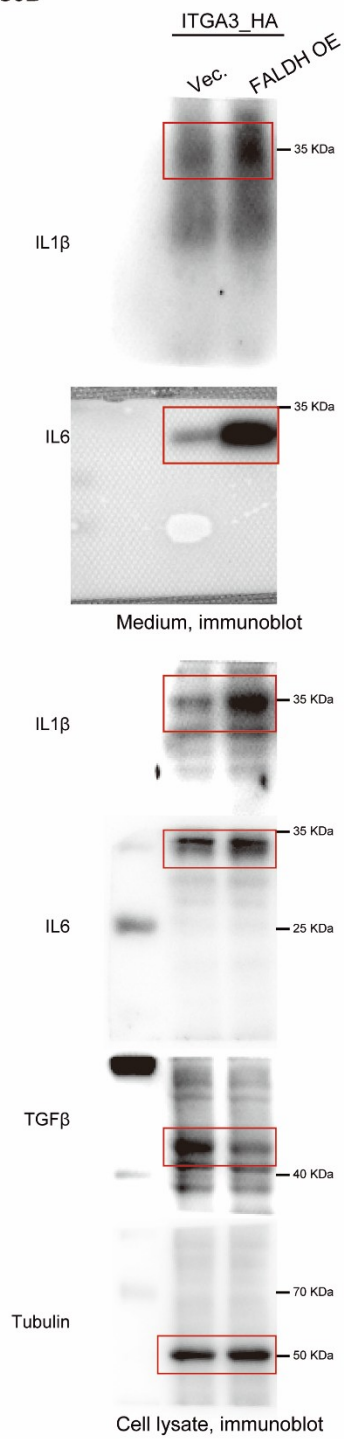

Figure S5E

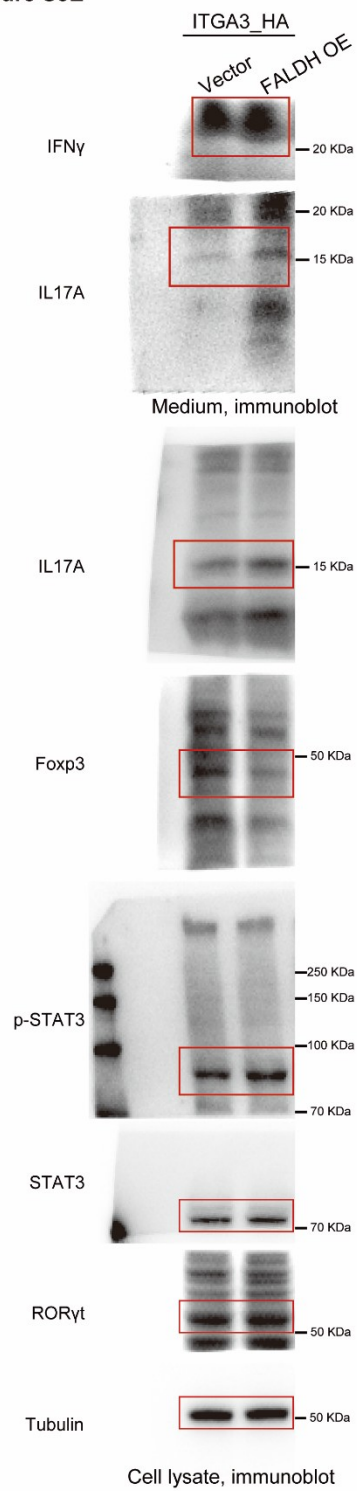

Figure S5I

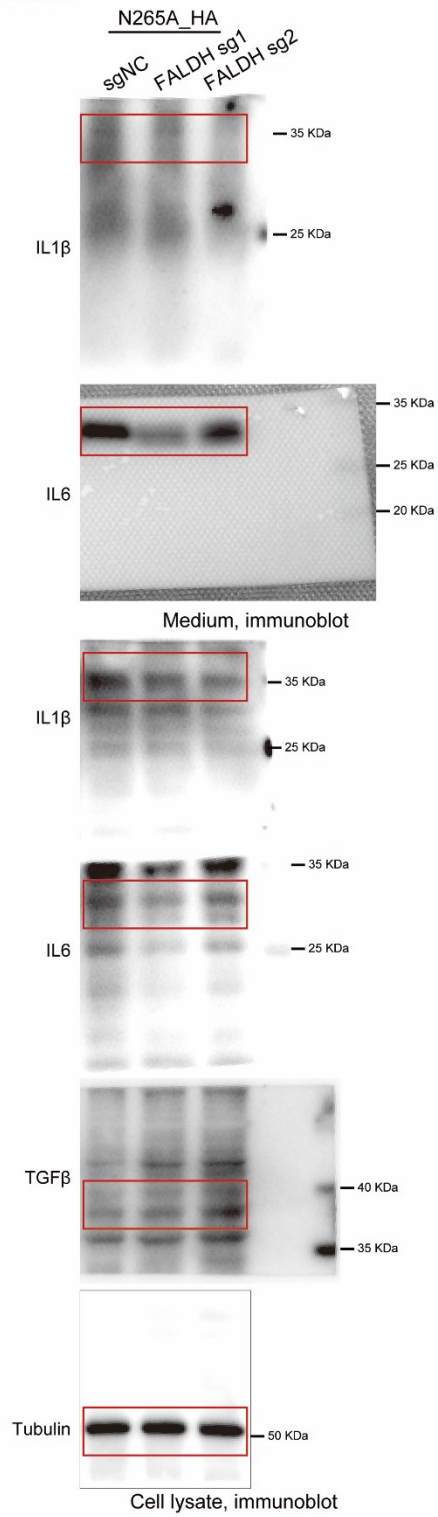

Figure S5J

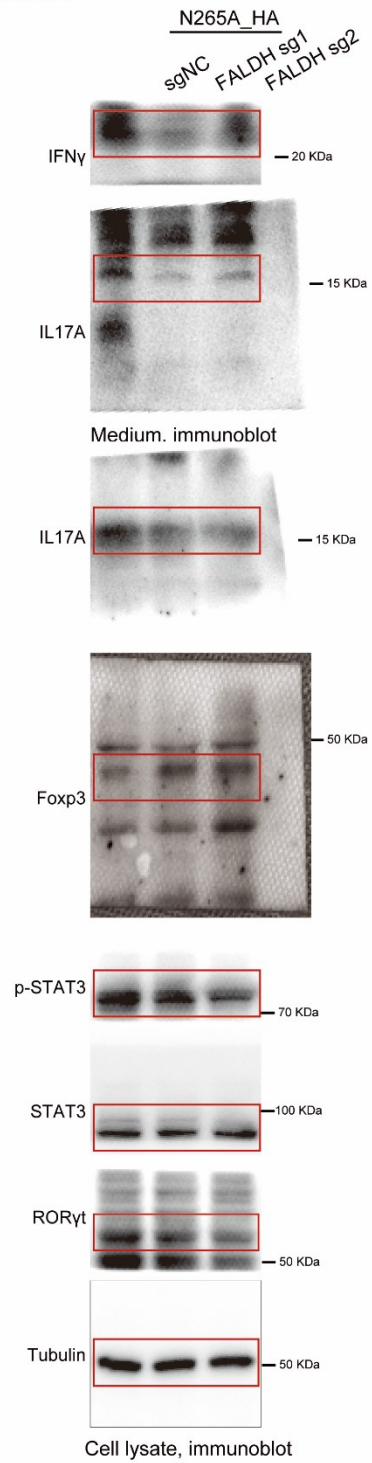

Figure S6A

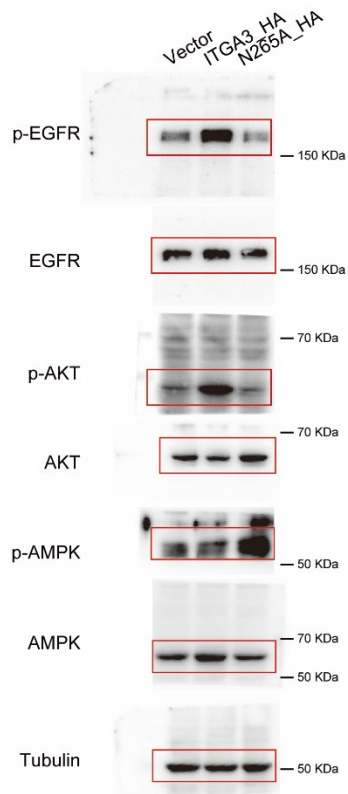

Figure S6B

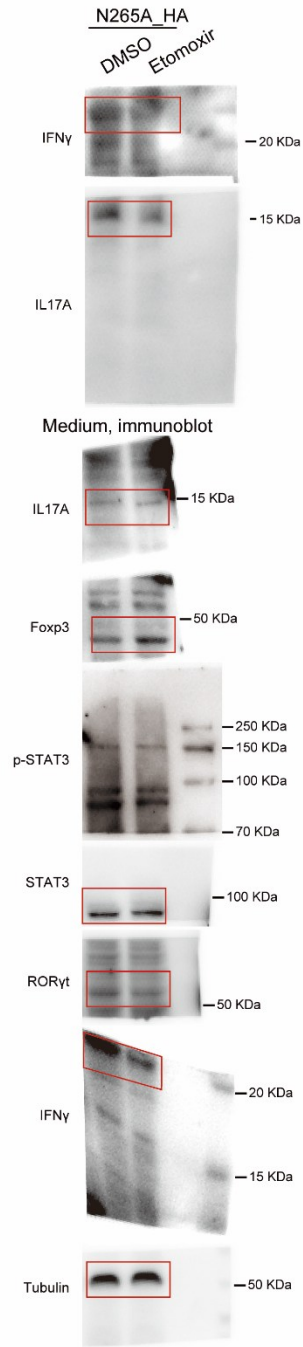

Figure S6C

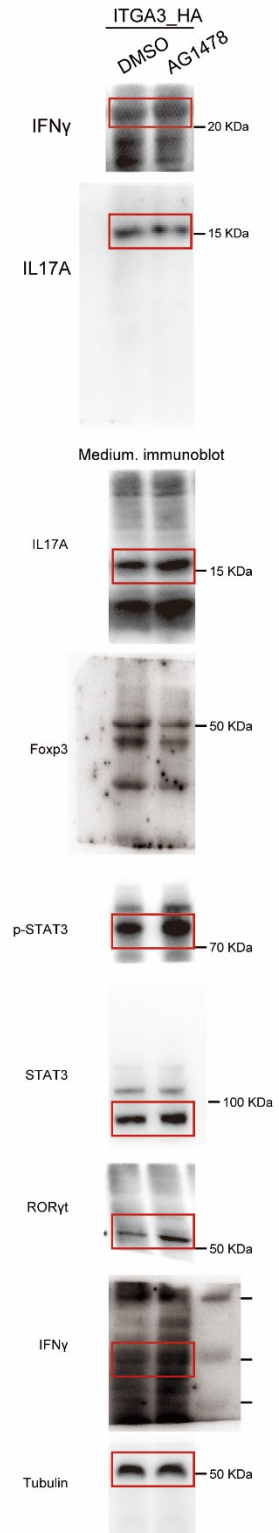

Figure S6D

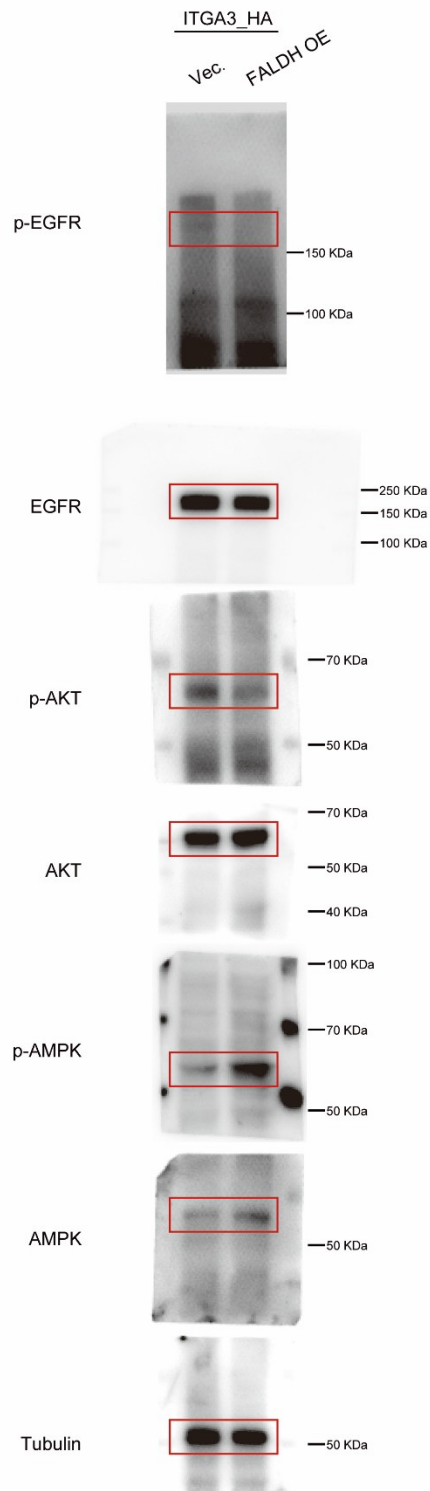

Figure S6E

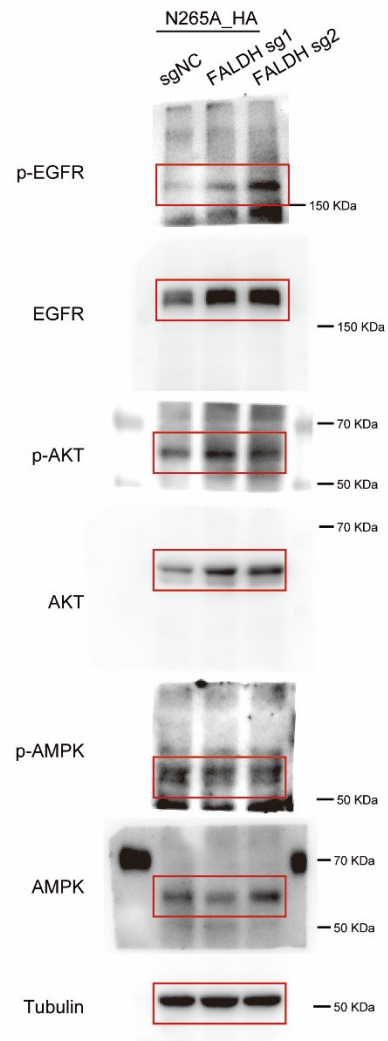

Supplement: Supplementary file 2 [file 128e2b7c41ea9baf00478721.pdf]
