# Supplementary material
Source: Research Square preprint supplement (doi:10.21203/rs.3.rs-9075517/v1)
Supplement: Supplementary file 1 [file 03d823e2b4d580e2eefe22bd.docx]

**Endothelial Sialyl Lewis X-Modified Integrin α3 Drives Fatty Acid Metabolic Reprogramming to Shape Th17 Plasticity in Bladder Cancer**

Hui Feng1, Huina Zhang, Feng Guan1,*

1 Key Laboratory of Resource Biology and Biotechnology in Western China, Ministry of Education, Provincial Key Laboratory of Biotechnology, College of Life Sciences, Northwest University, Xi'an, China

***Correspondence to:** Feng Guan, E-mail: guanfeng@nwu.edu.cn. Tel: +86-29-88303534. Mailing address: College of Life Sciences, Northwest University, 229 Taibai North Road, Xi’an, Shaanxi, 710069, China.

**Supplementary Figures**

**
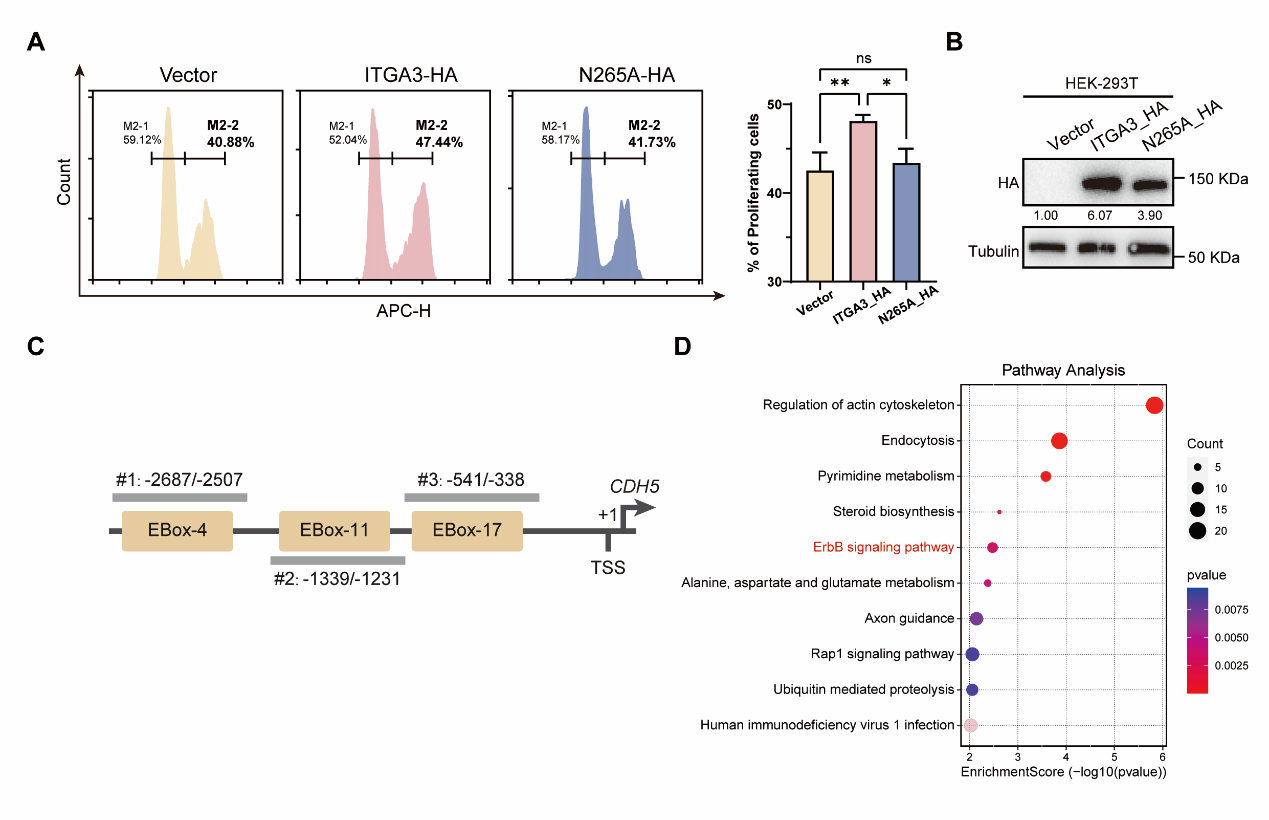
**

**Fig. S1 Functional validation of ITGA3 constructs and ChIP-qPCR primer design.** **(A)** The proliferation ability of Vector Vs. ITGA3_HA Vs. N265A_HA was examined by EdU assay. **(B)** Immunoblotting of full-length ITGA3-HA and N265A-HA expression in HEK 293T cells. **(C)** Schematic representation of ChIP-qPCR primer on E-Box motifs within the *CDH5* promoter. **(D)** KEGG pathway analysis for upregulated proteins in KK47 cells overexpressing *FUT7* versus control vector. Data represent means ± SEM from three independent experiments. Statistical significance was assessed by two-tailed Student’s t test (*p < 0.05, **p < 0.01).

**
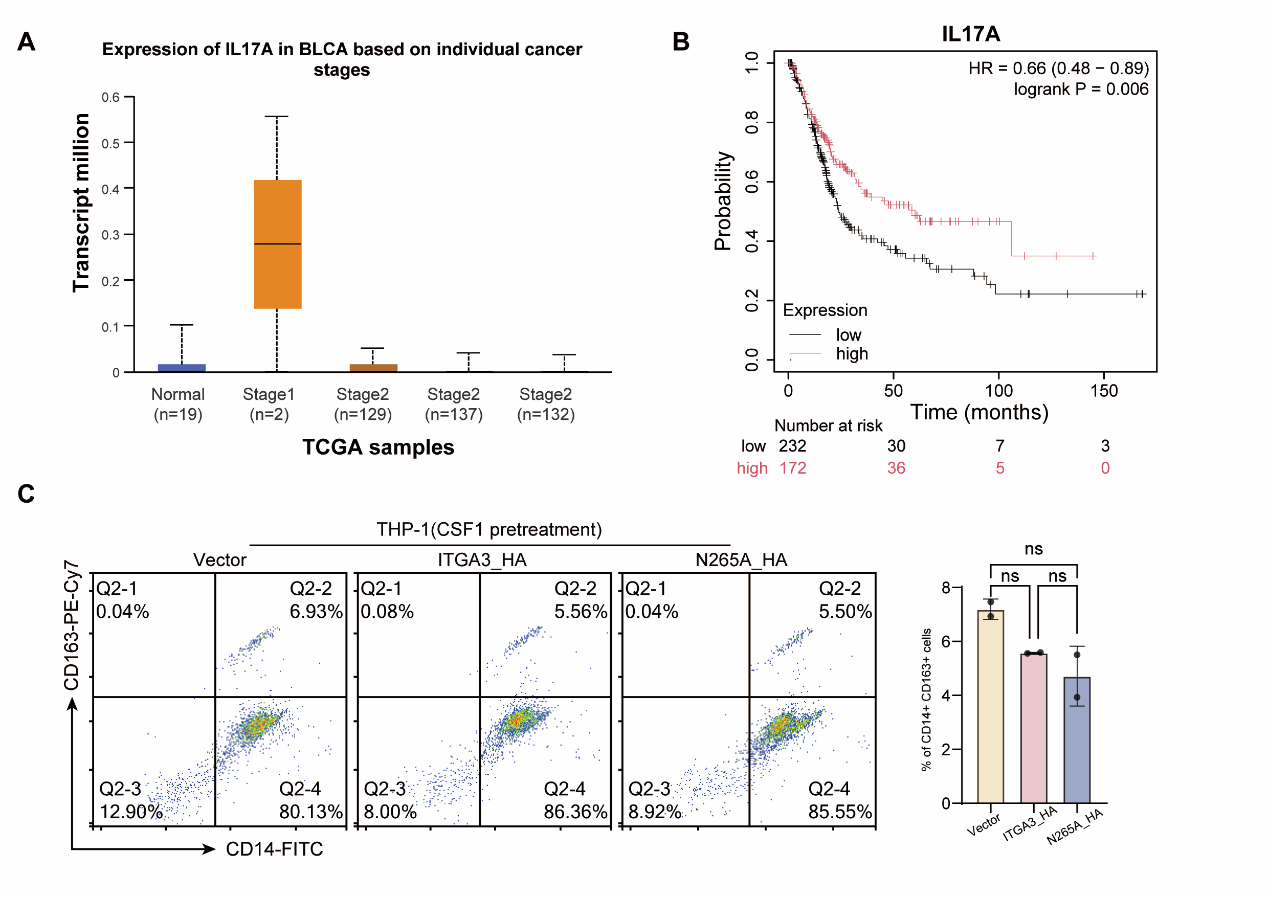
** **Fig. S2 Association of ITGA3/sLeX with immune regulation and clinical outcomes in BLCA.** **(A)** IL17A expression across different stages of BLCA using UALCAN database. **(B)** Kaplan-Meier overall survival analysis of TCGA BLCA patients stratified by IL17A expression. **(C)** Flow cytometry analysis of CD163⁺/CD14⁺ THP-1 cells after co-culture with Vector, ITGA3_HA, N265A_HA. Data represent means ± SEM from three independent experiments. Statistical significance was assessed by two-tailed Student’s t test (ns, no significance).


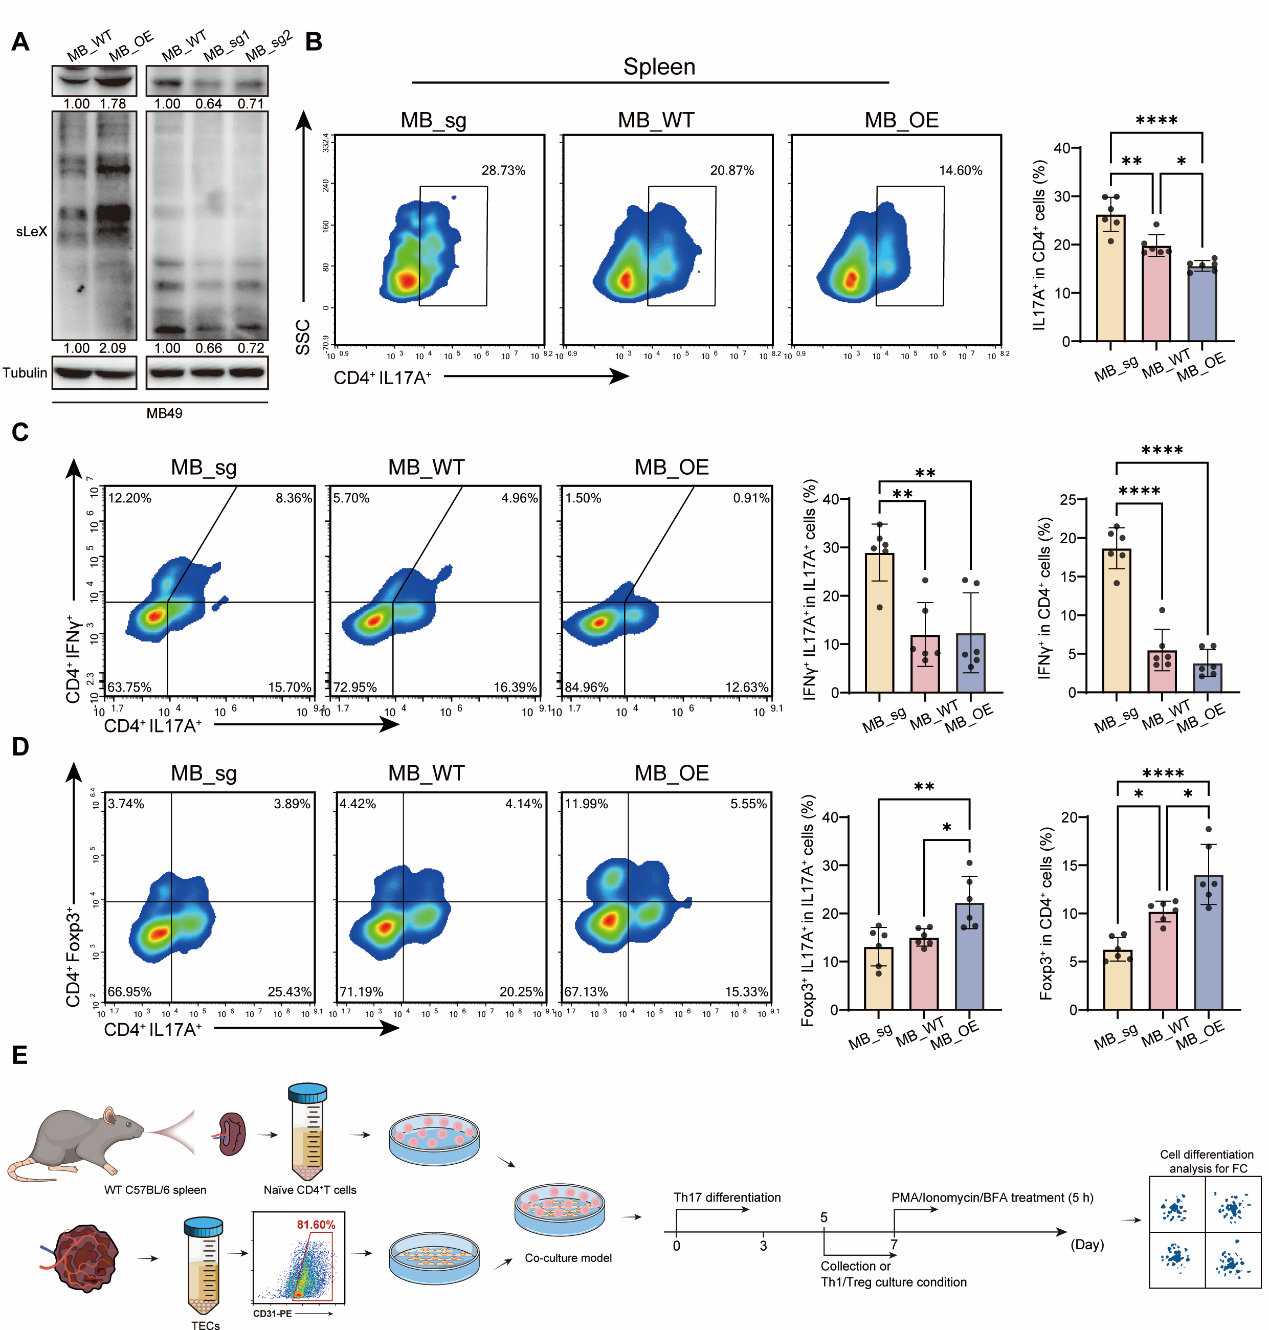


**Fig. S3 FUT7-dependent sLeX modulation in MB49 cells shapes Th17-associated CD4⁺ T-cell responses in *vivo*.** **(A)** FUT7 was overexpressed (MB_OE), knocked out (MB_sg), or transfected with control vector (MB_WT) in MB49 cells. Western blot analysis of FUT7 expression. **(B-D)** Flow cytometry analysis of splenic CD4⁺ T cells showing the frequencies of IL17A⁺ (B), IFNγ⁺/IL17A⁺ (C), and Foxp3⁺/IL17A⁺ (D) subsets. **(E)** Schematic of splenic naïve CD4⁺ T cells co-cultured with each group of TECs under Th17, Th1, or Treg differentiation conditions. Sample size: n = 6/group, the data represent means ± SEM. Statistical significance was assessed by two-tailed Student’s t test (*p < 0.05, **p < 0.01, ****p < 0.0001).

**
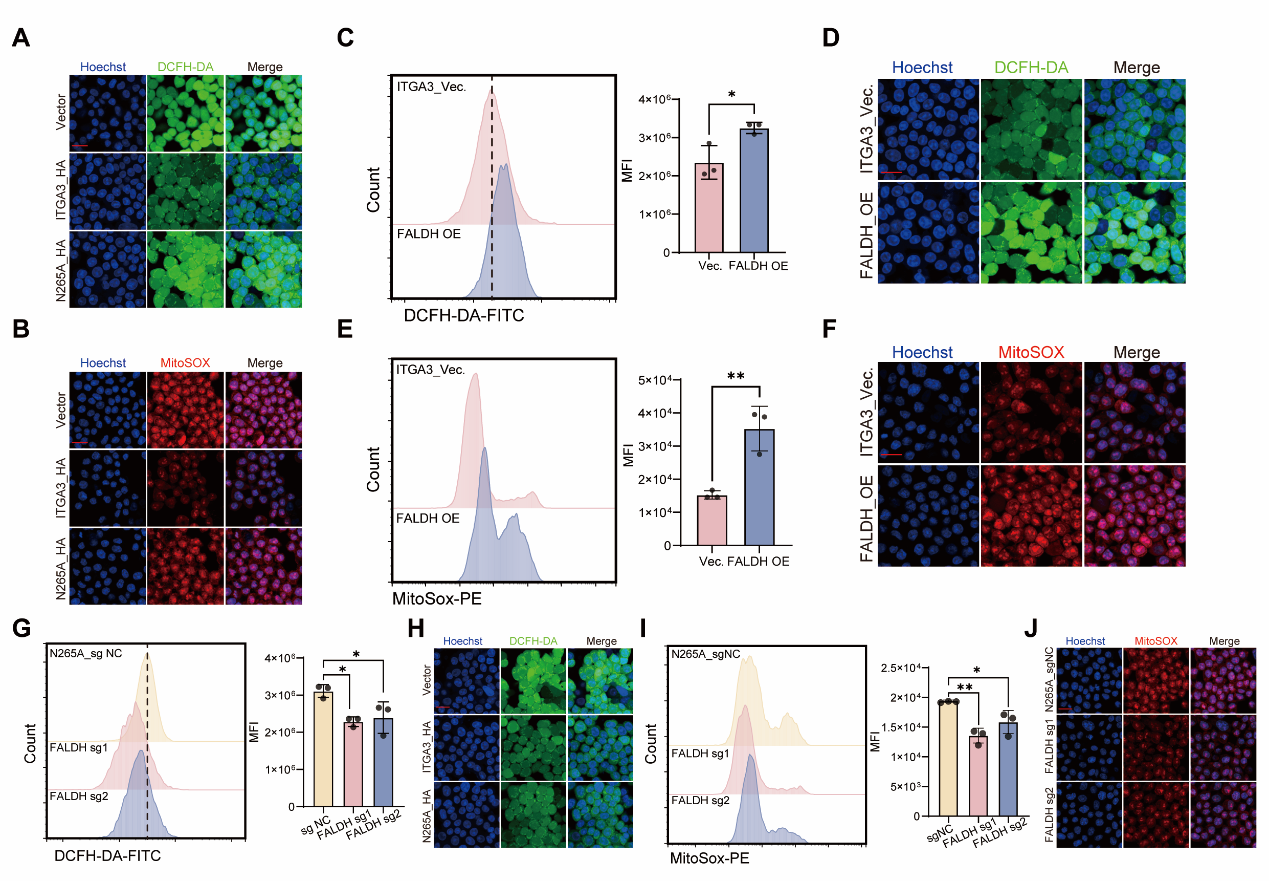
**

**Fig. S4 FALDH regulates FAO activity and ROS production in ECs.** **(A, B)** Fluorescence microscope showing total and mitochondrial ROS using DCFH-DA (A) and MitoSOX (B) staining in indicated ECs. **(C-J)** Flow cytometry (C, E, G, I) and fluorescence microscopy (D, F, H, J) analyses of total and mitochondrial ROS in FALDH OE (C-F) and KO (G-J) ECs. Scale bar: 20 μm. Data represent means ± SEM from three independent experiments. Statistical significance was assessed by two-tailed Student’s t test (*p < 0.05, **p < 0.01).

**
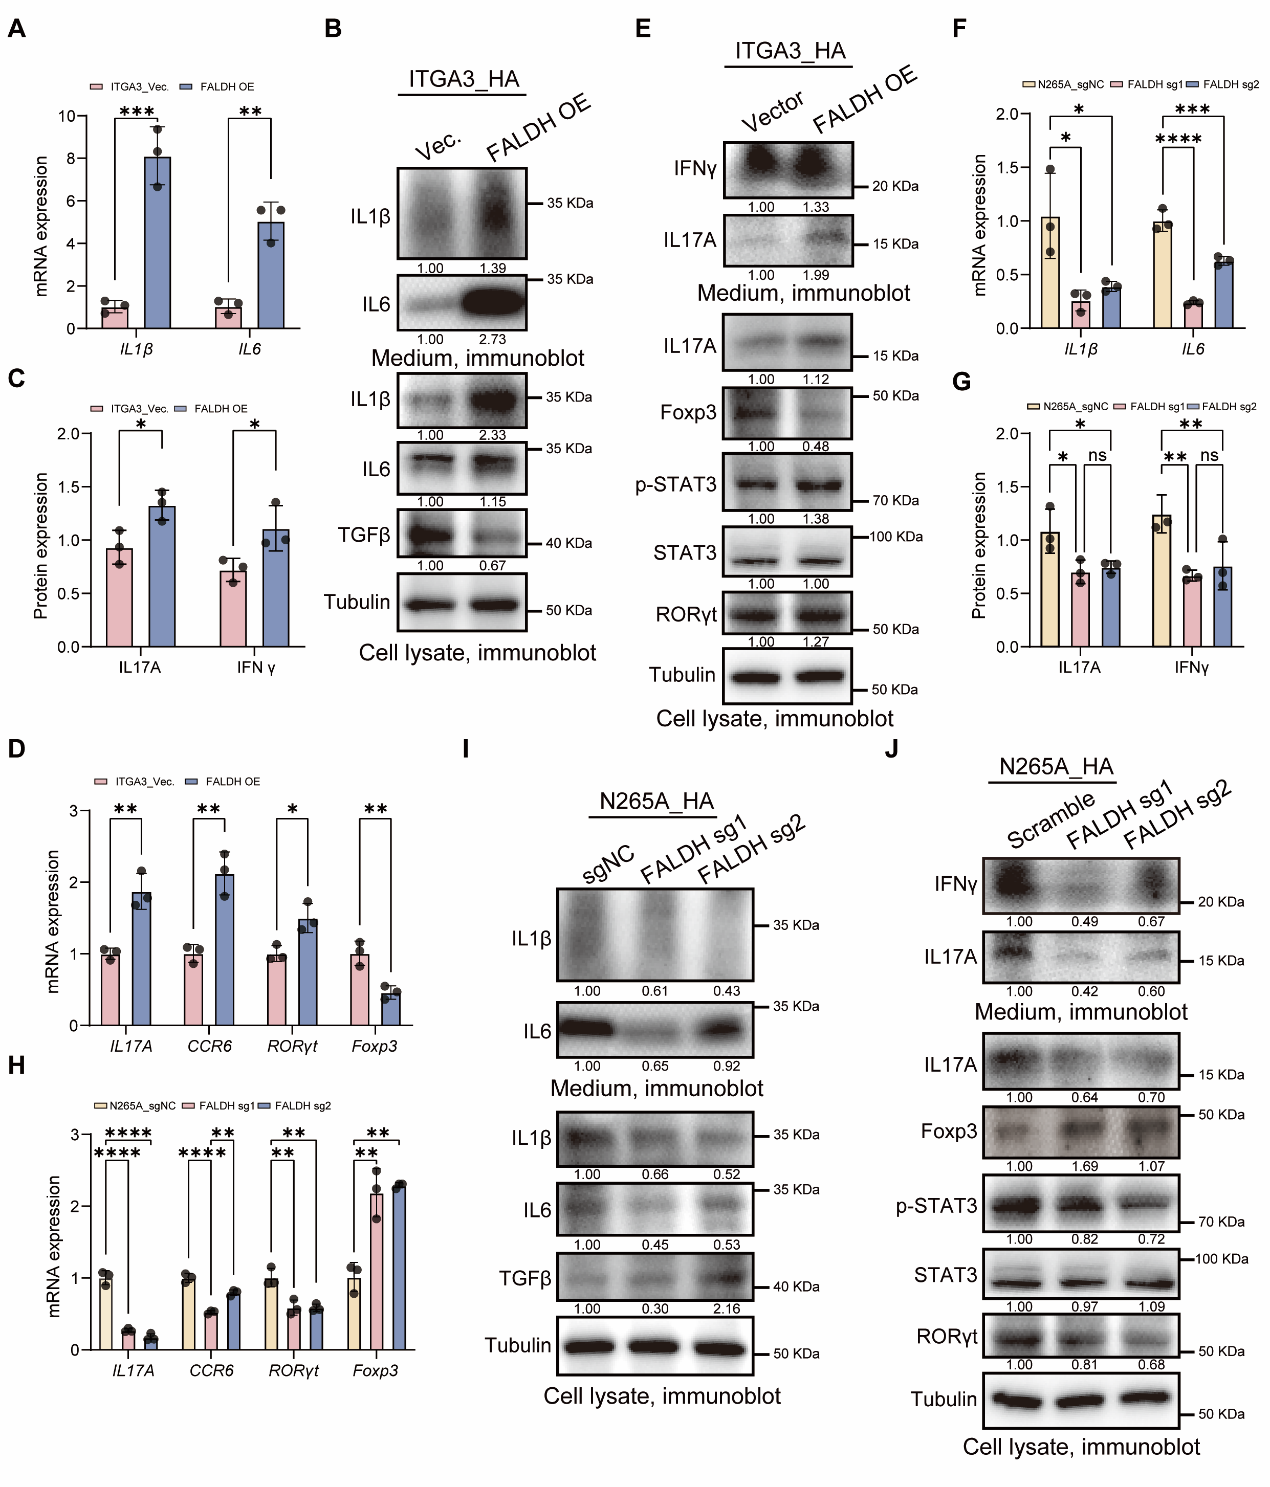
**

**Fig. S5 FALDH influences cytokine production in ECs and Th17 differentiation in Jurkat cells**. **(A, B)** RT-qPCR analysis of IL6 and IL1β mRNA in FALDH OE ECs, and immunoblotting and ELISA of IL6/IL1β/TGFβ proteins in cell lysates and culture supernatants of FALDH OE ECs. **(C-E)** RT-qPCR analysis (d) of IL17A and Th17-associated transcription factors in Jurkat cells after co-culture with FALDH OE ECs, and immunoblotting (E) and ELISA (C) of IL17A and Th17-related proteins in cell lysates and supernatants. **(F-J)** Parallel RT-qPCR, immunoblotting, and ELISA analyses in FALDH KO ECs and in Jurkat cells co-cultured with FALDH KO ECs. Data represent means ± SEM from three independent experiments. Statistical significance was assessed by two-tailed Student’s t test (*p < 0.05, **p < 0.01, ***p < 0.001, ****p < 0.0001).

**
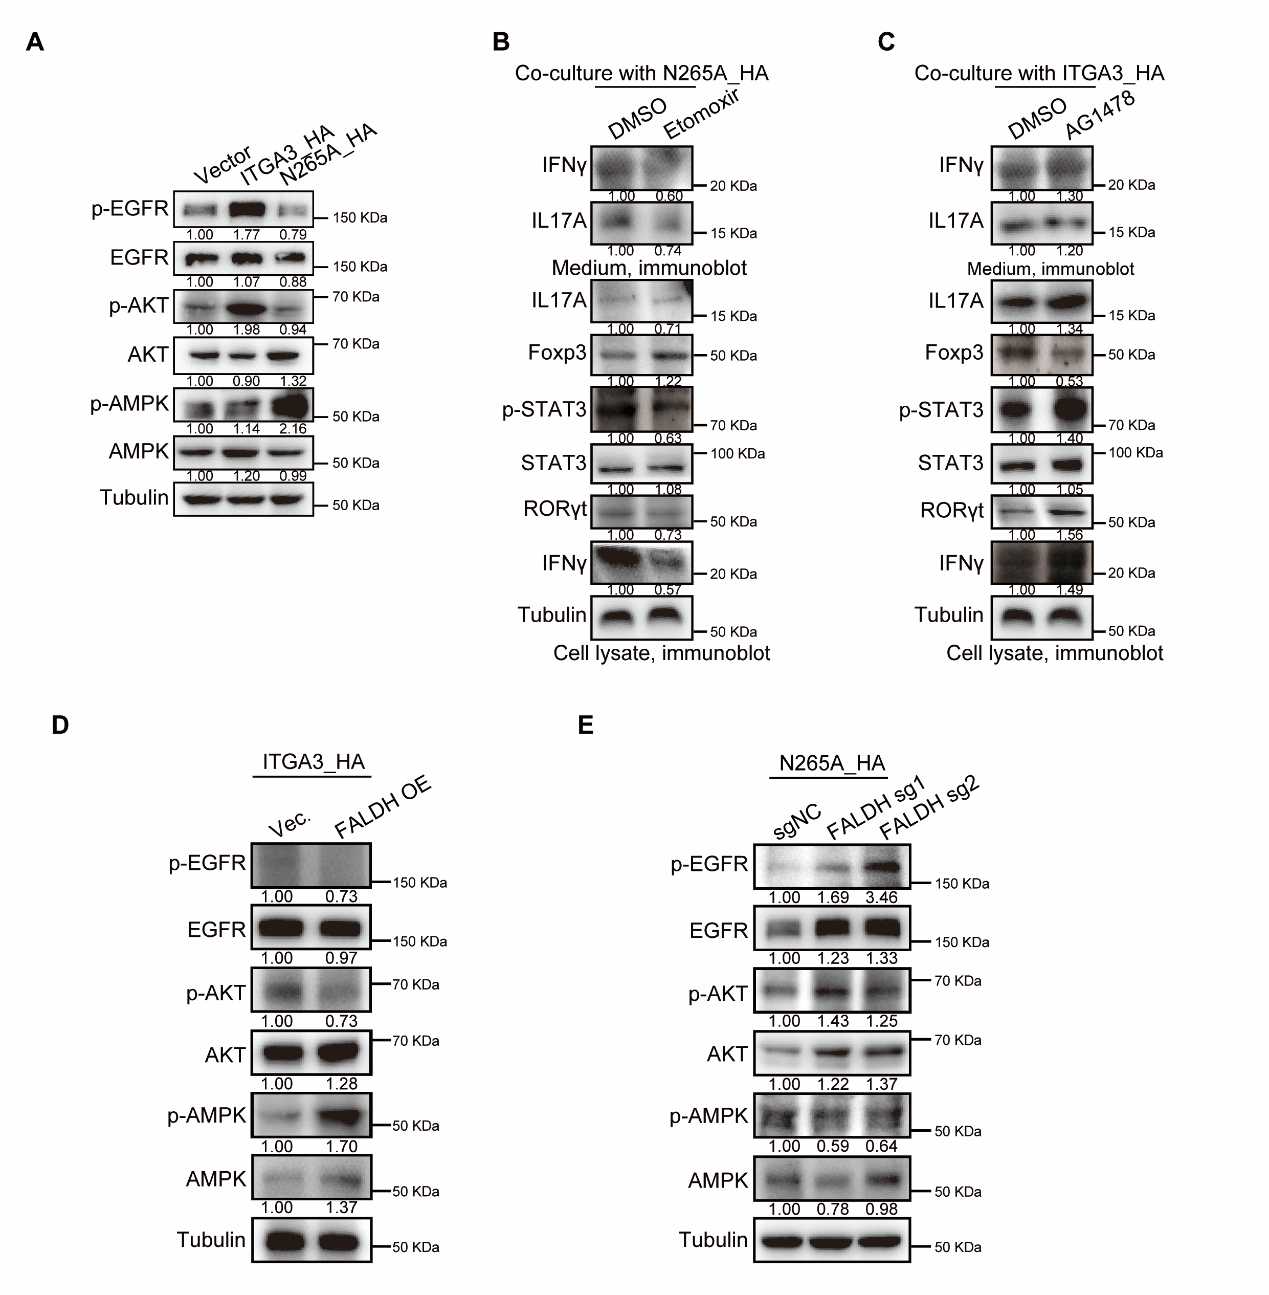
**

**Fig. S6 EGFR and FAO inhibition modulate EC cytokines and Th17 responses.** **(A)** Immunoblotting of EGFR, AKT and AMPK phosphorylation in Vector, ITGA3_HA and N265A_HA cells. **(B)** Immunoblotting of Th17, Th1 and Treg cell markers and transcription factors in cell lysates and medium of Jurkat co-cultured with Etomoxir-pretreated ECs. **(C)** Parallel analyses corresponding to panels b in ITGA3_HA cells treated with AG1478. **(D, E)** Immunoblotting of ERBB and AMPK signaling in FALDH OE (D) and KO ECs (E).
