# Supplementary material
Source: Research Square preprint supplement (doi:10.21203/rs.3.rs-9075517/v1)
Supplement: Supplementary file 2 [file 2e1410784deb9e21079be109.xlsx]

## Sheet: Sheet1
Supplemental Table 2: Co-expressing genes with FUT7 in BLCA
Correlated Gene	Cytoband	Spearman's Correlation	p-Value	q-Value
ARHGAP9	12q13.3	0.887541	5.91e-101	1.18e-96
ACAP1	17p13.1	0.885996	3.9e-100	3.64e-96
SASH3	Xq26.1	0.88572	5.45e-100	3.64e-96
MYO1G	7p13	0.88408	3.9e-99	1.96e-95
IL21R	16p12.1	0.881485	8.28e-98	3.32e-94
DOK2	8p21.3	0.875163	1.06e-94	3.53e-91
PTPN7	1q32.1	0.871573	5.17e-93	1.48e-89
SPN	16p11.2	0.870088	2.5e-92	6.25e-89
WAS	Xp11.23	0.867834	2.63e-91	5.85e-88
CD2	1p13.1	0.865076	4.42e-90	8.85e-87
TBC1D10C	11q13.2	0.864763	6.06e-90	1.1e-86
TNFAIP8L2	1q21.3	0.861738	1.24e-88	2.07e-85
CD48	1q23.3	0.856873	1.37e-86	2.11e-83
SPI1	11p11.2	0.856625	1.73e-86	2.47e-83
LST1	6p21.33	0.856075	2.91e-86	3.89e-83
BIN2	12q13.13	0.855236	6.41e-86	8.02e-83
MYO1F	19p13.2	0.854498	1.28e-85	1.5e-82
SELPLG	12q24.11	0.854134	1.79e-85	1.99e-82
CYTH4	22q13.1	0.853126	4.56e-85	4.81e-82
CD3E	11q23.3	0.851951	1.34e-84	1.34e-81
CXCR3	Xq13.1	0.851082	2.96e-84	2.83e-81
IL10RA	11q23.3	0.850503	5.01e-84	4.56e-81
RASAL3	19p13.12	0.850408	5.46e-84	4.76e-81
SLAMF1	1q23.3	0.849734	1e-83	8.37e-81
ITGAL	16p11.2	0.846375	1.99e-82	1.59e-79
SIT1	9p13.3	0.844095	1.45e-81	1.12e-78
AIF1	6p21.33	0.844036	1.53e-81	1.13e-78
LTB	6p21.33	0.843907	1.7e-81	1.22e-78
ITGB2	21q22.3	0.842866	4.17e-81	2.88e-78
CD52	1p36.11	0.841718	1.11e-80	7.42e-78
JAML	11q23.3	0.841363	1.5e-80	9.71e-78
P2RY13	3q25.1	0.839677	6.22e-80	3.9e-77
NCKAP1L	12q13.13-q13.2	0.839313	8.44e-80	5.12e-77
LAT2	7q11.23	0.838611	1.52e-79	8.93e-77
PARVG	22q13.31	0.837498	3.81e-79	2.18e-76
HCST	19q13.12	0.837315	4.44e-79	2.47e-76
UBASH3A	21q22.3	0.836168	1.14e-78	6.16e-76
BTK	Xq22.1	0.835806	1.53e-78	8.07e-76
NFAM1	22q13.2	0.835691	1.68e-78	8.63e-76
FERMT3	11q13.1	0.834478	4.5e-78	2.26e-75
CD53	1p13.3	0.834195	5.66e-78	2.77e-75
HCK	20q11.21	0.83145	5.09e-77	2.43e-74
NCF1	7q11.23	0.831359	5.47e-77	2.55e-74
CYBB	Xp21.1-p11.4	0.830972	7.44e-77	3.39e-74
WDFY4	10q11.23	0.828302	6.03e-76	2.68e-73
RHOH	4p14	0.827813	8.81e-76	3.84e-73
PLEK	2p14	0.826917	1.76e-75	7.5e-73
CCR5	3p21.31	0.826434	2.55e-75	1.06e-72
PTPRC	1q31.3-q32.1	0.826178	3.1e-75	1.27e-72
TIFAB	5q31.1	0.826035	3.46e-75	1.39e-72
SLAMF6	1q23.2-q23.3	0.823723	2.01e-74	7.89e-72
CD37	19q13.33	0.823665	2.1e-74	8.08e-72
EVI2B	17q11.2	0.823586	2.23e-74	8.41e-72
SLAMF8	1q23.2	0.822879	3.79e-74	1.41e-71
TASL	Xp21.2	0.821761	8.74e-74	3.18e-71
ABI3	17q21.32	0.821173	1.35e-73	4.78e-71
DOCK2	5q35.1	0.821165	1.36e-73	4.78e-71
GPR65	14q31.3	0.820979	1.56e-73	5.4e-71
TYROBP	19q13.12	0.820724	1.89e-73	6.41e-71
TRAF3IP3	1q32.2	0.819777	3.8e-73	1.27e-70
LCP2	5q35.1	0.81954	4.52e-73	1.48e-70
CD5	11q12.2	0.818734	8.17e-73	2.62e-70
CD27	12p13.31	0.818722	8.24e-73	2.62e-70
CD7	17q25.3	0.817653	1.8e-72	5.62e-70
LILRB2	19q13.4	0.817535	1.96e-72	6.03e-70
IL2RG	Xq13.1	0.817287	2.34e-72	7.11e-70
CTLA4	2q33.2	0.81721	2.48e-72	7.41e-70
CYTIP	2q24.1	0.816981	2.92e-72	8.61e-70
CST7	20p11.21	0.816755	3.44e-72	9.99e-70
MPEG1	11q12.1	0.81651	4.11e-72	1.18e-69
PIK3R5	17p13.1	0.816156	5.3e-72	1.5e-69
AOAH	7p14.2	0.816114	5.47e-72	1.52e-69
CLEC10A	17p13.1	0.815824	6.73e-72	1.85e-69
MNDA	1q23.1	0.815701	7.36e-72	1.99e-69
C1ORF162	1p13.2	0.814596	1.62e-71	4.33e-69
CD3D	11q23.3	0.814476	1.77e-71	4.66e-69
SH2D1A	Xq25	0.81407	2.36e-71	6.13e-69
LTA	6p21.33	0.814029	2.43e-71	6.23e-69
RNASE6	14q11.2	0.81346	3.63e-71	9.22e-69
C1QA	1p36.12	0.813085	4.74e-71	1.19e-68
FCER1G	1q23.3	0.812982	5.1e-71	1.26e-68
IRF8	16q24.1	0.81277	5.92e-71	1.45e-68
PDCD1	2q37.3	0.812099	9.49e-71	2.29e-68
IRF4	6p25.3	0.811828	1.15e-70	2.74e-68
IL12RB1	19p13.11	0.811686	1.27e-70	2.99e-68
CD300LF	17q25.1	0.810334	3.26e-70	7.59e-68
ICOS	2q33.2	0.8093	6.67e-70	1.54e-67
SNX20	16q12.1	0.808983	8.3e-70	1.89e-67
MS4A6A	11q12.2	0.808823	9.27e-70	2.09e-67
LAIR1	19q13.42	0.808414	1.23e-69	2.72e-67
SLA2	20q11.23	0.808403	1.24e-69	2.72e-67
HAVCR2	5q33.3	0.808103	1.52e-69	3.31e-67
TLR8	Xp22.2	0.80785	1.81e-69	3.9e-67
NCF1C	7q11.23	0.807624	2.11e-69	4.5e-67
HLA-DPB1	6p21.32	0.807286	2.66e-69	5.61e-67
CMKLR1	12q23.3	0.805423	9.42e-69	1.97e-66
CSF1R	5q32	0.804954	1.29e-68	2.67e-66
NCF1B	7q11.23	0.804748	1.49e-68	3.04e-66
PTPN22	1p13.2	0.802625	6.14e-68	1.24e-65
GAB3	Xq28	0.801969	9.49e-68	1.9e-65
SIGLEC10	19q13.41	0.801725	1.11e-67	2.21e-65
CLEC4A	12p13.31	0.801252	1.52e-67	2.99e-65
ZAP70	2q11.2	0.801173	1.6e-67	3.12e-65
NKG7	19q13.41	0.801097	1.69e-67	3.25e-65
DCANP1	5q31.1	0.800452	2.58e-67	4.92e-65
IKZF1	7p12.2	0.799979	3.52e-67	6.64e-65
ITK	5q33.3	0.799755	4.07e-67	7.62e-65
CD4	12p13.31	0.799652	4.35e-67	8.07e-65
C1QB	1p36.12	0.799366	5.25e-67	9.64e-65
FAM78A	9q34.13	0.798496	9.24e-67	1.68e-64
C1QC	1p36.12	0.797427	1.85e-66	3.33e-64
SLA	8q24.22	0.797164	2.19e-66	3.91e-64
GNGT2	17q21.32	0.796337	3.72e-66	6.59e-64
LRRC25	19p13.11	0.795905	4.9e-66	8.62e-64
CD247	1q24.2	0.793089	2.93e-65	5.1e-63
CD33	19q13.41	0.792256	4.95e-65	8.54e-63
HLA-DMB	6p21.32	0.791276	9.13e-65	1.56e-62
PRF1	10q22.1	0.790073	1.93e-64	3.27e-62
IL2RB	22q12.3	0.789944	2.09e-64	3.51e-62
MAP4K1	19q13.2	0.789671	2.47e-64	4.13e-62
LILRB1	19q13.42	0.789293	3.12e-64	5.17e-62
CD86	3q13.33	0.788945	3.87e-64	6.35e-62
LILRB4	19q13.42	0.786661	1.56e-63	2.55e-61
SAMSN1	21q11.2	0.786422	1.81e-63	2.92e-61
LINC00426	13q12.3	0.786079	2.23e-63	3.57e-61
CEACAM4	19q13.2	0.785931	2.44e-63	3.87e-61
BTLA	3q13.2	0.785182	3.83e-63	6.04e-61
C3AR1	12p13.31	0.78515	3.91e-63	6.11e-61
EVI2A	17q11.2	0.784736	5.01e-63	7.78e-61
IGSF6	16p12.2	0.784115	7.28e-63	1.12e-60
PTPRCAP	11q13.2	0.78363	9.73e-63	1.49e-60
HK3	5q35.2	0.783554	1.02e-62	1.55e-60
PYHIN1	1q23.1	0.783204	1.26e-62	1.89e-60
CEACAM21	19q13.2	0.783142	1.3e-62	1.95e-60
NLRC3	16p13.3	0.782396	2.03e-62	3.01e-60
P2RY10	Xq21.1	0.782366	2.07e-62	3.04e-60
RUNX3	1p36.11	0.780873	5e-62	7.32e-60
GIMAP1	7q36.1	0.780568	5.99e-62	8.69e-60
PIK3R6	17p13.1	0.779876	8.99e-62	1.3e-59
IL2RA	10p15.1	0.779752	9.67e-62	1.38e-59
GZMB	14q12	0.779411	1.18e-61	1.68e-59
CD300A	17q25.1	0.779257	1.29e-61	1.82e-59
CCR2	3p21.31	0.778336	2.21e-61	3.1e-59
TIGIT	3q13.31	0.778272	2.29e-61	3.19e-59
HLA-DQA1	6p21.32	0.778092	2.55e-61	3.52e-59
TMEM150B	19q13.42	0.777875	2.89e-61	3.96e-59
FGL2	7q11.23	0.777643	3.31e-61	4.51e-59
PSTPIP1	15q24.3	0.777418	3.77e-61	5.1e-59
GZMA	5q11.2	0.776742	5.57e-61	7.49e-59
HLA-DRA	6p21.32	0.776092	8.09e-61	1.08e-58
TBX21	17q21.32	0.775896	9.06e-61	1.2e-58
NAPSB	19q13.33	0.775852	9.29e-61	1.22e-58
ZNF831	20q13.32	0.775395	1.21e-60	1.58e-58
CD14	5q31.3	0.77507	1.45e-60	1.89e-58
TNFSF13B	13q33.3	0.773937	2.78e-60	3.59e-58
SLC7A7	14q11.2	0.773717	3.15e-60	4.04e-58
LY86	6p25.1	0.772959	4.83e-60	6.17e-58
CD74	5q33.1	0.772829	5.2e-60	6.6e-58
ALOX5AP	13q12.3	0.771995	8.33e-60	1.05e-57
SCML4	6q21	0.771413	1.16e-59	1.45e-57
JAKMIP1	4p16.1	0.77053	1.89e-59	2.36e-57
FCGR1BP	1p11.2	0.770437	2e-59	2.47e-57
GBP5	1p22.2	0.770396	2.04e-59	2.51e-57
GRAP2	22q13.1	0.767512	1.01e-58	1.23e-56
SIGLEC1	20p13	0.767195	1.2e-58	1.46e-56
LILRB3	19q13.42	0.767036	1.31e-58	1.58e-56
CXCR6	3p21.31	0.765898	2.45e-58	2.94e-56
WIPF1	2q31.1	0.765743	2.66e-58	3.17e-56
BCL2A1	15q25.1	0.764916	4.18e-58	4.95e-56
KLRK1	12p13.2	0.764341	5.71e-58	6.72e-56
SP140	2q37.1	0.764305	5.82e-58	6.82e-56
CLECL1P	12p13.31	0.764203	6.15e-58	7.16e-56
GZMK	5q11.2	0.764005	6.85e-58	7.93e-56
CORO1A	16p11.2	0.763992	6.89e-58	7.94e-56
LAPTM5	1p35.2	0.763908	7.22e-58	8.26e-56
CD28	2q33.2	0.76374	7.9e-58	8.99e-56
CCL4	17q12	0.763682	8.15e-58	9.23e-56
RGS18	1q31.2	0.762852	1.28e-57	1.44e-55
ITGAM	16p11.2	0.762641	1.43e-57	1.6e-55
RASGRP4	19q13.2	0.761753	2.3e-57	2.56e-55
CD180	5q12.3	0.761678	2.39e-57	2.65e-55
GPR171	3q25.1	0.761464	2.68e-57	2.95e-55
FCGR1A	1q21.2	0.761428	2.73e-57	2.99e-55
SAMD3	6q23.1	0.760529	4.41e-57	4.81e-55
LYZ	12q15	0.760366	4.81e-57	5.21e-55
ZC3H12D	6q25.1	0.760352	4.85e-57	5.22e-55
SIGLEC9	19q13.3-q13.4	0.760283	5.03e-57	5.39e-55
TAGAP	6q25.3	0.759751	6.67e-57	7.11e-55
C11ORF21	11p15.5	0.759681	6.92e-57	7.34e-55
IFI30	19p13.11	0.759563	7.37e-57	7.77e-55
CD38	4p15.32	0.759532	7.49e-57	7.86e-55
SIGLEC7	19q13.41	0.759101	9.41e-57	9.82e-55
CD6	11q12.2	0.759029	9.77e-57	1.01e-54
FCGR1CP	1q21.1	0.758886	1.05e-56	1.09e-54
DOCK10	2q36.2	0.758162	1.54e-56	1.58e-54
ITGAX	16p11.2	0.75814	1.56e-56	1.6e-54
CD80	3q13.33	0.757326	2.39e-56	2.43e-54
MFNG	22q13.1	0.757043	2.77e-56	2.81e-54
SLCO2B1	11q13.4	0.756415	3.85e-56	3.88e-54
SCIMP	17p13.2	0.754804	8.88e-56	8.9e-54
S100B	21q22.3	0.754772	9.03e-56	9e-54
GPR84	12q13.13	0.754287	1.16e-55	1.15e-53
SIRPG	20p13	0.754266	1.17e-55	1.16e-53
TFEC	7q31.2	0.754224	1.2e-55	1.18e-53
ZBP1	20q13.31	0.754054	1.31e-55	1.28e-53
HLA-DPA1	6p21.32	0.754019	1.33e-55	1.3e-53
PILRA	7q22.1	0.75364	1.62e-55	1.57e-53
LAG3	12p13.31	0.75214	3.49e-55	3.36e-53
GGTA1	9q33.2	0.751887	3.97e-55	3.81e-53
RASSF4	10q11.21	0.751733	4.3e-55	4.08e-53
STAT4	2q32.2-q32.3	0.751733	4.3e-55	4.08e-53
LCK	1p35.2	0.751591	4.62e-55	4.36e-53
CD3G	11q23.3	0.751279	5.41e-55	5.09e-53
TBXAS1	7q34	0.750886	6.61e-55	6.19e-53
NCF2	1q25.3	0.750843	6.76e-55	6.29e-53
OSCAR	19q13.42	0.75046	8.2e-55	7.61e-53
