# Supplementary material
Source: Research Square preprint supplement (doi:10.21203/rs.3.rs-9075517/v1)
Supplement: Supplementary file 3 [file 2eedb1daced8a0303fe24c06.xlsx]

## Sheet: Sheet1
Supplemental Table 1: Primers sequence used in this study
ID	Primer	Sequence (5'-3')
1	CDH5_F1_ChIP_qPCR	AGGTCATGCAGGCAGCAACG
2	CDH5_R1_ChIP_qPCR	GCAACAGTGGAGGCAGTGGG
3	CDH5_F2_ChIP_qPCR	CCATAAGCTGTTGGGTTCCA
4	CDH5_R2_ChIP_qPCR	GGTTGAGTTTGAGATGCTCGTTA
5	CDH5_F3_ChIP_qPCR	TCCATTCCCACAAAGACATCA
6	CDH5_R3_ChIP_qPCR	GCAGCATCACATTTAACCCTC
7	Mus_FUT7_sgRNA1	CCAGGCCCGCAGCCTCCTGG
8	Mus_FUT7_sgRNA1	CAGGGTACCACCCCACCAGG
9	hsa_AL3A2 sgRNA1	TGAATTCAATGTGTACAGTC
10	hsa_AL3A2 sgRNA2	GGAAGTCATTACTGTCCTTG
11	Real time_Homo_CCR6 F	TTCAGCGATGTTTTCGACTCC
12	Real time_Homo_CCR6 R	GCAATCGGTACAAATAGCCTGG
13	Real time_Homo_CD31 F	AACAGTGTTGACATGAAGAGCC
14	Real time_Homo_CD31 R	TGTAAAACAGCACGTCATCCTT
15	Real time_Homo_CDH5 F	TCTTGCGACTCACGCTTGAC
16	Real time_Homo_CDH5 F	TTGGAACCAGATGCACATTGAT
17	Real time_Homo_FN1 F	CGGTGGCTGTCAGTCAAAG
18	Real time_Homo_FN1 R	AAACCTCGGCTTCCTCCATAA
19	Real time_Homo_Foxp3 F	GTGGCCCGGATGTGAGAAG
20	Real time_Homo_Foxp3 R	GGAGCCCTTGTCGGATGATG
21	Real time_Homo_GAPDH F	GTCTCCTCTGACTTCAACAGCG
22	Real time_Homo_GAPDH R	ACCACCCTGTTGCTGTAGCCAA
23	Real time_Homo_IL17 F	TCCCACGAAATCCAGGATGC
24	Real time_Homo_IL17 R	GGATGTTCAGGTTGACCATCAC
25	Real time_Homo_IL1β F	CCAAACCTCTTCGAGGCACA
26	Real time_Homo_IL1β R	GCTGCTTCAGACACTTGAGC
27	Real time_Homo_IL6 F	CCGGGAACGAAAGAGAAGCTC
28	Real time_Homo_IL6 R	ACCGAAGGCGCTTGTGGAG
29	Real time_Homo_RORC F	GTGGGGACAAGTCGTCTGG
30	Real time_Homo_RORC R	AGTGCTGGCATCGGTTTCG
31	Real time_Homo_SNAL2 F	CGAACTGGACACACATACAGTG
32	Real time_Homo_SNAL2 R	CTGAGGATCTCTGGTTGTGGT
33	Real time_Homo_VIM F	GACGCCATCAACACCGAGTT
34	Real time_Homo_VIM R	CTTTGTCGTTGGTTAGCTGGT
35	Real time_Homo_vWF F	CCGATGCAGCCTTTTCGGA
36	Real time_Homo_vWF R	TCCCCAAGATACACGGAGAGG
