# Supplementary material
Source: Research Square preprint supplement (doi:10.21203/rs.3.rs-9075517/v1)
Supplement: Supplementary file 4 [file 643500666804789b8bd28f47.xlsx]

## Sheet: Sheet 1
Supplemental Table 5: Pathway analysis of significant proteins
ID	Description	GeneRatio	BgRatio	pvalue	p.adjust	qvalue	geneID	Count
hsa00510	N-Glycan biosynthesis	5/53	54/8535	1.9125e-05	0.00158542	0.00151118	ALG5/RPN2/RPN1/STT3B/DDOST	5
hsa01212	Fatty acid metabolism	5/53	57/8535	2.49673e-05	0.00158542	0.00151118	HACD3/ACSL5/OXSM/MCAT/HSD17B12	5
hsa00513	Various types of N-glycan biosynthesis	4/53	42/8535	0.000124563	0.00527316	0.00502622	RPN2/RPN1/STT3B/DDOST	4
hsa00061	Fatty acid biosynthesis	3/53	18/8535	0.000172754	0.00548493	0.00522807	ACSL5/OXSM/MCAT	3
hsa00100	Steroid biosynthesis	3/53	20/8535	0.000239237	0.00607661	0.00579205	DHCR24/EBP/NSDHL	3
hsa04141	Protein processing in endoplasmic reticulum	6/53	170/8535	0.000604355	0.0127922	0.0121931	SSR1/RPN2/RPN1/STT3B/DDOST/UBQLN4	6
hsa00062	Fatty acid elongation	2/53	27/8535	0.0120254	0.190903	0.181963	HACD3/HSD17B12	2
hsa01040	Biosynthesis of unsaturated fatty acids	2/53	27/8535	0.0120254	0.190903	0.181963	HACD3/HSD17B12	2
hsa04216	Ferroptosis	2/53	42/8535	0.027806	0.368912	0.351636	PCBP2/ACSL5	2
hsa00071	Fatty acid degradation	2/53	43/8535	0.0290482	0.368912	0.351636	ACSL5/ALDH3A2	2
