# Supplementary material
Source: Research Square preprint supplement (doi:10.21203/rs.3.rs-9075517/v1)
Supplement: Supplementary file 5 [file e0fef7cbb151645637e8347a.xlsx]

## Sheet: Vector Vs. ITGA3_HA
Supplemental Table 3-1: The full list of proteins in ITGA3_HA Vs. Vector identified by 2D-LC-MS/MS
LFQ intensity 3ha_1	LFQ intensity 3ha_2	LFQ intensity 3ha_3	LFQ intensity huvec_1	LFQ intensity huvec_2	LFQ intensity huvec_3	C: Student's T-test Significant 3ha_huvec	C: Student's T-test significant	N: -Log Student's T-test p-value 3ha_huvec	N: Student's T-test q-value 3ha_huvec	N: Student's T-test Difference 3ha_huvec	N: Student's T-test Test statistic 3ha_huvec	T: N: Q-value	T: T: Protein IDs	T: T: Majority protein IDs	T: T: Protein names	T: T: Gene names
28.745	28.6378	27.1952	28.1165	28.2523	28.1846			0.00533393	1	0.00815837	0.0162765	0	A0A024QZP7;P06493;A0A087WZZ9;E5RIU6	A0A024QZP7;P06493;A0A087WZZ9;E5RIU6	Cyclin-dependent kinase 1	CDC2;CDK1
29.3762	29.6509	28.639	29.3703	29.4441	29.2425			0.158733	1	-0.130282	-0.423288	0	A0A024R4E5;Q00341;H0Y394;H7C0A4;C9JIZ1;C9J5E5;C9JZI8;C9JES8;C9JHZ8;C9JHS7;C9JK79;C9JT62;H7C2D1;C9JHN6;C9JEJ8;C9JBS3;H7BZC3;C9JQ82;C9JMQ6;C9J739;C9JHS9	A0A024R4E5;Q00341;H0Y394	Vigilin	HDLBP
28.6393	29.1317	27.3941	28.114	28.5024	28.5655			0.00341808	1	-0.00560252	-0.010453	0	A0A024R571;Q9H4M9;C9JC03;C9J2Z4;C9JDQ8;C9JIJ3;C9IZH1;Q9NZN4	A0A024R571;Q9H4M9;C9JC03;C9J2Z4	EH domain-containing protein 1	EHD1
29.3597	29.8482	28.0602	29.357	29.3993	29.7058			0.296262	1	-0.397987	-0.73059	0	A0A024RA52;P25787;A0A7I2V2H3;A0A7I2YQP7;C9JCK5;H3BT36	A0A024RA52;P25787;A0A7I2V2H3;A0A7I2YQP7;C9JCK5	Proteasome subunit alpha type;Proteasome subunit alpha type-2	PSMA2
29.5095	30.0375	26.8804	29.8011	29.9716	31.0231			0.624883	0.761419	-1.45615	-1.38887	0	Q92804;A0A075B7D9;A0A075B7F4	Q92804;A0A075B7D9	TATA-binding protein-associated factor 2N	TAF15
31.3077	31.1931	29.8745	31.1855	31.3672	31.2961			0.457855	0.996029	-0.491172	-1.06112	0	F8W809;A0A087WSW9;A0A182DWI3;A0A087WSY9;Q16881;E9PIR7;E9PKD3;A0A0B4J225;E9PIZ5;E9PLT3;E9PKI4;E9PQI3;E9PRI8;E9PJU2	F8W809;A0A087WSW9;A0A182DWI3;A0A087WSY9;Q16881;E9PIR7	Thioredoxin reductase 1, cytoplasmic	TXNRD1
26.8789	27.7405	24.9119	26.8045	27.5367	28.7219			0.51283	0.942085	-1.17726	-1.16982	0	A0A087WT45;Q4V328;A0A087WXA6;A0A087WW92;A0A087WZF5	A0A087WT45;Q4V328	GRIP1-associated protein 1	GRIPAP1
25.8744	26.3417	26.0093	26.7828	26.4701	26.4101			1.24552	0.213121	-0.479232	-2.65276	0	A0A087WTA5;E7ERK9;Q9UI10;A0A087WW69;H7C2L8	A0A087WTA5;E7ERK9;Q9UI10;A0A087WW69;H7C2L8	Translation initiation factor eIF-2B subunit delta	EIF2B4
29.5927	29.772	25.2565	29.9919	30.6383	27.6831			0.287751	1	-1.23069	-0.712479	0	A6NNI4;A0A2R8Y478;A0A7I2V3T0;A0A7I2V3T7;G8JLH6;A0A087WU13;F5GXT1;P21926	A6NNI4;A0A2R8Y478;A0A7I2V3T0;A0A7I2V3T7;G8JLH6;A0A087WU13;F5GXT1;P21926	Tetraspanin;CD9 antigen	CD9
26.3352	27.3993	25.1076	26.0875	26.5397	26.8297			0.10609	1	-0.204866	-0.294162	0	A0A087WU65;A0A2R8YE10;Q9NRW7;A0A2R8YD95;A0A2R8YF01;A0A1B0GXI6;A0A2R8YEX8;B7Z7G7	A0A087WU65;A0A2R8YE10;Q9NRW7;A0A2R8YD95;A0A2R8YF01;A0A1B0GXI6	Vacuolar protein sorting-associated protein 45	VPS45
26.9916	27.557	25.4058	26.8787	26.832	26.4914			0.0429448	1	-0.0825392	-0.125951	0	Q8WYA6;A0A087WUB9;A2A2P1	Q8WYA6;A0A087WUB9	Beta-catenin-like protein 1	CTNNBL1
26.2008	25.6548	25.5156	27.2286	27.2753	27.263	+	3ha_huvec	2.65737	0.00688889	-1.46526	-6.99244	0	E9PL01;A0A087WUC6;E9PI68;Q15005;E9PRB9;H0YE04	E9PL01;A0A087WUC6;E9PI68;Q15005;E9PRB9	Signal peptidase complex subunit 2	SPCS2
29.2448	28.8344	27.4571	29.5385	29.6685	29.6188			0.946572	0.359869	-1.09648	-2.02315	0	A0A087WUK2;O14979	A0A087WUK2;O14979	Heterogeneous nuclear ribonucleoprotein D-like	HNRNPDL
28.6948	29.0186	27.8284	28.8974	28.958	29.0206			0.551391	0.893134	-0.444697	-1.24546	0	A0A087WUT6;O60841	A0A087WUT6;O60841	Eukaryotic translation initiation factor 5B	EIF5B
28.0903	28.739	27.2306	28.3817	27.8373	27.8501			0.00213596	1	-0.00308927	-0.00654159	0	Q99417;A0A087WV05;A0A0D9SEI7	Q99417;A0A087WV05	C-Myc-binding protein	MYCBP
28.2132	28.5089	26.0365	27.6556	27.8357	27.3129			0.00627272	1	-0.0151914	-0.019121	0	A0A087WVM4;B7ZM99;Q6UB35;Q4VXM0;Q4VXV2;H0Y327;Q4VXM1	A0A087WVM4;B7ZM99;Q6UB35	Monofunctional C1-tetrahydrofolate synthase, mitochondrial	MTHFD1L
31.3218	31.6058	30.6683	31.542	31.5912	31.6017			0.61251	0.770465	-0.379635	-1.36476	0	A0A087WVQ6;Q00610;J3KS13;P53675;A0A087WX41;J3KSQ2;K7EJJ5;J3QL20;J3KRF5;F5H5N6;A0A087WV74;A0A087WXH4	A0A087WVQ6;Q00610	Clathrin heavy chain;Clathrin heavy chain 1	CLTC
27.7452	28.1161	24.0405	27.6882	27.5519	27.0975			0.244201	1	-0.811923	-0.618208	0	A0A087WWF6;P49005;F8W8R3;C9JLE1;C9JHC7;C9IZD2;C9J8Z7;H7C1B3	A0A087WWF6;P49005;F8W8R3;C9JLE1;C9JHC7	DNA polymerase delta subunit 2	POLD2
27.1549	28.1751	25.7505	27.0741	27.3824	26.8898			0.0420743	1	-0.0885976	-0.123504	0	Q5JTY5;Q5RIA9;Q9BRT8;A0A0A0MRU4;Q5RIB0;A0A0A6YYH9;A0A087WWG3;A0A087X140;Q8IUF1;C9J3G2;Q4V339;H0Y5V3;A0A0B4J2F1;F2Z2T4;F8WEU0;E7EUZ7;Q6NVZ8;A0A087WYD2;A0A087WZQ3;A0A0B4J2E3;F8WEG4;H0Y857;Q5RIB3;Q5JTY2;A0A087WTC0;Q5RIB5;A0A087WU37;A0A087X1C0;A0A0B4J1T6	Q5JTY5;Q5RIA9;Q9BRT8;A0A0A0MRU4;Q5RIB0;A0A0A6YYH9;A0A087WWG3;A0A087X140;Q8IUF1;C9J3G2;Q4V339;H0Y5V3;A0A0B4J2F1;F2Z2T4	COBW domain-containing protein 3;COBW domain-containing protein 5;COBW domain-containing protein 1;COBW domain-containing protein 2;COBW domain-containing protein 6	CBWD3;CBWD5;CBWD1;CBWD2;CBWD6;CBWD7
28.6691	28.6867	27.0439	28.5307	28.8648	28.6307			0.41698	1	-0.542206	-0.979386	0	Q9P2T1;A0A087WWM4;H0YNJ6;F8WAN9;H0YMB3;H0YLV5;H0YNH0;H0YLB8;H0YNS9;H0YK13;H0YMV5;H0YK71;H0YMR9;H0YN22;H0YMW6;H0YMG3;A0A0B4J281;H0YKE1;H0YN74;H0YKK3;H0YL68	Q9P2T1;A0A087WWM4;H0YNJ6;F8WAN9;H0YMB3;H0YLV5	GMP reductase 2;GMP reductase	GMPR2
28.1334	28.2043	27.0543	27.682	27.7385	27.7227			0.0784964	1	0.082962	0.222741	0	A0A499FJY3;A0A087WWP4;Q96T37;A0A494C001	A0A499FJY3;A0A087WWP4;Q96T37;A0A494C001	Putative RNA-binding protein 15	RBM15
25.6057	27.0861	25.8321	25.7631	25.5896	26.1699			0.272242	1	0.333809	0.679224	0	A0A087WWS1;Q96FV9;R4GMN4;J3KRD7;J3QQZ3;J3KT14;A0A087WY84	A0A087WWS1;Q96FV9	THO complex subunit 1	THOC1
31.0383	30.3705	30.1428	31.0549	31.3576	31.2242			1.15644	0.244054	-0.695026	-2.45918	0	A0A087WWU8;D6R904;A0A494C0G0;Q5VU61	A0A087WWU8;D6R904		TPM3
28.6768	29.3773	29.4579	29.3737	29.0896	29.4109			0.170211	1	-0.1207	-0.450401	0	Q13148;A0A087WX29;A0A087WYY0;A0A087X260;G3V162;B1AKP7;K7EN94;A0A0A0N0M3;K7EJM5;A0A087WXQ5;A0A087WV68;A0A087WXV3;A0A087WX67;A0A087WW61;A0A0A0MSV7;K7EJ99;K7EL26;A0A087WZC9;A0A087WYE7;A0A087WTZ4	Q13148;A0A087WX29;A0A087WYY0;A0A087X260;G3V162;B1AKP7;K7EN94;A0A0A0N0M3;K7EJM5	TAR DNA-binding protein 43	TARDBP;TDP43
27.9317	28.1388	26.9929	27.7928	27.6859	28.6279			0.307098	1	-0.347733	-0.75352	0	A0A087WXB0;O15126;A0A087WTX8;A0A087WZA6;A0A087WU14	A0A087WXB0;O15126;A0A087WTX8;A0A087WZA6	Secretory carrier-associated membrane protein 1	SCAMP1
26.8473	28.4681	27.1574	27.3346	27.2821	27.602			0.0578632	1	0.0847321	0.167289	0	O95299;E7ESZ7;A0A087WXC5;A0A7I2V594;A0A7I2YQU0;A0A7I2V2X3;A0A7I2V4N8;A0A7I2V2N6;H7C2X4;H7C1Y7;A0A7I2V5B2;A0A7I2V5U7;A0A7I2V419;A0A7I2V458;A0A7I2V2W9;A0A7I2V438;A0A7I2V5L0;A0A7I2V327;A0A7I2V3H5;C9J6X0;A0A7I2V2F6;A0A7I2V3D4;A0A7I2V2I6;Q8N1B9;H7C2W5;A0A7I2V2J5	O95299;E7ESZ7;A0A087WXC5;A0A7I2V594;A0A7I2YQU0;A0A7I2V2X3;A0A7I2V4N8;A0A7I2V2N6;H7C2X4;H7C1Y7;A0A7I2V5B2;A0A7I2V5U7;A0A7I2V419;A0A7I2V458;A0A7I2V2W9;A0A7I2V438;A0A7I2V5L0;A0A7I2V327;A0A7I2V3H5	NADH dehydrogenase [ubiquinone] 1 alpha subcomplex subunit 10, mitochondrial	NDUFA10
30.4083	30.8521	27.8625	30.711	30.922	30.4258			0.446448	1	-0.978647	-1.03841	0	A0A087WXM6;J3QQT2;J3KRX5;A0A0A6YYL6;P18621;J3QLC8;A0A0A0MRF8;J3KRB3;A0A087WWH0;J3QS96;A0A087WY81;J3KSJ0	A0A087WXM6;J3QQT2;J3KRX5;A0A0A6YYL6;P18621;J3QLC8;A0A0A0MRF8;J3KRB3;A0A087WWH0;J3QS96	60S ribosomal protein L17	RPL17;RPL17-C18orf32
25.5493	25.7633	25.0794	27.4581	27.3177	27.8485	+	3ha_huvec	2.89576	0.0103333	-2.07743	-8.08573	0	A0A087WY03;E5RFV3	A0A087WY03;E5RFV3		SREK1
27.3348	28.4863	27.681	28.305	28.1263	28.6424			0.63252	0.744052	-0.523823	-1.40374	0	Q9NP79;A0A087WY55;Q5TGM0	Q9NP79;A0A087WY55	Vacuolar protein sorting-associated protein VTA1 homolog	VTA1
27.7941	27.7764	26.5052	27.7859	27.8067	28.3071			0.591292	0.80892	-0.608049	-1.3234	0	A0A087WY71;E9PFW3;Q96CW1;C9JJ47;C9JTK4;C9JGT8;C9JJD3;C9JPV8;H7C4C3	A0A087WY71;E9PFW3;Q96CW1;C9JJ47	AP-2 complex subunit mu	AP2M1
28.745	29.2664	25.757	27.7732	28.7681	28.4247			0.129543	1	-0.399141	-0.352732	0	A0A087WY82;Q9Y624	A0A087WY82;Q9Y624	Junctional adhesion molecule A	F11R
28.9171	29.4025	25.5435	28.107	28.6208	28.6611			0.155101	1	-0.508591	-0.414638	0	A0A087WZ13;E9PAU2;Q8IY67;K7EKR9;K7EQG2	A0A087WZ13;E9PAU2;Q8IY67	Ribonucleoprotein PTB-binding 1	RAVER1
28.3418	27.8436	26.6581	28.8514	28.4402	28.8343			0.992232	0.325534	-1.09414	-2.11596	0	A0A087WZN1;O43837;A0A087X2E5;A0A0D9SG66	A0A087WZN1;O43837;A0A087X2E5	Isocitrate dehydrogenase [NAD] subunit, mitochondrial;Isocitrate dehydrogenase [NAD] subunit beta, mitochondrial	IDH3B
27.4988	27.7781	27.6125	28.3353	28.3544	28.5904	+	3ha_huvec	2.63797	0.00652632	-0.796893	-6.9095	0	A0A087X0K9;G3V1L9;Q07157;A0A0G2JNH2;A0A7I2V5U5;G5E9E7;H0Y3R8;H0YKB1	A0A087X0K9;G3V1L9;Q07157;A0A0G2JNH2;A0A7I2V5U5;G5E9E7	Tight junction protein ZO-1	TJP1
26.8168	27.2521	25.113	26.5569	26.4849	25.9873			0.0252058	1	0.0509446	0.0752706	0	A0A087X0M4;Q9BWU0;H7C256;A0A087WWF4	A0A087X0M4;Q9BWU0	Kanadaptin	SLC4A1AP
26.7169	27.3724	26.226	26.305	26.4954	26.4007			0.479221	0.972433	0.371429	1.10351	0	A0A087X0W7;Q86TX2;G3V4F2;A0A087WT95;P49753;Q3I5F7	A0A087X0W7;Q86TX2;G3V4F2;A0A087WT95;P49753	Acyl-coenzyme A thioesterase 1;Acyl-coenzyme A thioesterase 2, mitochondrial	ACOT2;ACOT1
27.3464	27.6267	26.6665	27.6542	27.8433	28.0542			0.970821	0.335727	-0.637367	-2.07231	0	Q2TAM5;E9PKH5;A0A087X0W8;Q04206;E9PKV4;A0A087WVP0;E9PI38;E9PQS6;E9PMD5;E9PRX2;E9PJR1;E9PNV4	Q2TAM5;E9PKH5;A0A087X0W8;Q04206;E9PKV4;A0A087WVP0;E9PI38;E9PQS6	Transcription factor p65	RELA
31.451	31.7942	30.9842	31.6885	31.7241	31.8043			0.624166	0.761376	-0.329146	-1.38747	0	A0A087X0X3;P52272;M0R019;M0R2T0;M0R2I7;M0R0N3;M0QYQ7;M0QY96;M0R0Y6;M0QYL3	A0A087X0X3;P52272	Heterogeneous nuclear ribonucleoprotein M	HNRNPM
27.134	27.847	26.883	27.2211	27.464	27.6232			0.180951	1	-0.148112	-0.475476	0	A0A087X142;A6NMH6;A6NFQ9;F8W8I8;Q92599;C9JV02;A0A0A0MRP8;C9J4G8	A0A087X142;A6NMH6;A6NFQ9;F8W8I8;Q92599	Septin-8	45908
27.3624	27.0742	25.4911	27.1058	27.0412	26.9199			0.258714	1	-0.379732	-0.64994	0	A0A087X1E4;P53365;E9PRV8;E9PPY7	A0A087X1E4;P53365	Arfaptin-2	ARFIP2
28.7425	28.8919	28.9968	29.1489	29.2971	29.124			1.57268	0.129396	-0.312912	-3.42125	0	H0YM70;A0A087X1Z3;Q9UL46;H0YKU2	H0YM70;A0A087X1Z3;Q9UL46	Proteasome activator complex subunit 2	PSME2
26.8109	27.9385	24.7681	26.9224	27.2936	27.3382			0.293357	1	-0.678882	-0.724419	0	A0A087X256;Q2M389;F8VYH7;F8W1W1	A0A087X256;Q2M389	WASH complex subunit 7	KIAA1033
27.5476	28.5021	26.3563	27.7776	27.3089	27.9879			0.125011	1	-0.222808	-0.341555	0	E9PDU5;A0A087X295;Q9NNW5;E9PBK6;Q6PKC6;V9GZ65;C9JFP6;V9GYU1;C9K020	E9PDU5;A0A087X295;Q9NNW5	WD repeat-containing protein 6	WDR6
27.2393	27.5848	24.457	27.2646	27.5151	27.1284			0.367395	1	-0.875699	-0.878772	0	A0A087X2D5;Q9BRJ2;A0A0G2JMS5;A0A087WU62	A0A087X2D5;Q9BRJ2;A0A0G2JMS5;A0A087WU62	39S ribosomal protein L45, mitochondrial	MRPL45
29.8281	29.9239	29.434	30.0141	30.1492	30.1727			1.14206	0.249965	-0.383324	-2.42847	0	A0A087X2I1;P62333;H0YJC0;H0YJS8;H0YJX2;H0YJE9;H0YJT1	A0A087X2I1;P62333	26S protease regulatory subunit 10B	PSMC6
29.0133	29.1586	24.9399	28.58	28.8115	29.3655			0.361441	1	-1.21504	-0.866561	0	P30566;A0A7P0Z472;A0A7P0T9A7;A0A096LNY6;A0A1B0GTJ7;A0A1B0GWJ0;A0A1B0GTG9;A0A096LNY5;A0A0A6YY92;A0A7P0T8E4;A0A1B0GWF8;A0A096LP92;A0A096LNY4;A0A096LPA2;A0A096LP76;A0A096LP72;A0A1W2PRX2;B4DEP1;V9GY96	P30566;A0A7P0Z472;A0A7P0T9A7;A0A096LNY6;A0A1B0GTJ7;A0A1B0GWJ0;A0A1B0GTG9;A0A096LNY5;A0A0A6YY92;A0A7P0T8E4;A0A1B0GWF8;A0A096LP92	Adenylosuccinate lyase	ADSL
28.0083	28.6743	24.9842	28.0997	27.8954	28.2372			0.305565	1	-0.855144	-0.750285	0	A0A096LNZ9;A0A096LPJ4;P05161	A0A096LNZ9;A0A096LPJ4;P05161	Ubiquitin-like protein ISG15	ISG15
28.0192	28.5393	26.6132	27.5118	27.9765	27.5692			0.021382	1	0.0380554	0.0641102	0	C9JFE4;A0A096LP07;A0A096LPJ3;A8K070;Q13098;J3QQX0;J3QLT0;J3KSA5;J3KRJ4;J3QS84;J3QS88;J3KTB0;J3QLE8;J3QL53;J3KRE8	C9JFE4;A0A096LP07;A0A096LPJ3;A8K070;Q13098	COP9 signalosome complex subunit 1	GPS1
26.6857	26.6505	25.2355	26.7385	26.5733	26.6007			0.392776	1	-0.446987	-0.930501	0	A0A096LP25;Q2M2I8;A0A096LNZ0;E9PG46;Q6ZSR9	A0A096LP25;Q2M2I8	AP2-associated protein kinase 1	AAK1
28.27	28.615	26.7032	28.3733	28.3322	27.9859			0.241309	1	-0.367696	-0.611845	0	J3KP36;A0A0A0MR88;A0A096LPC5;Q9Y4E1;A0A0A0MT65;B1AP61	J3KP36;A0A0A0MR88;A0A096LPC5;Q9Y4E1	WASH complex subunit FAM21C	FAM21C
30.1294	30.7449	27.9417	30.3435	30.1601	29.65			0.195618	1	-0.445888	-0.509294	0	A0A096LPI6;P0DPI2;A0A0B4J2D5;A0A096LNH5;H7C1F6;H7C2G3;A0A096LP73;A0A2R8YDR7;F2Z2Q0;A0A096LP12;A0A096LNJ1;A0A2R8Y6K9	A0A096LPI6;P0DPI2;A0A0B4J2D5;A0A096LNH5;H7C1F6;H7C2G3		C21orf33
27.8248	27.6933	24.4487	27.8595	27.9936	27.4794			0.430407	1	-1.12186	-1.00634	0	A0A0A0MQS1;Q53H96;B5MD87;F8WEI0	A0A0A0MQS1;Q53H96;B5MD87	Pyrroline-5-carboxylate reductase;Pyrroline-5-carboxylate reductase 3	PYCRL
26.7152	26.9063	24.9162	26.8108	27.009	27.1279			0.555747	0.891836	-0.803341	-1.25398	0	U3KQC1;A0A0A0MQU0;Q9BV38;K7EIR0;K7EML4;A0A087X237;K7EKX5	U3KQC1;A0A0A0MQU0;Q9BV38;K7EIR0	WD repeat-containing protein 18	WDR18
26.8333	27.5922	26.747	27.2672	27.5076	27.6373			0.644438	0.72804	-0.413208	-1.42696	0	A0A0A0MQU4;Q96I15;H7C3V9;H7C277;H7C280;H7C1N7;C9JNL5;H7C4A1;F8WCL3;F8WBU3	A0A0A0MQU4;Q96I15;H7C3V9;H7C277	Selenocysteine lyase	SCLY
27.8731	27.9027	27.922	28.3098	28.1741	28.5243			1.87841	0.0919375	-0.436809	-4.24308	0	C9JP00;A0A0A0MQX8;Q9NR56;H7C4T5;Q86VM6;C9JCX1;H7C4Y1;B1AKI6;Q9NUK0	C9JP00;A0A0A0MQX8;Q9NR56;H7C4T5	Muscleblind-like protein 1	MBNL1
30.3283	30.627	30.2913	30.6708	30.7028	30.5126			0.812402	0.459016	-0.213194	-1.75548	0	A0A0A0MR02;P45880;Q5JSD2;Q5JSD1;A2A3S1	A0A0A0MR02;P45880;Q5JSD2;Q5JSD1	Voltage-dependent anion-selective channel protein 2	VDAC2
27.9922	28.7493	25.1317	28.035	28.2708	27.6801			0.25034	1	-0.704239	-0.631673	0	A0A0A0MR33;G3V5T0;A0A0C4DFM0;G3V267;G3V4T6;O43708;G3V3B9	A0A0A0MR33;G3V5T0;A0A0C4DFM0;G3V267;G3V4T6;O43708;G3V3B9	Maleylacetoacetate isomerase	GSTZ1
28.7045	28.7997	28.3076	29.0359	28.6893	28.9224			0.697771	0.616995	-0.278598	-1.53087	0	A0A0A0MRA5;B7Z4B8;Q9BUJ2;M0R3F1;M0QYZ0;M0QYI8;M0R203;M0QYM5;M0QZV6;M0R0K8	A0A0A0MRA5;B7Z4B8;Q9BUJ2;M0R3F1;M0QYZ0	Heterogeneous nuclear ribonucleoprotein U-like protein 1	HNRNPUL1
25.8196	26.1353	25.4831	28.9815	29.1441	29.4593	+	3ha_huvec	3.86975	0.124	-3.38227	-14.4052	0.0014599	G3V5X4;A0A0A0MRE3;Q8WXH0;A0A0C4DGK3	G3V5X4;A0A0A0MRE3;Q8WXH0	Nesprin-2	SYNE2
26.8504	26.6158	25.2442	26.5546	26.8486	26.7637			0.404771	1	-0.485471	-0.954777	0	A0A0A0MRG2;E9PG40;P05067;H7C0V9	A0A0A0MRG2;E9PG40;P05067;H7C0V9	Amyloid beta A4 protein;N-APP;Soluble APP-alpha;Soluble APP-beta;C99;Beta-amyloid protein 42;Beta-amyloid protein 40;C83;P3(42);P3(40);C80;Gamma-secretase C-terminal fragment 59;Gamma-secretase C-terminal fragment 57;Gamma-secretase C-terminal fragment 50;C31	APP
30.2869	30.8772	27.7627	29.8481	29.7982	29.7754			0.0598309	1	-0.164953	-0.17266	0	A0A0A0MRJ6;P22061;F6S8N6;A0A3F2YNX8;F8WDT3;F8WAV5;F8WAX2;H7C4X2;C9J0F2	A0A0A0MRJ6;P22061;F6S8N6;A0A3F2YNX8	Protein-L-isoaspartate O-methyltransferase;Protein-L-isoaspartate(D-aspartate) O-methyltransferase	PCMT1
27.7221	27.7352	26.8382	27.4424	27.3231	27.3544			0.0684058	1	0.0585575	0.195859	0	A0A0A0MRM8;A0A1Y0BRN3;A0A590UJ40;E7EW20;Q9UM54;A0A590UKB0;A0A590UJ75;A0A0D9SGC1;A0A590UK22;A0A590UK86;A0A590UK71;A0A5F9ZI03;A0A590UJY4;A0A590UJW9	A0A0A0MRM8;A0A1Y0BRN3;A0A590UJ40;E7EW20;Q9UM54;A0A590UKB0;A0A590UJ75;A0A0D9SGC1;A0A590UK22;A0A590UK86;A0A590UK71;A0A5F9ZI03;A0A590UJY4	Unconventional myosin-VI	MYO6
28.9477	28.5122	24.7023	28.8657	28.4247	27.9328			0.301645	1	-1.02031	-0.741999	0	A0A0A0MRM9;Q14978;S4R349;S4R402;S4R341;S4R3C2	A0A0A0MRM9;Q14978;S4R349	Nucleolar and coiled-body phosphoprotein 1	NOLC1
29.7258	29.0946	28.6333	30.2455	29.6402	29.906			1.0107	0.317584	-0.779335	-2.15378	0	P09234;A0A0A0MRR7;Q5TAL2	P09234;A0A0A0MRR7	U1 small nuclear ribonucleoprotein C	SNRPC
27.1092	26.2642	24.7528	26.4881	26.7786	27.0168			0.43651	1	-0.71908	-1.01856	0	B6VEX4;A0A0A0MRT6;Q8IZP0;E9PEZ7;E7EW77;E7EP65;A0A0C4DG21;A0A7D9NKC8;F8WAL6;Q9NYB9	B6VEX4;A0A0A0MRT6;Q8IZP0	Abl interactor 1	ABI1
26.8461	27.6865	24.998	27.111	27.0137	26.6787			0.203444	1	-0.424253	-0.527149	0	A0A0A0MRW6;Q9H6R4	A0A0A0MRW6;Q9H6R4	Nucleolar protein 6	NOL6
26.8541	27.7619	26.7094	26.9084	26.6572	26.7441			0.428839	1	0.33858	1.0032	0	A0A6I8PIQ6;A0A0A0MS45;J3KNI1;Q9H9E3;H3BMV9;H3BSD2;J3KRB5;J3QLW1;E9PRT5	A0A6I8PIQ6;A0A0A0MS45;J3KNI1;Q9H9E3	Conserved oligomeric Golgi complex subunit 4	COG4
30.4123	30.7709	28.5413	30.7533	31.0353	30.7731			0.608314	0.775897	-0.945779	-1.35659	0	A0A0A0MS51;A0A0A0MT01;P06396;A0A0U1RQL8	A0A0A0MS51;A0A0A0MT01;P06396	Gelsolin	GSN
26.4305	25.6561	24.9568	25.667	25.738	25.8222			0.0490972	1	-0.0612577	-0.143134	0	A0A0A0MSB8;Q9UPT5;A0A0A0MRE1;B4DJ07;B5MCY9;K7ERQ5;C9JME6;C9JKC2	A0A0A0MSB8;Q9UPT5;A0A0A0MRE1;B4DJ07	Exocyst complex component 7	EXOC7
30.7039	31.0356	29.0196	31.007	30.9604	30.9654			0.508161	0.949983	-0.724571	-1.16063	0	A0A0A0MSS8;P42330;S4R3Z2;S4R3D5;P17516;A0A3B3IRI8	A0A0A0MSS8;P42330;S4R3Z2	Aldo-keto reductase family 1 member C3	AKR1C3
28.8326	29.2959	27.8153	28.89	29.2427	29.2084			0.443022	1	-0.465743	-1.03157	0	A0A0A0MSW4;P48739;B3KYB7;B3KYB6	A0A0A0MSW4;P48739;B3KYB7	Phosphatidylinositol transfer protein beta isoform	PITPNB
26.9598	27.8994	25.1346	26.6002	26.917	26.4815			0.000635344	1	-0.00160217	-0.00194915	0	A0A0A0MT32;P38571;Q5T073	A0A0A0MT32;P38571	Lysosomal acid lipase/cholesteryl ester hydrolase	LIPA
28.3218	28.0823	27.5464	28.296	28.241	28.6806			0.721703	0.57239	-0.422351	-1.57757	0	A0A0A0MT83;P26440;A0A0S2Z4K7;H0YLC3;H7C4G6;H0YKV0;H0YN10;A0A087WVD3	A0A0A0MT83;P26440;A0A0S2Z4K7;H0YLC3;H7C4G6	Isovaleryl-CoA dehydrogenase, mitochondrial	IVD
27.0988	27.6727	25.8939	26.7759	26.8954	27.2714			0.0587201	1	-0.0924479	-0.16963	0	A0A0A0MTB8;Q8NI36	A0A0A0MTB8;Q8NI36	WD repeat-containing protein 36	WDR36
28.2368	29.1102	24.8374	28.5936	28.3404	28.1907			0.304943	1	-0.98011	-0.748972	0	A0A0A0MTH3;Q13418;A0A087WWY6;E9PQ52;A0A087WW45	A0A0A0MTH3;Q13418	Integrin-linked protein kinase	ILK
26.1844	27.201	24.5673	26.3907	27.0555	26.6882			0.38756	1	-0.727254	-0.919912	0	Q6PIU2;A0A0A0MTJ9;H7C046	Q6PIU2;A0A0A0MTJ9;H7C046	Neutral cholesterol ester hydrolase 1	NCEH1
26.0722	27.0566	25.7725	27.0203	26.7833	26.766			0.631995	0.744994	-0.556099	-1.40272	0	A0A0A0MTN0;Q13617;Q5T2B5;Q5T2B7	A0A0A0MTN0;Q13617;Q5T2B5	Cullin-2	CUL2
27.255	27.942	26.6795	26.6661	27.2143	26.8416			0.409455	1	0.384841	0.964231	0	Q9Y3B3;A0A0A6YYA0;G3V2Y2	Q9Y3B3;A0A0A6YYA0	Transmembrane emp24 domain-containing protein 7	TMED7;TMED7-TICAM2
29.5283	30.3302	26.8404	30.1278	29.5074	29.7905			0.352972	1	-0.908958	-0.849137	0	A0A0A6YYL2;P0DMN0;P0DMM9;H3BPL6;A0A7I2V2T5;E9PKW4;H3BNY7;H3BRT0	A0A0A6YYL2;P0DMN0;P0DMM9	Sulfotransferase;Sulfotransferase 1A4;Sulfotransferase 1A3	SULT1A4;SULT1A3
29.1744	30.1151	28.6428	29.5926	29.5034	29.4439			0.177808	1	-0.202538	-0.468168	0	A0A0A6YYL4;P57737;I3L167;E7EP81;I3L426;I3L359;I3L1U7;I3L0X9;I3L3T0;I3L2Y6;I3L1M1;I3NI06;I3L212;I3L1G9;Q9Y3D7	A0A0A6YYL4;P57737;I3L167	Coronin;Coronin-7	CORO7-PAM16;CORO7
27.5475	27.8105	26.8263	27.5515	27.5387	27.6621			0.253178	1	-0.189329	-0.637876	0	A0A0B4J1W3;Q9BXJ9;Q6N069	A0A0B4J1W3;Q9BXJ9	N-alpha-acetyltransferase 15, NatA auxiliary subunit	NAA15
30.956	31.0012	25.328	30.7521	30.3755	30.1132			0.280362	1	-1.31858	-0.696675	0	A0A0B4J1Z1;C9JAB2;Q16629	A0A0B4J1Z1;C9JAB2;Q16629	Serine/arginine-rich splicing factor 7	SRSF7
27.4348	28.1497	26.7011	26.7309	27.3649	27.3092			0.250269	1	0.293478	0.631517	0	A0A0B4J2A0;Q9UHJ6	A0A0B4J2A0;Q9UHJ6	Sedoheptulokinase	TRPV1;SHPK
30.965	31.687	30.0356	31.2315	31.425	31.8112			0.512611	0.94218	-0.593362	-1.16939	0	Q5W0H4;A0A0B4J2C3;P13693;J3KPG2;E9PJF7;H0YCX0;Q56UQ5	Q5W0H4;A0A0B4J2C3;P13693;J3KPG2;E9PJF7	Translationally-controlled tumor protein	TPT1
27.3435	27.5511	26.9838	27.4915	27.594	27.8251			0.826814	0.442342	-0.344039	-1.78393	0	A0A0B4J2E5;Q15269;C9J544	A0A0B4J2E5;Q15269	Periodic tryptophan protein 2 homolog	PWP2
27.2673	27.9614	27.2999	27.2079	26.2028	24.358			0.852657	0.415325	1.58664	1.83511	0	A0A0C4DFM1;Q92544;F8WCN2;F2Z2L1	A0A0C4DFM1;Q92544	Transmembrane 9 superfamily member 4	TM9SF4
29.0188	29.2657	27.5222	29.0366	28.9127	29.3153			0.363897	1	-0.485984	-0.871601	0	P43490;A0A0C4DFS8;A0A7P0T9I9;A0A7P0T8L3;A0A7P0T973;A0A7P0TAS5;A0A7P0T931;A0A7P0T8D2;A0A7P0T895;A0A7P0T862;A0A7P0TBB7;A0A7P0TA73;A0A7P0T941;A0A7P0Z466;B7Z8W6;A0A7P0T8R4;A0A7P0Z4N0;A0A7P0T9F0;A0A7P0TB17;A0A7P0T8Z3;A0A7P0TAI8	P43490;A0A0C4DFS8;A0A7P0T9I9;A0A7P0T8L3;A0A7P0T973;A0A7P0TAS5;A0A7P0T931;A0A7P0T8D2;A0A7P0T895;A0A7P0T862;A0A7P0TBB7;A0A7P0TA73;A0A7P0T941;A0A7P0Z466;B7Z8W6	Nicotinamide phosphoribosyltransferase	NAMPT
28.4505	28.8777	27.4835	28.9844	28.8577	28.6546			0.592807	0.807013	-0.561654	-1.32636	0	Q12959;A0A0C4DFT3;A0A590UJC5;A0A590UJ08;A0A590UJD9;A0A590UJS9;A0A590UKA8;A0A590UJR5;A0A590UJ18;A0A590UJ68;A0A590UJ81;A0A590UK48;A0A590UJ29;A0A590UK81;A0A590UJR4;A0A590UJX2;C9JUA9;A0A590UJ64;E7EQD7;A0A590UK02;A0A590UJL2;A0A590UK70;A0A590UJ25;B4E2H8;Q15700;A0A3B3ISW2;F8VYC1;B7Z2T4;E9PN83;E9PIW2;A0A590UJZ4;B5MCC5;H7C325;A0A590UK52;A0A590UJ95;C9JN61;C9JCP6;A8MUT6;F8W750;H7C166;C9IYP1;A0A590UJ86;B7Z3U…	Q12959;A0A0C4DFT3;A0A590UJC5;A0A590UJ08;A0A590UJD9;A0A590UJS9;A0A590UKA8;A0A590UJR5;A0A590UJ18;A0A590UJ68;A0A590UJ81;A0A590UK48;A0A590UJ29;A0A590UK81;A0A590UJR4;A0A590UJX2;C9JUA9;A0A590UJ64;E7EQD7;A0A590UK02;A0A590UJL2	Disks large homolog 1	DLG1
26.9992	27.5815	26.1869	26.4695	26.4522	26.6947			0.393356	1	0.383753	0.931676	0	A0A0C4DFX9;Q9H3P2;H0Y3X6;C9JHL4;H7C0W2;C9JEM7;H7C2C7;F8W954;F8WF98;H7C2M8;H7C3C2	A0A0C4DFX9;Q9H3P2;H0Y3X6;C9JHL4	Negative elongation factor A	NELFA
32.5972	33.0887	31.1791	32.6276	32.5295	32.4686			0.166424	1	-0.253564	-0.441493	0	C9J9K3;A0A0C4DG17;P08865	C9J9K3;A0A0C4DG17;P08865	40S ribosomal protein SA	RPSA
26.6918	27.4664	24.1197	26.773	26.93	26.8755			0.308934	1	-0.766874	-0.757389	0	Q5JZ07;A0A804HIE6;A0A0C4DG76;Q9BQS7;Q5JZ08;A0A804HKF4;A0A804HK72;A0A804HJ98;E7ES21;A0A804HJ33	Q5JZ07;A0A804HIE6;A0A0C4DG76;Q9BQS7;Q5JZ08;A0A804HKF4;A0A804HK72;A0A804HJ98;E7ES21	Hephaestin	HEPH
28.8753	28.7344	28.36	28.8833	28.9952	28.9267			0.820729	0.44905	-0.278498	-1.77191	0	A0A0C4DG89;Q7L014;D6RJA6;H0Y9U3	A0A0C4DG89;Q7L014	Probable ATP-dependent RNA helicase DDX46	DDX46
27.3696	28.1326	26.5921	27.1361	26.8209	27.2997			0.235286	1	0.279151	0.598548	0	A0A0C4DGA2;O75521;F1LLU7;F8WAW4;F8W6J1;C9JB63	A0A0C4DGA2;O75521	Enoyl-CoA delta isomerase 2, mitochondrial	ECI2
27.325	26.1122	26.3187	28.2364	27.1214	26.7108			0.582728	0.82686	-0.77093	-1.30669	0	A0A0C4DGE4;A0A286YF28;A0A0J9YW33;Q13277	A0A0C4DGE4;A0A286YF28;A0A0J9YW33;Q13277	Syntaxin-3	STX3
27.648	27.2602	27.4124	27.6655	27.8042	27.5965			0.903858	0.379096	-0.24848	-1.93719	0	Q14839;A0A2R8YFD8;A0A2R8Y425;A0A2R8Y5J0;A0A2U3TZM0;A0A2R8YFK9;F5GWX5;A0A2R8Y212;A0A2R8Y521;A0A0C4DGG9;A0A2R8YDJ9;A0A2R8YD40;A0A2R8YDW2;A0A2R8Y4X2;A0A2R8Y445;A0A2R8Y8C1;A0A2R8YER1;A0A2R8Y5Z7;A0A2R8Y685;A0A2R8Y7I0;A0A2R8Y7M9;A0A2R8Y8B3;A0A2R8Y5M9;A0A2R8YE38;F2Z2R5;H7C0J3;H7C3H7;I3L229;F6T542;F5H6N4;A0A2R8Y6G9	Q14839;A0A2R8YFD8;A0A2R8Y425;A0A2R8Y5J0;A0A2U3TZM0;A0A2R8YFK9;F5GWX5;A0A2R8Y212;A0A2R8Y521;A0A0C4DGG9;A0A2R8YDJ9;A0A2R8YD40;A0A2R8YDW2;A0A2R8Y4X2;A0A2R8Y445;A0A2R8Y8C1;A0A2R8YER1;A0A2R8Y5Z7;A0A2R8Y685;A0A2R8Y7I0	Chromodomain-helicase-DNA-binding protein 4	CHD4
29.8237	29.7597	28.6664	29.918	29.921	30.348			0.736759	0.547198	-0.645725	-1.60699	0	A0A0C4DGQ5;P04632;K7ELJ7;A0A075B7C0;U3KQE2;K7EM73;K7EIV0;K7EKD8;U3KPR7;K7EMQ1;K7ES78;Q96L46	A0A0C4DGQ5;P04632;K7ELJ7;A0A075B7C0;U3KQE2;K7EM73;K7EIV0;K7EKD8	Calpain small subunit 1	CAPNS1
27.7165	28.3078	27.325	27.8627	28.2138	27.9031			0.275275	1	-0.210136	-0.685753	0	P39656;A0A0C4DGS1;U3KQ84	P39656;A0A0C4DGS1;U3KQ84	Dolichyl-diphosphooligosaccharide--protein glycosyltransferase 48 kDa subunit	DDOST
30.3508	30.7322	28.8741	30.3543	30.3134	30.2167			0.210944	1	-0.309113	-0.544141	0	A0A0D9SG12;A0A2R8YFS5;O00571;A0A0D9SF53;A0A2R8YF78;A0A0D9SFB3;A0A2R8Y4A4;A0A2R8YCW1;A0A2R8Y645;A0A2U3TZJ9;A0A2R8Y5G6;A0A2R8YFR4;F6S8Q4;A0A2R8YDT5;A0A2R8Y7T2;A0A2R8YDH3;O15523;A0A0J9YVQ7;A0A087WVZ1;C9J081;C9J8G5;A0A2R8Y650;A0A2R8YCU0;Q9NQI0;A0A2R8Y4D2;D6RCM4;H0Y960;A0A087WX09;A0A2R8Y770	A0A0D9SG12;A0A2R8YFS5;O00571;A0A0D9SF53;A0A2R8YF78;A0A0D9SFB3;A0A2R8Y4A4;A0A2R8YCW1;A0A2R8Y645;A0A2U3TZJ9;A0A2R8Y5G6;A0A2R8YFR4;F6S8Q4;A0A2R8YDT5;A0A2R8Y7T2;A0A2R8YDH3;O15523	ATP-dependent RNA helicase DDX3X;ATP-dependent RNA helicase DDX3Y	DDX3X;DDX3Y
27.0131	28.0546	26.0522	27.3514	27.3566	27.1958			0.170079	1	-0.261319	-0.45009	0	Q92614;A0A0D9SFK2;H0YEV9	Q92614;A0A0D9SFK2	Unconventional myosin-XVIIIa	MYO18A
29.7598	30.7017	29.0745	30.0798	30.4535	29.9792			0.263286	1	-0.325476	-0.659867	0	A0A0D9SFP2;E9PF18;Q16836;A0A1W2PNM1;A0A0A0MSE2;A0A1W2PQ78;A0A804HLB5;A0A1W2PQV5;A0A804HKJ2;A0A1W2PQC2;A0A1W2PRT2;A0A804HJW7;A0A1W2PQ55;A0A804HJK7;A0A1W2PP40	A0A0D9SFP2;E9PF18;Q16836;A0A1W2PNM1;A0A0A0MSE2;A0A1W2PQ78;A0A804HLB5;A0A1W2PQV5;A0A804HKJ2	Hydroxyacyl-coenzyme A dehydrogenase, mitochondrial	HADH
28.5944	29.2857	26.0094	28.7905	28.5481	28.7076			0.290902	1	-0.718898	-0.719195	0	A0A0D9SFS3;E9PDF2;E9PCR7;Q02218;E9PFG7;C9J4G7;Q9ULD0	A0A0D9SFS3;E9PDF2;E9PCR7;Q02218;E9PFG7	2-oxoglutarate dehydrogenase, mitochondrial	OGDH
26.6005	27.2485	26.0301	26.5262	26.4717	26.9114			0.00874092	1	-0.0100492	-0.0265713	0	A0A0D9SG77;A0A1B0GVL3;Q05086;A0A6Q8PHE5;A0A0D9SES7;A0A0D9SF91;A0A0D9SFU3;A0A0D9SG54;S4R306	A0A0D9SG77;A0A1B0GVL3;Q05086;A0A6Q8PHE5	Ubiquitin-protein ligase E3A	UBE3A
26.6235	25.8462	26.0269	27.0046	27.1585	26.9333			1.62363	0.134435	-0.866584	-3.55046	0	Q8IWS0;A0A0D9SGE8;Q5JRC6	Q8IWS0;A0A0D9SGE8;Q5JRC6	PHD finger protein 6	PHF6
28.9278	29.6443	28.481	29.2206	28.984	28.8566			0.00248382	1	-0.00270081	-0.00760393	0	A0A140T8Z0;A0A0G2JH68;O60610;H9KV28;A0A2R8Y5N1;H7C2W8;B4E2I7;A0A2R8YEF8	A0A140T8Z0;A0A0G2JH68;O60610;H9KV28;A0A2R8Y5N1	Protein diaphanous homolog 1	DIAPH1
32.1436	32.4635	31.1176	32.3474	32.2753	32.4762			0.485867	0.959973	-0.458064	-1.11666	0	A0A0G2JIW1;P0DMV9;P0DMV8;V9GZ37	A0A0G2JIW1;P0DMV9;P0DMV8;V9GZ37	Heat shock 70 kDa protein 1B;Heat shock 70 kDa protein 1A	HSPA1B;HSPA1A
27.242	27.3899	25.3485	26.663	27.1979	26.4113			0.0478223	1	-0.0972843	-0.139589	0	A2ACR1;A0A0G2JJA7;P28065;A2ACR0;A0A0G2JJQ0;A0A0G2JJ13;A0A0G2JHI2	A2ACR1;A0A0G2JJA7;P28065;A2ACR0;A0A0G2JJQ0	Proteasome subunit beta type;Proteasome subunit beta type-9	PSMB9
27.6499	28.1387	27.1556	27.6051	27.1581	27.8344			0.121777	1	0.115534	0.333538	0	H0Y6K2;A0A140T9E9;A0A0G2JK44;P25440;A0A140T9V2;U3KQA6;A0A0G2JHL0;A0A140T9F7;A0A0G2JHN8;A0A140T9I1;E9PIQ3;H0Y799;A0A140T9X8;H0YDJ7;E9PKQ9;U3KPW0	H0Y6K2;A0A140T9E9;A0A0G2JK44;P25440;A0A140T9V2;U3KQA6;A0A0G2JHL0;A0A140T9F7	Bromodomain-containing protein 2	BRD2
27.7409	28.234	25.7742	27.3791	27.6278	27.6159			0.142942	1	-0.291264	-0.385419	0	A0A0G2JNZ2;A0A0G2JPP5;A0A669KB89;Q14160;A0A0G2JMS7;H0YCG0;H0YDF9;A0A669KAX5	A0A0G2JNZ2;A0A0G2JPP5;A0A669KB89;Q14160;A0A0G2JMS7	Protein scribble homolog	SCRIB
30.0957	30.5965	29.2361	30.0612	30.1316	30.171			0.134285	1	-0.145211	-0.364363	0	A0A0J9YYL3;A0A0J9YVP6;A0A0J9YXJ8;A0A0J9YXX5;Q9UHX1;A0A0J9YVR6;A0A0J9YWM1;H0YEM1;E9PN18;E9PMU7;E9PL19;H0YCP8	A0A0J9YYL3;A0A0J9YVP6;A0A0J9YXJ8;A0A0J9YXX5;Q9UHX1;A0A0J9YVR6;A0A0J9YWM1;H0YEM1	Poly(U)-binding-splicing factor PUF60	PUF60
28.8571	29.1301	24.9142	29.0897	29.131	29.1081			0.469086	0.985273	-1.47578	-1.08343	0	A0A0J9YWB6;Q9Y5B0;A0A0J9YWJ4;K7EJD2;A0A0A0MR03	A0A0J9YWB6;Q9Y5B0;A0A0J9YWJ4;K7EJD2	RNA polymerase II subunit A C-terminal domain phosphatase	CTDP1
31.3455	31.2312	30.7883	31.4681	31.3351	31.5811			0.857388	0.416366	-0.339754	-1.8445	0	P43243;A8MXP9;A0A0R4J2E8;D6REM6;D6R991;B3KM87;H0Y8T4;D6RE02;D6RIA2;D6RBI2;D6R8Z5;D6REK4;D6RCM3;A0A1B0GX04;D6RBK5;D6RBS2;D6RAY2;D6RAM9;D6R9F3;D6RB45	P43243;A8MXP9;A0A0R4J2E8;D6REM6;D6R991	Matrin-3	MATR3
26.4023	26.8301	26.936	27.2288	26.305	26.5123			0.0429337	1	0.0407867	0.12592	0	A0A0R4J2F3;P0DPB6	A0A0R4J2F3;P0DPB6
26.2542	26.5237	24.4171	25.9443	25.7995	25.9629			0.0915724	1	-0.170584	-0.25695	0	E3W994;A0A0U1RQI6;A0A804HJG7;E7ERI8;E7EW49;J3KR49;O75122;C9J668;H7C4I5;D6RBU8;B3KR06;E7ENG2	E3W994;A0A0U1RQI6;A0A804HJG7;E7ERI8;E7EW49;J3KR49;O75122	CLIP-associating protein 2	CLASP2
27.0386	27.4529	26.5737	27.4397	27.4689	27.2445			0.618208	0.760783	-0.362591	-1.37587	0	A0A0U1RRL5;P32519	A0A0U1RRL5;P32519	ETS-related transcription factor Elf-1	ELF1
26.7083	27.5176	26.8221	27.4018	27.5294	27.2115			0.607553	0.778667	-0.364878	-1.3551	0	A0A0U1RRM1;Q8WXI9;A0A0U1RR30;A0A0U1RRK3;A0A0U1RR34	A0A0U1RRM1;Q8WXI9;A0A0U1RR30	Transcriptional repressor p66-beta	GATAD2B
31.9657	32.1227	31.1952	31.9872	32.0011	32.1696			0.425368	1	-0.291424	-0.996238	0	A0A0U1RRM4;P26599;A0A7I2V621;A6NLN1;A0A7I2V4H6;A0A6Q8PEX4;K7EKJ7;A0A0D9SF20;K7EK45;K7ES59;K7ELW5;A0A087WU68;A0A087WUW5	A0A0U1RRM4;P26599;A0A7I2V621;A6NLN1;A0A7I2V4H6;A0A6Q8PEX4	Polypyrimidine tract-binding protein 1	PTBP1
27.4744	25.7201	24.685	27.2463	27.5006	27.917			0.887623	0.39449	-1.59476	-1.90472	0	Q53Z42;A0A140T9I0;A0A140T9X5;A0A140T913;A0A140T955;A0A140T933;A0A1W2PPQ2;A0A1W2PRT9;A0A140T975;A0A140T941;A0A1W2PQS8;Q9GJ45;A0A1W2PS39;A0A140T9Z6;Q5RJ27;B0UXQ0	Q53Z42;A0A140T9I0;A0A140T9X5;A0A140T913;A0A140T955;A0A140T933;A0A1W2PPQ2;A0A1W2PRT9;A0A140T975;A0A140T941;A0A1W2PQS8;Q9GJ45;A0A1W2PS39;A0A140T9Z6;Q5RJ27;B0UXQ0		HLA-A
25.8254	27.1891	25.7646	26.5376	26.7575	26.8974			0.421456	1	-0.47112	-0.988384	0	A0A140TA76;Q8ND56;A0A0G2JQ95;A0A096LP11;K7EMZ9	A0A140TA76;Q8ND56;A0A0G2JQ95;A0A096LP11	Protein LSM14 homolog A	LSM14A
26.173	27.0567	24.8555	25.8787	26.0633	26.8289			0.118464	1	-0.228546	-0.325289	0	A0A1B0GTY1;A0A1B0GUC3;A0A1B0GV98;A0A1B0GTC5;A0A1B0GU26;A0A1B0GTC3;A0A1B0GVH5;Q9C0B1;A0A1B0GTI3	A0A1B0GTY1;A0A1B0GUC3;A0A1B0GV98;A0A1B0GTC5;A0A1B0GU26;A0A1B0GTC3;A0A1B0GVH5;Q9C0B1	Alpha-ketoglutarate-dependent dioxygenase FTO	FTO
29.6038	29.7693	28.745	29.8089	29.9136	29.7816			0.652993	0.711514	-0.461971	-1.44362	0	P49419;A0A1B0GW77;A0A1B0GTG2;A0A1B0GW82;A0A1B0GUA1;A0A1B0GTJ4;A0A1B0GTY9;A0A1B0GV49;A0A1B0GUY0;A0A0J9YWF7;H0YHM6;F8VVF2;A0A1B0GVU0;F8WDY6;A0A0J9YWM6;F8WD33;A0A1B0GW65;A0A0J9YWK1	P49419;A0A1B0GW77;A0A1B0GTG2;A0A1B0GW82;A0A1B0GUA1;A0A1B0GTJ4;A0A1B0GTY9;A0A1B0GV49;A0A1B0GUY0;A0A0J9YWF7	Alpha-aminoadipic semialdehyde dehydrogenase	ALDH7A1
27.9214	28.4629	26.8838	28.0326	28.3228	27.989			0.307924	1	-0.35875	-0.755262	0	A0A1B0GTU4;P49023;F5GZ78;A0A1B0GU60;F5H836;A0A1B0GV30	A0A1B0GTU4;P49023;F5GZ78	Paxillin	PXN
28.3474	28.3534	27.8449	28.4928	28.598	28.443			0.878641	0.401025	-0.329386	-1.8868	0	A0A3B3ITE1;A0A1B0GTW1;A0A2R8YDH4;Q9UDY2;A0A3B3IRI3;A0A3B3ISZ5;A0A3B3IU51;A0A3B3ISF1;A0A3B3IRV6;A0A3B3IT83;A0A3B3IS03;U3KQJ2;A0A3B3IU26;B1AN86	A0A3B3ITE1;A0A1B0GTW1;A0A2R8YDH4;Q9UDY2;A0A3B3IRI3;A0A3B3ISZ5;A0A3B3IU51;A0A3B3ISF1;A0A3B3IRV6;A0A3B3IT83;A0A3B3IS03	Tight junction protein ZO-2	TJP2
27.7405	28.5669	25.1833	27.3865	28.1243	27.6839			0.211654	1	-0.568001	-0.545743	0	A0A1B0GTW6;A0A0C4DH22;Q9H4G0;X6RC15;Q4VXN5;H0Y482;Q4VXN6	A0A1B0GTW6;A0A0C4DH22;Q9H4G0	Band 4.1-like protein 1	EPB41L1
28.2557	28.7494	27.4618	28.3175	28.2669	28.1972			0.100002	1	-0.104957	-0.278652	0	A0A1B0GUA3;Q96EK5;A0A6Q8PHL8;A0A6Q8PGG2;A0A6Q8PH45;A0A1B0GUH6;A0A0D9SFK7;A0A1B0GTE6;A0A1B0GW21;A0A1B0GTX3;A0A6Q8PH08;A0A1B0GU96;A0A6Q8PHE6;A0A1B0GTE2;A0A1B0GVY9	A0A1B0GUA3;Q96EK5;A0A6Q8PHL8;A0A6Q8PGG2;A0A6Q8PH45;A0A1B0GUH6;A0A0D9SFK7	KIF1-binding protein	KIAA1279;KIF1BP
28.1698	28.4435	25.2118	28.8828	28.6304	28.5897			0.616643	0.763406	-1.42592	-1.37282	0	A0A1B0GUW4;Q13510;A0A1B0GUE3;A0A1B0GUH5;A0A1B0GTZ5;A0A1B0GTM3;A0A1B0GUA4;A0A1B0GW68;E7EMM4;A0A1B0GTP7;A0A1B0GV06;A0A1B0GUG1;A0A1B0GUB3;A0A1B0GW66;A0A1B0GVG2;A0A1B0GU06;A0A1B0GU62;A0A1B0GVE7;A0A1B0GVJ1;A0A1B0GW48;A0A1B0GUJ3;A0A1B0GV95;A0A1B0GVA3	A0A1B0GUW4;Q13510;A0A1B0GUE3;A0A1B0GUH5;A0A1B0GTZ5;A0A1B0GTM3;A0A1B0GUA4;A0A1B0GW68;E7EMM4;A0A1B0GTP7;A0A1B0GV06;A0A1B0GUG1	Acid ceramidase;Acid ceramidase subunit alpha;Acid ceramidase subunit beta	ASAH1
30.8432	31.5581	29.9408	31.145	31.4072	31.3299			0.468431	0.984973	-0.513299	-1.08213	0	A0A1B0GVD5;A0A1B0GWE8;P07339;F8W787;A0A1B0GW44;A0A1B0GV23;C9JH19;A0A1B0GU92;A0A1B0GU03;A0A1B0GVP3;H7C469;F8WD96;A0A1B0GVF1	A0A1B0GVD5;A0A1B0GWE8;P07339;F8W787;A0A1B0GW44;A0A1B0GV23;C9JH19;A0A1B0GU92;A0A1B0GU03;A0A1B0GVP3;H7C469;F8WD96	Cathepsin D;Cathepsin D light chain;Cathepsin D heavy chain	CTSD
28.0929	28.132	26.093	27.9191	28.0951	28.0636			0.362405	1	-0.586642	-0.868539	0	A0A1B0GVF3;P23786;A0A1B0GV75;A0A1B0GTB8;A0A1B0GWC0;A0A1B0GTM0;A0A1B0GUD9;A0A1B0GTL9;A0A1B0GUB8	A0A1B0GVF3;P23786;A0A1B0GV75;A0A1B0GTB8;A0A1B0GWC0	Carnitine O-palmitoyltransferase 2, mitochondrial	CPT2
26.9477	28.0376	25.9906	27.018	27.3329	27.3899			0.158654	1	-0.254927	-0.423101	0	A0A1B0GVZ4;P06132;Q5T446;A0A1B0GVN9;A0A494C085;A0A494C007;H0Y5R6;A0A494BZY8;A0A494C0Q8;A0A494C1D8;A0A494C0S8;A0A494C0P4;A0A494C1T3	A0A1B0GVZ4;P06132;Q5T446;A0A1B0GVN9;A0A494C085;A0A494C007;H0Y5R6;A0A494BZY8;A0A494C0Q8	Uroporphyrinogen decarboxylase	UROD
27.0374	26.5089	25.2248	26.6139	26.7027	26.8173			0.348074	1	-0.454236	-0.839029	0	R4GND1;A0A1B0GX65;Q96LR5;Q969T4;A0A087X283;C9J2P0;H7C061;B7Z306;P51965;R4GN77;C9J180	R4GND1;A0A1B0GX65;Q96LR5;Q969T4;A0A087X283;C9J2P0;H7C061;B7Z306;P51965;R4GN77	Ubiquitin-conjugating enzyme E2 E2;Ubiquitin-conjugating enzyme E2 E3;Ubiquitin-conjugating enzyme E2 E1	UBE2E3;UBE2E2;UBE2E1
30.7454	31.0765	30.0981	31.0759	31.168	31.0768			0.741345	0.538532	-0.466897	-1.61596	0	A0A1C7CYX9;Q16555;E5RFU4;D6RF19	A0A1C7CYX9;Q16555	Dihydropyrimidinase-related protein 2	DPYSL2
27.0411	27.6587	24.5271	26.7985	26.9232	26.9677			0.195199	1	-0.487495	-0.508336	0	Q9BWM7;A0A1P0AYU5;S4R3N9	Q9BWM7;A0A1P0AYU5;S4R3N9	Sideroflexin-3	SFXN3
28.8715	29.4739	27.9045	28.8466	28.6749	28.942			0.0528409	1	-0.0711816	-0.153496	0	A0A1W2PNX8;Q9H3U1	A0A1W2PNX8;Q9H3U1	Protein unc-45 homolog A	UNC45A
27.7115	27.418	27.1792	27.6093	27.8327	28.1101			0.915621	0.37484	-0.414454	-1.96079	0	A0A1W2PQT3;A0A1W2PPH1;A0A1W2PQH3;A0A1W2PQY8;P23368;A0A1W2PQ37;A0A1W2PQF8;A0A1W2PR68;A0A1W2PRS2;A0A1W2PRY9;A0A1W2PQH4;A0A1W2PPY2;A0A1W2PRH1;Q6TCH8	A0A1W2PQT3;A0A1W2PPH1;A0A1W2PQH3;A0A1W2PQY8;P23368;A0A1W2PQ37;A0A1W2PQF8;A0A1W2PR68	NAD-dependent malic enzyme, mitochondrial	ME2
29.2153	29.2142	27.5765	29.2653	28.909	29.2448			0.350399	1	-0.471003	-0.84383	0	A0A1W2PPX5;A0A1W2PQR6;A0A1W2PQB7;A0A1W2PS43;A0A1W2PRS1;Q14108;A0A1W2PRF6;A0A1W2PPU6;A0A1W2PSE4	A0A1W2PPX5;A0A1W2PQR6;A0A1W2PQB7;A0A1W2PS43;A0A1W2PRS1;Q14108;A0A1W2PRF6;A0A1W2PPU6	Lysosome membrane protein 2	SCARB2
29.3516	28.3985	28.5124	29.5826	29.7804	29.6045			1.37159	0.162533	-0.901685	-2.93733	0	A0A1W2PPZ5;P23193;A0A1W2PRL9;E5RIS7;E5RJ93;B7Z4S1;E5RK46;A0A1W2PS15;E5RFI1;A0A1W2PPV7;Q5JRI7;A0A0A0MT58;Q15560	A0A1W2PPZ5;P23193;A0A1W2PRL9;E5RIS7	Transcription elongation factor A protein 1	TCEA1
31	31.2425	29.8374	30.8006	30.9431	31.0084			0.196621	1	-0.224063	-0.511591	0	A0A1X7SBZ2;A0A5H1ZRQ2;Q92841;A0A0U1RQJ0	A0A1X7SBZ2;A0A5H1ZRQ2;Q92841	Probable ATP-dependent RNA helicase DDX17	DDX17
31.929	32.1713	31.3594	31.7715	31.7205	31.8858			0.0376674	1	0.0272719	0.111055	0	A0A286YF22;O43175;A0A2C9F2M7;A0A286YFA2;A0A286YFL2;A0A286YFM8;A0A286YF78;A0A286YFC8;A0A286YFB2;A0A286YER3;A0A286YF34;A0A286YFF3;A0A286YFE1;A0A286YFK5	A0A286YF22;O43175;A0A2C9F2M7;A0A286YFA2;A0A286YFL2	D-3-phosphoglycerate dehydrogenase	PHGDH
29.6625	30.4606	28.9447	30.1459	30.5857	30.9475			0.813228	0.45878	-0.87041	-1.75711	0	Q9UK22;A0A286YF37;R4GNH2	Q9UK22;A0A286YF37	F-box only protein 2	FBXO2
28.1897	29.0677	26.9468	26.8286	27.2014	27.0375			0.770902	0.503901	1.04559	1.67386	0	A0A286YFD6;P31350;A0A7P0SBL1;A0A0C4DGZ6;H0YAV1	A0A286YFD6;P31350;A0A7P0SBL1	Ribonucleoside-diphosphate reductase subunit M2	RRM2
29.8369	29.9562	25.7918	29.6963	29.9742	30.1089			0.436017	1	-1.39818	-1.01757	0	A0A2C9F2P4;A0A286YFF7;P50897;Q5T0S4;A0A286YFE3;A0A286YFL8;E9PK48;E9PIA8;A0A286YFL6;E9PSE5	A0A2C9F2P4;A0A286YFF7;P50897;Q5T0S4;A0A286YFE3;A0A286YFL8	Palmitoyl-protein thioesterase 1	PPT1
27.612	28.2063	25.2401	26.959	26.7701	27.5929			0.0315191	1	-0.0878633	-0.0935091	0	A0A2Q3DQE3;H0Y6G2;Q13555;Q8WU40;Q5SWX3;H7BXS4;E9PBE8;E7EQE4	A0A2Q3DQE3;H0Y6G2;Q13555;Q8WU40;Q5SWX3	Calcium/calmodulin-dependent protein kinase type II subunit gamma	CAMK2G
27.1393	27.2508	24.6558	27.0198	27.1626	26.9111			0.330639	1	-0.682545	-0.802862	0	P51532;Q9HBD4;A0A2R8Y4P4;A0A2R8Y7S2;A0A2R8YGG3;A0A2R8YGP5;A0A2R8YG32;A0A2R8Y440;A0A2R8Y4C5;A0A2R8Y526;A0A2R8Y7F3;A0A2R8Y6N0;A0A2R8YF80;A0A2R8Y7Y7;A0A2R8YF58;A0A2R8Y6V2;A0A2R8YDA1;A0A2R8Y523;A0A2R8YCY3;A0A2R8Y4R6;A0A2R8YFV8;A0A2R8Y5K3;K7EQF0;A0A2R8YFK5;A0A0U1RRG6;K7EP28	P51532;Q9HBD4;A0A2R8Y4P4;A0A2R8Y7S2;A0A2R8YGG3;A0A2R8YGP5;A0A2R8YG32;A0A2R8Y440;A0A2R8Y4C5;A0A2R8Y526;A0A2R8Y7F3;A0A2R8Y6N0;A0A2R8YF80;A0A2R8Y7Y7;A0A2R8YF58;A0A2R8Y6V2;A0A2R8YDA1	Transcription activator BRG1	SMARCA4
27.008	27.1121	25.4058	27.108	27.0664	27.1185			0.460412	0.996418	-0.589024	-1.06621	0	A0A2R8Y765;J3QKS7;A0A2R8Y7U4;A0A2U3TZQ7;A0A2R8Y7I9;A0A2R8Y4T4;A0A2R8YES3;A0A2R8Y855;B4DGM3;Q969G3;J3QR61;J3KT85;A0A2R8YD78	A0A2R8Y765;J3QKS7;A0A2R8Y7U4;A0A2U3TZQ7;A0A2R8Y7I9;A0A2R8Y4T4;A0A2R8YES3;A0A2R8Y855;B4DGM3;Q969G3;J3QR61	SWI/SNF-related matrix-associated actin-dependent regulator of chromatin subfamily E member 1	SMARCE1
29.1119	29.2119	28.5423	29.3577	29.0344	29.0601			0.348025	1	-0.195406	-0.838927	0	A0A2R8Y804;A0A2R8Y543;A0A2R8YCH5;A0A2R8Y5A3;P35222;B4DGU4;A0A2R8Y7Z0;A0A2R8Y750;A0A2R8Y5Z1;A0A2R8Y5C3;A0A2R8Y6G0;A0A2R8Y815;A0A2R8YG06;C9IZ65	A0A2R8Y804;A0A2R8Y543;A0A2R8YCH5;A0A2R8Y5A3;P35222;B4DGU4;A0A2R8Y7Z0;A0A2R8Y750;A0A2R8Y5Z1;A0A2R8Y5C3;A0A2R8Y6G0	Catenin beta-1	CTNNB1
26.6363	27.2314	24.9937	26.6546	25.8367	26.0928			0.044382	1	0.0924695	0.129982	0	Q15813;A0A2R8Y5Q8;A0A2R8YHI9;A0A2R8Y7E7;A0A2U3TZJ6;A0A2R8YFL4;A0A2R8Y6Q1;A0A2R8YER9;A0A2R8Y4V6;A0A2R8Y809;A0A2R8Y784;A0A2R8YFM3;A0A2R8Y6L2;A0A2R8Y787;A0A2R8Y4P2;A0A2R8Y5H6;A0A2R8Y897;A0A2R8Y4E7;A0A2R8YH53;A0A2R8Y6G3;A0A2R8YF12;A0A2R8Y597;A0A2R8Y7H8;A0A2R8Y3S1	Q15813;A0A2R8Y5Q8;A0A2R8YHI9;A0A2R8Y7E7;A0A2U3TZJ6;A0A2R8YFL4;A0A2R8Y6Q1;A0A2R8YER9;A0A2R8Y4V6;A0A2R8Y809;A0A2R8Y784;A0A2R8YFM3;A0A2R8Y6L2	Tubulin-specific chaperone E	TBCE
27.4097	28.0392	25.0158	26.9159	26.6921	26.7938			0.00746758	1	0.0209885	0.0227328	0	A0A2U3TZL3;A0A2R8Y7Q9;A0A2R8YEK8;A0A2R8Y5S9;Q9Y5P4;A0A2R8YFA1;A0A2R8YE59;A0A2R8Y5H3;A0A2R8YE18;A0A2R8Y7C5;A0A2R8Y773;H0Y9J1;A0A2R8YCI0;A0A2R8YFI2;A0A2R8YEA4	A0A2U3TZL3;A0A2R8Y7Q9;A0A2R8YEK8;A0A2R8Y5S9;Q9Y5P4;A0A2R8YFA1;A0A2R8YE59;A0A2R8Y5H3;A0A2R8YE18;A0A2R8Y7C5	Collagen type IV alpha-3-binding protein	COL4A3BP
31.177	30.7631	30.3453	31.5193	31.3799	31.4618			1.32982	0.179414	-0.691851	-2.84157	0	A0A2R8Y6J3;P46777;Q5T7N0;A0A2R8Y4A2	A0A2R8Y6J3;P46777	60S ribosomal protein L5	RPL5
29.5234	29.6148	28.3626	29.3929	29.6429	29.6003			0.388683	1	-0.378424	-0.922193	0	A0A2R8YDQ9;A0A2R8Y6Y7;Q9P2R7;Q5T9Q5;A0A0U1RQL1;Q5T9Q8;A0A0U1RRI1;A0A0U1RQF8;A0A2R8Y5P6;A0A2R8Y6E6	A0A2R8YDQ9;A0A2R8Y6Y7;Q9P2R7;Q5T9Q5	Succinyl-CoA ligase [ADP-forming] subunit beta, mitochondrial	SUCLA2
31.0936	31.044	30.2365	30.9591	30.7242	31.0618			0.156852	1	-0.123643	-0.418813	0	P62263;A0A2R8Y811;E5RH77	P62263;A0A2R8Y811;E5RH77	40S ribosomal protein S14	RPS14
31.0793	29.3461	29.4799	31.1308	31.3183	31.2307			1.05687	0.296901	-1.25816	-2.24916	0	E7ETK0;A0A2R8Y849;A0A2R8YD14;P62847;A0A2R8Y8A0	E7ETK0;A0A2R8Y849;A0A2R8YD14;P62847	40S ribosomal protein S24	RPS24
28.6922	28.6536	24.3815	28.6755	28.2573	29.1015			0.421934	1	-1.43565	-0.989345	0	A0A2R8Y851;P62273;A0A2R8Y6P7;A0A087WTT6	A0A2R8Y851;P62273;A0A2R8Y6P7;A0A087WTT6	40S ribosomal protein S29	RPS29
28.8711	28.9583	27.4425	28.6256	28.6527	28.414			0.101271	1	-0.140146	-0.281896	0	A0A2R8Y891;P08237;F8VZI0;F8VX13;F8VZQ1;F8VP00;F8VSF7;F8VTQ3;F8VW30;F8VUB8;F8VYK8;F8VVE3	A0A2R8Y891;P08237;F8VZI0	ATP-dependent 6-phosphofructokinase, muscle type	PFKM
28.8546	28.9025	27.5153	28.4101	28.4548	28.7879			0.0965486	1	-0.126797	-0.269793	0	A0A2R8YGD1;A0A2R8YD45;A0A804HJ17;O14773;A0A2R8Y7U1;A0A2R8YDY1;A0A2R8Y7I4	A0A2R8YGD1;A0A2R8YD45;A0A804HJ17;O14773;A0A2R8Y7U1	Tripeptidyl-peptidase 1	TPP1
30.9438	31.3101	29.7205	31.0095	31.0165	30.8468			0.244565	1	-0.299472	-0.619008	0	P51659;A0A2R8YD50;E7EPL9;A0A804HK65;A0A804HKU2;E7ER27;E7ET17;A0A2R8Y7L2;A0A804HIR1;A0A2R8YDT8;A0A2R8YF45;A0A804HK88;A0A804HKB5;A0A804HIG8;A0A2R8Y7W2;A0A2R8YEG2;A0A804HKT2;A0A804HLJ0	P51659;A0A2R8YD50;E7EPL9;A0A804HK65;A0A804HKU2;E7ER27;E7ET17;A0A2R8Y7L2;A0A804HIR1	Peroxisomal multifunctional enzyme type 2;(3R)-hydroxyacyl-CoA dehydrogenase;Enoyl-CoA hydratase 2	HSD17B4
29.2087	29.525	27.2415	28.8162	28.737	29.0511			0.104849	1	-0.209675	-0.291011	0	P68400;E7EU96;A0A2R8YD58;A0A2R8Y5A0;A0A2R8YFU2;A0A2R8YF43;A0A2R8YDP2;Q8NEV1;A0A2R8Y4H0;A0A2R8Y4D6;A0A2R8YEW1;V9GYA2;A0A2R8YDY7;A0A2R8YCK2;A0A2R8Y7T1;A0A2R8YF47;V9GY80;A0A2R8YEL7;A0A2R8Y797;A0A2R8Y3W6;A0A087WY74;V9GYW6;A0A2R8YCC9	P68400;E7EU96;A0A2R8YD58;A0A2R8Y5A0;A0A2R8YFU2;A0A2R8YF43;A0A2R8YDP2;Q8NEV1;A0A2R8Y4H0;A0A2R8Y4D6	Casein kinase II subunit alpha;Casein kinase II subunit alpha 3	CSNK2A1;CSNK2A3
28.6784	28.9303	26.9087	28.8479	28.6447	28.7708			0.383214	1	-0.581989	-0.911073	0	A0A2U3TZM1;A0A2R8YE77;O14936;A0A2U3TZN6;A0A2U3TZM4;A0A7I2RJN6;A0A2R8YEK3;A0A2R8YFN5;Q5JS79;A0A2R8Y6F8;A0A2R8Y3B3;Q5JS72;A0A2R8YEJ7;A0A2R8Y6D8;A0A2R8YGH2;A0A2R8Y4K4	A0A2U3TZM1;A0A2R8YE77;O14936;A0A2U3TZN6;A0A2U3TZM4;A0A7I2RJN6;A0A2R8YEK3;A0A2R8YFN5;Q5JS79;A0A2R8Y6F8;A0A2R8Y3B3	Peripheral plasma membrane protein CASK	CASK
26.148	27.5945	24.2598	27.2712	26.6927	25.8686			0.227969	1	-0.610105	-0.582308	0	A0A2R8YFR7;A0A2R8YF49;Q12774;H0Y895;A0A5F9ZGZ6	A0A2R8YFR7;A0A2R8YF49;Q12774	Rho guanine nucleotide exchange factor 5	ARHGEF5
29.5553	30.4664	28.6076	29.6882	29.8196	29.4951			0.080732	1	-0.124568	-0.228639	0	A0A2R8YFH5;Q15437;Q5QPE2;Q5QPE1;A0A2R8Y633;A0A2R8Y7S7;A0A2R8YF30	A0A2R8YFH5;Q15437;Q5QPE2	Protein transport protein Sec23B	SEC23B
32.0853	32.7458	30.0758	32.472	32.435	32.2174			0.385712	1	-0.739151	-0.916153	0	A0A2U3TZH3;Q05639;A0A2R8Y488;A0A2R8Y660;A0A2R8YDN5;A0A6Q8PFK6	A0A2U3TZH3;Q05639	Elongation factor 1-alpha 2	EEF1A2
28.2816	27.7867	25.1429	28.1659	28.4088	28.8972			0.642627	0.729638	-1.42021	-1.42343	0	E9PNW4;A0A2U3TZL5;P13987;H0YET2	E9PNW4;A0A2U3TZL5;P13987;H0YET2	CD59 glycoprotein	CD59
32.0464	32.1516	31.0772	32.4879	32.5054	32.544			1.03429	0.315387	-0.754035	-2.20237	0	P06744;A0A2U3TZU2;K7EQ48;A0A2R8Y6C7;A0A0J9YYH3;A0A0J9YXP8;A0A0J9YX90;K7ERC6;K7EPY4;K7EP41;K7ENA0;K7ELR7;A0A2R8YF08;A0A0J9YXM3;K7ERK8;K7EIL4;A0A0J9YXH9;K7ESF4;A0A0J9YYI8	P06744;A0A2U3TZU2;K7EQ48;A0A2R8Y6C7;A0A0J9YYH3;A0A0J9YXP8;A0A0J9YX90	Glucose-6-phosphate isomerase	GPI
28.7217	28.6605	26.374	28.5666	28.8722	28.6449			0.42583	1	-0.775792	-0.997165	0	A0A3B3IRI2;P17812;B4E1E0;A0A3B3IRQ8;A0A3B3ITF6;A0A3B3ITB8;A0A3B3ISY3;A0A3B3ITH9	A0A3B3IRI2;P17812;B4E1E0;A0A3B3IRQ8;A0A3B3ITF6;A0A3B3ITB8	CTP synthase 1;CTP synthase	CTPS1
30.9113	30.5507	29.6336	31.5653	31.0033	31.5655			1.12346	0.254226	-1.01285	-2.38892	0	A0A3B3IRR1;A0A3F2YNY7;P08397;F5H0P4;F5H345;A0A3B3IU56;F5GY90;A0A1W2PNU5;A0A3B3IU34;F5H226;F5H4W5;F5H4X2	A0A3B3IRR1;A0A3F2YNY7;P08397;F5H0P4;F5H345;A0A3B3IU56;F5GY90;A0A1W2PNU5;A0A3B3IU34	Porphobilinogen deaminase	HMBS
25.2307	26.2475	24.5375	26.1922	25.8322	25.8407			0.531964	0.916858	-0.616445	-1.2074	0	P06400;A0A3B3IS71;A0A2R8YFL6	P06400;A0A3B3IS71	Retinoblastoma-associated protein	RB1
27.8765	28.3387	27.0313	28.1364	28.0826	28.3899			0.503563	0.949521	-0.454108	-1.15158	0	A0A7I2V3E3;A0A7I2V2P6;A0A3B3ISG5;P14735;A0A7I2YQV5;A0A7I2V610;A0A7I2V4Q3;A0A7I2V2S1;A0A7I2V3K9;A0A7I2V4A4;B3KSB8;A0A7I2YQS6;A0A7I2V612;A0A7I2V373;A0A7I2V634	A0A7I2V3E3;A0A7I2V2P6;A0A3B3ISG5;P14735;A0A7I2YQV5;A0A7I2V610;A0A7I2V4Q3;A0A7I2V2S1;A0A7I2V3K9;A0A7I2V4A4;B3KSB8;A0A7I2YQS6;A0A7I2V612;A0A7I2V373	Insulin-degrading enzyme	IDE
27.6996	28.1127	24.9494	27.5031	26.8057	27.2741			0.0966327	1	-0.273726	-0.270009	0	A0A3B3ISU0;Q02487	A0A3B3ISU0;Q02487	Desmocollin-2	DSC2
26.0569	26.9391	25.2782	25.8165	25.2495	25.4104			0.517169	0.940059	0.599272	1.17835	0	H3BSW0;A0A3B3ISV5;Q8N9N7	H3BSW0;A0A3B3ISV5;Q8N9N7	Leucine-rich repeat-containing protein 57	LRRC57
29.5608	30.1828	25.3609	29.7628	29.5802	29.9287			0.385284	1	-1.38909	-0.915283	0	A0A3B3IU45;A0A3B3IT92;P33991;A0A3B3ITP6;A0A3B3IS57;E5RG31;A0A3B3IRR8	A0A3B3IU45;A0A3B3IT92;P33991;A0A3B3ITP6;A0A3B3IS57;E5RG31	DNA replication licensing factor MCM4	MCM4
27.0607	27.2505	24.6714	27.1835	26.6684	27.1076			0.319489	1	-0.658943	-0.779568	0	Q13884;A0A3B3ITC2;E5RIX7	Q13884;A0A3B3ITC2	Beta-1-syntrophin	SNTB1
28.0494	28.3421	27.3285	28.5605	28.5484	28.2059			0.75704	0.510982	-0.531581	-1.64668	0	A0A3B3ITK7;P36871	A0A3B3ITK7;P36871	Phosphoglucomutase-1	PGM1
25.823	26.0174	24.8961	31.2607	31.4299	32.1345	+	3ha_huvec	3.79481	0.062	-6.0296	-13.787	0	A0A3B3ITT5;P47914	A0A3B3ITT5;P47914	60S ribosomal protein L29	RPL29
28.0161	29.0744	26.0133	28.4105	28.3577	28.4945			0.329731	1	-0.719633	-0.800971	0	A0A3B3ITW3;P28288	A0A3B3ITW3;P28288	ATP-binding cassette sub-family D member 3	ABCD3
29.9316	30.2808	29.7167	29.3967	29.8214	29.0465			0.933389	0.365227	0.554829	1.99654	0	E9PN17;A0A3B3ITX4;O75964;A0A3B3IRW3	E9PN17;A0A3B3ITX4;O75964	ATP synthase subunit g, mitochondrial	ATP5L
29.0473	28.9963	28.2196	28.8801	29.0249	29.2973			0.458858	0.997192	-0.313008	-1.06312	0	A0A3B3ITZ9;Q9Y2W1	A0A3B3ITZ9;Q9Y2W1	Thyroid hormone receptor-associated protein 3	THRAP3
31.4107	31.6874	31.2599	31.4063	31.7633	31.6426			0.391236	1	-0.151407	-0.927376	0	A0A3B3IUA2;B1AHD1;P55769;A0A3B3IRU2;A0A3B3ISH1;A0A3B3ISK4	A0A3B3IUA2;B1AHD1;P55769	NHP2-like protein 1;NHP2-like protein 1, N-terminally processed	NHP2L1
27.4732	28.2853	24.7286	27.7025	27.7173	27.7253			0.340513	1	-0.886028	-0.823383	0	Q13144;A0A3B3IUB1;A0A3B3ITG6;A0A3B3ISX3;A0A3B3ISM8;A0A3B3IUF2;A0A3B3IRP4;A0A3B3ITQ2;A0A3B3IS56;A0A3B3ISV1;A0A3B3ISS1;C9JRD9;A0A3B3ISI2;A0A3B3IST9;A0A3B3ITK8;A0A3B3IT53;H7C2X0	Q13144;A0A3B3IUB1;A0A3B3ITG6;A0A3B3ISX3	Translation initiation factor eIF-2B subunit epsilon	EIF2B5
26.6742	27.1101	25.0644	27.2468	27.5239	27.7115			0.886557	0.393594	-1.21113	-1.90259	0	A0A3B3IUB5;Q8TCT9;A0A075B6F6;A0A0S2Z6F0;A0A3B3IT72;A0A0C4DGU3	A0A3B3IUB5;Q8TCT9;A0A075B6F6;A0A0S2Z6F0;A0A3B3IT72	Minor histocompatibility antigen H13	HM13
28.1542	28.681	27.3395	27.8179	28.2185	28.3246			0.0508399	1	-0.0620855	-0.147966	0	A0A494C0G1;H0Y987;O95394;A0A494C099;A0A087WT27;A0A494C1Q4;J3KN95;A0A494C1E2;A0A494C163;D6RCQ8;D6RF77;D6RCD1;D6RC77;H0Y8I3;D6RIS6;A0A494C076	A0A494C0G1;H0Y987;O95394;A0A494C099;A0A087WT27;A0A494C1Q4;J3KN95;A0A494C1E2;A0A494C163	Phosphoacetylglucosamine mutase	PGM3
27.9259	28.1741	26.8467	27.9148	28.1427	28.488			0.533616	0.915737	-0.532912	-1.21064	0	A0A494C0R8;K7EIG1;I3L2B0;I3L318;Q9Y5I4	A0A494C0R8;K7EIG1;I3L2B0		CLUH
27.7186	28.283	26.0044	27.6068	27.9437	25.8851			0.07112	1	0.190104	0.203133	0	A0A494C108;Q8N9T8;H0YFD2;F8WFC1	A0A494C108;Q8N9T8	Protein KRI1 homolog	KRI1
27.8096	27.745	26.3997	27.4871	27.8806	27.9448			0.397744	1	-0.452737	-0.940568	0	A0A494C1F2;P35658;A0A0A0MSW3;A0A494BZU9;H0Y837;H0YF36;E9PKD2;B7ZAV2;A0A494C0J0;A0A494C104	A0A494C1F2;P35658;A0A0A0MSW3	Nuclear pore complex protein Nup214	NUP214
27.1314	27.2522	25.4958	27.6863	28.0469	27.5363			0.898895	0.381817	-1.13001	-1.92726	0	Q14739;A0A494C1L1;C9JXK0	Q14739;A0A494C1L1;C9JXK0	Lamin-B receptor	LBR
28.1213	28.5315	26.7176	28.3987	28.6999	28.5591			0.615834	0.765849	-0.762439	-1.37124	0	A0A494C1L5;P50851;E9PEM5;H0YAC6;A0A494C0R9	A0A494C1L5;P50851;E9PEM5;H0YAC6;A0A494C0R9	Lipopolysaccharide-responsive and beige-like anchor protein	LRBA
26.7357	27.516	25.226	26.8301	26.4759	24.5284			0.217088	1	0.547772	0.557976	0	Q9Y5Q9;A0A494C1S7;H7C0C0	Q9Y5Q9;A0A494C1S7;H7C0C0	General transcription factor 3C polypeptide 3	GTF3C3
27.5486	28.0603	26.0165	26.9617	27.0007	27.7897			0.0209919	1	-0.0422293	-0.0629666	0	Q6ZRV2;A0A494C1T9;J3KPS2	Q6ZRV2;A0A494C1T9;J3KPS2	Protein FAM83H	FAM83H
26.7629	27.1843	25.8383	27.2814	26.53	26.844			0.253961	1	-0.289919	-0.639585	0	A0A494C1V1;Q6ZNJ1;H0Y764;H7C3Y7;H7C408	A0A494C1V1;Q6ZNJ1;H0Y764	Neurobeachin-like protein 2	NBEAL2
27.8669	28.0698	27.7843	28.1867	28.3281	28.2865			1.72068	0.128427	-0.360112	-3.8048	0	A0A499FI31;Q15020;H0YHU8;A0A494C0L2;F8W667;F8VVK9;F8VZM2	A0A499FI31;Q15020	Squamous cell carcinoma antigen recognized by T-cells 3	SART3
26.2102	26.0395	25.9943	26.2049	26.5706	26.1846			0.777036	0.496979	-0.238711	-1.68589	0	A0A7I2YQL3;A0A7P0SXD0;A0A499FIZ0;Q9H7D7;A0A7I2YQQ9;H0Y9R3;C9JCS7	A0A7I2YQL3;A0A7P0SXD0;A0A499FIZ0;Q9H7D7;A0A7I2YQQ9;H0Y9R3	WD repeat-containing protein 26	WDR26
26.417	27.3179	25.6739	26.7589	26.3346	26.9214			0.14851	1	-0.202009	-0.398851	0	U3KPX3;A0A590UJ43;P48729;D6REM4;A0A5F9W493;E7ETM0;H0Y9X2;U3KQK7;Q8N752;A0A590UK94;A0A590UJQ7;E5RG27;U3KQ83;D6RGE5	U3KPX3;A0A590UJ43;P48729;D6REM4;A0A5F9W493;E7ETM0;H0Y9X2;U3KQK7	Casein kinase I isoform alpha	CSNK1A1
28.2551	28.8438	25.0679	28.4478	27.8903	27.4486			0.16875	1	-0.539935	-0.446969	0	A0A590UJG2;H3BPE1;H3BQK9;A0A7P0MQR8;Q9UPN3;H0Y390;A0A804HL78;E9PNZ4;A0A5F9ZGX0;E9PLY5;A0A669KBB0;E9PLY0;A0A669KB06;H0Y314;E9PS75	A0A590UJG2;H3BPE1;H3BQK9;A0A7P0MQR8;Q9UPN3;H0Y390	Microtubule-actin cross-linking factor 1, isoforms 1/2/3/5	MACF1
29.4882	29.8775	29.1569	29.5391	30.1039	29.7725			0.4892	0.960195	-0.297626	-1.12324	0	A0A590UJK4;A0A590UK01;A0A590UJP7;A0A590UK80;Q13247	A0A590UJK4;A0A590UK01;A0A590UJP7;A0A590UK80;Q13247	Serine/arginine-rich splicing factor 6	SRSF6
27.5552	27.4888	26.5681	27.9632	28.2089	27.8635			1.13509	0.25297	-0.807813	-2.41362	0	A0A5F9UK94;Q01433;H0Y360;H0YF16;A0A804CCZ3;A0A7P0Z4H6;A0A590UJX5;A0A590UK85;A0A804H2H4;A0A7P0TB79;E9PJF6;E9PIJ1;A0A7P0T999	A0A5F9UK94;Q01433;H0Y360;H0YF16;A0A804CCZ3;A0A7P0Z4H6;A0A590UJX5;A0A590UK85;A0A804H2H4	AMP deaminase 2	AMPD2
29.1061	28.9542	28.4341	29.017	29.1901	29.6339			0.752284	0.519172	-0.448886	-1.63737	0	A0A5F9UP49;Q9BRK5;A0A5F9UJX7;G3V1E2;H0Y3T6	A0A5F9UP49;Q9BRK5;A0A5F9UJX7;G3V1E2	45 kDa calcium-binding protein	SDF4
25.9087	27.1381	25.4893	26.7891	26.6652	26.1273			0.259504	1	-0.34851	-0.651656	0	A0A5F9YFS9;C9JBL1;Q9Y6A9	A0A5F9YFS9;C9JBL1;Q9Y6A9	Signal peptidase complex subunit 1	SPCS1
26.7094	26.3631	25.2492	26.5591	27.1313	26.6414			0.635519	0.740072	-0.670023	-1.40959	0	A0A5F9ZH82;E9PHY0;A0A5F9ZHR7;P11117;E9PQY3;A0A5F9ZI20;A0A5F9ZH40;B7Z6U3;B7Z7D2	A0A5F9ZH82;E9PHY0;A0A5F9ZHR7;P11117;E9PQY3;A0A5F9ZI20;A0A5F9ZH40;B7Z6U3;B7Z7D2	Lysosomal acid phosphatase	ACP2
33.3091	33.5086	32.8206	33.8518	33.6711	33.6162			1.08684	0.279095	-0.5003	-2.31173	0	A0A5F9ZHM4;P07195;A0A3B3IS95;A8MW50;C9J7H8;F5H793	A0A5F9ZHM4;P07195;A0A3B3IS95;A8MW50;C9J7H8	L-lactate dehydrogenase B chain;L-lactate dehydrogenase	LDHB
25.8587	26.037	25.3806	27.0088	26.5518	26.3091			1.41871	0.149536	-0.864489	-3.04721	0	A0A5F9ZHN7;Q9NTJ5;E9PGZ4;F8WDN7;C9JV50;F8WCQ2;C9J3E3	A0A5F9ZHN7;Q9NTJ5;E9PGZ4	Phosphatidylinositide phosphatase SAC1	SACM1L
29.4158	28.9325	28.9289	29.674	29.8624	29.6681			1.67952	0.135366	-0.642455	-3.69558	0	P51648;A0A5F9ZHN9;A0A5F9ZGX4;A0A5F9ZHI5;J3QRD1;A0A5F9ZI12;A0A5K1VW72;I3L1M4;A0A5F9ZHZ9;J3QS00;A0A5F9ZHP6;J3QKK9;I3L2W1;J3KTG1;A0A0D9SGC3;J3KTD9;I3L0X1;K7EN73	P51648;A0A5F9ZHN9;A0A5F9ZGX4;A0A5F9ZHI5;J3QRD1;A0A5F9ZI12;A0A5K1VW72;I3L1M4	Fatty aldehyde dehydrogenase	ALDH3A2
25.8205	26.2346	25.5335	26.8113	26.9144	27.0856			2.09862	0.0555556	-1.07423	-4.91314	0	V9GYM8;A0A5F9ZI21;Q92974;V9GYF5;V9GYG5;V9GZ14;V9GYF0;Q5VY93	V9GYM8;A0A5F9ZI21;Q92974	Rho guanine nucleotide exchange factor 2	ARHGEF2
26.982	27.3704	26.077	26.7546	26.6502	27.2438			0.0596223	1	-0.0730693	-0.172092	0	A0A5H1ZRP4;Q8WX92	A0A5H1ZRP4;Q8WX92	Negative elongation factor B	NELFB
27.0285	27.2405	27.0794	26.9162	26.7171	26.4998			1.38812	0.157306	0.405093	2.97564	0	Q13620;A0A7P0T954;K4DI93;A0A669KAX4;A0A7P0TAQ3;A0A7P0T9L3;A0A7P0T8P8;A0A7P0T9C8;A0A804CL36;A0A7P0T9D0;A0A669KBG9;A0A7P0T9P5;A0A7P0TAF9;A0A7P0Z4G9;A0A7P0T9R8;A0A7P0T8W4;A0A7P0Z439;A0A7P0Z4E4	Q13620;A0A7P0T954;K4DI93;A0A669KAX4;A0A7P0TAQ3;A0A7P0T9L3;A0A7P0T8P8;A0A7P0T9C8;A0A804CL36;A0A7P0T9D0;A0A669KBG9;A0A7P0T9P5;A0A7P0TAF9	Cullin-4B	CUL4B
27.7501	28.3	26.646	27.6334	27.5735	27.838			0.0834988	1	-0.116278	-0.23591	0	Q92538;A0A7I2V452;A0A7I2V2L5;A0A7I2YQM2;A0A7I2YQ65;A0A7P0RGV0;A0A669KB10;A0A669KBG8;A0A7I2V514;A0A7I2V529;A0A7I2V4K2;A0A7I2V3Y5;A0A7I2V2L4;A0A7I2V329;A0A7I2V3Q4;A0A7I2V342;A0A7I2V4M6;A0A7I2V3E5;A0A7I2V4F9;A0A7I2YQN3;A0A7I2YQA6;A0A7I2V4H1;A0A7I2V4L8;A0A7I2V3Y7;A0A7I2V5T8;A0A7I2YQ62;A0A7I2V3H2;A0A7I2V5V9;A0A7I2V3S0;A0A7I2V4X4;A0A7I2V2Y7;A0A7I2V338;A0A7I2V2I0;A0A7I2V4W6;A0A7I2V622;A0A7I2YQN6;A0A7I2V…	Q92538;A0A7I2V452;A0A7I2V2L5;A0A7I2YQM2;A0A7I2YQ65;A0A7P0RGV0;A0A669KB10;A0A669KBG8;A0A7I2V514;A0A7I2V529;A0A7I2V4K2;A0A7I2V3Y5;A0A7I2V2L4	Golgi-specific brefeldin A-resistance guanine nucleotide exchange factor 1	GBF1
28.9976	29.6	27.5928	29.1053	29.1319	28.9638			0.219929	1	-0.336876	-0.564351	0	A0A669KB68;A0A669KB56;A0A669KBA4;A0A669KB53;P42224;A0A669KBI6;J3KPM9;A0A669KB52;A0A669KB75;E7EPD2;D2KFR9;A0A669KB17;E7ENM1;E9PH66;Q67C41	A0A669KB68;A0A669KB56;A0A669KBA4;A0A669KB53;P42224;A0A669KBI6;J3KPM9;A0A669KB52;A0A669KB75	Signal transducer and activator of transcription 1-alpha/beta;Signal transducer and activator of transcription	STAT1
28.033	28.5325	27.5038	27.8989	28.3669	28.3908			0.226997	1	-0.195758	-0.580143	0	A0A669KBJ7;Q9H2P0;A0A2R8Y6X0;A0A2R8YCL6	A0A669KBJ7;Q9H2P0;A0A2R8Y6X0	Activity-dependent neuroprotector homeobox protein	ADNP
28.2438	29.0917	27.3279	28.2701	28.4917	28.3901			0.115244	1	-0.162838	-0.317241	0	A0A669KBL1;Q93009;H3BND8;F5H2X1;H3BQD1;I3L2D8;H3BMF6;H3BUV0;H3BTM1;H3BRA2	A0A669KBL1;Q93009;H3BND8	Ubiquitin carboxyl-terminal hydrolase 7;Ubiquitin carboxyl-terminal hydrolase	USP7
28.3579	28.8117	26.5136	28.3029	28.4667	28.3135			0.264353	1	-0.466649	-0.662179	0	Q99615;A0A6I8PU73;A0A6I8PIK4;A0A6I8PUD4;A0A6I8PS32;A0A6I8PRZ0;K7ER44;A0A6I8PLE7;A0A6I8PU89;A0A6I8PUC2;K7EPP7;K7EIH8;K7EK03;K7ESP1;K7ELJ8;K7EJE9;K7EJV7;K7EN19;K7EJL5;A0A6I8PR93	Q99615;A0A6I8PU73;A0A6I8PIK4;A0A6I8PUD4;A0A6I8PS32;A0A6I8PRZ0;K7ER44;A0A6I8PLE7;A0A6I8PU89;A0A6I8PUC2;K7EPP7	DnaJ homolog subfamily C member 7	DNAJC7
28.6648	29.4162	28.2343	28.5572	28.4718	28.6376			0.245028	1	0.216189	0.620026	0	A0A6I8PIV1;Q9P2J5;A0A6I8PL42;B4DER1;A0A6I8PIT3;A0A6I8PRS0;A0A6I8PLB8;A0A6I8PLB3;A0A6I8PS05;A0A6I8PIP7;A0A6I8PTV8;A0A6I8PRU9;A0A6I8PRP1	A0A6I8PIV1;Q9P2J5;A0A6I8PL42;B4DER1;A0A6I8PIT3;A0A6I8PRS0;A0A6I8PLB8;A0A6I8PLB3;A0A6I8PS05;A0A6I8PIP7;A0A6I8PTV8	Leucine--tRNA ligase, cytoplasmic	LARS
26.6503	26.6894	24.6097	26.3183	26.2919	26.519			0.222241	1	-0.393294	-0.569526	0	A0A6Q8KRG2;Q08379;A0A087WYC0;A0A1W2PQY5;B7ZC06	A0A6Q8KRG2;Q08379	Golgin subfamily A member 2	GOLGA2
27.3421	27.1243	26.4491	27.7374	27.5551	27.5603			1.10247	0.26787	-0.645779	-2.34458	0	B4DHE8;A0A6Q8PF05;Q96DH6;J3KTC1;B4DM51;A0A6Q8PHT3;J3QKT5;A0A6Q8PFU8;A0A6Q8PGD8;A0A6Q8PHP1;H0YHB7;O43347	B4DHE8;A0A6Q8PF05;Q96DH6;J3KTC1;B4DM51	RNA-binding protein Musashi homolog 2	MSI2
29.012	29.5972	27.5672	29.627	29.2026	29.4135			0.48713	0.959349	-0.688924	-1.11915	0	A0A7I2PK44;A0A6Q8PG15;A0A6Q8PFE1;O95831;A0A6Q8PFM5;A0A6Q8PHC0;A0A6Q8PHJ9;A0A6Q8PFQ8;A0A6Q8PFS4;A0A6Q8PFA7;A0A7I2RLJ8;E9PMA0;A0A6Q8PFW2;A0A6Q8PHJ4;A0A6Q8PF87;A0A6Q8PFN1	A0A7I2PK44;A0A6Q8PG15;A0A6Q8PFE1;O95831;A0A6Q8PFM5;A0A6Q8PHC0;A0A6Q8PHJ9;A0A6Q8PFQ8;A0A6Q8PFS4;A0A6Q8PFA7;A0A7I2RLJ8;E9PMA0;A0A6Q8PFW2	Apoptosis-inducing factor 1, mitochondrial	AIFM1
31.3632	30.9623	30.8093	31.5741	31.4746	31.4585			1.26962	0.205387	-0.457464	-2.70617	0	A0A6Q8PFJ0;P02545;A0A804HL68;A0A6Q8PHQ9;A0A6Q8PF80;A0A6Q8PGH0;A0A6Q8PFM1;A0A6Q8PF59;A0A6Q8PFF5	A0A6Q8PFJ0;P02545;A0A804HL68;A0A6Q8PHQ9;A0A6Q8PF80	Prelamin-A/C;Lamin-A/C	LMNA
27.0639	27.6396	25.7787	27.2028	26.918	27.3914			0.238429	1	-0.343321	-0.605494	0	Q6UWE0;A0A6Q8PGT8;A0A6Q8PGB2;A0A6Q8PGF7;A0A6Q8PG02;A0A6Q8PGW1;A0A6Q8PFL5;A0A6Q8PFT9;A0A6Q8PFW1;A0A6Q8PH70;A0A6Q8PFI6;A0A6Q8PHH6;A0A6Q8PFL1;A0A6Q8PGZ2;A0A6Q8PF55;A0A6Q8PG90;A0A6Q8PGH9	Q6UWE0;A0A6Q8PGT8;A0A6Q8PGB2;A0A6Q8PGF7;A0A6Q8PG02;A0A6Q8PGW1;A0A6Q8PFL5;A0A6Q8PFT9;A0A6Q8PFW1;A0A6Q8PH70;A0A6Q8PFI6;A0A6Q8PHH6	E3 ubiquitin-protein ligase LRSAM1	LRSAM1
28.9434	28.7788	29.1362	29.2999	29.235	29.2328			1.34228	0.175817	-0.303062	-2.86999	0	A0A6Q8PFU3;P43034;A0A6Q8PFT2;A0A6Q8PG63;A0A6Q8PH33;I3L495	A0A6Q8PFU3;P43034;A0A6Q8PFT2;A0A6Q8PG63	Platelet-activating factor acetylhydrolase IB subunit alpha	PAFAH1B1
28.5585	29.0561	27.6965	29.0451	29.2354	28.8442			0.663559	0.688707	-0.604553	-1.4642	0	A0A6Q8PFY7;Q92734;A0A6Q8PFC4;A0A6Q8PH89;A0A6Q8PH27;A0A6Q8PG00;A0A6Q8PG04;A0A6Q8PGS4;A0A6Q8PF40;C9JJP5;C9JUE0;C9JTY3;A0A6Q8PF51	A0A6Q8PFY7;Q92734;A0A6Q8PFC4;A0A6Q8PH89;A0A6Q8PH27;A0A6Q8PG00;A0A6Q8PG04;A0A6Q8PGS4;A0A6Q8PF40;C9JJP5;C9JUE0	Protein TFG	TFG
27.2994	28.0264	26.5529	27.5125	27.4074	27.5379			0.170836	1	-0.193052	-0.451867	0	A0A6Q8PGB0;P24928	A0A6Q8PGB0;P24928	DNA-directed RNA polymerase II subunit RPB1	POLR2A
29.0152	29.0425	28.2655	29.0399	29.2295	29.4371			0.759491	0.510506	-0.461101	-1.65149	0	P49588;H3BPK7;A0A6Q8PGN5;A0A6Q8PFY2;A0A6Q8PF33;A0A6Q8PGE8;A0A6Q8PGR9;A0A6Q8PFK3;A0A6Q8PHJ2;A0A6Q8PGB5;A0A6Q8PH44;A0A6Q8PHP7;A0A6Q8PHP3;A0A6Q8PF77;A0A6Q8PG28;A0A6Q8PG62;A0A6Q8PGI8;A0A6Q8PHN5	P49588;H3BPK7;A0A6Q8PGN5;A0A6Q8PFY2;A0A6Q8PF33;A0A6Q8PGE8;A0A6Q8PGR9;A0A6Q8PFK3;A0A6Q8PHJ2;A0A6Q8PGB5;A0A6Q8PH44;A0A6Q8PHP7;A0A6Q8PHP3;A0A6Q8PF77	Alanine--tRNA ligase, cytoplasmic	AARS
25.459	25.6768	25.3829	24.8357	25.384	25.5739			0.434667	1	0.241727	1.01487	0	A0A6Q8PGU6;Q8NB90	A0A6Q8PGU6;Q8NB90	Spermatogenesis-associated protein 5	SPATA5
29.1859	30.0272	27.3294	29.4653	29.6826	29.7333			0.413802	1	-0.779563	-0.97299	0	A0A6Q8PH20;P20810;B7Z574;A0A6Q8PFE5;E7ES10;A0A0C4DGB5;E9PDE4;A0A6Q8PGG5;E9PCH5;A0A6Q8PG72;H0Y7F0;E7EQ12;E7EQA0;A0A6Q8PFL0;A0A0C4DGD1;E7EN75;D6RGF7;D6RBR1;A0A6Q8PG40	A0A6Q8PH20;P20810;B7Z574;A0A6Q8PFE5;E7ES10;A0A0C4DGB5;E9PDE4;A0A6Q8PGG5;E9PCH5;A0A6Q8PG72;H0Y7F0;E7EQ12;E7EQA0	Calpastatin	CAST
29.5833	29.7216	29.4035	29.8361	29.9404	29.9841			1.5792	0.131255	-0.350745	-3.43763	0	Q27J81;A0A6Q8PHA2;A0A6Q8PH71;A0A6Q8PHG2;A0A6Q8PGN3;A0A6Q8PF44;A0A6Q8PH25;A0A6Q8PF29;A0A6Q8PFW4;A0A087X118;A0A6Q8PGC7;A0A6Q8PH63;A0A0A0MQU1;A0A6Q8PFN5;A0A6Q8PGU8;A0A6Q8PHS8;A0A6Q8PH59;A0A6Q8PFB9;A0A6Q8PGY8;A0A6Q8PH52;A0A6Q8PFY4;A0A6Q8PG64;A0A6Q8PFJ1;A0A6Q8PGX4;A0A6Q8PF91;A0A6Q8PEY5;A0A6Q8PGK9;A0A6Q8PEY8	Q27J81;A0A6Q8PHA2;A0A6Q8PH71;A0A6Q8PHG2;A0A6Q8PGN3;A0A6Q8PF44;A0A6Q8PH25;A0A6Q8PF29;A0A6Q8PFW4;A0A087X118;A0A6Q8PGC7;A0A6Q8PH63;A0A0A0MQU1;A0A6Q8PFN5;A0A6Q8PGU8;A0A6Q8PHS8;A0A6Q8PH59;A0A6Q8PFB9;A0A6Q8PGY8	Inverted formin-2	INF2
27.1077	27.7365	24.2088	27.4657	27.8952	27.2125			0.458507	0.996955	-1.17344	-1.06242	0	A0A6Q8PH91;Q9BQ69	A0A6Q8PH91;Q9BQ69	O-acetyl-ADP-ribose deacetylase MACROD1	MACROD1
27.3807	28.5616	27.2616	27.874	27.7716	27.9905			0.125688	1	-0.144056	-0.343229	0	A0A6Q8PHP0;P49902;A0A6Q8PHB5;Q5JUV4;Q5JUV6;H0YHR8;A0A6Q8PFH2;A0A6Q8PG36	A0A6Q8PHP0;P49902;A0A6Q8PHB5	Cytosolic purine 5-nucleotidase	NT5C2
27.8442	27.6021	27.6531	28.6925	28.5193	28.9049	+	3ha_huvec	2.77757	0.00953846	-1.0058	-7.526	0	O14964;A0A7I2V5A2;A0A7I2V5A3;A0A7I2V3J3;A0A7I2V2R9;A0A7I2V2W5;A0A7I2V2D8;A0A7I2YQD1;I3L1P5;A0A7I2V3F9;A0A7I2V3I8;A0A7I2V2K2;A0A7I2V637;A0A7I2V307;A0A7I2V6E0;A0A7I2V3Z1;A0A7I2V4X6;A0A7I2V5W6;A0A7I2V5D6;A0A7I2V5N3;A0A7I2V331;A0A7I2V5X2;I3L165;A0A7I2V628	O14964;A0A7I2V5A2;A0A7I2V5A3;A0A7I2V3J3;A0A7I2V2R9;A0A7I2V2W5;A0A7I2V2D8;A0A7I2YQD1;I3L1P5;A0A7I2V3F9;A0A7I2V3I8;A0A7I2V2K2;A0A7I2V637;A0A7I2V307;A0A7I2V6E0;A0A7I2V3Z1	Hepatocyte growth factor-regulated tyrosine kinase substrate	HGS
29.818	30.5584	28.8475	29.9097	30.0799	30.3503			0.294579	1	-0.372019	-0.727015	0	H7C4K3;A0A7I2V2F9;E7EUI6;P05556;A0A7I2V348;C9JPK5;A0A7I2V5Z8;A0A7I2V5T3;Q5T3E6;E9PLR6;E7EQW5;Q5T3E5;E9PQJ2;H7C4N8	H7C4K3;A0A7I2V2F9;E7EUI6;P05556;A0A7I2V348;C9JPK5;A0A7I2V5Z8;A0A7I2V5T3	Integrin beta;Integrin beta-1	ITGB1
28.8114	28.5847	27.7982	29.2369	29.1274	29.3856			1.26501	0.204731	-0.851871	-2.69592	0	P60228;A0A7I2V3S3;A0A7I2V3I0;A0A7I2V2H9;A0A7I2V2W0;A0A7I2V5Z6;A0A7I2V4B4;A0A7I2V3I2;B3KW56;H0YBP5;A0A7I2V4G3;E5RGA2;A0A7I2V5P9;E5RHS5;A0A161SXE1;A0A7I2V570;A0A7I2V429;H0YBR5;A0A7I2V3W9;A0A7I2V2Q9;A0A7I2V5K7;H0YAW4;E5RJ25;A0A7I2V2S9;E5RII3;E5RIP5	P60228;A0A7I2V3S3;A0A7I2V3I0;A0A7I2V2H9;A0A7I2V2W0;A0A7I2V5Z6;A0A7I2V4B4;A0A7I2V3I2;B3KW56;H0YBP5;A0A7I2V4G3;E5RGA2;A0A7I2V5P9;E5RHS5	Eukaryotic translation initiation factor 3 subunit E	EIF3E
30.4958	31.7059	30.9654	31.1524	31.2693	30.7409			0.00126213	1	0.00149727	0.00386928	0	F8VZJ2;F8W0W4;A0A7I2V2K5;H0YHX9;A0A7I2V473;Q13765;E9PAV3;F8VNW4;F8VZ58	F8VZJ2;F8W0W4;A0A7I2V2K5;H0YHX9;A0A7I2V473;Q13765;E9PAV3;F8VNW4	Nascent polypeptide-associated complex subunit alpha;Nascent polypeptide-associated complex subunit alpha, muscle-specific form	NACA
27.3021	26.2196	24.774	27.451	27.3217	26.8899			0.678395	0.659	-1.12236	-1.4931	0	A0A7I2YQT5;A0A7I2V6E3;A0A7I2V466;A0A7I2V2Q8;P53634;A0A7I2V5C5;H0YCY8;A0A7I2V2V5	A0A7I2YQT5;A0A7I2V6E3;A0A7I2V466;A0A7I2V2Q8;P53634	Dipeptidyl peptidase 1;Dipeptidyl peptidase 1 exclusion domain chain;Dipeptidyl peptidase 1 heavy chain;Dipeptidyl peptidase 1 light chain	CTSC
30.8087	30.6987	29.5188	31.421	30.9484	30.6793			0.65409	0.708838	-0.674177	-1.44575	0	A0A7I2V2R3;A0A7I2V5D8;P51991;A0A7I2V4J6;A0A7I2V402;A0A7I2V4G0;H7C1J8	A0A7I2V2R3;A0A7I2V5D8;P51991;A0A7I2V4J6;A0A7I2V402;A0A7I2V4G0	Heterogeneous nuclear ribonucleoprotein A3	HNRNPA3
31.2188	31.7513	29.5994	31.0318	31.1971	31.1213			0.149398	1	-0.260178	-0.400985	0	A0A7I2V2T3;P12268;E7ETK5;H0Y4R1;A0A7I2YQK5;A0A7I2V5N6	A0A7I2V2T3;P12268;E7ETK5;H0Y4R1;A0A7I2YQK5	Inosine-5-monophosphate dehydrogenase 2	IMPDH2
28.9363	28.1439	28.8274	28.9719	29.3389	29.3755			0.994991	0.322957	-0.592869	-2.1216	0	A0A7I2V4T9;A0A7I2V2U2;A0A7I2V5Z3;A0A7I2V588;O43765;A0A7I2V697;K7EMD6;A0A7I2YQY5;K7ERW5	A0A7I2V4T9;A0A7I2V2U2;A0A7I2V5Z3;A0A7I2V588;O43765;A0A7I2V697;K7EMD6	Small glutamine-rich tetratricopeptide repeat-containing protein alpha	SGTA
28.4446	27.8538	24.9368	28.0223	28.5319	28.3696			0.489175	0.959109	-1.22953	-1.12319	0	A0A7I2V2U6;P13995;B9A062;B8ZZU9;A0A7I2YQD4;A0A7I2V482	A0A7I2V2U6;P13995;B9A062;B8ZZU9;A0A7I2YQD4;A0A7I2V482	Bifunctional methylenetetrahydrofolate dehydrogenase/cyclohydrolase, mitochondrial;NAD-dependent methylenetetrahydrofolate dehydrogenase;Methenyltetrahydrofolate cyclohydrolase	MTHFD2
27.1405	27.7653	26.1422	26.923	26.7157	26.9714			0.110267	1	0.146002	0.304729	0	B7Z2R7;A0A7I2YQE9;A0A7I2YQD7;A0A7I2V5E1;A0A7I2V2Y9;Q5T8D3;A0A7I2V420;A0A7I2V560;A0A7I2YQJ9;A0A7I2V347;A0A7I2V2M2;A0A7I2V5U2;A0A7I2V690;A0A7I2V5L4;A0A7I2V556;X6RDD7;A0A7I2YQS1;A0A7I2V462;Q5T8E0;A0A7I2V2R8;K7EM05;Q8NC06	B7Z2R7;A0A7I2YQE9;A0A7I2YQD7;A0A7I2V5E1;A0A7I2V2Y9;Q5T8D3;A0A7I2V420;A0A7I2V560;A0A7I2YQJ9;A0A7I2V347;A0A7I2V2M2;A0A7I2V5U2;A0A7I2V690;A0A7I2V5L4;A0A7I2V556;X6RDD7;A0A7I2YQS1;A0A7I2V462;Q5T8E0	Acyl-CoA-binding domain-containing protein 5	ACBD5
28.4919	28.258	27.8898	27.9348	27.4546	27.3795			1.18725	0.245822	0.62361	2.5255	0	A0A7I2V351;A0A7I2V487;A0A7I2YQE1;P52292;A0A7I2V3Z3;J3QLL0;J3KS65;J3QL07	A0A7I2V351;A0A7I2V487;A0A7I2YQE1;P52292;A0A7I2V3Z3	Importin subunit alpha-1	KPNA2
28.4394	29.0715	26.8727	28.4979	28.4929	28.8014			0.2865	1	-0.469528	-0.709807	0	Q8WVM8;A0A7I2V3B4;A0A7I2V5I2;A0A7I2V4B8;A0A7I2V5Z4;A0A7I2V4U2;A0A7I2V4R0;A0A7I2V3G4;A0A7I2V320;A0A7I2V590;A0A7I2V448;A0A7I2V362;A0A7I2V2U5;B7Z5N7;A0A7I2V3C9;A0A7I2YQR2;H0YIZ7;G3V2M8;G3V5E2;A0A7I2V5H5;A0A7I2V534;H0YJY1;A0A7I2V321;A0A7I2V5R9;A0A7I2YQQ1;J3KNG4;G3V4I1;G3V5F3;A0A7I2V3Y3;A0A7I2V414;A0A7I2V4B9;G3V363;A0A7I2V5L2;H0YJS6;G3V3K9	Q8WVM8;A0A7I2V3B4;A0A7I2V5I2;A0A7I2V4B8;A0A7I2V5Z4;A0A7I2V4U2;A0A7I2V4R0;A0A7I2V3G4;A0A7I2V320;A0A7I2V590;A0A7I2V448;A0A7I2V362;A0A7I2V2U5;B7Z5N7;A0A7I2V3C9;A0A7I2YQR2;H0YIZ7;G3V2M8;G3V5E2;A0A7I2V5H5;A0A7I2V534	Sec1 family domain-containing protein 1	SCFD1
31.6586	31.4144	30.1962	31.5981	31.5335	31.7159			0.505371	0.952388	-0.526077	-1.15514	0	A0A7I2V428;C9JLB1;A0A7I2V3F3;H7BY16;P19338;A0A7I2V5M5;A0A7I2V2U7;A0A7I2V349;A0A7I2V506;A0A7I2V699;A0A7I2V2S8	A0A7I2V428;C9JLB1;A0A7I2V3F3;H7BY16;P19338;A0A7I2V5M5;A0A7I2V2U7;A0A7I2V349;A0A7I2V506;A0A7I2V699	Nucleolin	NCL
27.9722	28.3049	27.5293	27.881	27.8536	27.9318			0.072472	1	0.0466849	0.206744	0	A0A7I2V4C8;A0A7I2YQR5;A0A7I2V444;A0A7I2V5N9;A0A7I2V3V0;P40763;A0A7I2V4R2;A0A7I2YQI1;A0A7I2V395;A0A7I2YQD2;A0A7I2V552;A0A7I2V4R3;A0A7I2V2G1;A0A7I2V2T1;G8JLH9;A0A7I2V4F6	A0A7I2V4C8;A0A7I2YQR5;A0A7I2V444;A0A7I2V5N9;A0A7I2V3V0;P40763;A0A7I2V4R2;A0A7I2YQI1;A0A7I2V395;A0A7I2YQD2;A0A7I2V552;A0A7I2V4R3;A0A7I2V2G1;A0A7I2V2T1;G8JLH9;A0A7I2V4F6	Signal transducer and activator of transcription 3;Signal transducer and activator of transcription	STAT3
30.0683	30.4305	29.3232	30.0101	29.9475	30.0827			0.0781105	1	-0.0727914	-0.221721	0	A0A7I2V430;A0A7I2V4F0;Q92499;A0A7I2V2M5;A0A087WZ71;A0A7I2YQ77;A0A087X2G1;A0A7I2V4J3;A0A7I2V421;A0A7I2V5X8	A0A7I2V430;A0A7I2V4F0;Q92499;A0A7I2V2M5;A0A087WZ71;A0A7I2YQ77;A0A087X2G1;A0A7I2V4J3	ATP-dependent RNA helicase DDX1	DDX1
27.5074	27.8731	24.838	27.6782	27.7689	27.5617			0.412511	1	-0.930103	-0.97039	0	A0A7I2YQA8;A0A7I2V5F1;A0A7I2YQQ0;A0A7I2V5D0;A0A7I2V490;P26358;A0A7I2V5F6;A0A7I2V311;K7EMU8;A0A7I2V3F8;K7EJL0;A0A7I2V2G5;K7EIZ6;K7ENW7	A0A7I2YQA8;A0A7I2V5F1;A0A7I2YQQ0;A0A7I2V5D0;A0A7I2V490;P26358;A0A7I2V5F6;A0A7I2V311	DNA (cytosine-5)-methyltransferase 1	DNMT1
30.4813	30.8778	29.5137	30.7481	30.7668	30.7763			0.511268	0.943564	-0.472777	-1.16674	0	A0A7I2V4J2;A0A7I2V5Y7;A0A7I2V535;Q15233;A0A7P0MRW0;A0A7I2V4N2;A0A7I2V464;A0A7I2V4K9;H7C367;C9JYS8;C9IZL7;C9J4X2;A0A7I2YQK8	A0A7I2V4J2;A0A7I2V5Y7;A0A7I2V535;Q15233;A0A7P0MRW0;A0A7I2V4N2;A0A7I2V464;A0A7I2V4K9;H7C367	Non-POU domain-containing octamer-binding protein	NONO
28.2601	27.5123	27.0292	27.601	27.6116	26.7807			0.234388	1	0.269411	0.596559	0	A0A7I2V4K5;X6R5C5;X6R8A1;P10619;A0A7I2V4D1;A0A7I2YQT8;A0A7I2V3B2;Q5JZH0;A0A7I2V4R8	A0A7I2V4K5;X6R5C5;X6R8A1;P10619;A0A7I2V4D1;A0A7I2YQT8;A0A7I2V3B2;Q5JZH0	Carboxypeptidase;Lysosomal protective protein;Lysosomal protective protein 32 kDa chain;Lysosomal protective protein 20 kDa chain	CTSA
27.1186	27.5251	26.2492	27.6141	27.5886	26.7786			0.319228	1	-0.362804	-0.779022	0	A0A7I2V4L6;O15498;A0A7I2V3A1;A0A7I2V3V7;A0A7I2V3S2;A0A7I2V530	A0A7I2V4L6;O15498;A0A7I2V3A1;A0A7I2V3V7	Synaptobrevin homolog YKT6	YKT6
28.6156	28.6453	28.2094	28.4895	28.5339	28.5512			0.0870042	1	-0.034757	-0.245077	0	A0A7I2V4L7;B1ANR0;Q13310;A0A7I2V5W9;A0A7I2V598;H0Y5F5;H0YEU6;A0A7I2V4V6;H0YCC8;H0YEQ8;B1ANR1;H0Y6X6;H0YER0;P0CB38	A0A7I2V4L7;B1ANR0;Q13310;A0A7I2V5W9;A0A7I2V598;H0Y5F5;H0YEU6	Polyadenylate-binding protein;Polyadenylate-binding protein 4	PABPC4
28.4268	28.9393	28.33	28.3809	28.4772	28.5459			0.191261	1	0.097367	0.499299	0	A0A7I2V539;P30419;A0A7I2V3X4;A0A7I2V3U5;A0A7I2V4Y5;K7EN82;B7Z8J4;K7EN42;A0A7I2V3M5	A0A7I2V539;P30419;A0A7I2V3X4;A0A7I2V3U5	Glycylpeptide N-tetradecanoyltransferase 1	NMT1
26.7579	27.3366	24.9915	27.3277	27.0885	27.0543			0.486872	0.960018	-0.794827	-1.11864	0	A0A7I2YQ87;A0A7I2V5H3;O75569;A0A7I2V2P4;F8WEG8;G5E9Q4;A0A7I2V5C2;A0A7I2V3L6;C9JMM3;A0A7I2V315;A0A7I2V593;B4DJC7;A0A7I2V2I8;A0A7I2V3J2	A0A7I2YQ87;A0A7I2V5H3;O75569;A0A7I2V2P4;F8WEG8;G5E9Q4;A0A7I2V5C2;A0A7I2V3L6;C9JMM3	Interferon-inducible double-stranded RNA-dependent protein kinase activator A	PRKRA
27.1051	27.2303	25.1158	27.0238	27.4028	26.6999			0.320478	1	-0.558406	-0.781641	0	C9JN15;A0A7I2V629;A0A7I2V5Q5;Q13427;C9JM79;E9PG73;A0A7I2V4F2;A0A7I2V4W3;C9J679	C9JN15;A0A7I2V629;A0A7I2V5Q5;Q13427;C9JM79;E9PG73;A0A7I2V4F2;A0A7I2V4W3	Peptidyl-prolyl cis-trans isomerase;Peptidyl-prolyl cis-trans isomerase G	PPIG
28.7264	28.7889	26.4598	29.0305	29.0427	28.8446			0.566928	0.858541	-0.980902	-1.27584	0	A0A7I2V5R1;Q8TD19;A0A7I2V454;G3V5V0;G3V459;G3V2Z5;A0A7I2V4E9	A0A7I2V5R1;Q8TD19;A0A7I2V454;G3V5V0	Serine/threonine-protein kinase Nek9	NEK9
26.6278	26.6534	26.6471	26.847	27.1506	27.5252			1.27033	0.20586	-0.53153	-2.70773	0	Q5JWF2;P63092;A0A7I2V5R6;A0A590UJB7;A0A590UJR6;Q5JWE9;A0A590UJS2;A0A0A0MR13;A0A590UJQ9;A0A590UJ22;S4R3V9;A0A590UJ58;B0AZR9;A0A590UJY8;A0A590UJQ2;A0A590UJI6;A0A590UJA5;A0A590UKB4;A0A590UJF0;A0A590UKA4;A0A590UK28;A0A590UKA1;A0A590UKA9;A0A590UJB0;A0A590UJG5;A0A590UJJ0;A0A804HIH4;A0A590UJY2;S4R3E3;P38405;H0Y7E8;Q5JWD1;K7EQ80;A0A590UJC9;K7EPE2;A0A590UJX3	Q5JWF2;P63092;A0A7I2V5R6;A0A590UJB7;A0A590UJR6;Q5JWE9;A0A590UJS2;A0A0A0MR13;A0A590UJQ9;A0A590UJ22;S4R3V9;A0A590UJ58;B0AZR9;A0A590UJY8;A0A590UJQ2;A0A590UJI6;A0A590UJA5;A0A590UKB4;A0A590UJF0;A0A590UKA4;A0A590UK28;A0A590UKA1;A0A590UKA9;A0A590UJB0;A0A590UJG5;A0A590UJJ0;A0A804HIH4;A0A590UJY2	Guanine nucleotide-binding protein G(s) subunit alpha isoforms XLas;Guanine nucleotide-binding protein G(s) subunit alpha isoforms short	GNAS
32.4303	32.5153	32.7266	32.7794	33.0284	32.9988			1.48443	0.143089	-0.378129	-3.20396	0	A0A7I2V5S2;A0A7I2YQC0;P06748;A0A7I2V433;A0A7I2V2X9;A0A7I2V3U2;A0A7I2V4G8;A0A7I2V5J8;E5RI98;A0A7I2V3G5;A0A7I2V579;E5RGW4	A0A7I2V5S2;A0A7I2YQC0;P06748;A0A7I2V433;A0A7I2V2X9;A0A7I2V3U2;A0A7I2V4G8;A0A7I2V5J8;E5RI98;A0A7I2V3G5;A0A7I2V579	Nucleophosmin	NPM1
29.5766	28.9861	28.6272	29.5889	29.5035	29.9415			0.934442	0.365406	-0.614663	-1.99866	0	P07858;E9PHZ5;A0A7I2V668;A0A7I2V440;A0A7P0NGZ6;A0A7I2YQK9;E9PQM1;E9PR21;A0A7I2V4Z9;E9PSG5;A0A7I2V367;R4GMQ5;E9PLY3;E9PNL5;E9PKQ7;A0A7I2V4S6;E9PCB3;A0A7I2V2J1;A0A7I2V302	P07858;E9PHZ5;A0A7I2V668;A0A7I2V440;A0A7P0NGZ6;A0A7I2YQK9;E9PQM1;E9PR21;A0A7I2V4Z9;E9PSG5	Cathepsin B;Cathepsin B light chain;Cathepsin B heavy chain	CTSB
28.7387	29.1296	24.5744	28.7269	28.8709	29.1733			0.420181	1	-1.44279	-0.985823	0	A0A7I2YQ78;Q5SRQ6;P67870;Q5SRQ3;N0E472;A0A0G2JM12;A0A7I2V500;N0E644;A0A0G2JM58;A0A7I2YQQ2	A0A7I2YQ78;Q5SRQ6;P67870;Q5SRQ3;N0E472;A0A0G2JM12;A0A7I2V500;N0E644;A0A0G2JM58;A0A7I2YQQ2	Casein kinase II subunit beta	CSNK2B;CSNK2B-LY6G5B-1181;CSNK2B-LY6G5B--991;CSNK2B-LY6G5B-562
29.2616	29.9265	27.0993	29.2068	29.5051	29.2719			0.262849	1	-0.565508	-0.65892	0	A0A7I2YQ95;H7C4F6;O00629;A0A7I2V340;A0A7I2V333	A0A7I2YQ95;H7C4F6;O00629;A0A7I2V340;A0A7I2V333	Importin subunit alpha-3	KPNA4
29.8038	30.5222	27.18	29.7098	29.9429	29.7441			0.244522	1	-0.63026	-0.618914	0	Q13347;A0A7I2YQF8;A0A7I2YQI2;A0A7I2V613;A0A7I2V607;A0A7I2V3N2;A0A7I2V2M3;A0A7I2V3U3;A0A7P0MRT9;A0A7I2V640;A0A7I2V685;A0A7I2YQU2;A0A7I2YQC8;A0A7I2YQI6;A0A7I2YQT9;A0A7I2V5V8;Q5TFK1;A0A7I2V4S8;A0A7I2V3K6;A0A7I2V4C2;A0A7I2YQP9;A0A7I2V391;A0A7I2YQN1;A0A7I2YQX4;A0A7I2V5E4;A0A7I2V3T4;A0A7I2V415	Q13347;A0A7I2YQF8;A0A7I2YQI2;A0A7I2V613;A0A7I2V607;A0A7I2V3N2;A0A7I2V2M3;A0A7I2V3U3;A0A7P0MRT9;A0A7I2V640;A0A7I2V685;A0A7I2YQU2;A0A7I2YQC8;A0A7I2YQI6;A0A7I2YQT9;A0A7I2V5V8;Q5TFK1;A0A7I2V4S8;A0A7I2V3K6;A0A7I2V4C2;A0A7I2YQP9	Eukaryotic translation initiation factor 3 subunit I	EIF3I
31.9005	31.2975	30.8996	31.9734	32.3855	31.5319			0.716672	0.578375	-0.597769	-1.56775	0	J3QR09;J3KTE4;A0A7I2YQG2;P84098;A0A7I2V4U6;A0A7I2V2L0;A0A7I2V512;A0A7I2V638	J3QR09;J3KTE4;A0A7I2YQG2;P84098;A0A7I2V4U6;A0A7I2V2L0;A0A7I2V512	Ribosomal protein L19;60S ribosomal protein L19	RPL19
29.2968	29.0199	27.4633	28.7935	28.5776	29.0998			0.144849	1	-0.230269	-0.390029	0	A0A7I2YQQ3;Q92820;A0A7I2V5X9;A0A7I2V5P2;A0A7I2V5M0	A0A7I2YQQ3;Q92820;A0A7I2V5X9;A0A7I2V5P2	Gamma-glutamyl hydrolase	GGH
28.1293	28.8406	27.5046	27.9533	27.7457	27.9231			0.29413	1	0.284128	0.726062	0	G5E9W7;A0A7P0MKV3;P82650;H7C5F2;H7C5H3;H7C5L9;C9J5D8	G5E9W7;A0A7P0MKV3;P82650;H7C5F2;H7C5H3	28S ribosomal protein S22, mitochondrial	MRPS22
27.734	27.6978	24.1661	27.5494	27.1888	27.3227			0.277748	1	-0.820991	-0.691067	0	A0A7P0TA34;A0A7P0T7Z2;Q9Y6D5;A0A7P0T9L9;A0A7P0T9L6;A0A7P0Z446;E5RJN9	A0A7P0TA34;A0A7P0T7Z2;Q9Y6D5;A0A7P0T9L9	Brefeldin A-inhibited guanine nucleotide-exchange protein 2	ARFGEF2
27.6151	27.9523	26.1557	27.2155	27.7676	27.8002			0.238723	1	-0.353418	-0.606143	0	A0A7P0Z4A5;A0A7P0T8D4;A0A7P0T8S8;A0A7P0T8Z2;A0A7P0T8C7;Q9Y5X1;A0A7P0T8Z7;A0A7P0TBI9;A0A7P0Z4A2;A0A7P0T8M2;A0A087WVE4;A0A087WZW2;A0A7P0T8L2	A0A7P0Z4A5;A0A7P0T8D4;A0A7P0T8S8;A0A7P0T8Z2;A0A7P0T8C7;Q9Y5X1;A0A7P0T8Z7;A0A7P0TBI9;A0A7P0Z4A2	Sorting nexin-9	SNX9
27.8492	28.2529	26.6849	27.6474	27.7893	27.679			0.0820689	1	-0.109584	-0.232156	0	A0A7P0T8N8;O14776;G3V220;Q5VWI1	A0A7P0T8N8;O14776;G3V220	Transcription elongation regulator 1	TCERG1
26.0985	26.4081	24.2617	27.6145	27.5627	27.5522			1.38357	0.158247	-1.98704	-2.96507	0	A0A7P0T9X2;B4DR67;A0A7P0TAL2;A0A7P0T901;A0A7P0T9B8;Q9Y673;A0A7P0T850;A0A7P0Z4I2;A0A7P0TB27;A0A7P0T882;A0A7P0T9C7;A0A7P0TA98;A0A7P0TAI2;A0A7P0T8X9	A0A7P0T9X2;B4DR67;A0A7P0TAL2;A0A7P0T901;A0A7P0T9B8;Q9Y673;A0A7P0T850;A0A7P0Z4I2;A0A7P0TB27;A0A7P0T882;A0A7P0T9C7	Dolichyl-phosphate beta-glucosyltransferase	ALG5
27.6621	27.7909	25.7537	27.0329	27.7141	27.2008			0.131732	1	-0.247019	-0.35811	0	A0A7P0T9D8;A0A7P0T9R3;A0A7P0T906;Q8IW45;A0A7P0TAU0	A0A7P0T9D8;A0A7P0T9R3;A0A7P0T906;Q8IW45	ATP-dependent (S)-NAD(P)H-hydrate dehydratase	CARKD
29.3207	29.8749	28.0138	29.8837	30.1977	29.9047			0.758756	0.51032	-0.925573	-1.65005	0	P27824;A0A7P0TAE9;A0A7P0T937;A0A7P0TB65;A0A7P0T9L0;A0A7P0T840;A0A7P0T8G1;A0A7P0Z4D6;D6RGY2;A0A7P0Z484;A0A7P0TAR9;A0A7P0Z4H2;D6RFL1;A0A7P0TAN9;A0A7P0T8N1;D6RAU8;D6RAQ8;D6RD16	P27824;A0A7P0TAE9;A0A7P0T937;A0A7P0TB65;A0A7P0T9L0;A0A7P0T840;A0A7P0T8G1;A0A7P0Z4D6;D6RGY2;A0A7P0Z484;A0A7P0TAR9;A0A7P0Z4H2	Calnexin	CANX
27.3704	27.8063	25.9993	26.9111	27.412	27.5004			0.138953	1	-0.21587	-0.375746	0	A0A7P0T9R9;A0A7P0T9E7;A0A7P0TAR1;P43155;A0A7P0TBF3;H0Y4Z7;A0A7P0TAQ4;B7ZBP5	A0A7P0T9R9;A0A7P0T9E7;A0A7P0TAR1;P43155;A0A7P0TBF3;H0Y4Z7;A0A7P0TAQ4	Carnitine O-acetyltransferase	CRAT
31.6556	32.138	30.6282	31.9248	31.8374	31.9356			0.403913	1	-0.425336	-0.953043	0	P07237;A0A7P0TA35;A0A7P0TB26;A0A7P0T9K9;A0A7P0T8J3;I3L3P5;A0A7P0TA71;A0A7P0T9U6;A0A7P0T8C0;I3L0S0;H7BZ94;I3L4M2;A0A7P0T8X1;A0A7P0TA97;H0Y3Z3;A0A7P0T9D6;I3L514;B3KTQ9;A0A7P0Z4S2;A0A7P0Z4J0;A0A7P0TAX9;A0A7P0TBP8;I3NI03;A0A7P0Z476;I3L3U6;A0A7P0T9S9;I3L1Y5;A0A7P0T9E3;A0A7P0T940;A0A7P0Z4B2;A0A7P0TBA3;A0A7P0Z4F8	P07237;A0A7P0TA35;A0A7P0TB26;A0A7P0T9K9;A0A7P0T8J3;I3L3P5;A0A7P0TA71;A0A7P0T9U6;A0A7P0T8C0;I3L0S0;H7BZ94;I3L4M2;A0A7P0T8X1;A0A7P0TA97;H0Y3Z3;A0A7P0T9D6;I3L514	Protein disulfide-isomerase	P4HB
28.6949	29.1715	26.7292	28.7337	28.7138	29.2092			0.376952	1	-0.687007	-0.89831	0	A0A7P0TA76;O95573;A0A7P0TB52;A0A7P0TBB1;A0A7P0T8L6;A0A7P0T905;H7BYZ7;A0A7P0TBL9;F5GWH2	A0A7P0TA76;O95573;A0A7P0TB52;A0A7P0TBB1;A0A7P0T8L6;A0A7P0T905;H7BYZ7	Long-chain-fatty-acid--CoA ligase 3	ACSL3
26.4717	27.7068	24.8352	26.5735	26.6353	26.5052			0.100679	1	-0.233418	-0.280382	0	A0A7P0TA78;A0A7P0TAC5;P42858;A0A7P0TAN5;A0A7P0Z417;A0A3B3ISR3;A0A3B3IU25;H0YA07	A0A7P0TA78;A0A7P0TAC5;P42858;A0A7P0TAN5;A0A7P0Z417	Huntingtin	HTT
29.8807	29.7661	29.9488	30.1749	30.5892	30.3204			1.69789	0.12945	-0.496335	-3.74408	0	A0A7P0TA85;P35613;A0A7P0TB04;I3L192;A0A087WUV8;A0A7P0T8A7;R4GMX5;R4GN83;A0A2R8YDZ0	A0A7P0TA85;P35613;A0A7P0TB04;I3L192;A0A087WUV8	Basigin	BSG
31.5988	31.9163	31.0924	31.8801	31.9509	32.1212			0.830092	0.439991	-0.448255	-1.79041	0	P14625;A0A7P0TAT8;H0YIV0;A0A7P0TAE1;A0A7P0T823;A0A087WT78;A0A7P0T917;A0A7P0TAY2;A0A7P0TBC2;A0A7P0T885;A0A7P0T8R3;A0A7P0Z405;F8W026;A0A7P0TAG4;A0A7P0Z4B4;A0A7P0T8C8;A0A7P0TAC2	P14625;A0A7P0TAT8;H0YIV0;A0A7P0TAE1;A0A7P0T823;A0A087WT78;A0A7P0T917;A0A7P0TAY2;A0A7P0TBC2	Endoplasmin	HSP90B1
27.1094	27.4851	26.3994	27.2417	27.2558	27.3834			0.387503	1	-0.295717	-0.919796	0	A0A7P0TAE3;Q9ULX6;A0A7P0TAJ5;A0A7P0T847;A0A7P0TBP0;V9GZ50;A0A7P0T9N5;A0A7P0TAD3;M0R1Y5;M0R010;M0QYT7	A0A7P0TAE3;Q9ULX6;A0A7P0TAJ5	A-kinase anchor protein 8-like	AKAP8L
29.2637	29.9875	27.4051	28.7082	29.2625	29.0636			0.0553056	1	-0.125979	-0.16028	0	H0YDD4;A0A7P0TBK2;A0A7P0TAG1;A0A7P0TAX2;A0A7P0TBE2;P10515;A0A7P0TA47;E9PEJ4;A0A7P0Z4G4;A0A7P0T997;A0A7P0Z423;A0A7P0T9N8;A0A7P0Z459	H0YDD4;A0A7P0TBK2;A0A7P0TAG1;A0A7P0TAX2;A0A7P0TBE2;P10515;A0A7P0TA47;E9PEJ4;A0A7P0Z4G4;A0A7P0T997	Acetyltransferase component of pyruvate dehydrogenase complex;Dihydrolipoyllysine-residue acetyltransferase component of pyruvate dehydrogenase complex, mitochondrial	DLAT
28.0686	28.7935	26.8466	27.944	27.6492	27.5447			0.119448	1	0.190267	0.327743	0	A0A7P0TBA9;P19525;A0A7P0TAL9;A0A7P0Z4M0	A0A7P0TBA9;P19525;A0A7P0TAL9;A0A7P0Z4M0	Interferon-induced, double-stranded RNA-activated protein kinase	EIF2AK2
32.1831	31.8938	31.3387	32.2194	32.4391	32.4455			1.02144	0.312351	-0.562806	-2.17588	0	A0A7P0Z497;P23284;A0A7P0TB45;A0A7P0T7U3	A0A7P0Z497;P23284;A0A7P0TB45	Peptidyl-prolyl cis-trans isomerase B	PPIB
28.3925	28.0261	27.0652	28.4216	28.4916	28.5582			0.766806	0.507162	-0.662544	-1.66582	0	E7EX90;A0A7P0Z4C3;A0A804CDA6;Q14203;Q6AWB1;E7EWF7;C9JZA4;C9JTE5;C9JJN7;C9JJD0;C9JKG6;E9PCY0;C9J1B7	E7EX90;A0A7P0Z4C3;A0A804CDA6;Q14203;Q6AWB1	Dynactin subunit 1	DCTN1;DKFZp686E0752
29.0828	29.7345	28.4188	29.3765	29.4488	29.4123			0.366831	1	-0.333831	-0.877617	0	A6PVN5;A0A804CD06;Q15257;F6WIT2;Q5T949;Q68CR8;B7ZBQ0;C9IZ76;A6PVN6;B7ZBP9;A6PVN7;B7ZBP7;A0A6Q8PH23;A6PVN8;B4DDQ6;H0Y6E5	A6PVN5;A0A804CD06;Q15257;F6WIT2;Q5T949;Q68CR8	Serine/threonine-protein phosphatase 2A activator	PPP2R4;DKFZp781M17165
27.0204	26.4081	24.5013	27.1134	26.7634	26.4524			0.438478	1	-0.799803	-1.02249	0	A0A804HJ64;F5H5B9;A0A804HHV2;A0A804HII8;A0A804HIJ2;A0A804HHU9;A0A804HJS0;A0A804HKA6;A0A804HL27;O95630;A0A804HJC8;C9JK83;A0A804HIF8;A0A804HI64;A0A804HKL2;A0A804HIV0	A0A804HJ64;F5H5B9;A0A804HHV2;A0A804HII8;A0A804HIJ2;A0A804HHU9;A0A804HJS0;A0A804HKA6;A0A804HL27;O95630;A0A804HJC8;C9JK83;A0A804HIF8;A0A804HI64	STAM-binding protein	STAMBP
28.0114	28.5218	26.1247	27.9217	27.7553	27.8736			0.151971	1	-0.297503	-0.407157	0	Q9BTW9;A0A804HL62;A0A804HIN6;A0A804HJ32;A0A804HLI2;A0A804HHW7;A0A804HIU1;A0A804HLF8;J3KR97;A0A804HKT8;A0A804HJY5;A0A804HI57;A0A804HI02;A0A804HJ57;A0A804HJU6;A0A0J9YWI5;A0A0J9YVR1;A0A804HIC0;A0A804HL21;A0A0J9YXU4;I3L120;I3L439;I3L163;I3L0V3;A0A804HKB9;I3L143;I3L131;I3L3H4;I3L4D2;A0A0J9YVU1;A0A804HJ99;I3L1S3;A0A0J9YYG2	Q9BTW9;A0A804HL62;A0A804HIN6;A0A804HJ32;A0A804HLI2;A0A804HHW7;A0A804HIU1;A0A804HLF8;J3KR97;A0A804HKT8;A0A804HJY5;A0A804HI57;A0A804HI02;A0A804HJ57;A0A804HJU6;A0A0J9YWI5;A0A0J9YVR1	Tubulin-specific chaperone D	TBCD
25.7095	26.3482	25.3824	25.8844	25.9794	26.08			0.22722	1	-0.167912	-0.580639	0	F2Z2B9;A0A804HI27;A0A804HL95;A0A804HJQ4;A0A804HJS9;A0A804HJ08;Q9BSJ2;A0A804HK74;A0A804HJH7;A0A804HLH6;A0A804HL05;R4GMM4	F2Z2B9;A0A804HI27;A0A804HL95;A0A804HJQ4;A0A804HJS9;A0A804HJ08;Q9BSJ2;A0A804HK74;A0A804HJH7	Gamma-tubulin complex component 2	TUBGCP2
29.9721	30.4598	29.032	30.1769	30.1392	30.08			0.300644	1	-0.310732	-0.73988	0	P42704;A0A804HKI2;A0A804HIG4;A0A804HKJ0;A0A804HJZ1;A0A804HI14;A0A804HKR3;A0A804HL40;A0A804HK30;A0A804HIN4;A0A804HLG8;A0A804HI40;A0A804HIQ7;A0A804HHY9;A0A804HJI0;A0A804HJH8;B8ZZ38;C9JCA9;A0A804HK02;A0A804HIV5;A0A0C4DG06;A0A804HKX0;A0A804HKR5;A0A804HJA1;A0A804HKK7;A0A804HKX6;A0A804HJG8;A0A804HI44;H7C3W8;A0A804HLK8;A0A804HLL8;A0A0C4DG51;Q9NP80	P42704;A0A804HKI2;A0A804HIG4;A0A804HKJ0;A0A804HJZ1;A0A804HI14;A0A804HKR3;A0A804HL40;A0A804HK30;A0A804HIN4;A0A804HLG8;A0A804HI40;A0A804HIQ7;A0A804HHY9;A0A804HJI0;A0A804HJH8;B8ZZ38;C9JCA9;A0A804HK02	Leucine-rich PPR motif-containing protein, mitochondrial	LRPPRC
26.9268	27.4321	25.7242	26.9391	27.0503	26.8274			0.182459	1	-0.244572	-0.478976	0	J3KN01;A0A804HJ20;P55196;A8MQ02;Q5TIG5;H0Y948;H0Y8U8;H0Y8L4;H0Y7R8;F8W9I4;E9PFY5;H0YA98	J3KN01;A0A804HJ20;P55196;A8MQ02;Q5TIG5	Afadin	MLLT4
28.6132	28.7	27.5563	28.8904	29.0512	28.8588			0.798689	0.478517	-0.643709	-1.72846	0	Q9HCC0;A0A804HJ24;A0A804HLJ9;A0A804HJ84;A0A804HKE8;A0A804HK37;A0A804HJ31;A0A804HJL2;A0A804HL02;A0A804HJC1;A0A804HHS4;A0A804HIH3;A0A0S2Z5R4;D6RDF7;A0A804HJW5;A0A804HKH3;D6R9R1;A0A804HJW2;A0A0G2JM88;D6RD67	Q9HCC0;A0A804HJ24;A0A804HLJ9;A0A804HJ84;A0A804HKE8;A0A804HK37;A0A804HJ31;A0A804HJL2;A0A804HL02;A0A804HJC1	Methylcrotonoyl-CoA carboxylase beta chain, mitochondrial	MCCC2
28.0715	29.3971	24.6968	29.4882	28.8507	28.4952			0.471903	0.980451	-1.55622	-1.08902	0	A0A804HJ86;Q9GZZ9;E7EQ61;C9JRV9;E7EWE1;C9J5W5;C9J0F6	A0A804HJ86;Q9GZZ9;E7EQ61;C9JRV9;E7EWE1;C9J5W5	Ubiquitin-like modifier-activating enzyme 5	UBA5
27.3809	27.884	24.8665	27.6822	27.4617	27.5731			0.388227	1	-0.86186	-0.921266	0	A0A804HJA4;J3KN16;Q5VYK3;R4GMY1;R4GMY3;F6XAQ5	A0A804HJA4;J3KN16;Q5VYK3;R4GMY1	Proteasome-associated protein ECM29 homolog	KIAA0368;ECM29
26.648	27.6856	24.5212	26.4872	26.6555	26.2072			0.0608763	1	-0.165061	-0.175507	0	A0A804HJM6;P31749;A0A087WY56;G3V3X1;A0A5F9ZGY0;A0A5F9ZHU3;A0A7P0T8T9;A0A5K1VW74;Q9Y243	A0A804HJM6;P31749	RAC-alpha serine/threonine-protein kinase	AKT1
27.1849	26.6796	24.6952	27.1118	26.9136	26.8954			0.443004	1	-0.787031	-1.03153	0	A0A804HJT7;B4DEQ0;A0A804HK05;A0A804HL84;Q16134;A0A804HL81;A0A804HJK8;A0A804HI80;A0A804HKB8;A0A804HI48;A0A804HI73;A0A804HI70;A0A804HK66	A0A804HJT7;B4DEQ0;A0A804HK05;A0A804HL84;Q16134;A0A804HL81;A0A804HJK8;A0A804HI80;A0A804HKB8;A0A804HI48;A0A804HI73	Electron transfer flavoprotein-ubiquinone oxidoreductase, mitochondrial	ETFDH
27.8924	28.1402	26.699	27.6508	27.6422	27.4778			0.00957044	1	-0.0130348	-0.0290661	0	A0A804HKH9;O00170;A0A804HKL7;A0A804HKK3;A0A804HIX8;A0A804HJ38;V9GYQ3;E9PMH2;A0A804HKP8;A0A804HJ46	A0A804HKH9;O00170;A0A804HKL7;A0A804HKK3;A0A804HIX8;A0A804HJ38;V9GYQ3;E9PMH2;A0A804HKP8	AH receptor-interacting protein	AIP
29.1117	29.0126	27.6379	28.902	29.0116	29.4037			0.446261	1	-0.518383	-1.03803	0	A0AV96;D6R9D6;B7Z8Z7;D6RBS9;D6REZ6;D6R9M7;D6RA49;D6RFL5;D6RBP6;D6RCT1;Q5T0W7;F8W9F8;Q8TBY0;Q9NQ94	A0AV96;D6R9D6;B7Z8Z7;D6RBS9;D6REZ6	RNA-binding protein 47	RBM47
28.594	29.1246	27.36	28.5386	28.6863	28.6457			0.193044	1	-0.264053	-0.503393	0	A0AVT1;H0Y8S8;H0Y9U5	A0AVT1	Ubiquitin-like modifier-activating enzyme 6	UBA6
27.0976	27.4911	26.5419	27.1847	27.6574	26.8137			0.181066	1	-0.175073	-0.475744	0	A0MZ66	A0MZ66	Shootin-1	KIAA1598
27.4962	28.4462	24.5916	27.822	27.9037	28.1482			0.405771	1	-1.11328	-0.956798	0	A1L0T0;M0R026;M0QZX5;E9PJS0;M0R1B5;E9PL44;E9PNL1	A1L0T0;M0R026	Acetolactate synthase-like protein	ILVBL
26.3421	27.4189	24.8863	26.2116	26.214	26.649			0.0663533	1	-0.142387	-0.190336	0	A3KMH1	A3KMH1	von Willebrand factor A domain-containing protein 8	VWA8
28.4846	28.8951	27.1247	28.6906	28.22	28.1713			0.125892	1	-0.192495	-0.343733	0	A5YKK6;H3BVC9;H3BMZ2;H3BNB1;H3BMH0;H3BT18;H3BTH2;H3BU44;H3BR89	A5YKK6	CCR4-NOT transcription complex subunit 1	CNOT1
26.1014	26.2903	24.3638	25.8882	26.1183	25.959			0.260512	1	-0.403343	-0.653847	0	A6NCC9;E9PME3;C9JHT9;C9JJV1;Q9Y5U2;E9PL88;C9JDU0	A6NCC9;E9PME3;C9JHT9;C9JJV1;Q9Y5U2;E9PL88;C9JDU0	Protein TSSC4	TSSC4
27.8347	28.6333	27.0169	27.5767	27.5874	27.5544			0.212388	1	0.255488	0.547398	0	A6NDG6;H3BV17	A6NDG6	Phosphoglycolate phosphatase	PGP
29.6649	29.4229	28.0462	29.1576	29.5444	29.6362			0.312351	1	-0.401396	-0.764583	0	A6NFX8;Q9UKK9;A6NJU6;A6NCQ0;H0YEY4;C9JYY9	A6NFX8;Q9UKK9;A6NJU6;A6NCQ0	ADP-sugar pyrophosphatase	NUDT5
28.1408	28.0472	24.7961	28.4457	28.4392	28.5602			0.605648	0.779694	-1.48697	-1.35139	0	A6NGJ0;P51808;F2Z328	A6NGJ0;P51808;F2Z328	Dynein light chain Tctex-type 3	DYNLT3
27.2696	27.6024	25.3988	27.4172	27.6628	27.7397			0.541713	0.89682	-0.849609	-1.22651	0	A6NHR9;J3KTL8;A0A2R8YE92;A0A2R8YCU7;J3KRK8;J3QSH1	A6NHR9;J3KTL8	Structural maintenance of chromosomes flexible hinge domain-containing protein 1	SMCHD1
26.2574	27.2302	25.4709	26.4894	26.0574	26.4855			0.0153968	1	-0.0245609	-0.0464626	0	A6NIH7	A6NIH7	Protein unc-119 homolog B	UNC119B
29.7129	28.2757	25.3787	30.07	30.0032	28.5463			0.568869	0.85274	-1.7507	-1.27963	0	A6NMQ3;Q5T5H1;O43768;A0A1W2PRU0	A6NMQ3;Q5T5H1;O43768;A0A1W2PRU0	Alpha-endosulfine	ENSA
26.1781	26.9309	26.5557	26.3965	26.5833	26.5978			0.0436689	1	0.0290216	0.127983	0	P49840;A8MT37;A0A7I2YQJ1;M0QYV0;A0A7I2V4Q6;A0A7I2V485;A0A7I2YQV9;A0A7I2YQM8;A0A7I2V4Z1;A0A7I2V2P9;A0A7I2V2J2;A0A7I2V4D4;A0A7I2V5S8;A0A7I2V2P0;A0A7I2YQ76;A0A7I2V3W5;A0A7I2YQA1;A0A7I2V3H9;A0A7I2V5Q2;A0A7I2V4Y3;A0A7I2V379	P49840;A8MT37	Glycogen synthase kinase-3 alpha	GSK3A
27.5426	25.8971	25.7193	27.4071	26.3272	26.8322			0.287538	1	-0.469164	-0.712024	0	O14972;A8MTY9;A8MY26	O14972;A8MTY9;A8MY26	Down syndrome critical region protein 3	DSCR3
27.4616	27.6343	25.1724	27.2952	27.9284	27.8957			0.507518	0.949503	-0.950328	-1.15936	0	A8MUM1;Q53HC9;F8WDS8;C9J0U9;D3YTH5;F8WDX0;F8WB12;C9JVR6	A8MUM1;Q53HC9;F8WDS8;C9J0U9;D3YTH5	Protein TSSC1	TSSC1
29.429	29.8992	25.024	29.7543	28.939	29.8173			0.367158	1	-1.38611	-0.878287	0	Q49AN9;F5H013;P62308;A8MWD9;C9JVQ0	Q49AN9;F5H013;P62308;A8MWD9	Small nuclear ribonucleoprotein G;Putative small nuclear ribonucleoprotein G-like protein 15	SNRPG;SNRPGP15
26.6178	27.2354	25.3634	26.4622	26.732	27.0065			0.223671	1	-0.327996	-0.572723	0	A8MXV4	A8MXV4	Nucleoside diphosphate-linked moiety X motif 19, mitochondrial	NUDT19
28.8677	29.4078	28.4685	28.985	28.8728	29.166			0.119098	1	-0.0932382	-0.326872	0	A9Z1X7;Q8IYB3;E9PCT1;M0R088;M0R1E7;M0QXG5	A9Z1X7;Q8IYB3;E9PCT1;M0R088	Serine/arginine repetitive matrix protein 1	SRRM1
29.0352	28.5257	29.4845	29.3173	29.6923	29.8052			0.87504	0.401965	-0.589771	-1.87962	0	B0QYK0;Q01844;A0A0D9SFL3;C9JGE3;H7BY36	B0QYK0;Q01844;A0A0D9SFL3;C9JGE3;H7BY36	RNA-binding protein EWS	EWSR1
29.3837	29.3113	28.7829	29.675	30.0105	29.9719			1.54331	0.136073	-0.726479	-3.34802	0	H3BQQ9;B0QYN7;P63279;H3BPC4;H3BRD1	H3BQQ9;B0QYN7;P63279;H3BPC4	SUMO-conjugating enzyme UBC9	UBE2I
27.2157	27.7489	24.1622	27.1085	27.6944	28.0336			0.465206	0.992556	-1.23663	-1.07573	0	B1AJQ6;Q86Y82	B1AJQ6;Q86Y82	Syntaxin-12	STX12
27.1928	26.2465	27.0139	27.681	27.7276	27.3117			1.11518	0.260331	-0.755707	-2.37139	0	B1AJY7;O75832;B1AJY5;B1AJY6	B1AJY7;O75832;B1AJY5;B1AJY6	26S proteasome non-ATPase regulatory subunit 10	PSMD10
29.3873	28.862	29.4306	29.7934	30.0012	30.1226			1.64733	0.133455	-0.745776	-3.61158	0	B1AK88	B1AK88		CAPZB
26.4058	26.1487	25.0025	28.1294	27.9423	27.5084			1.89171	0.0859683	-2.00772	-4.28155	0	B1AKC9;P29323;Q6NVW1;A0A7P0TBL4;A0A7P0TA58;A0A3B3IRY8;P54762;Q15375	B1AKC9;P29323	Receptor protein-tyrosine kinase;Ephrin type-B receptor 2	EPHB2
27.2874	27.7682	25.1615	26.6671	26.3315	26.5289			0.102451	1	0.22986	0.284907	0	B1ALA9;P60891;A0A2R8Y7H4;A0A6Q8PHK9;B1ALA7;A0A6Q8PGP2;A0A0A0MRQ9;A0A6Q8PHI4;A0A6Q8PEU0;A0A6Q8PG82;A0A6Q8PG13;A0A6Q8PGX9	B1ALA9;P60891;A0A2R8Y7H4	Ribose-phosphate pyrophosphokinase 1	PRPS1
28.6674	29.1261	28.6393	28.7323	28.7133	29.0034			0.00967497	1	-0.00539144	-0.0293801	0	B1ALK7;A0A2R8YG42;Q14155;E7EUY6;E9PDQ5;E7EU80;C9JDI6;B1ANY6;C9JAD7;E7ENL8;Q15052;F6SJA5	B1ALK7;A0A2R8YG42;Q14155;E7EUY6;E9PDQ5	Rho guanine nucleotide exchange factor 7	ARHGEF7
28.4451	28.8367	26.3533	28.8816	29.0569	28.6209			0.552547	0.892347	-0.974754	-1.24772	0	B3KS98;O15372;A0A087WZK9;E5RJT0;E5RFH0;E5RGU4;E5RFW7;E5RHC7;E5RH59	B3KS98;O15372;A0A087WZK9;E5RJT0	Eukaryotic translation initiation factor 3 subunit H	EIF3H
25.7068	27.2799	26.3796	27.2369	26.6865	27.0801			0.491127	0.962389	-0.545723	-1.12705	0	C9J5N1;B3KSP9;Q9BTE6;L7N2F4;K7N799;K7EQ85	C9J5N1;B3KSP9;Q9BTE6	Alanyl-tRNA editing protein Aarsd1	PTGES3L-AARSD1;AARSD1
28.3612	28.5212	27.6558	28.6218	28.4612	28.7064			0.689287	0.632355	-0.417055	-1.51433	0	H3BVI6;B4DDF4;B4DUT8;Q99439;A0A087X271;A0A087X1X5;K7ES69;H3BQH0;A0A087WV51;U3KPS3	H3BVI6;B4DDF4;B4DUT8;Q99439;A0A087X271;A0A087X1X5;K7ES69	Calponin;Calponin-2	CNN2
26.3369	27.2882	25.0912	27.1354	26.8425	26.4431			0.354335	1	-0.568246	-0.851946	0	H3BRY6;B4DVT3;B4DJL6;Q96SY0	H3BRY6;B4DVT3;B4DJL6;Q96SY0	von Willebrand factor A domain-containing protein 9	VWA9
30.9227	30.7621	29.4688	30.9287	31.1005	31.0659			0.629203	0.751286	-0.647177	-1.39728	0	O75390;B4DJV2;A0A0C4DGI3;H0YIC4;F8W4S1;H0YH82;F8VRP1;F8VX68;F8VPF9;F8VPA1;F8VTT8;F8W1S4;F8VX07;F8VWQ5;F8VRI6;F8VZK9;F8W642;F8VR34;F8VU34	O75390;B4DJV2;A0A0C4DGI3	Citrate synthase, mitochondrial;Citrate synthase	CS
25.2866	26.6879	25.4702	26.5221	26.4782	25.9328			0.445301	1	-0.496139	-1.03612	0	Q13610;B4DJV5;F8VZ56	Q13610;B4DJV5	Periodic tryptophan protein 1 homolog	PWP1
28.8178	28.5787	28.4031	28.7945	28.835	28.9604			0.947173	0.359631	-0.263451	-2.02437	0	B4DLN1;P52815	B4DLN1
28.2896	28.5128	27.9176	28.8077	29.3087	29.2789			1.70124	0.130154	-0.891798	-3.75297	0	B4DR80;Q9Y6E0;H0Y630;Q5JV98;Q5JV99	B4DR80;Q9Y6E0;H0Y630;Q5JV98	Serine/threonine-protein kinase 24;Serine/threonine-protein kinase 24 36 kDa subunit;Serine/threonine-protein kinase 24 12 kDa subunit	STK24
31.107	30.985	29.9143	30.9338	31.0486	31.0176			0.363501	1	-0.331267	-0.870789	0	B4DY09;Q12905;X6R6Z1;A0A0A0MRL0	B4DY09;Q12905	Interleukin enhancer-binding factor 2	ILF2
26.9697	27.9553	25.2237	26.9472	27.4661	27.0263			0.20384	1	-0.430255	-0.528048	0	B4DYU2;Q96MW5;H3BQV3;H3BMQ9;J3QRV3;H3BSH5	B4DYU2;Q96MW5;H3BQV3;H3BMQ9	Conserved oligomeric Golgi complex subunit 8	COG8
25.6826	26.2921	26.1986	27.1393	27.2557	26.951			2.14193	0.0502439	-1.05757	-5.05371	0	Q8NBY1;B4E0Y9;Q9P289	Q8NBY1;B4E0Y9;Q9P289	Serine/threonine-protein kinase 26	STK26
30.435	30.8895	29.9564	30.7708	30.7586	30.7106			0.519992	0.935095	-0.319676	-1.1839	0	P16422;B5MCA4;C9JKY3	P16422;B5MCA4	Epithelial cell adhesion molecule	EPCAM
26.7372	27.642	26.6959	26.4421	27.0127	26.6453			0.390627	1	0.325045	0.926139	0	O00541;B5MCF9;B3KXD6	O00541;B5MCF9;B3KXD6	Pescadillo homolog	PES1
25.6333	26.3294	25.1996	26.456	25.9354	26.0689			0.522061	0.935133	-0.432675	-1.18796	0	B5MD17;J3KS05;P83916;K7ELA4;C9JWS9	B5MD17;J3KS05;P83916;K7ELA4;C9JWS9	Chromobox protein homolog 1	CBX1
26.6239	27.7792	24.4912	27.2393	27.0402	26.4138			0.237242	1	-0.599649	-0.602874	0	E7EW69;E7EX04;B5ME97;Q9P0V9;F5H1F2;F5GYV2;C9JEW2;C9JNR7;C9JEQ7	E7EW69;E7EX04;B5ME97;Q9P0V9	Septin-10	45910
31.7488	32.6577	28.8475	31.8081	31.7012	31.4788			0.192162	1	-0.578086	-0.50137	0	H7C2W9;C9JU56;B7Z4E3;B7Z4C8;P62899;B8ZZK4	H7C2W9;C9JU56;B7Z4E3;B7Z4C8;P62899;B8ZZK4	60S ribosomal protein L31	RPL31
27.7034	28.3482	26.6633	27.3228	27.3991	27.8246			0.0369364	1	0.0561314	0.108979	0	B7Z6D5;Q96GQ7;A0A087X059;A0A087WYH5	B7Z6D5;Q96GQ7	Probable ATP-dependent RNA helicase DDX27	DDX27
27.7334	28.6096	27.1899	27.8657	28.2026	28.5142			0.315244	1	-0.349866	-0.770665	0	B7Z6J7;O75175;H7C3F5;A0A2H2FJL5;A0A2R8Y4W0;H0Y5X7;H7C148;A0A2R8Y6N5;A0A2R8Y691;A0A2R8Y7Z8;A0A0G2JNJ7	B7Z6J7;O75175;H7C3F5;A0A2H2FJL5;A0A2R8Y4W0;H0Y5X7;H7C148	CCR4-NOT transcription complex subunit 3	CNOT3
26.2773	25.933	25.0852	26.9214	26.8255	26.7451			1.38888	0.15765	-1.06552	-2.97741	0	B7Z7Q6;E9PNF7;P42785;B3KR26;A0A7P0Z451;E9PLY4;E9PL49;E9PQB5;E9PL85;E9PNJ1;E9PKN6;A0A7P0TB23	B7Z7Q6;E9PNF7;P42785;B3KR26;A0A7P0Z451;E9PLY4	Lysosomal Pro-X carboxypeptidase	PRCP
27.8489	28.3026	24.3776	27.23	27.9387	27.611			0.234618	1	-0.750184	-0.597069	0	B7ZAX5;Q01415;H0YLL8;H0YK10;H0YK30;H0YND3;H0YLL3;H0YNR7	B7ZAX5;Q01415;H0YLL8;H0YK10	N-acetylgalactosamine kinase	GALK2
26.8682	27.5298	25.7878	27.0523	27.33	27.0664			0.337128	1	-0.420963	-0.816359	0	B7ZC38;Q9NR46;B7ZC39;F8WFB9;G5E9J1;H7C1Z6	B7ZC38;Q9NR46;B7ZC39;F8WFB9	Endophilin-B2	SH3GLB2
26.1956	25.6366	25.0108	28.1237	27.6959	27.7681	+	3ha_huvec	2.44464	0.0197143	-2.24825	-6.12836	0	B8ZZC5;B8ZZA8	B8ZZC5;B8ZZA8		GLS
30.1071	30.0351	30.6298	31.2566	31.4886	31.4705	+	3ha_huvec	2.32739	0.0305455	-1.14787	-5.69205	0	B8ZZQ6;P06454;B8ZZA1;B8ZZW7;H7C2N1	B8ZZQ6;P06454;B8ZZA1;B8ZZW7;H7C2N1	Prothymosin alpha;Prothymosin alpha, N-terminally processed;Thymosin alpha-1	PTMA
27.3192	27.9213	26.4235	26.8733	27.2104	27.2855			0.0762466	1	0.098252	0.216785	0	B9A018;Q53GS9;A0A087X1B2;A0A087WW31;F8WC91	B9A018;Q53GS9;A0A087X1B2	U4/U6.U5 tri-snRNP-associated protein 2	USP39
26.9807	27.074	24.4941	26.62	26.8833	26.6799			0.255092	1	-0.544836	-0.642052	0	J3KMX2;B9EGA3;Q92925;J3QWB6;J3QQL7;Q6STE5	J3KMX2;B9EGA3;Q92925	SWI/SNF-related matrix-associated actin-dependent regulator of chromatin subfamily D member 2	SMARCD2
25.4753	27.4688	25.2361	26.4666	26.6893	26.8664			0.356421	1	-0.61403	-0.85624	0	C4AMC7;Q6VEQ5;A8K0Z3;A0A7I2YQU6;Q9NQA3	C4AMC7;Q6VEQ5;A8K0Z3;A0A7I2YQU6;Q9NQA3	Putative WAS protein family homolog 3;WAS protein family homolog 2;WAS protein family homolog 1;WAS protein family homolog 6	WASH3P;WASH2P;WASH1;WASH6P
28.359	27.9469	26.658	28.3035	28.3597	28.2234			0.552289	0.892379	-0.640884	-1.24722	0	C9IYN3;V9GYK2;Q8WVV9;B7WPG3;H7C464;H7BXH8;C9JJZ7	C9IYN3;V9GYK2;Q8WVV9;B7WPG3	Heterogeneous nuclear ribonucleoprotein L-like	HNRNPLL
28.2945	28.7956	26.9464	27.4748	27.8475	27.5327			0.281023	1	0.393864	0.698091	0	C9J050;C9JEJ2;P49585;H7C1T3;Q9Y5K3;H7BZN1;C9J2E1;C9JVS0;C9JPY0;F8WAZ5;F8WBU2;F2Z2B1	C9J050;C9JEJ2;P49585;H7C1T3;Q9Y5K3;H7BZN1;C9J2E1	Choline-phosphate cytidylyltransferase A;Choline-phosphate cytidylyltransferase B	PCYT1A;PCYT1B
28.1071	28.6372	28.0069	28.1015	28.5177	28.2959			0.0843388	1	-0.0546589	-0.238111	0	C9J0K6;P30626;B4DHQ6	C9J0K6;P30626;B4DHQ6	Sorcin	SRI
26.2532	25.8514	25.503	28.8367	28.5569	28.4175	+	3ha_huvec	3.40595	0.0177143	-2.73447	-10.9673	0	P84085;C9J1Z8;F8WDB3	P84085;C9J1Z8	ADP-ribosylation factor 5	ARF5
27.6764	28.0918	26.6649	27.5267	27.8361	27.7332			0.195829	1	-0.220926	-0.509777	0	P30876;C9J2Y9;C9J4M6	P30876;C9J2Y9;C9J4M6	DNA-directed RNA polymerase II subunit RPB2;DNA-directed RNA polymerase	POLR2B
28.6437	26.5291	24.9791	29.1818	28.6323	28.3618			0.856983	0.414369	-2.00799	-1.8437	0	C9J4Z3;P61513;M0R0A1;Q6P4E4;E9PEL3;M0R2L6;G5E9R3;A6NKH3	C9J4Z3;P61513;M0R0A1;Q6P4E4;E9PEL3;M0R2L6;G5E9R3	60S ribosomal protein L37a	RPL37A
27.5487	28.5595	26.0535	27.6481	27.9378	28.122			0.279905	1	-0.515432	-0.695695	0	C9J712;P35080;C9J0J7;C9JQ45;C9J2N0;G5E9Q6	C9J712;P35080;C9J0J7;C9JQ45;C9J2N0;G5E9Q6	Profilin-2;Profilin	PFN2
27.4419	26.7558	26.0213	27.6529	27.3467	27.6944			0.906828	0.376674	-0.825005	-1.94315	0	Q9Y5L0;C9J7E5;E9PFH4	Q9Y5L0;C9J7E5;E9PFH4	Transportin-3	TNPO3
27.466	27.8358	27.2431	28.0611	27.9111	27.7502			0.942604	0.359427	-0.392485	-2.01513	0	C9J8Q5;P51649;A0A5F9ZI23;A0A5F9ZH98	C9J8Q5;P51649;A0A5F9ZI23	Succinate-semialdehyde dehydrogenase, mitochondrial	ALDH5A1
27.5141	27.6022	25.09	27.4381	27.7959	27.7859			0.491597	0.963239	-0.937887	-1.12798	0	C9J8R4;C9JVE2;Q96GG9;C9JRU6;C9J0B2	C9J8R4;C9JVE2;Q96GG9;C9JRU6;C9J0B2	DCN1-like protein;DCN1-like protein 1	DCUN1D1
28.4838	26.2846	23.9363	29.4259	28.5168	28.8424			0.940345	0.360523	-2.69348	-2.01057	0	Q14061;C9J8T6;H7C4E5	Q14061;C9J8T6;H7C4E5	Cytochrome c oxidase copper chaperone	COX17
29.462	29.8641	27.3908	29.1198	29.174	28.6169			0.0275644	1	-0.0645835	-0.0821113	0	C9JA08;Q96D46;C9IZW9;C9K0C2;C9J0B9;C9IY70	C9JA08;Q96D46	60S ribosomal export protein NMD3	NMD3
29.7559	29.6113	29.0289	29.6889	29.5922	29.5306			0.240603	1	-0.138481	-0.61029	0	C9JBI3;P78330;A0A1D5RMN5;C9JEJ7;F8WD74	C9JBI3;P78330	Phosphoserine phosphatase	PSPH
29.8325	30.452	28.2649	30.2467	30.4201	29.9093			0.432999	1	-0.675588	-1.01153	0	C9JIF9;P13798;H7C393;H7C1U0;C9JLK2;F8WEH5	C9JIF9;P13798;H7C393;H7C1U0	Acylamino-acid-releasing enzyme	APEH
28.0895	27.896	24.8483	28.4685	27.9789	28.096			0.511188	0.942573	-1.23654	-1.16659	0	C9JLU1;P52434	C9JLU1;P52434	DNA-directed RNA polymerases I, II, and III subunit RPABC3	POLR2H
28.3652	28.9456	27.3485	28.3062	28.2584	28.0581			0.00847309	1	0.0121841	0.0257648	0	F2Z2Y6;C9JNV3;O95777;C9JIZ0	F2Z2Y6;C9JNV3;O95777;C9JIZ0	U6 snRNA-associated Sm-like protein LSm8	LSM8
30.1061	30.0389	30.0083	29.9252	30.0802	30.2792			0.153634	1	-0.0437635	-0.411133	0	C9JXB8;C9JNW5;P83731	C9JXB8;C9JNW5;P83731	60S ribosomal protein L24	RPL24
26.6523	27.7028	26.3578	27.8559	27.0377	27.0388			0.342855	1	-0.406516	-0.828234	0	C9JQ41;H7C525;Q4VC31	C9JQ41;H7C525;Q4VC31	Coiled-coil domain-containing protein 58	CCDC58
26.8352	27.6649	25.294	27.0619	27.1033	26.9784			0.257226	1	-0.449837	-0.646701	0	C9JQD4;O43447;A0A7I2YQS4;H0YEL5;A0A7I2V5V0;A0A7I2V2H6;A0A7I2V343	C9JQD4;O43447;A0A7I2YQS4;H0YEL5	Peptidyl-prolyl cis-trans isomerase;Peptidyl-prolyl cis-trans isomerase H	PPIH
28.1677	28.685	24.3461	27.5667	27.8073	28.0896			0.212861	1	-0.755003	-0.548466	0	E7EUY3;E9PDR0;C9JQS9;E7EX59;P05166;F8WBI9;E9PEC3;E7ETT4;E7ETT1;E7ENC1;C9JAW3;C9JVW9;H7C5C9	E7EUY3;E9PDR0;C9JQS9;E7EX59;P05166;F8WBI9;E9PEC3;E7ETT4;E7ETT1;E7ENC1	Propionyl-CoA carboxylase beta chain, mitochondrial	PCCB
27.4959	26.1183	24.9316	27.5253	27.4298	27.0137			0.685236	0.642447	-1.141	-1.50643	0	C9JQV0;Q9BRJ6;H7C0T1;H7C2R9	C9JQV0;Q9BRJ6;H7C0T1;H7C2R9	Uncharacterized protein C7orf50	C7orf50
26.6733	26.737	25.7295	26.4811	27.2867	27.5499			0.726106	0.562448	-0.725942	-1.58617	0	C9JRJ5;Q9UGP4	C9JRJ5;Q9UGP4	LIM domain-containing protein 1	LIMD1
29.0289	28.6954	27.0282	26.1714	28.4179	29.1182			0.117002	1	0.348349	0.321639	0	C9JRZ6;Q9NX63;F8WAR4;A0A286YEX5	C9JRZ6;Q9NX63;F8WAR4;A0A286YEX5	MICOS complex subunit MIC19	CHCHD3
29.4544	29.3945	29.1186	29.571	29.6055	29.7585			1.2776	0.202452	-0.322456	-2.72395	0	P35998;C9JX88;C9JLS9	P35998;C9JX88	26S protease regulatory subunit 7	PSMC2
27.6408	26.7482	24.6903	27.1565	27.4655	27.5971			0.520512	0.934983	-1.04662	-1.18492	0	C9JXZ5;Q9BV40;B8ZZT4	C9JXZ5;Q9BV40;B8ZZT4	Vesicle-associated membrane protein 8	VAMP8
29.5869	29.134	29.5428	29.6187	29.5101	29.6384			0.488502	0.960276	-0.167842	-1.12186	0	C9JYQ9;H0Y8C2;Q6P5R6	C9JYQ9;H0Y8C2;Q6P5R6	60S ribosomal protein L22-like 1	RPL22L1
26.1894	26.6171	25.0174	26.7562	27.2188	27.1207			1.02735	0.314265	-1.09059	-2.18804	0	H7C4M9;C9JZG9;C9JZY6;P62256;C9J8Q9	H7C4M9;C9JZG9;C9JZY6;P62256;C9J8Q9	Ubiquitin-conjugating enzyme E2 H	UBE2H
29.0634	29.4303	28.536	29.2526	29.4013	29.3463			0.543154	0.897753	-0.323507	-1.22933	0	C9JZR2;H0YC95;O60716;A0A669KB05;A0A669KB62;A0A804HIL4;A0A804HK15;A0A804HJM1;E9PKY0;E9PKL1	C9JZR2;H0YC95;O60716;A0A669KB05;A0A669KB62	Catenin delta-1	CTNND1
31.0791	31.1852	30.9406	30.9417	30.8098	31.1365			0.373763	1	0.105601	0.891799	0	D3YTB1;F8W727;P62910;D3YTI8	D3YTB1;F8W727;P62910	60S ribosomal protein L32	RPL32
28.6414	29.4232	26.5843	28.7111	29.017	28.9865			0.33309	1	-0.688539	-0.807966	0	D6R938;Q13557;E9PBG7;E9PF82;H0Y9J2;A0A5F9ZHY2;A0A5K1VW76;A0A804HIC9;A0A5F9ZHM9;A0A5F9ZH21;A0A5F9ZHR5;D6RFJ0;A0A5F9ZH50;Q9UQM7	D6R938;Q13557;E9PBG7;E9PF82	Calcium/calmodulin-dependent protein kinase type II subunit delta	CAMK2D
31.398	31.3464	30.1352	32.0608	31.0574	30.951			0.295894	1	-0.396545	-0.72981	0	D6R9P3;D6RD18;D6RBZ0;Q99729	D6R9P3;D6RD18;D6RBZ0;Q99729	Heterogeneous nuclear ribonucleoprotein A/B	HNRNPAB
27.5602	28.2332	26.9001	27.5032	27.5633	28.067			0.126666	1	-0.146667	-0.345644	0	D6RB81;Q9UHK6;V9GZ45;V9GYP4;V9GYU9	D6RB81;Q9UHK6	Alpha-methylacyl-CoA racemase	AMACR
27.1327	27.7297	24.9006	27.5428	26.9779	27.264			0.314491	1	-0.673923	-0.769082	0	D6RCD0;Q8NBQ5	D6RCD0;Q8NBQ5	Estradiol 17-beta-dehydrogenase 11	HSD17B11
31.8975	32.5286	31.2829	32.1397	32.2416	32.157			0.312937	1	-0.276438	-0.765817	0	D6RCD7;P38646;A0A7I2V2G2;A0A7I2V3F7;A0A7I2V2S7;A0A7I2YQB2;H0Y8K0;A0A3B3ITI4;H0Y8S0	D6RCD7;P38646;A0A7I2V2G2;A0A7I2V3F7;A0A7I2V2S7;A0A7I2YQB2;H0Y8K0	Stress-70 protein, mitochondrial	HSPA9
26.4464	26.39	26.1247	27.2797	27.6855	26.8307			1.62423	0.135912	-0.944974	-3.552	0	D6REB4;Q9H074	D6REB4;Q9H074	Polyadenylate-binding protein-interacting protein 1	PAIP1
29.2011	29.4618	27.6997	29.471	29.8825	29.8075			0.761445	0.509242	-0.932772	-1.65532	0	D6RGI3;D6RER5;Q9NVA2;D6RDU5;H0Y961;D6RDP1;D6R9Y6;H0Y9G8	D6RGI3;D6RER5;Q9NVA2;D6RDU5	Septin-11	45911
25.9469	26.7279	24.5409	26.4339	26.5248	26.3508			0.471062	0.982314	-0.697927	-1.08735	0	D6RGY8;D6RFI3;E7EQR8;Q9GZM5;H0Y9A1	D6RGY8;D6RFI3;E7EQR8;Q9GZM5;H0Y9A1	Protein YIPF3;Protein YIPF3, 36 kDa form III	YIPF3
29.3401	28.7927	29.2968	29.4147	29.3517	29.5053			0.706884	0.597441	-0.280689	-1.54864	0	D6RFM5;P31040;A0A087X1I3;A0A494C1T6;H0Y8X1	D6RFM5;P31040;A0A087X1I3	Succinate dehydrogenase [ubiquinone] flavoprotein subunit, mitochondrial	SDHA
27.1317	26.9905	26.2253	27.1556	26.6995	27.428			0.369919	1	-0.311836	-0.883939	0	D6RHI9;O00584;D6REQ6;A0A804HKZ2;A0A804HJZ7;H0YAE9;A0A087WZM2;A0A804HJ89;J3QQ64	D6RHI9;O00584;D6REQ6;A0A804HKZ2;A0A804HJZ7;H0YAE9;A0A087WZM2	Ribonuclease T2	RNASET2
28.6964	29.5322	24.0347	29.2847	29.3378	28.618			0.407998	1	-1.6591	-0.961293	0	E5RGN3;E5RIM7;O00244	E5RGN3;E5RIM7;O00244	Copper transport protein ATOX1	ATOX1
27.4775	27.1641	25.6974	27.6817	27.0707	27.3861			0.447626	1	-0.59981	-1.04076	0	O60925;E5RGS4;D6RGG5	O60925;E5RGS4	Prefoldin subunit 1	PFDN1
26.499	25.8544	25.1937	26.7405	26.4637	26.7732			0.974824	0.332828	-0.810088	-2.08046	0	E5RH53;Q96DB5;H0YB03;H0YB83;H0YC67;H0YC27;H0YBD9;E5RGC8;H0YAP5	E5RH53;Q96DB5;H0YB03;H0YB83;H0YC67	Regulator of microtubule dynamics protein 1	RMDN1
28.9066	28.4297	28.7908	29.3873	29.316	29.8101			1.70935	0.129195	-0.795406	-3.77454	0	Q15369;E5RHG8;R4GMY8	Q15369;E5RHG8;R4GMY8	Transcription elongation factor B polypeptide 1	TCEB1
32.1127	32.5512	31.5248	31.7562	31.8301	31.9786			0.274015	1	0.207951	0.683043	0	E5RI99;P62888;A0A0B4J213;E5RJH3;A0A0C4DH44	E5RI99;P62888	60S ribosomal protein L30	RPL30
30.2268	29.3356	29.9787	30.2909	30.0802	30.3484			0.637805	0.73619	-0.392771	-1.41404	0	E5RIW3;E5RJD8;O75347;E5RHG6;E5RIX8;A0A494C144	E5RIW3;E5RJD8;O75347;E5RHG6	Tubulin-specific chaperone A	TBCA
27.681	28.5349	27.0353	27.9195	28.0198	27.6158			0.0791872	1	-0.10127	-0.224566	0	Q7L5N1;E7EM64;H7C3T0	Q7L5N1;E7EM64	COP9 signalosome complex subunit 6	COPS6
26.9543	27.5881	26.7556	27.2234	27.519	27.0928			0.253033	1	-0.179094	-0.637557	0	E7EMZ9;E9PBC6;O95359;Q4VXL4;D6RAA5;Q4VXL8;H0Y911;E9PGB3;A0A0U1RRM9;H0YA73;H0Y9C3;H0Y9Y7;H0Y954;H0Y8P9	E7EMZ9;E9PBC6;O95359;Q4VXL4;D6RAA5;Q4VXL8	Transforming acidic coiled-coil-containing protein 2	TACC2
28.8079	29.2234	27.6403	29.2316	29.1347	28.965			0.503779	0.950865	-0.553237	-1.152	0	E7EV99;E7ENY0;P35611;A0A804HL01;H0Y9H2;A0A0A0MSR2;D6RF25;D6RJE2;H0YFD8;D6RAH3;H0YG19	E7EV99;E7ENY0;P35611;A0A804HL01;H0Y9H2	Alpha-adducin	ADD1
30.8647	31.0558	30.239	30.5602	30.7607	30.6724			0.0769367	1	0.055397	0.218615	0	E7EPB3;P50914	E7EPB3;P50914	60S ribosomal protein L14	RPL14
29.6633	29.6054	29.1305	29.7276	30.0132	29.7395			0.86955	0.408198	-0.360357	-1.86869	0	E7ES33;E7EPK1;Q16181;G3V1Q4;A0A0U1RRE1;A0A0U1RRH9;A0A5F9ZGZ7;Q5JXL7;A0A0U1RRD1;A0A0U1RRM2;Q6ZU15	E7ES33;E7EPK1;Q16181;G3V1Q4	Septin-7	45907
27.363	27.6013	26.7157	27.3299	27.458	27.5254			0.319595	1	-0.211118	-0.779791	0	E7EPN9;Q9Y520;A0A2R8YET2;A0A2R8Y7F4;H7C5N8;A0A0A0MS30;A0A2R8Y424	E7EPN9;Q9Y520	Protein PRRC2C	PRRC2C
28.9465	29.9686	25.9578	28.953	28.7458	28.6785			0.155569	1	-0.501454	-0.415755	0	E7EPT4;P19404	E7EPT4;P19404	NADH dehydrogenase [ubiquinone] flavoprotein 2, mitochondrial	NDUFV2
28.5118	28.6709	27.6195	28.6057	28.8584	28.7192			0.616851	0.763628	-0.460386	-1.37322	0	E7EQ69;Q9GZZ1;C9J5D1;A0A087WWJ2;B0AZT5;C9JZU6;F8WCK0;C9J5J3;A0A0D9SF32	E7EQ69;Q9GZZ1;C9J5D1;A0A087WWJ2	N-alpha-acetyltransferase 50	NAA50
31.3165	31.2442	29.916	31.1682	31.1964	31.4431			0.405865	1	-0.44363	-0.956987	0	E7EQR4;P15311;E9PQ82;E9PNV3;V9GZ54;A0A2R8Y5P0;E9PNP4	E7EQR4;P15311	Ezrin	EZR
28.4169	28.6059	28.5462	28.9866	29.4686	29.753			1.725	0.13063	-0.879737	-3.8164	0	E9PES6;E7ES08;E7EQU1;O15347	E9PES6;E7ES08;E7EQU1;O15347	High mobility group protein B3	HMGB3
27.162	27.1914	25.1325	26.0916	26.4549	26.3254			0.107106	1	0.20466	0.296739	0	Q05397;E7ESA6;H0YBP1;H0YBZ1;H0YB16;E9PEI4;B4DWJ1;E5RHD8;E5RI03;H0YB99;E5RJQ2;E5RGA6;E5RG80;E5RIK4;E5RG54;E5RJP0;E5RFW9;E5RI72;E5RG66;E5RH01;E5RH48;H0YAS0;H0YB33	Q05397;E7ESA6;H0YBP1;H0YBZ1;H0YB16;E9PEI4;B4DWJ1	Focal adhesion kinase 1	PTK2
27.1098	27.5923	25.0357	27.0096	27.2238	27.1585			0.282265	1	-0.551355	-0.700752	0	E7ESY4;Q13330;H0Y4T7;F8W9Y9;H7C3F3;H0YIT0	E7ESY4;Q13330;H0Y4T7	Metastasis-associated protein MTA1	MTA1
27.8879	27.5225	26.9343	27.9927	27.8177	28.1051			0.837406	0.431442	-0.523606	-1.80488	0	E7ETB3;E5RIA4;Q9ULA0;E7EMB6;C9JBE1;B9ZVU2;F8WAN0;E7EPX3;E5RHR3;E5RJ35;C9JRG3;C9J1E2	E7ETB3;E5RIA4;Q9ULA0;E7EMB6;C9JBE1	Aspartyl aminopeptidase	DNPEP
29.2141	29.7297	28.1893	28.909	29.0964	28.8512			0.0702912	1	0.0921618	0.200915	0	P12081;E7ETE2;A0A6Q8PF47;A0A6Q8PHA5;A0A6Q8PFF2;B4DDD8;A0A6Q8PHE3;A0A6Q8PF07;B4E1C5;A0A6Q8PFN6;A0A6Q8PFG9;A0A6Q8PHQ0;A0A2R8Y5E8;A0A2R8Y4X6;D6RF05;A0A2R8YCI2;A0A2R8YFR1	P12081;E7ETE2;A0A6Q8PF47;A0A6Q8PHA5;A0A6Q8PFF2;B4DDD8;A0A6Q8PHE3;A0A6Q8PF07;B4E1C5;A0A6Q8PFN6;A0A6Q8PFG9	Histidine--tRNA ligase, cytoplasmic	HARS
27.103	27.6019	25.4148	27.0662	26.6606	27.4902			0.200178	1	-0.36576	-0.519713	0	H0Y9G6;E7ETU7;P09001;E9PF06;D6RC14;D6RBQ5	H0Y9G6;E7ETU7;P09001;E9PF06;D6RC14	39S ribosomal protein L3, mitochondrial	MRPL3
28.4443	28.9377	27.6515	28.0603	28.1546	28.4707			0.105963	1	0.115964	0.293841	0	E7ETZ4;Q9Y6E2;B5MCH7;B5MCE7;Q75MG1;E7EMS9;E9PFE3;C9JF98;F8WDX8;E9PFD4	E7ETZ4;Q9Y6E2;B5MCH7;B5MCE7;Q75MG1	Basic leucine zipper and W2 domain-containing protein 2	BZW2
28.6674	29.1574	27.4574	29.0417	28.9293	29.0176			0.489268	0.961066	-0.568817	-1.12338	0	E7EVA0;A0A804HKE7;P27816;H7C4C5;H7C456;B5MEG9;H0Y2V1;F8W9U4;A0A0J9YVV8;A0A0J9YW37	E7EVA0;A0A804HKE7;P27816	Microtubule-associated protein;Microtubule-associated protein 4	MAP4
28.2621	28.1788	26.607	28.5238	28.373	28.627			0.691597	0.629621	-0.825329	-1.51883	0	G5E9S8;G3V2E7;F8W6L3;G3V3H3;G3V5R9;E7EVH7;Q07866;G3V2P7;H0YG16;H0YJU9;H0YJL0;H0YJT3;H0YGB8	G5E9S8;G3V2E7;F8W6L3;G3V3H3;G3V5R9;E7EVH7;Q07866	Kinesin light chain 1	KLC1
27.9395	28.0212	28.4924	28.0357	28.1423	27.8747			0.284722	1	0.133476	0.706009	0	E7EWR4;P33240;E9PID8;A0A0A0MT56	E7EWR4;P33240;E9PID8	Cleavage stimulation factor subunit 2	CSTF2
28.4296	28.263	27.9478	28.8971	28.7756	28.9656			1.92776	0.0780667	-0.665989	-4.38704	0	E7EX17;P23588;F8VSC7;F8VP89;F8W0K0;F8VX11;F8VRU1;F8VYE9	E7EX17;P23588;F8VSC7;F8VP89;F8W0K0;F8VX11	Eukaryotic translation initiation factor 4B	EIF4B
27.3031	27.706	27.0218	27.4273	27.6879	27.3151			0.229547	1	-0.133094	-0.585816	0	E9PC15;Q53H12;A0A3B3ISZ0;A0A3B3ITD0;A0A3B3ISY9;A0A3B3ITX7;E9PG39;A0A0G2JLG5;A0A3B3IS09;A0A3B3IUC9;A0A3B3ITV0	E9PC15;Q53H12;A0A3B3ISZ0;A0A3B3ITD0;A0A3B3ISY9;A0A3B3ITX7;E9PG39	Acylglycerol kinase, mitochondrial	AGK
27.0777	28.01	25.9479	26.9654	26.9426	26.9499			0.0335397	1	0.0592035	0.0992984	0	E9PCB6;Q9BYT8;H0YAK4;H0YAF7	E9PCB6;Q9BYT8;H0YAK4	Neurolysin, mitochondrial	NLN
27.173	27.0908	25.5919	27.4309	27.2193	27.616			0.69529	0.620215	-0.803469	-1.52603	0	E9PD53;Q9NTJ3;C9JR83;C9J9E4;C9JVD8;C9J578;C9JWF0;C9IYK2;C9JJ64	E9PD53;Q9NTJ3	Structural maintenance of chromosomes protein;Structural maintenance of chromosomes protein 4	SMC4
28.5802	29.0144	26.8749	28.4417	28.7119	28.4865			0.23266	1	-0.390178	-0.59273	0	E9PDF6;O43795;E7EQD9;H7C2Y7;A0A0U1RRI3;C9JYW1;C9JUP5;C9K0I9;G3V342	E9PDF6;O43795	Unconventional myosin-Ib	MYO1B
26.549	25.9524	24.7681	25.9644	26.6826	26.375			0.445836	1	-0.584119	-1.03719	0	E9PER6;Q6A1A2;O15530;H3BPW1;H3BQ10	E9PER6;Q6A1A2;O15530	Putative 3-phosphoinositide-dependent protein kinase 2;3-phosphoinositide-dependent protein kinase 1	PDPK1;PDPK2P
27.9572	28.1889	27.1549	27.8713	27.8086	28.0053			0.14987	1	-0.128114	-0.402117	0	E9PF10;O75694	E9PF10;O75694	Nuclear pore complex protein Nup155	NUP155
27.8281	28.4885	27.4227	28.1927	27.8848	27.9702			0.115305	1	-0.102797	-0.317392	0	E9PFR3;Q14738;H0Y8C4;H7C5Q9;H0YJ35;H0YJ49	E9PFR3;Q14738;H0Y8C4	Serine/threonine-protein phosphatase 2A 56 kDa regulatory subunit delta isoform	PPP2R5D
29.158	29.646	29.186	29.3481	29.4937	29.4553			0.246789	1	-0.102377	-0.623892	0	E9PGT3;Q15418;Q5SVM6;Q5SVM7;E9PMM7;E9PAN7;D6R910;D6RHW7;V9GXZ1;E7ERL6;A0A669KBJ4;Q96GX5;Q9Y2H9;Q6P0Q8;O15021	E9PGT3;Q15418	Ribosomal protein S6 kinase;Ribosomal protein S6 kinase alpha-1	RPS6KA1
27.4083	28.2581	25.4426	26.9901	27.2728	27.4108			0.0787166	1	-0.188245	-0.223323	0	Q99627;E9PGT6;H7C3S9	Q99627;E9PGT6;H7C3S9	COP9 signalosome complex subunit 8	COPS8
29.3546	29.6112	25.0446	29.2048	29.4605	29.3863			0.3818	1	-1.34705	-0.908193	0	E9PH64;Q9Y6M9;A0A7I2V620;A0A3B3IT57;E7EWZ0;E9PF49;A0A7I2YQN0	E9PH64;Q9Y6M9;A0A7I2V620;A0A3B3IT57;E7EWZ0;E9PF49	NADH dehydrogenase [ubiquinone] 1 beta subcomplex subunit 9	NDUFB9
26.4474	27.274	25.6253	26.6737	26.5391	26.7095			0.149302	1	-0.191858	-0.400753	0	E9PHT6;Q9NVE7;H0YA26;H0Y9E4	E9PHT6;Q9NVE7;H0YA26;H0Y9E4	Pantothenate kinase 4	PANK4
30.8574	31.138	29.7959	30.9166	30.9998	31.0493			0.404177	1	-0.391476	-0.953578	0	E9PHY5;O43491;E9PK52;E9PII3;A0A2R8Y5B3;Q6R5J7;H0Y5B0;E9PQD2;E9PMV8;E9PQN0;E9PRG1;E9PIG0;A0A1B0GTF8;A0A0A0MRA8;A8K968;E9PJP4;E9PMG5;Q6ZSX4;Q9Y2J2;E9PN54;A0A0A0MSA4;E9PPC9;J3QS55;J3KT37	E9PHY5;O43491;E9PK52;E9PII3;A0A2R8Y5B3	Band 4.1-like protein 2	EPB41L2
27.4145	28.2316	25.9356	27.6381	27.3237	26.9658			0.0569687	1	-0.115294	-0.164841	0	E9PIN3;Q9UBU9;B4E227;E9PLA7	E9PIN3;Q9UBU9;B4E227	Nuclear RNA export factor 1	NXF1
28.8637	29.6765	24.7831	28.851	28.3051	28.6667			0.212322	1	-0.833155	-0.547251	0	E9PJ81;E9PRQ7;Q04323;A0A087WTZ5;E9PS08	E9PJ81;E9PRQ7;Q04323;A0A087WTZ5	UBX domain-containing protein 1	UBXN1
26.4514	27.8634	23.8307	26.8469	26.6081	27.3399			0.298522	1	-0.88313	-0.735385	0	H7BXH2;E9PKF6;Q5H9R7;E9PK08;E9PQP7;E9PNN8;H0YEN2;E9PJD8;E9PKG4;H0YDK9;H0YDW1	H7BXH2;E9PKF6;Q5H9R7	Serine/threonine-protein phosphatase 6 regulatory subunit 3	PPP6R3
30.3585	30.3619	29.6406	30.7238	30.8059	30.7203			1.2249	0.220589	-0.629677	-2.60744	0	E9PKG1;Q99873;E9PIX6;E9PQ98;H0YDE4;E9PNR9;Q9NR22;E9PMW9	E9PKG1;Q99873;E9PIX6;E9PQ98;H0YDE4;E9PNR9	Protein arginine N-methyltransferase 1	PRMT1
27.4237	28.1246	26.8083	27.2367	27.0239	27.9817			0.0266998	1	0.0380866	0.0796074	0	E9PKP7;P17480;E9PLT2;E9PMM2	E9PKP7;P17480	Nucleolar transcription factor 1	UBTF
26.5108	27.3425	26.2346	25.4049	27.0378	26.9886			0.127112	1	0.21888	0.346745	0	E9PKY5;Q9UNP9;E9PEQ6;E9PIB0;E9PK21	E9PKY5;Q9UNP9;E9PEQ6	Peptidyl-prolyl cis-trans isomerase;Peptidyl-prolyl cis-trans isomerase E	PPIE
29.3537	29.8328	28.668	29.6787	29.7691	29.56			0.48732	0.960715	-0.384423	-1.11953	0	P55786;E9PLK3;A0A7I2V3W8;A0A7I2V389;E9PPZ2;A6NEC2;A0A7I2V604;H0YDG0;E9PP11;E9PPD4;E9PJ74;E9PJY4;H0YCQ5;E9PRQ5;A0A7I2V5D4;A0A7I2V5M8;E9PI82;A0A7I2YQS3;E9PJF9	P55786;E9PLK3;A0A7I2V3W8;A0A7I2V389	Puromycin-sensitive aminopeptidase	NPEPPS
31.5835	30.8821	30.8162	31.8513	31.6235	31.6467			1.12673	0.253288	-0.613256	-2.39586	0	E9PLL6;P46776;E9PJD9;E9PLX7	E9PLL6;P46776;E9PJD9	60S ribosomal protein L27a	RPL27A
27.9587	28.2671	27.7255	28.667	28.4944	28.6781			1.7008	0.128506	-0.629408	-3.7518	0	E9PM92;O00193;E9PRZ9;E9PQA1	E9PM92;O00193;E9PRZ9	Small acidic protein	C11orf58;SMAP
25.7063	26.2163	27.2197	27.4613	28.1706	27.8403			1.37646	0.161108	-1.44333	-2.94858	0	E9PMI6;J3KN38;P54105;E9PJF4;E9PQ83	E9PMI6;J3KN38;P54105;E9PJF4	Methylosome subunit pICln	CLNS1A
26.3113	26.8876	26.3187	26.0231	26.9485	26.6826			0.0465353	1	-0.0455367	-0.136002	0	E9PMS6;Q8WWI1;J3KP06;F8WD26;E9PMT2;A0A0A0MTE2;E9PMP7;H0Y424;H0YDG6;E9PLU6;E9PJ10;H0YE95;E9PK58;H0YDQ3;E9PRJ0;E9PRE3;E9PMJ6	E9PMS6;Q8WWI1;J3KP06;F8WD26;E9PMT2;A0A0A0MTE2;E9PMP7;H0Y424	LIM domain only protein 7	LMO7
29.3275	29.5761	28.4421	29.2707	29.493	29.5148			0.368627	1	-0.310973	-0.881294	0	E9PPJ0;Q13435;E9PJT3;E9PJ04;H0YCG1;H0YEX5;E9PIL8	E9PPJ0;Q13435	Splicing factor 3B subunit 2	SF3B2
26.3571	26.4758	25.6612	26.3965	26.4534	26.1242			0.229028	1	-0.15998	-0.584664	0.00021749	E9PPQ4;G3V1D1;G3V192;P02794;E9PRK8;E9PKY7	E9PPQ4;G3V1D1;G3V192;P02794;E9PRK8;E9PKY7	Ferritin;Ferritin heavy chain;Ferritin heavy chain, N-terminally processed	FTH1
26.2954	26.8776	24.7549	26.3892	26.3026	26.6227			0.2921	1	-0.462226	-0.721744	0	E9PQ68;O95169;K9J7I2;E9PIZ8	E9PQ68;O95169;K9J7I2	NADH dehydrogenase [ubiquinone] 1 beta subcomplex subunit 8, mitochondrial	NDUFB8
27.4897	28.5444	26.5533	27.8111	27.9585	27.6861			0.190964	1	-0.289437	-0.498616	0	E9PS17;Q96KG9;E9PK59;E9PPN3;H0YCI6;A0A0A0MQX4;H0YDH0	E9PS17;Q96KG9;E9PK59;E9PPN3	N-terminal kinase-like protein	SCYL1
26.5323	26.5839	25.9107	26.1631	25.999	26.2442			0.381351	1	0.206886	0.907279	0	Q6RFH5;E9PS41;H0YFP2	Q6RFH5;E9PS41	WD repeat-containing protein 74	WDR74
26.2007	26.5928	25.8674	26.3484	26.8011	27.1683			0.807155	0.468089	-0.552298	-1.74514	0	E9PSI1;E9PL78;E9PJM1;E9PMQ9;O15321;E9PJC4;E9PQY7;E9PS99;E9PNW2;G3V1B9	E9PSI1;E9PL78;E9PJM1;E9PMQ9;O15321;E9PJC4;E9PQY7;E9PS99	Transmembrane 9 superfamily member 1	TM9SF1
26.8676	27.2393	25.9236	26.7396	26.55	26.6858			0.015382	1	0.0183652	0.0464189	0	F1T0E5;Q9ULU8;H7C4T6;H7C538;H7C4P2;H0YFP0;A0A0C4DGY2;H7BYR4;H7C4K9;H0Y8B5	F1T0E5;Q9ULU8	Calcium-dependent secretion activator 1	CADPS
28.2678	28.7928	27.502	28.2871	28.2519	28.2189			0.0601278	1	-0.0651061	-0.173469	0	F1T0I1;O15027;A0A3F2YNX0;A0A3F2YNZ0;X6RGP5;A0A0C4DH09;Q8N9G1	F1T0I1;O15027;A0A3F2YNX0;A0A3F2YNZ0	Protein transport protein Sec16A	SEC16A
27.9016	28.9104	24.8662	27.6126	27.7358	28.0833			0.181928	1	-0.58451	-0.477746	0	Q99829;F2Z2V0;B0QZ18;A6PVH9;E7ENH5;Q5JX45;Q5JX60;Q5JX52;Q5JX44;Q5JX61;Q5JX59;Q5JX58;Q5JX56;Q5JX54;Q5JX55;E7EV27;Q5JX57;H0Y524;Q5JX53	Q99829;F2Z2V0;B0QZ18;A6PVH9;E7ENH5;Q5JX45;Q5JX60;Q5JX52;Q5JX44;Q5JX61;Q5JX59;Q5JX58;Q5JX56	Copine-1	CPNE1
27.76	28.6287	27.2496	28.048	27.8872	26.7871			0.209366	1	0.305349	0.540575	0	F2Z3J9;Q14914;Q5JVP2;F6XGT7	F2Z3J9;Q14914	Prostaglandin reductase 1	PTGR1
25.6788	26.4988	25.2057	25.589	25.8167	26.439			0.123502	1	-0.153782	-0.337819	0	F5GWT4;Q9H4A3;F6UYG0;K7ENT7;A6PVV2;A0A6Q8PFM0;F8W9F9;H0Y7T5;Q96J92;Q9Y3S1	F5GWT4;Q9H4A3	Serine/threonine-protein kinase WNK1	WNK1
26.8515	27.611	24.5152	26.7544	27.5922	26.822			0.306976	1	-0.730286	-0.753261	0	F8WAC9;F5GXE4;O95260	F8WAC9;F5GXE4;O95260	Arginyl-tRNA--protein transferase 1	ATE1
27.1957	26.8104	25.8656	27.1742	27.3369	27.927			0.872072	0.404149	-0.855426	-1.87371	0	H0YGR4;F5GYG5;Q9Y3B8;H0YG54;F5H7P1;Q9BTR4;F5H6P8;H0YG37;F5H784	H0YGR4;F5GYG5;Q9Y3B8;H0YG54	Oligoribonuclease, mitochondrial	REXO2
26.2752	26.6646	26.219	25.723	26.1054	26.5651			0.381832	1	0.255122	0.908259	0	F5H1S9;G8JLB3;Q9Y606;F5GY32;F5GXL3;F5H168;F8W9U5;F5H1B2	F5H1S9;G8JLB3;Q9Y606	tRNA pseudouridine synthase;tRNA pseudouridine synthase A, mitochondrial	PUS1
27.7499	27.9717	28.0047	28.3563	28.6587	28.5907	+	3ha_huvec	2.17131	0.0452308	-0.626442	-5.15086	0	F5H1Z6;F5H8H3;Q9Y365;F5GY11;F5H8G1;F5GWK5;F5H0V7;H0YH17;H0YFF3;H0YGA9;F5H5A8;H0YGN8;F5H3G8;F5GY07	F5H1Z6;F5H8H3;Q9Y365;F5GY11;F5H8G1;F5GWK5;F5H0V7;H0YH17;H0YFF3;H0YGA9	PCTP-like protein	STARD10
30.7215	30.9843	29.4892	30.9062	30.7742	30.7999			0.390544	1	-0.428389	-0.925972	0	V9GYY3;F5H2F4;P11586;V9GZ78	V9GYY3;F5H2F4;P11586;V9GZ78	C-1-tetrahydrofolate synthase, cytoplasmic;Methylenetetrahydrofolate dehydrogenase;Methenyltetrahydrofolate cyclohydrolase;Formyltetrahydrofolate synthetase;C-1-tetrahydrofolate synthase, cytoplasmic, N-terminally processed	MTHFD1
29.0783	29.467	28.4964	29.3089	29.2641	29.4019			0.473262	0.979686	-0.311082	-1.09171	0	F5H365;Q15436;G3V4V1;G3V1W4;G3V3G5;G3V2R6;G3V5X8;G3V4Q2;G3V5K1	F5H365;Q15436	Protein transport protein Sec23A	SEC23A
27.918	28.6777	26.7442	27.7283	27.5037	27.1446			0.212016	1	0.321121	0.54656	0	F5H442;Q99816;J3QRU6;J3QKS4	F5H442;Q99816	Tumor susceptibility gene 101 protein	TSG101
30.882	31.5674	27.9932	30.8612	30.8315	30.8521			0.254072	1	-0.700752	-0.639827	0	F8VY35;F5H4R6;P55209;F8W0J6;F8VUX1;H0YIV4;F8W020;F8VXI6;F8VVB5;H0YH88;H0YHC3;B7Z4K9	F8VY35;F5H4R6;P55209;F8W0J6;F8VUX1;H0YIV4;F8W020;F8VXI6;F8VVB5;H0YH88;H0YHC3	Nucleosome assembly protein 1-like 1	NAP1L1
27.5386	28.4585	26.7347	27.7085	27.5131	27.5167			0.00141889	1	-0.00218391	-0.00434905	0	F5H5I6;Q12849;H0Y8R1;H0YAK1	F5H5I6;Q12849;H0Y8R1;H0YAK1	G-rich sequence factor 1	GRSF1
27.7414	28.417	24.4056	27.0114	28.0169	26.9114			0.130728	1	-0.458511	-0.355645	0	F5H5P2;P12694;F5GXU9;H0YH31	F5H5P2;P12694	2-oxoisovalerate dehydrogenase subunit alpha, mitochondrial	BCKDHA
28.9614	29.6186	27.9653	28.906	28.9974	28.7546			0.0259252	1	-0.0375805	-0.0773604	0	F5H6E2;O00159;I3L501;I3L3Y6;I3L3F5	F5H6E2;O00159	Unconventional myosin-Ic	MYO1C
26.173	26.7487	24.6744	26.5535	26.3988	27.0568			0.54789	0.896616	-0.80432	-1.23861	0	F5H7S7;Q13576;E7EWC2;D6R939;E9PDT6;D6RDK8;D6R999;D6RGC6	F5H7S7;Q13576;E7EWC2	Ras GTPase-activating-like protein IQGAP2	IQGAP2
25.1291	28.6834	26.9143	27.7248	27.7643	28.0074			0.37604	1	-0.9232	-0.896449	0	F5H8H2;Q03426;F5GXC0;F5H092;A0A1B0GWC2;F5H163;A0A0B4J236;F5H368;A0A1W2PS16;A0A1B0GWF3	F5H8H2;Q03426;F5GXC0;F5H092;A0A1B0GWC2	Mevalonate kinase	MVK
27.9418	28.28	27.6878	27.6169	28.4956	28.2703			0.192305	1	-0.157742	-0.501698	0	F6T1Q0;Q6L8Q7	F6T1Q0;Q6L8Q7	2,5-phosphodiesterase 12	PDE12
30.242	30.8553	28.5515	30.4076	30.1296	30.0732			0.174404	1	-0.320578	-0.460224	0	F6TLX2;Q9HC38;I3L3Q4;I3L1I0;I3L1F4	F6TLX2;Q9HC38;I3L3Q4	Glyoxalase domain-containing protein 4	GLOD4
27.5477	27.5262	26.438	27.5839	27.7171	27.7363			0.618375	0.761381	-0.508481	-1.37619	0	F6VRR5;Q9BY77;F8WCX5;Q8WUT1;Q6R954;F8WEE2	F6VRR5;Q9BY77;F8WCX5	Polymerase delta-interacting protein 3	POLDIP3
29.6517	30.145	28.8076	29.7568	29.6742	29.7623			0.192212	1	-0.196348	-0.501484	0	F8VPD4;P27708;H7BZB3;H7C2E4;H7C3Z5;P31327	F8VPD4;P27708	CAD protein;Glutamine-dependent carbamoyl-phosphate synthase;Aspartate carbamoyltransferase;Dihydroorotase	CAD
27.1454	26.6009	25.6676	27.809	28.0536	28.0764			1.57576	0.128419	-1.50838	-3.42897	0	F8VUB4;F8VV52;Q9NZN8;H0YHT8;H0YI80;F8VQD8;F8VQF4;A0A087X050;F8VVY1;H0YI11;H0YH84;F8VX63;F8VRS8;F8W145	F8VUB4;F8VV52;Q9NZN8	CCR4-NOT transcription complex subunit 2	CNOT2
28.8327	29.4559	25.0271	28.6013	28.8379	29.2498			0.331596	1	-1.12442	-0.804857	0	F8W651;F8VVA7;P61923;F8VYK5;F8VXB1;F8VUC5;F8W156;F8VXR1;F8VYZ4	F8W651;F8VVA7;P61923;F8VYK5;F8VXB1;F8VUC5;F8W156;F8VXR1;F8VYZ4	Coatomer subunit zeta-1	COPZ1
28.9708	29.804	25.3131	28.5919	30.3419	30.1803			0.490577	0.959749	-1.67539	-1.12596	0	F8VYE8;P36873;F8VR82;F8W0W8;A0A087WYY5	F8VYE8;P36873;F8VR82;F8W0W8;A0A087WYY5	Serine/threonine-protein phosphatase;Serine/threonine-protein phosphatase PP1-gamma catalytic subunit	PPP1CC
27.352	28.3065	27.1005	27.4362	27.5216	27.4594			0.112152	1	0.113955	0.309476	0	F8VYN9;P40616;B4DZG7;F8VP99;F8VP63	F8VYN9;P40616;B4DZG7	ADP-ribosylation factor-like protein 1	ARL1
27.0631	27.8507	26.1771	27.0939	26.8066	26.7898			0.0968782	1	0.133527	0.270641	0	F8VYY9;P54619;F8VVA3;H0YIC9;H0YHF8;F8VPF5;F8VSH3;F8VRY2;F8VSL2;F8VZX1	F8VYY9;P54619	5-AMP-activated protein kinase subunit gamma-1	PRKAG1
27.6268	27.246	26.6706	27.922	28.2508	27.2225			0.68235	0.650346	-0.617301	-1.50081	0	F8W038;Q8IXM2;H0YIS7;F8W1H0	F8W038;Q8IXM2;H0YIS7;F8W1H0	Chromatin complexes subunit BAP18	C17orf49;BAP18;RNASEK-C17orf49
29.6907	30.0588	29.4092	29.8068	29.9732	30.0341			0.473669	0.980445	-0.218463	-1.09252	0	F8W1A4;P54819;F8VZG5;A0A5F9ZHP2;F8VY04;A0A5K1VW67;G3V213;F8VPP1	F8W1A4;P54819;F8VZG5;A0A5F9ZHP2;F8VY04;A0A5K1VW67;G3V213	Adenylate kinase 2, mitochondrial;Adenylate kinase 2, mitochondrial;Adenylate kinase 2, mitochondrial, N-terminally processed	AK2
31.5312	31.0303	31.88	31.8201	31.9333	32.1835			0.861823	0.414377	-0.49844	-1.85332	0	F8W1R7;G3V1V0;P60660;G3V1Y7;J3KND3;B7Z6Z4;F8VPF3;H0YI43;F8W1I5	F8W1R7;G3V1V0;P60660;G3V1Y7;J3KND3;B7Z6Z4;F8VPF3	Myosin light polypeptide 6	MYL6
26.7016	27.585	24.81	26.9848	27.1124	26.5492			0.24406	1	-0.516605	-0.6179	0	F8W6M3;Q9NYG2;H0Y6A5	F8W6M3;Q9NYG2;H0Y6A5	Palmitoyltransferase;Palmitoyltransferase ZDHHC3	ZDHHC3
27.9819	27.7152	26.7086	27.8294	28.0234	28.2353			0.622734	0.762719	-0.560841	-1.38468	0	Q96A26;F8W7Q4;E9PH05	Q96A26;F8W7Q4;E9PH05	Protein FAM162A	FAM162A
27.134	26.8833	25.7491	27.1763	26.5016	26.8972			0.224685	1	-0.269588	-0.574986	0	F8W7U8;P49959;F5GXT0;F5H742;F5H256	F8W7U8;P49959;F5GXT0	Double-strand break repair protein MRE11A	MRE11A
25.5874	26.5126	25.9803	26.1782	26.268	26.0204			0.175938	1	-0.128787	-0.463806	0	F8W8I6;P31483;E5RGV5;F8WE16	F8W8I6;P31483	Nucleolysin TIA-1 isoform p40	TIA1
27.6244	27.7337	25.3992	28.1624	27.8524	28.5518			0.739964	0.539807	-1.26975	-1.61326	0	F8W930;Q9Y6M1;Q9NZI8	F8W930;Q9Y6M1	Insulin-like growth factor 2 mRNA-binding protein 2	IGF2BP2
26.6671	27.2953	26.2215	26.8604	26.875	26.5261			0.0261673	1	-0.0258904	-0.0780632	0	Q96BJ8;F8W9E7;I3L4D1	Q96BJ8;F8W9E7	Engulfment and cell motility protein 3	ELMO3
29.9887	30.4701	29.9655	30.3143	30.2177	30.0313			0.0893491	1	-0.0462799	-0.251182	0	F8WCF6;P59998;F8WDD7;H7C0A3;A0A0A6YYG9;R4GN08;F8WE39;F8WDW3	F8WCF6;P59998;F8WDD7;H7C0A3;A0A0A6YYG9	Actin-related protein 2/3 complex subunit 4	ARPC4-TTLL3;ARPC4
29.3937	29.261	28.5475	29.1831	29.3302	29.3299			0.328997	1	-0.213698	-0.799441	0	F8WJN3;Q16630;F8W084;A0A3B3ISW1	F8WJN3;Q16630	Cleavage and polyadenylation specificity factor subunit 6	CPSF6
27.4688	27.8616	27.3936	27.5625	27.5064	27.3048			0.285848	1	0.116781	0.708414	0	G3V0I5;P49821;B4DE93;E9PQP1;H0YE81;E9PLC6;E9PPR0;E9PMX3;E9PJL9;H0YD04;E9PPD6;E9PPS5	G3V0I5;P49821;B4DE93	NADH dehydrogenase [ubiquinone] flavoprotein 1, mitochondrial	NDUFV1
27.2415	27.7144	24.6816	27.3215	27.1751	27.244			0.302307	1	-0.70104	-0.743399	0	G3V158;Q9Y315;E9PPM8;E9PMH9;E9PML7;E9PPK3	G3V158;Q9Y315;E9PPM8;E9PMH9;E9PML7	Deoxyribose-phosphate aldolase	DERA
29.2957	29.8979	27.2139	29.6126	29.8327	29.7346			0.494195	0.963686	-0.924145	-1.1331	0	G3V1D3;G3V180;Q9NY33;E9PQ14;E9PNX5;E9PPK9;E9PKK8	G3V1D3;G3V180;Q9NY33	Dipeptidyl peptidase 3	DPP3
27.2451	27.9318	24.9238	27.224	27.0109	26.8118			0.125829	1	-0.315342	-0.343577	0	Q12769;G3V198;E9PR16	Q12769;G3V198;E9PR16	Nuclear pore complex protein Nup160	NUP160
26.8081	27.2353	26.3259	27.1083	26.9833	26.8889			0.307195	1	-0.20371	-0.753723	0	P57764;G3V1A6;E9PIB2	P57764;G3V1A6;E9PIB2	Gasdermin-D	GSDMD
28.8371	28.8849	26.9252	29.1203	29.1655	29.2112			0.666876	0.682846	-0.949945	-1.47066	0	G3V1C3;Q9BZZ5;H0YER7;E9PQK6	G3V1C3;Q9BZZ5;H0YER7	Apoptosis inhibitor 5	API5
26.4964	26.5452	25.7682	26.453	26.7558	26.0946			0.200854	1	-0.164546	-0.521253	0	G3V1R5;O43847;F5H7V1;H0Y5G9	G3V1R5;O43847;F5H7V1	Nardilysin	NRD1
32.2113	31.8763	31.5566	31.5235	31.9628	32.0304			0.0596283	1	0.0424995	0.172108	0	G3V203;J3QQ67;Q07020;H0YHA7;F8VUA6;F8VYV2;A0A075B7A0;F8VXR6	G3V203;J3QQ67;Q07020;H0YHA7;F8VUA6;F8VYV2;A0A075B7A0	60S ribosomal protein L18	RPL18
31.4681	31.91	30.8997	31.6755	32.1674	31.7057			0.565168	0.862396	-0.423597	-1.2724	0	G3V576;G3V2Q1;P07910;G3V555;G3V575	G3V576;G3V2Q1;P07910;G3V555;G3V575	Heterogeneous nuclear ribonucleoproteins C1/C2	HNRNPC
26.8409	27.2069	24.407	26.8046	26.8816	26.9815			0.347634	1	-0.737672	-0.83812	0	G3V3A4;Q13573;G3V4X8;G3V5R3	G3V3A4;Q13573;G3V4X8	SNW domain-containing protein 1	SNW1
28.6973	29.087	24.437	28.9706	28.8658	28.9081			0.433319	1	-1.50776	-1.01217	0	G3V4P8;P60983;M0QYG8;M0R1D2;M0R0C1;M0QYJ8;O60234	G3V4P8;P60983	Glia maturation factor beta	GMFB
30.564	31.0254	30.8008	30.8236	30.9259	30.9989			0.347169	1	-0.119375	-0.837159	0	G3V5Z7;P60900;G3V295;G3V3I1;G3V3U4;H0YJC4;G3V4S5;G3V2S7	G3V5Z7;P60900;G3V295;G3V3I1;G3V3U4	Proteasome subunit alpha type;Proteasome subunit alpha type-6	PSMA6
27.8496	28.2031	27.3495	27.2267	27.4847	28.0085			0.269298	1	0.227399	0.672874	0	G3XAH6;P51003;A0A0C4DGK1;G3V3I9;H0YJ00;G3V457;Q9NRJ5;Q9BWT3;H7C3W0;H0YJL4;F8WAT4	G3XAH6;P51003;A0A0C4DGK1	Poly(A) polymerase alpha	PAPOLA
27.8439	27.8561	27.1471	28.27	28.1069	28.2928			1.18265	0.246019	-0.607583	-2.51556	0	G5EA30;Q92879;E9PKU1;E9PQK4;E9PSH0;F5H0D8;F5H4Y5;E9PKA1;A0A0J9YX66;A0A1B0GUN8;E9PC62;A0A1B0GU44;F5H3J7;Q5VZZ6;V9GYD9;O95319;A0A0J9YXJ0	G5EA30;Q92879;E9PKU1	CUGBP Elav-like family member 1	CELF1
31.8341	32.3087	31.2505	32.0439	32.1867	31.994			0.372811	1	-0.277125	-0.889854	0	P31943;G8JLB6;E9PCY7;D6RBM0;D6RIU0;D6RFM3;D6RIT2;D6RJ04;H0YB39;D6RIH9;D6RDU3;D6RAM1;D6R9T0;E5RGV0;E7EN40;H0YBD7;H0YBG7;E5RGH4;H0YAQ2	P31943;G8JLB6;E9PCY7;D6RBM0;D6RIU0;D6RFM3;D6RIT2	Heterogeneous nuclear ribonucleoprotein H;Heterogeneous nuclear ribonucleoprotein H, N-terminally processed	HNRNPH1
31.0075	30.9507	30.0877	30.5721	30.5126	30.6635			0.120329	1	0.0992546	0.329937	0	H0UI06;P14406;D6R9C3;D6RIE3;D6RGV5	H0UI06;P14406;D6R9C3;D6RIE3;D6RGV5	Cytochrome c oxidase subunit 7A2, mitochondrial	COX7A2
26.7892	27.8171	26.8585	26.817	27.0932	26.9654			0.225007	1	0.19641	0.575705	0	H0UI80;X6RLT1;Q8IXH7	H0UI80;X6RLT1;Q8IXH7	Negative elongation factor C/D	TH1L;NELFCD
26.8017	26.4121	24.9029	27.1951	27.9558	26.8816			0.922462	0.373371	-1.30526	-1.97454	0	H0YD13;H0Y2P0;P16070;H0YE40;H0YDX6;H0YD17;H0YDW7;H0YCV9;H0Y5E4;E9PKC6;J3KN83	H0YD13;H0Y2P0;P16070;H0YE40;H0YDX6;H0YD17;H0YDW7;H0YCV9;H0Y5E4	CD44 antigen	CD44
28.5659	29.5704	28.6465	29.1393	28.6664	28.1313			0.258353	1	0.281937	0.649154	0	H0Y8X4;O43598	H0Y8X4;O43598	2-deoxynucleoside 5-phosphate N-hydrolase 1	DNPH1
29.1214	29.807	28.543	29.5549	29.3147	29.5591			0.354767	1	-0.319087	-0.852835	0	H0Y938;H0YAC7;P35606;A0A7I2V258;A0A7I2V3G0;A0A7I2YQF9;D6R997;D6RBZ7;D6RCL6;D6RBG7;D6RBT6	H0Y938;H0YAC7;P35606;A0A7I2V258	Coatomer subunit beta	COPB2
29.1034	28.7828	28.0421	29.3998	29.3069	29.3028			1.03142	0.314971	-0.693759	-2.19645	0	H0Y993;P35659;A0A494C028;B4DFG0;H0Y8X0;A0A494C198;D6RDA2;D6R9L5	H0Y993;P35659;A0A494C028;B4DFG0;H0Y8X0;A0A494C198;D6RDA2	Protein DEK	DEK
30.6129	30.7729	30.5416	30.6347	30.7639	30.8651			0.514823	0.941467	-0.112113	-1.17374	0	P11940;H0YAR2;E7ERJ7;E7EQV3;A0A7I2V649;A0A087WTT1;A0A7I2YQ88;A0A7I2V4N4;A0A7I2YQE4;A0A7I2YQ90;Q9H361;H0YBN4;H0YAP2;H0YAS6;H0YB75;H0YB86;Q4VXU2;A0A6Q8JFT6;H0YAS7;E5RJB9;E5RGH3;E5RH24;H0YC10;A0A6I8PLA1;A0A6I8PS38;E5RHG7;A0A6Q8JFV4;E5RGC4;E5RFD8;Q96DU9;A0A7I2V3J9	P11940;H0YAR2;E7ERJ7;E7EQV3;A0A7I2V649;A0A087WTT1;A0A7I2YQ88;A0A7I2V4N4;A0A7I2YQE4;A0A7I2YQ90;Q9H361	Polyadenylate-binding protein 1;Polyadenylate-binding protein;Polyadenylate-binding protein 3	PABPC1;PABPC3
30.1069	30.3583	27.7824	29.9894	29.5828	29.708			0.155417	1	-0.344232	-0.415392	0	H0YDT6;O00303;A0A7I2YQA0;A0A1W2PP79;A0A7I2V4S2	H0YDT6;O00303	Eukaryotic translation initiation factor 3 subunit F	EIF3F
27.7817	27.074	24.7738	28.1528	28.3546	27.7454			0.766473	0.50632	-1.54109	-1.66517	0	H0YET9	H0YET9		ARRB1
30.7682	31.0004	30.0177	30.7965	30.746	30.9947			0.337791	1	-0.250308	-0.817736	0	H0YFD6;P40939;A0A2R8Y4F5;A0A2R8YG21;A0A2R8Y688	H0YFD6;P40939;A0A2R8Y4F5;A0A2R8YG21	Trifunctional enzyme subunit alpha, mitochondrial;Long-chain enoyl-CoA hydratase;Long chain 3-hydroxyacyl-CoA dehydrogenase	HADHA
26.8881	27.509	24.3894	27.1434	27.2333	26.9601			0.372164	1	-0.850101	-0.888531	0	H0YJH6;P42226;A0A494C0T4;A0A1W2PNW1;G3V5I8;G3V370;G3V5K5;Q5FBW6;G3V2L2;G3V2M3;G3V2H4;G3V568;H0YIY2	H0YJH6;P42226;A0A494C0T4;A0A1W2PNW1	Signal transducer and activator of transcription 6	STAT6
27.959	28.8391	24.1638	27.6204	27.8135	27.7648			0.200017	1	-0.745572	-0.519345	0	H0YNW5;H0YKC5;P33316;H0YMM5;A0A0C4DGL3;H0YNJ9;H0YKI0;H0YMP1	H0YNW5;H0YKC5;P33316;H0YMM5;A0A0C4DGL3;H0YNJ9;H0YKI0	Deoxyuridine 5-triphosphate nucleotidohydrolase, mitochondrial	DUT
31.0367	30.5125	29.841	30.8111	30.8125	31.0684			0.537005	0.910307	-0.433921	-1.21728	0	H0YKD8;P46779;H0YMF4;H0YLP6	H0YKD8;P46779;H0YMF4;H0YLP6	60S ribosomal protein L28	RPL28
30.178	30.6118	30.3073	30.6356	30.7201	30.8561			1.21447	0.228515	-0.371571	-2.58463	0	H0YMZ1;H0YL69;P25789;H0YMA1;H0YN18;H0YLC2;H0YKT8;H0YMI6;H0YKS0;H0YLS6;H0YMV3	H0YMZ1;H0YL69;P25789;H0YMA1;H0YN18;H0YLC2;H0YKT8;H0YMI6	Proteasome subunit alpha type;Proteasome subunit alpha type-4;Proteasome subunit beta type	PSMA4
27.0024	27.7461	25.6624	27.1139	27.4526	26.9874			0.240154	1	-0.380988	-0.6093	0	H0YM23;O75179;H0YLQ3;A0A1W2PQ15	H0YM23;O75179	Ankyrin repeat domain-containing protein 17	ANKRD17
28.9492	28.5953	25.7168	28.3441	28.615	29.0982			0.372952	1	-0.932046	-0.890141	0	H0YMV8;Q71UM5;C9JLI6;C9J1C5	H0YMV8;Q71UM5;C9JLI6	40S ribosomal protein S27;40S ribosomal protein S27-like	RPS27L
31.4031	31.5945	30.9461	31.5311	31.4674	31.4825			0.3908	1	-0.179085	-0.926492	0	H0YN26;P39687;H7BZ09;O95626;O43423	H0YN26;P39687	Acidic leucine-rich nuclear phosphoprotein 32 family member A	ANP32A
26.3569	26.6133	25.5479	26.2684	26.5895	26.5914			0.386089	1	-0.310398	-0.91692	0	H0YNP1;O94923	H0YNP1;O94923	D-glucuronyl C5-epimerase	GLCE
27.5915	28.2929	26.515	27.5724	27.9213	27.2518			0.073333	1	-0.115387	-0.20904	0	H3BLV9;Q96SB4;D6RBM8;D6RBF8	H3BLV9;Q96SB4	SRSF protein kinase 1	SRPK1
26.9998	27.4308	24.8627	26.791	26.8691	26.6759			0.164379	1	-0.347574	-0.436666	0	H3BM14;H3BM74;Q9Y5A7;C9JRT6;F8WDB6;F8WDL9;H7C5N1;H7C5E1	H3BM14;H3BM74;Q9Y5A7;C9JRT6;F8WDB6	NEDD8 ultimate buster 1	NUB1
27.4505	27.3782	25.2615	27.195	27.7657	27.2482			0.404144	1	-0.706217	-0.953511	0	H3BM67;H3BUP2;H3BUN4;O60936;H3BQJ5;J3QLT7	H3BM67;H3BUP2;H3BUN4;O60936	Nucleolar protein 3	NOL3
28.8505	29.1053	28.1758	28.8228	28.7888	29.0683			0.248757	1	-0.182761	-0.628206	0	H3BV80;H3BMM9;H3BTC0;Q15287;H3BPG5;H3BMS0;H3BRK4;H3BTV0;H3BNI3;H3BP82;H3BTR6;H3BUG0;H3BTY0;H3BNU7;H3BUL0	H3BV80;H3BMM9;H3BTC0;Q15287;H3BPG5;H3BMS0	RNA-binding protein with serine-rich domain 1	RNPS1
30.003	30.5733	25.2486	29.972	30.6242	30.1486			0.409931	1	-1.63996	-0.965191	0	H3BNC9;P08708;H0YN88;A0A075B716;H0YN73;A0A0J9YYC4	H3BNC9;P08708;H0YN88;A0A075B716	40S ribosomal protein S17	RPS17
28.4333	28.6681	26.6701	27.9642	28.2532	28.127			0.108507	1	-0.190995	-0.300283	0	H3BND4;Q6P996;Q86XE2;Q6P474;Q6XYB5;J3KNK7;H3BNL6	H3BND4;Q6P996	Pyridoxal-dependent decarboxylase domain-containing protein 1	PDXDC1
26.3455	27.5553	25.3902	27.1169	26.7562	26.8694			0.310848	1	-0.483847	-0.761421	0	H3BRN4;H3BNQ7;P80404;H3BMJ9;H3BPW8	H3BRN4;H3BNQ7;P80404	4-aminobutyrate aminotransferase, mitochondrial	ABAT
27.6404	28.4593	25.3792	27.7957	27.4037	27.3556			0.142793	1	-0.358695	-0.385059	0	H3BP20;P06865;H3BS10;A0A804HKX5;A0A804HLJ5;A0A804HIQ5;A0A804HIC8;A0A804HIU3;H3BU85;H3BTD4;A0A804HJ97;A0A087WUJ7	H3BP20;P06865;H3BS10;A0A804HKX5;A0A804HLJ5;A0A804HIQ5;A0A804HIC8	Beta-hexosaminidase;Beta-hexosaminidase subunit alpha	HEXA
30.3871	29.789	29.9548	30.4729	30.8054	30.711			1.41481	0.149151	-0.619462	-3.03803	0	H3BPE7;P35637	H3BPE7;P35637	RNA-binding protein FUS	FUS
26.7275	25.2589	25.469	27.07	26.9912	26.2785			0.854063	0.41494	-0.961414	-1.8379	0	H3BPK3;Q16775;H3BPQ4;H3BQW8;H3BV79	H3BPK3;Q16775;H3BPQ4	Hydroxyacylglutathione hydrolase, mitochondrial	HAGH
30.5916	26.0871	25.2121	30.6941	30.9091	30.7374			0.978755	0.331278	-3.48325	-2.08846	0	O14562;H3BRL3;H3BUM8	O14562;H3BRL3;H3BUM8	Ubiquitin domain-containing protein UBFD1	UBFD1
30.4056	30.6146	28.9141	31.4478	31.7181	31.5371			1.37137	0.161457	-1.58958	-2.93682	0	H3BUX2;O43169;D6RFH4;J3QR91	H3BUX2;O43169;D6RFH4	Cytochrome b5 type B	CYB5B
28.5949	28.0406	28.7055	28.5448	28.8236	28.7844			0.533918	0.916864	-0.270571	-1.21123	0	H3BV55;O15305;H3BPH4;A0A804HKA7;H3BRM0;H3BR08;H3BM92;H3BV34;H3BT06;H3BNY9;Q92871	H3BV55;O15305;H3BPH4;A0A804HKA7	Phosphomannomutase;Phosphomannomutase 2	PMM2
25.4659	27.3886	24.9831	25.9039	26.2502	26.4539			0.124972	1	-0.256794	-0.341457	0	H7BXI1;A0A499FIX8;A0A087WXU3;A0FGR8	H7BXI1;A0A499FIX8;A0A087WXU3;A0FGR8	Extended synaptotagmin-2	ESYT2
28.7841	28.5658	27.0941	28.5406	28.4153	28.3106			0.19708	1	-0.274189	-0.51264	0	H7BYD0;Q16718;F8WAS3;C9IZN5;A0A7I2V2W4;A0A087X1G1;A0A7I2V3L8;A0A024R772;A0A087WXR5	H7BYD0;Q16718;F8WAS3;C9IZN5;A0A7I2V2W4;A0A087X1G1;A0A7I2V3L8	NADH dehydrogenase [ubiquinone] 1 alpha subcomplex subunit 5	NDUFA5
27.558	27.7383	26.7986	27.7162	25.8538	25.4924			0.606823	0.77852	1.01081	1.35368	0	Q5JRG1;H7BYF2;Q9BVL2	Q5JRG1;H7BYF2;Q9BVL2	Nucleoporin p58/p45	NUPL1
28.5806	29.2967	27.925	28.6445	28.9508	28.5055			0.0844605	1	-0.0995121	-0.238429	0	H7C2Q8;Q99848	H7C2Q8;Q99848	Probable rRNA-processing protein EBP2	EBNA1BP2
25.7093	25.0351	24.9407	28.4735	28.0769	28.1233	+	3ha_huvec	3.41056	0.0206667	-2.99619	-10.9973	0	H7C3X5;Q13190	H7C3X5;Q13190	Syntaxin-5	STX5
27.8604	28.1929	25.0519	27.757	28.0259	27.4329			0.280041	1	-0.703545	-0.695987	0	Q9NUU7;I3L0H8;F6QDS0;Q9UMR2;H3BQK0;I3L352;H3BN59;H3BMQ5;H3BTB3;H3BP36;E9PR46;J3QL17;A0A1B0GV69;H3BP50;H0YD26;H3BSL8;J3QRH0;Q9UHL0	Q9NUU7;I3L0H8;F6QDS0;Q9UMR2;H3BQK0;I3L352	ATP-dependent RNA helicase DDX19A;ATP-dependent RNA helicase DDX19B	DDX19A;DDX19B
28.343	28.882	27.198	28.3586	28.4109	28.3962			0.190891	1	-0.247605	-0.498448	0	I3L0N3;P46459;I3L2G1;K7EQD6;I3L0L3;I3L338;I3L4Q9	I3L0N3;P46459	Vesicle-fusing ATPase	NSF
29.8672	30.3224	27.8718	30.0497	29.7909	29.588			0.23426	1	-0.45575	-0.596276	0	I3L1P8;Q02978	I3L1P8;Q02978	Mitochondrial 2-oxoglutarate/malate carrier protein	SLC25A11
25.8739	25.3924	25.5481	25.6279	25.4341	25.5699			0.147932	1	0.0608285	0.397461	0	I3L2C7;P57678;I3L4A4;I3L399;I3L4M4;E7EN12	I3L2C7;P57678	Gem-associated protein 4	GEMIN4
26.4412	26.2232	25.9722	26.038	26.797	27.0512			0.553926	0.892632	-0.416553	-1.25042	0	I3L4Y1;A0A0G2JQ41;A0A1C7CYZ0;Q12979;B7Z683;I3L2P5;I3L1U8;I3NI05;A0A0G2JRJ1;A0A0G2JQT5;A0A0G2JQB5	I3L4Y1;A0A0G2JQ41;A0A1C7CYZ0;Q12979;B7Z683	Active breakpoint cluster region-related protein	ABR
26.8418	27.6647	26.574	27.6319	27.6351	27.4982			0.781921	0.493751	-0.5616	-1.69549	0	Q92785;J3KMZ8;E9PN04	Q92785;J3KMZ8	Zinc finger protein ubi-d4	DPF2
27.9411	28.587	23.5404	27.673	28.4381	28.0491			0.354347	1	-1.36389	-0.85197	0	J3KN29;O00233;F5H5V4;F5GX23;F5H169;F5H7X1	J3KN29;O00233;F5H5V4;F5GX23;F5H169	26S proteasome non-ATPase regulatory subunit 9	PSMD9
31.0665	31.2935	30.561	31.0982	31.4418	31.3653			0.613044	0.769798	-0.328113	-1.36581	0	J3QL05;J3KP15;Q01130	J3QL05;J3KP15;Q01130	Serine/arginine-rich splicing factor 2	SRSF2
28.556	28.8412	27.5625	28.5085	28.9494	28.6799			0.408294	1	-0.392677	-0.961889	0	J3KPP4;O95232;D6RDI2;C9JL41;D6RHH0;H7C5U7;U3KQT3;E7EN55	J3KPP4;O95232;D6RDI2	Luc7-like protein 3	LUC7L3
29.3293	29.5828	29.1327	29.7932	29.5763	29.826			1.18621	0.244647	-0.383556	-2.52325	0	J3KQ32;Q9NTK5;C9JTK6;C9JCJ9	J3KQ32;Q9NTK5	Obg-like ATPase 1	OLA1
26.6048	26.1856	27.0321	27.8095	28.0118	27.2823			1.54155	0.135709	-1.09372	-3.34367	0	J3KQ34;Q9H9Q2;J3QT73;A0A087X1P5;J3KQ41	J3KQ34;Q9H9Q2;J3QT73;A0A087X1P5;J3KQ41	COP9 signalosome complex subunit 7b	COPS7B
26.0119	26.5896	24.7515	26.156	26.1225	26.1278			0.257269	1	-0.351065	-0.646795	0	J3KQ48;Q9Y3E5	J3KQ48;Q9Y3E5	Peptidyl-tRNA hydrolase 2, mitochondrial	PTRH2
27.359	28.0649	27.1481	27.1116	27.275	27.2198			0.499777	0.959666	0.321868	1.14411	0	J3KQJ1;Q8NBJ7;C9JL30;A8MXB9;A0A494C1B1;C9J660;E9PBT8;H7C3B2;F8WA42;J3QT17;F8WEX5;E9PG02;F8WEV7;F8WES7	J3KQJ1;Q8NBJ7;C9JL30;A8MXB9;A0A494C1B1;C9J660;E9PBT8;H7C3B2;F8WA42;J3QT17	Sulfatase-modifying factor 2	SUMF2
29.5609	30.5714	29.2034	29.7523	29.8564	30.0064			0.0789079	1	-0.0931587	-0.223828	0	J3KR44;Q96FW1;F5GYN4;F5H6Q1;F5GYJ8;F5H3F0	J3KR44;Q96FW1;F5GYN4;F5H6Q1;F5GYJ8;F5H3F0	Ubiquitin thioesterase OTUB1	OTUB1
29.8988	30.3409	29.382	29.5689	29.8085	29.7984			0.198686	1	0.148643	0.516308	0	J3KTA4;P17844;A0A7I2V507;A0A7I2V2S0;A0A0G2JLI4;A0A7I2V5F5;J3QSF1;J3KRZ1;J3QRQ7;J3QR02;X6RLV5;J3QRN5	J3KTA4;P17844;A0A7I2V507;A0A7I2V2S0;A0A0G2JLI4;A0A7I2V5F5	Probable ATP-dependent RNA helicase DDX5	DDX5
31.0791	31.292	30.3589	30.9791	31.1356	30.8982			0.11809	1	-0.0943197	-0.324356	0	J3KTL2;Q07955;J3KSR8;J3QQV5;J3KSW7	J3KTL2;Q07955	Serine/arginine-rich splicing factor 1	SRSF1
29.6771	29.1657	29.1728	29.4124	29.4301	29.2296			0.0351533	1	-0.018809	-0.103905	0	J3QLE5;P63162;P14678;J3KRY3;S4R3P3	J3QLE5;P63162;P14678;J3KRY3;S4R3P3	Small nuclear ribonucleoprotein-associated protein N;Small nuclear ribonucleoprotein-associated proteins B and B	SNRPN;SNRPB
26.349	27.4987	25.4381	26.6473	25.2692	26.2949			0.188821	1	0.358142	0.493682	0	J3QLR8;Q9Y3D9	J3QLR8;Q9Y3D9	28S ribosomal protein S23, mitochondrial	MRPS23
28.8067	28.4678	28.3344	28.484	28.5604	29.0759			0.29662	1	-0.170443	-0.73135	0	J3QQZ9;Q9NVS9;J3QQV6;A0A286YFL3	J3QQZ9;Q9NVS9;J3QQV6	Pyridoxine-5-phosphate oxidase	PNPO
30.379	30.5779	30.0334	30.3965	30.4465	30.3158			0.125743	1	-0.0561644	-0.343363	0	J3QRS3;P19105;O14950;P24844;J3KTJ1	J3QRS3;P19105;O14950;P24844;J3KTJ1	Myosin regulatory light chain 12A;Myosin regulatory light chain 12B;Myosin regulatory light polypeptide 9	MYL12A;MYL12B;MYL9
29.5454	29.1448	28.8098	29.7876	29.8483	29.4566			1.01702	0.312028	-0.530862	-2.16678	0	J3QRS9;O43670;X6R4W8;J3KS31;J3QS27;J3KTL1;J3KRB6;J3KRW6;H0Y3M2	J3QRS9;O43670;X6R4W8;J3KS31	BUB3-interacting and GLEBS motif-containing protein ZNF207	ZNF207
26.7778	25.9121	25.1291	26.5089	26.6595	26.7832			0.667921	0.681806	-0.710869	-1.47269	0	J3QRU1;P07947;P06241;H0Y3C5;J3KPD6;P08631	J3QRU1;P07947	Non-specific protein-tyrosine kinase;Tyrosine-protein kinase Yes	YES1
27.0661	27.3176	26.2671	27.4499	26.9815	26.7086			0.159484	1	-0.163049	-0.425073	0	J3QRU8;Q9Y2X7;A0A0C4DGN6;J3QLH1;J3QL89;J3QQI0	J3QRU8;Q9Y2X7;A0A0C4DGN6	ARF GTPase-activating protein GIT1	GIT1
27.0589	27.5152	25.9939	27.105	27.2493	27.233			0.305446	1	-0.339793	-0.750033	0	J3QRV5;Q6P1M3;J3QLD8;J3QL58;J3QSA6;J3KRE1;J3QLV4;J3QRZ8;J3QS20	J3QRV5;Q6P1M3	Lethal(2) giant larvae protein homolog 2	LLGL2
28.8809	29.1227	28.4263	28.9567	28.8407	28.7473			0.0623692	1	-0.0382373	-0.179563	0	J3QSV6;O76021;I3L3C4;I3L3U9;I3L234;I3L1A3	J3QSV6;O76021;I3L3C4;I3L3U9	Ribosomal L1 domain-containing protein 1	RSL1D1
29.812	29.7659	29.074	29.9527	29.6757	29.9204			0.516049	0.94122	-0.29897	-1.17615	0	O43684;J3QT28;J3QSX4	O43684;J3QT28;J3QSX4	Mitotic checkpoint protein BUB3	BUB3
29.5452	29.9629	28.1501	29.3427	29.2898	29.5071			0.104731	1	-0.160463	-0.290711	0	K7EJE8;K7EKE6;P36776;K7ER27;K7ERR6;K7ER56;K7EQF8	K7EJE8;K7EKE6;P36776	Lon protease homolog, mitochondrial	LONP1
29.835	29.304	28.768	30.3555	30.3277	30.0678			1.37704	0.162204	-0.948022	-2.94993	0	K7EQ55;K7EK33;Q96EP5;K7EQ02	K7EQ55;K7EK33;Q96EP5;K7EQ02	DAZ-associated protein 1	DAZAP1
29.2608	29.5481	27.7683	29.2921	29.3419	29.355			0.35462	1	-0.470579	-0.852531	0	O60437;K7EKI8;K7EQ71	O60437;K7EKI8	Periplakin	PPL
26.1023	26.1379	23.9466	26.6169	26.6413	25.9793			0.602163	0.788548	-1.0169	-1.3446	0	P36954;K7EKS1;K7EK49	P36954;K7EKS1	DNA-directed RNA polymerase II subunit RPB9	POLR2I
31.1595	31.7749	30.1374	31.485	31.9558	31.8406			0.670945	0.676642	-0.736519	-1.47858	0	K7EL50;P27797;A0A7P0T861;K7EJB9	K7EL50;P27797;A0A7P0T861;K7EJB9	Calreticulin	CALR
29.8516	29.9031	25.2315	30.5662	29.9156	29.6595			0.473948	0.981519	-1.71835	-1.09307	0	K7ELC2;P62841;K7EM56;A0A0B4J2B4;S4R417;K7EQJ5;K7EJ78;S4R456	K7ELC2;P62841;K7EM56;A0A0B4J2B4;S4R417;K7EQJ5;K7EJ78;S4R456	40S ribosomal protein S15	RPS15
26.5212	26.8687	26.0069	26.4998	27.5085	26.5153			0.377939	1	-0.375559	-0.900324	0	K7ELG9;Q3MHD2	K7ELG9;Q3MHD2	Protein LSM12 homolog	LSM12
31.0041	31.1871	30.0104	30.9184	31.2861	31.4682			0.541825	0.897705	-0.49038	-1.22673	0	K7ELL7;P14314;K7EPW7;A0A7I2V2T6;A0A0C4DGP4;K7EKX1;K7EJ70;K7EIP3	K7ELL7;P14314	Glucosidase 2 subunit beta	PRKCSH
29.3072	29.8103	27.8634	29.5069	29.6213	29.3193			0.342988	1	-0.488879	-0.828511	0	K7EM18;P41567;O60739;K7EQP2	K7EM18;P41567;O60739	Eukaryotic translation initiation factor 1;Eukaryotic translation initiation factor 1b	EIF1;EIF1B
27.3405	27.5551	24.8781	26.689	26.8083	27.3385			0.149632	1	-0.354048	-0.401547	0	K7EMM8;Q49A26;K7EPU6;K7EQB2	K7EMM8;Q49A26	Putative oxidoreductase GLYR1	GLYR1
26.7811	27.9944	25.4937	26.2699	27.3734	26.4147			0.0295565	1	0.0703557	0.0878639	0	K7EMY7;K7ER15;Q9H0R4;K7EQD2;K7EJQ8;A0A1B0GXB1	K7EMY7;K7ER15;Q9H0R4;K7EQD2	Haloacid dehalogenase-like hydrolase domain-containing protein 2	HDHD2
27.419	26.7858	25.2269	27.162	27.3782	27.5495			0.6001	0.793481	-0.886023	-1.34058	0	K7EP07;Q99426;K7EK42;A0A494C0X0;K7EL99;K7EQH0;K7ER04	K7EP07;Q99426;K7EK42;A0A494C0X0	Tubulin-folding cofactor B	TBCB
30.5739	29.6356	30.6342	25.8118	30.7211	30.8297			0.276405	1	1.16035	0.688184	0	K7ERI7;P35268;K7EJT5;K7EP65;K7EKS7;K7ELC4;K7EMH1	K7ERI7;P35268;K7EJT5;K7EP65;K7EKS7;K7ELC4;K7EMH1	60S ribosomal protein L22	RPL22
27.6455	28.4723	25.6267	27.5359	27.7088	27.8447			0.203597	1	-0.448296	-0.527496	0	K7ES61;Q9BYD3;K7EKI4;K7ELF1;K7ELQ0;X6RAY8	K7ES61;Q9BYD3;K7EKI4;K7ELF1;K7ELQ0;X6RAY8	39S ribosomal protein L4, mitochondrial	MRPL4
25.6709	26.4898	26.0893	26.747	27.2883	26.8554			1.42043	0.149927	-0.880248	-3.05127	0	Q6UUV9;M0QX46;M0QXN6	Q6UUV9;M0QX46;M0QXN6	CREB-regulated transcription coactivator 1	CRTC1
27.612	27.6059	25.2663	27.1464	27.8439	27.7292			0.387427	1	-0.745087	-0.919641	0	M0QY43	M0QY43		MYH14
27.1069	26.2711	26.2719	27.1939	27.6179	27.5614			1.37355	0.162336	-0.907754	-2.94186	0	M0QY97;Q9UPT8	M0QY97;Q9UPT8	Zinc finger CCCH domain-containing protein 4	ZC3H4
27.3767	28.2475	26.8445	27.8634	27.9311	27.8871			0.421022	1	-0.404298	-0.987513	0	M0QZR4;Q92888;M0QYC1;M0R2C7;M0QYS3;M0QZH8;M0R3H5	M0QZR4;Q92888	Rho guanine nucleotide exchange factor 1	ARHGEF1
30.2929	30.617	29.5286	30.6401	30.7127	30.6599			0.744815	0.532062	-0.524754	-1.62275	0	M0R0C6;Q92945;A0A087WTP3;M0R0I5;M0QYH3;M0QXW7;M0R3J3;M0R251;M0QYG1;M0R263	M0R0C6;Q92945;A0A087WTP3;M0R0I5	Far upstream element-binding protein 2	KHSRP
30.9835	31.3505	30.0792	31.0682	30.8647	31.2686			0.265519	1	-0.262802	-0.664705	0	M0R0F0;M0R0R2;P46782;M0QZN2	M0R0F0;M0R0R2;P46782;M0QZN2	40S ribosomal protein S5;40S ribosomal protein S5, N-terminally processed	RPS5
30.3669	30.4773	29.2571	30.3821	30.3484	30.5065			0.409436	1	-0.37853	-0.964193	0	M0R117;Q02543;M0R3D6;M0R1A7;M0R0P7	M0R117;Q02543;M0R3D6;M0R1A7;M0R0P7	60S ribosomal protein L18a	RPL18A
26.2355	26.4524	25.9932	26.9693	26.3597	26.428			0.698626	0.616448	-0.358651	-1.53254	0	M0R165;Q9UBC2;M0R2S2;K7EJR2;M0R330;M0QX30;M0R1V5;M0R3I1	M0R165;Q9UBC2;M0R2S2	Epidermal growth factor receptor substrate 15-like 1	EPS15L1
28.8036	29.4294	25.1488	28.7006	29.0737	28.6928			0.313526	1	-1.02844	-0.767054	0	Q16740;M0R208;A0A2R8YEF5	Q16740;M0R208	ATP-dependent Clp protease proteolytic subunit, mitochondrial;ATP-dependent Clp protease proteolytic subunit	CLPP
27.4562	27.6025	25.0005	26.4602	26.9666	26.8484			0.0281996	1	-0.0720062	-0.0839481	0	M0R2B7;P28340;A0A087WYJ2;M0QZR8;A0A2R8Y7K6;M0QXE6;A0A2R8Y705;M0QXQ2;M0R3H8	M0R2B7;P28340;A0A087WYJ2;M0QZR8;A0A2R8Y7K6	DNA polymerase;DNA polymerase delta catalytic subunit	POLD1
28.1478	28.2792	26.0119	28.1277	28.3949	28.2069			0.443748	1	-0.763535	-1.03302	0	O00115;K7ENE5	O00115;K7ENE5	Deoxyribonuclease-2-alpha	DNASE2
28.9069	29.4108	26.7703	29.547	29.463	29.5236			0.640035	0.733226	-1.14854	-1.41838	0	O00116;B7Z3Q4;A0A7P0T984;A0A1B0GWA2;A0A7P0TAL3;A0A2R8YEL0;A0A7P0TAU9;A0A7P0T9C9;A0A7P0T8Q7;A0A7P0TA54;B8ZZ81;A0A7P0T857	O00116;B7Z3Q4;A0A7P0T984;A0A1B0GWA2;A0A7P0TAL3;A0A2R8YEL0;A0A7P0TAU9	Alkyldihydroxyacetonephosphate synthase, peroxisomal	AGPS
27.9475	28.6093	26.2953	28.3133	27.8696	28.0636			0.265234	1	-0.464835	-0.664087	0	O00139;A0A6Q8PGG1;A0A6Q8PGH7;A0A6Q8PFA6;A0A6Q8PG37;A0A6Q8PH57;D6R9M0;A0A6Q8PGD0	O00139;A0A6Q8PGG1;A0A6Q8PGH7;A0A6Q8PFA6;A0A6Q8PG37;A0A6Q8PH57;D6R9M0	Kinesin-like protein KIF2A	KIF2A
28.7046	29.3063	27.3723	29.0405	29.5977	28.924			0.525408	0.926965	-0.726355	-1.19453	0	O00148;K7EQN7;K7EPJ3;K7EN69;K7ENP6;K7EL56;K7EIL8;F6SXL5	O00148;K7EQN7	ATP-dependent RNA helicase DDX39A	DDX39A
29.687	29.6277	27.9287	29.8465	30.0611	29.9378			0.679825	0.655922	-0.867311	-1.49588	0	O00151	O00151	PDZ and LIM domain protein 1	PDLIM1
28.3874	28.8862	28.1039	28.7755	28.7743	28.5478			0.425525	1	-0.240038	-0.996554	0	O00154;K7EKP8	O00154;K7EKP8	Cytosolic acyl coenzyme A thioester hydrolase	ACOT7
26.726	27.3481	26.6995	27.078	27.4167	27.0869			0.490015	0.959355	-0.269328	-1.12485	0	O00161;H3BM38;H3BV99;H3BP15;H3BQY9;H3BNE1;H3BR18;H3BPJ0;H3BNG6;H3BU94	O00161;H3BM38;H3BV99;H3BP15;H3BQY9	Synaptosomal-associated protein 23;Synaptosomal-associated protein	SNAP23
26.3385	26.7586	25.1822	26.1667	25.7208	26.3872			0.000992245	1	0.00155322	0.00304283	0	O00186	O00186	Syntaxin-binding protein 3	STXBP3
28.4833	28.8665	28.113	28.4505	28.3913	28.2507			0.212422	1	0.12343	0.547475	0	O00203;H0YBD0	O00203	AP-3 complex subunit beta-1	AP3B1
29.9127	30.0552	29.753	29.8864	30.0602	29.9066			0.160564	1	-0.044089	-0.427636	0	O00231;J3QRY4;J3QS13;J3KSW3	O00231	26S proteasome non-ATPase regulatory subunit 11	PSMD11
28.3642	28.4978	28.1613	28.883	28.5632	29.1563			1.2521	0.21057	-0.526402	-2.6673	0	O00232;J3KTJ5;J3KSK1	O00232	26S proteasome non-ATPase regulatory subunit 12	PSMD12
28.4168	29.3077	28.4058	29.0862	29.4035	29.454			0.879043	0.402035	-0.604457	-1.8876	0	O00264;U3KQM0	O00264	Membrane-associated progesterone receptor component 1	PGRMC1
28.436	28.0284	27.8914	28.3556	28.4434	28.5822			0.904151	0.379765	-0.341761	-1.93778	0	O00267;M0QYL9	O00267	Transcription elongation factor SPT5	SUPT5H
28.0503	27.8917	27.1136	28.1516	28.4465	28.4211			1.00883	0.316217	-0.65453	-2.14995	0	O00273;K7ERT1	O00273	DNA fragmentation factor subunit alpha	DFFA
25.394	26.6942	26.1002	26.9763	26.9546	27.5122			1.22023	0.223938	-1.0849	-2.59723	0	O00291	O00291	Huntingtin-interacting protein 1	HIP1
32.9899	33.7717	31.426	32.895	33.0632	33.1895			0.17458	1	-0.320056	-0.460634	0	O00299	O00299	Chloride intracellular channel protein 1	CLIC1
27.4547	28.213	25.3064	27.5094	27.4583	27.5816			0.237148	1	-0.525031	-0.602665	0	O00330;H0YD97;E9PLU0;E9PRI6	O00330	Pyruvate dehydrogenase protein X component, mitochondrial	PDHX
29.8774	30.2063	28.6687	30.0975	30.047	30.1047			0.46058	0.997962	-0.498926	-1.06654	0	O00410;H0Y8C6;E7ETV3;E7EV12;E7EQT5;E7EWK4;E7EX05;C9JQT6;C9JZD8;E7ETV8;E7ESZ1;C9J875;C9JXE0;C9J583;C9JZ53;F8WF30	O00410;H0Y8C6	Importin-5	IPO5
29.0111	29.5554	28.068	28.8876	29.0354	28.7352			0.00586175	1	-0.00791995	-0.0178765	0	O00425;F8WD15	O00425	Insulin-like growth factor 2 mRNA-binding protein 3	IGF2BP3
27.5298	27.9652	26.0916	27.7302	27.6864	27.8245			0.413194	1	-0.55153	-0.971766	0	O00429;B4DPZ9;F8VZ52;F8W1W3;B4DDQ3;H0YHY4;F8VR28;F8VYL3;F8VUJ9	O00429	Dynamin-1-like protein	DNM1L
28.2157	27.4513	28.7453	25.6154	27.4995	28.0619			0.579239	0.832864	1.07847	1.29988	0	O00461;F8W785	O00461;F8W785	Golgi integral membrane protein 4	GOLIM4
26.7645	27.4619	24.4299	27.317	26.8049	26.9528			0.361859	1	-0.806141	-0.867419	0	O00462;E9PFW2;A0A2R8Y524;A0A2R8YEC9;A0A2R8YCE9;A0A2R8Y4U7;A0A2R8YE79;A0A2R8Y211;A0A2R8Y7A0;A0A2R8Y7A7;A0A2R8Y7N1	O00462;E9PFW2;A0A2R8Y524;A0A2R8YEC9;A0A2R8YCE9;A0A2R8Y4U7	Beta-mannosidase	MANBA
29.6958	30.2473	28.7195	30.001	29.837	29.9024			0.329142	1	-0.359251	-0.799744	0	O00487	O00487	26S proteasome non-ATPase regulatory subunit 14	PSMD14
29.4156	29.4609	29.2369	29.5585	29.8773	29.799			1.47161	0.142835	-0.37384	-3.17306	0	O00499	O00499	Myc box-dependent-interacting protein 1	BIN1
27.6802	28.3014	26.3541	28.0631	27.8857	27.9341			0.374937	1	-0.515715	-0.894198	0	O00505;H0Y4S9	O00505	Importin subunit alpha-4	KPNA3
29.3475	29.7147	27.7349	29.1048	29.2976	29.1624			0.156911	1	-0.255876	-0.418954	0	O00515;E9PDI4;A0A0J9YYF6;A0A0J9YW63;A0A0J9YVY2	O00515;E9PDI4;A0A0J9YYF6;A0A0J9YW63	Ladinin-1	LAD1
26.7299	27.3105	25.1187	26.7112	26.6626	26.7603			0.189511	1	-0.325013	-0.495272	0	O00560;B4DHN5;E9PBU7	O00560;B4DHN5;E9PBU7	Syntenin-1	SDCBP
28.1746	28.1442	27.0415	27.5187	28.4176	28.0484			0.173236	1	-0.208148	-0.457493	0	O00567;A0A494C128;H0YDU4;H0Y653;Q5JXT2	O00567;A0A494C128;H0YDU4	Nucleolar protein 56	NOP56
26.8503	27.625	24.5834	27.2685	27.3076	27.0016			0.385163	1	-0.839668	-0.915038	0	O00625	O00625	Pirin	PIR
26.7593	27.0515	24.7637	27.7511	27.8407	28.0136			1.09056	0.276287	-1.67695	-2.31953	0	O00743;Q5T1S7	O00743	Serine/threonine-protein phosphatase 6 catalytic subunit;Serine/threonine-protein phosphatase 6 catalytic subunit, N-terminally processed	PPP6C
27.0186	27.5848	26.137	27.1154	27.0191	27.7701			0.33109	1	-0.388072	-0.803801	0	O00754;M0QZ24;M0QZG6;M0R2P5	O00754	Lysosomal alpha-mannosidase;Lysosomal alpha-mannosidase A peptide;Lysosomal alpha-mannosidase B peptide;Lysosomal alpha-mannosidase C peptide;Lysosomal alpha-mannosidase D peptide;Lysosomal alpha-mannosidase E peptide	MAN2B1
28.1188	28.125	25.5854	29.2871	28.7408	28.3354			0.783927	0.490203	-1.51138	-1.69943	0	O00764;F2Z2Y4;A8MV33	O00764;F2Z2Y4	Pyridoxal kinase	PDXK
26.4369	26.8022	25.6338	26.8251	26.8523	27.0954			0.825255	0.441524	-0.633285	-1.78085	0	O14497;H0Y488;A0A1B0GTU5;A0A087WUV6;H0YCU6;H0YEW5	O14497;H0Y488;A0A1B0GTU5	AT-rich interactive domain-containing protein 1A	ARID1A
26.572	26.1413	25.59	26.5648	26.5069	26.4074			0.610775	0.774703	-0.391933	-1.36138	0	O14530;F8WCJ3;B8ZZX4;F8WBV5;G3XAJ4	O14530;F8WCJ3;B8ZZX4;F8WBV5;G3XAJ4	Thioredoxin domain-containing protein 9	TXNDC9
29.2222	29.7577	25.1482	28.5734	29.3718	28.7422			0.226082	1	-0.853074	-0.578104	0	O14561;H3BNK3	O14561;H3BNK3	Acyl carrier protein, mitochondrial;Acyl carrier protein	NDUFAB1
29.7015	29.9893	27.9943	29.9337	29.6831	29.4142			0.282174	1	-0.448653	-0.700558	0	O14579;M0QXB4;M0R061	O14579;M0QXB4;M0R061	Coatomer subunit epsilon	COPE
28.1059	28.8948	25.9493	28.5486	28.2344	28.5051			0.367935	1	-0.779376	-0.879878	0	O14617;A0A2R8Y611;A0A2R8Y4J3;A0A087WYN6;K7ERW8;K7ELX8	O14617;A0A2R8Y611	AP-3 complex subunit delta-1	AP3D1
26.5942	26.5064	27.2307	26.8769	26.9152	26.9473			0.23315	1	-0.136056	-0.593817	0	O14672;H0YNC5	O14672	Disintegrin and metalloproteinase domain-containing protein 10	ADAM10
29.1675	29.4226	28.1334	28.7446	28.6936	25.533			0.479479	0.972592	1.25078	1.10402	0	O14737;K7ESJ4;K7EQA1;Q3HM38;X6R2P6	O14737;K7ESJ4;K7EQA1	Programmed cell death protein 5	PDCD5
29.6265	30.0715	27.7225	29.9174	29.4741	29.7238			0.315906	1	-0.56492	-0.772054	0	O14744;G3V580;G3V2X6;G3V5L5;C9JSX3;H0YJX6;G3V2L6;H7BZ44;H0YJD3;G3V507;G3V2F5;G3V5T6;H0YJ77	O14744;G3V580	Protein arginine N-methyltransferase 5;Protein arginine N-methyltransferase 5, N-terminally processed	PRMT5
30.0563	30.6247	29.703	30.1559	29.9795	30.0972			0.0642053	1	0.0504595	0.184537	0	O14745;J3QRP6;J3QRA3	O14745;J3QRP6	Na(+)/H(+) exchange regulatory cofactor NHE-RF1	SLC9A3R1
31.3801	31.4077	30.0028	31.6292	31.7552	31.4613			0.657668	0.700122	-0.685012	-1.45272	0	O14818;H0Y586;Q8TAA3;A0A087WYS6;F5GY34	O14818;H0Y586	Proteasome subunit alpha type-7	PSMA7
28.3556	29.0687	28.2467	28.3245	28.705	28.6133			0.0109691	1	0.00938479	0.0332622	0	O14828	O14828	Secretory carrier-associated membrane protein 3	SCAMP3
29.6378	30.6337	28.3937	30.1978	30.0757	30.4016			0.438771	1	-0.669977	-1.02308	0	O14880;Q5VV89;Q5VV87	O14880;Q5VV89;Q5VV87	Microsomal glutathione S-transferase 3	MGST3
28.6915	29.5927	27.0949	29.0665	29.0822	29.1074			0.356598	1	-0.625676	-0.856605	0	O14907;A0A087X282	O14907	Tax1-binding protein 3	TAX1BP3
28.5028	28.8285	25.294	28.3391	28.5364	28.7602			0.370259	1	-1.00349	-0.884636	0	O14908;K7EM11;K7ELJ2;K7ESN1;A0A2R8Y651;Q8TF64	O14908;K7EM11	PDZ domain-containing protein GIPC1	GIPC1
28.6444	29.1106	28.5833	28.4851	28.1736	28.221			1.18646	0.245852	0.486199	2.52379	0	O14929;F8W9G7;F8WEW1	O14929	Histone acetyltransferase type B catalytic subunit	HAT1
26.2218	27.6325	25.0634	28.0713	28.232	28.2353			1.18269	0.24722	-1.87364	-2.51564	0	O14949	O14949	Cytochrome b-c1 complex subunit 8	UQCRQ
27.64	27.9434	27.3348	27.684	27.7515	27.7173			0.166788	1	-0.0782	-0.442351	0	O14974;F8VZN8;H0YIS4;H0YIM2;H0YHL8;H0YIS3;H0YHI8;A0A3B3ISH4;F8VW28;A0A0U1RQZ1	O14974;F8VZN8	Protein phosphatase 1 regulatory subunit 12A	PPP1R12A
28.164	28.9635	26.7341	28.9273	28.9138	28.9864			0.689728	0.632114	-0.988599	-1.51519	0	O14976;A0A087X1U9;D6RAW3;H0Y8H5;D6RF16;D6RAQ7;D6RE78	O14976	Cyclin-G-associated kinase	GAK
28.8462	29.142	28.223	29.1434	29.2755	29.5375			0.922682	0.374423	-0.581756	-1.97498	0	O14980;A0A7I2V2Y6;A0A7I2V461;A0A7I2YQV4;A0A7I2V3W6;A0A7I2V3P3;A0A7I2V2H0;A0A7I2V2S3;A0A7I2V3N0;A0A7I2YQX3;A0A7I2V4A3;C9JKM9;C9J673;A0A7I2V3J1;A0A7I2V2C5;A0A7I2YQP1;A0A7P0Z4B7;F8WF71;C9IYM2;A0A7I2V396	O14980;A0A7I2V2Y6;A0A7I2V461;A0A7I2YQV4;A0A7I2V3W6;A0A7I2V3P3;A0A7I2V2H0;A0A7I2V2S3;A0A7I2V3N0;A0A7I2YQX3;A0A7I2V4A3	Exportin-1	XPO1
27.0993	27.5208	27.1097	27.4843	27.5079	27.8014			0.964182	0.343631	-0.354638	-2.05883	0	O15031;E2PU09;A6QRH1;A6QRG9;H0Y6J7;H0Y7X5	O15031	Plexin-B2	PLXNB2
27.5114	27.4658	26.7175	26.9819	27.1054	27.2799			0.149934	1	0.109217	0.402271	0	O15042;E7ET15;E7EW00;H0Y8D9;H7C4V2	O15042;E7ET15	U2 snRNP-associated SURP motif-containing protein	U2SURP
28.7848	29.1831	28.0261	28.7175	28.7584	28.8329			0.111447	1	-0.104935	-0.307703	0	O15067;H0YGH1;J3KT98;J3KTQ5;J3QSG0;J3QSH6	O15067	Phosphoribosylformylglycinamidine synthase	PFAS
26.9803	27.2157	25.3872	27.1738	27.3107	27.6855			0.656702	0.702502	-0.862264	-1.45084	0	O15127;H3BV04;H3BN93;H3BUB6;H3BPL9	O15127;H3BV04;H3BN93;H3BUB6;H3BPL9	Secretory carrier-associated membrane protein 2	SCAMP2
30.6647	30.3894	30.0784	31.2117	30.506	30.4384			0.496909	0.959753	-0.341208	-1.13846	0	O15143;C9JEY1;C9K057;C9JBJ7;F8VXW2;C9JTT6;C9JM51;F8WEB3	O15143;C9JEY1;C9K057	Actin-related protein 2/3 complex subunit 1B	ARPC1B
29.6096	29.0846	28.9567	29.7327	29.6662	29.5524			0.983658	0.331344	-0.433488	-2.09845	0	O15144;C9JTV5;G5E9J0;H7C3F9;G5E9S7	O15144	Actin-related protein 2/3 complex subunit 2	ARPC2
27.8643	28.1808	24.6178	28.0403	28.321	28.5996			0.55156	0.893751	-1.43263	-1.24579	0	O15145;C9JZD1;F8VR50	O15145;C9JZD1;F8VR50	Actin-related protein 2/3 complex subunit 3	ARPC3
27.0996	26.1628	27.1864	28.0821	28.2846	28.4494			1.87243	0.0905231	-1.45575	-4.22586	0	O15160;E7EQB9;A0A2R8YEZ4;A0A2R8Y5D3;A0A2R8YEY5;H0Y723;A0A2R8Y8D6;D6RDJ3	O15160;E7EQB9;A0A2R8YEZ4;A0A2R8Y5D3;A0A2R8YEY5;H0Y723;A0A2R8Y8D6;D6RDJ3	DNA-directed RNA polymerases I and III subunit RPAC1	POLR1C
28.9903	29.1519	26.1662	28.5383	28.1307	25.4917			0.202997	1	0.715911	0.526133	0	O15212;A2AB88	O15212;A2AB88	Prefoldin subunit 6	PFDN6
26.996	26.6238	25.3054	26.955	27.1135	26.5083			0.433255	1	-0.550511	-1.01204	0	O15231;H7BZT5;H7C1R1	O15231;H7BZT5	Zinc finger protein 185	ZNF185
27.4506	26.8764	25.5435	27.4603	27.2452	27.2953			0.553125	0.893054	-0.710101	-1.24885	0	O15264;Q5R3E6;B5MDL5;P53778	O15264	Mitogen-activated protein kinase 13	MAPK13
28.1843	28.614	27.857	28.3352	28.5202	28.314			0.304992	1	-0.171346	-0.749073	0	O15269;A0A2R8Y4S0;A0A2R8Y6A2;A0A2R8Y763	O15269;A0A2R8Y4S0;A0A2R8Y6A2	Serine palmitoyltransferase 1	SPTLC1
27.9554	28.3407	27.9218	28.0259	28.2278	28.2077			0.211395	1	-0.0811844	-0.545159	0	O15294;C9JZL3	O15294	UDP-N-acetylglucosamine--peptide N-acetylglucosaminyltransferase 110 kDa subunit	OGT
28.8439	28.775	28.6932	29.0761	29.2067	29.0783	+	3ha_huvec	2.32996	0.0315	-0.349697	-5.70132	0	O15355	O15355	Protein phosphatase 1G	PPM1G
25.9593	26.7009	24.6126	25.5808	25.7797	25.9067			0.000975047	1	0.00184949	0.00299015	0	O15357;A0A0A0MTP6;H7BXR2;H0YFZ4;F5H588	O15357;A0A0A0MTP6	Phosphatidylinositol 3,4,5-trisphosphate 5-phosphatase 2	INPPL1
29.1092	29.7418	28.424	29.3914	29.1987	28.9693			0.08401	1	-0.0948003	-0.237249	0	O15371;B0QYA5;B0QYA6;B0QYA8;B0QYA4	O15371;B0QYA5	Eukaryotic translation initiation factor 3 subunit D	EIF3D
28.7009	29.3256	27.9227	28.671	28.6902	28.7772			0.0533401	1	-0.0630493	-0.154872	0	O15382;B3KSI3;M0QXF9;M0QZ10;M0QZP4;M0R2K7	O15382;B3KSI3;M0QXF9;M0QZ10;M0QZP4	Branched-chain-amino-acid aminotransferase, mitochondrial;Branched-chain-amino-acid aminotransferase	BCAT2
26.7922	26.9036	25.8197	26.5747	26.2834	26.4237			0.0773507	1	0.0778567	0.219711	0	O15397;F5H292;F5H2I3;F5GXT5;F5H244;F5H009;H0YH64	O15397	Importin-8	IPO8
25.6058	25.7941	26.1273	27.7908	26.9949	27.1412	+	3ha_huvec	2.15236	0.0465	-1.46651	-5.08803	0	O15400	O15400	Syntaxin-7	STX7
29.5039	29.8229	28.7681	29.7053	29.6146	29.635			0.384801	1	-0.286664	-0.914301	0	O15511;B1ALC0	O15511;B1ALC0	Actin-related protein 2/3 complex subunit 5	ARPC5
25.8824	26.814	24.8304	27.7204	26.9021	27.2832			1.10734	0.26738	-1.45963	-2.35484	0	O15514;E9PB93;E9PHV4	O15514;E9PB93;E9PHV4	DNA-directed RNA polymerase II subunit RPB4	POLR2D
29.8924	30.1719	29.142	29.8705	29.9436	30.0251			0.27215	1	-0.210971	-0.679025	0	O43143	O43143	Pre-mRNA-splicing factor ATP-dependent RNA helicase DHX15	DHX15
27.7741	27.9507	26.2525	27.5186	27.7037	27.6953			0.225976	1	-0.313446	-0.577867	0	O43172	O43172	U4/U6 small nuclear ribonucleoprotein Prp4	PRPF4
26.1028	28.6964	24.8881	27.0444	27.5587	27.5991			0.299351	1	-0.838308	-0.737141	0	O43181;H0Y9M8	O43181;H0Y9M8	NADH dehydrogenase [ubiquinone] iron-sulfur protein 4, mitochondrial	NDUFS4
29.326	29.9261	28.2387	29.3697	29.1635	29.6169			0.161618	1	-0.219761	-0.430136	0	O43237;J3KRI4;B4E2E0;J3KRZ2;H3BUM4;J3KSD2	O43237	Cytoplasmic dynein 1 light intermediate chain 2	DYNC1LI2
29.5612	29.837	29.5215	29.7005	29.8467	29.8006			0.588829	0.813395	-0.142664	-1.3186	0	O43242;H0YGV8;F5H8K4	O43242	26S proteasome non-ATPase regulatory subunit 3	PSMD3
28.6946	29.1796	27.9102	28.5297	28.5925	28.5676			0.0286342	1	0.0315475	0.0852035	0	O43252	O43252	Bifunctional 3-phosphoadenosine 5-phosphosulfate synthase 1;Sulfate adenylyltransferase;Adenylyl-sulfate kinase	PAPSS1
29.2731	29.2041	25.1195	29.2015	29.3944	29.3828			0.45861	0.997665	-1.46067	-1.06263	0	O43264;F5H3C1	O43264	Centromere/kinetochore protein zw10 homolog	ZW10
27.5601	27.0422	27.4391	27.8892	27.5557	27.994			1.06939	0.292251	-0.465874	-2.27524	0	O43278;H3BVD9;H3BR01;H3BMB6;H3BTQ8;H3BNW5;H3BSM2	O43278;H3BVD9;H3BR01;H3BMB6;H3BTQ8	Kunitz-type protease inhibitor 1	SPINT1
26.9802	27.6816	26.3896	26.8559	26.9519	26.6702			0.191411	1	0.191101	0.499644	0	O43290;E9PQI8	O43290	U4/U6.U5 tri-snRNP-associated protein 1	SART1
27.5848	28.3438	27.8123	28.0898	28.3202	28.0363			0.414852	1	-0.235139	-0.975104	0	O43324;D6RBD7;C9J1V9;H0YAL7;D6RCQ0	O43324;D6RBD7;C9J1V9;H0YAL7	Eukaryotic translation elongation factor 1 epsilon-1	EEF1E1;EEF1E1-BLOC1S5
29.8506	29.9599	29.9747	30.0627	30.2943	30.0771			1.2026	0.233653	-0.216293	-2.55878	0	O43390;B4DT28;A0A6Q8PH31;A0A6Q8PH35;A0A6Q8PEX7;A0A6Q8PHG0;A0A286YEZ8;A0A7I2V2F0	O43390;B4DT28;A0A6Q8PH31;A0A6Q8PH35;A0A6Q8PEX7	Heterogeneous nuclear ribonucleoprotein R	HNRNPR
26.6966	27.4732	24.5097	26.7375	26.9932	26.9848			0.310923	1	-0.678668	-0.76158	0	O43395	O43395	U4/U6 small nuclear ribonucleoprotein Prp3	PRPF3
29.9266	29.9204	29.4255	30.164	30.3912	30.4751			1.43247	0.14591	-0.585917	-3.0797	0	O43396;K7ER96;K7EML9;K7EPB7;K7EKG2;K7EME7	O43396;K7ER96	Thioredoxin-like protein 1	TXNL1
30.175	30.6012	29.7175	29.9158	30.1548	30.1796			0.109135	1	0.0810998	0.30187	0	O43399;A0A087WYR3;A0A087WZ51	O43399;A0A087WYR3;A0A087WZ51	Tumor protein D54	TPD52L2
26.9465	25.8627	25.6852	26.9956	27.1416	27.2018			1.11782	0.258921	-0.948214	-2.37699	0	O43402;M0R1B0	O43402;M0R1B0	ER membrane protein complex subunit 8	EMC8
29.9877	30.1894	27.9644	30.0566	30.1104	30.1256			0.431643	1	-0.717002	-1.00882	0	O43488;H3BLU7;H7C5H7	O43488;H3BLU7	Aflatoxin B1 aldehyde reductase member 2	AKR7A2
28.6019	29.2361	27.8493	28.7084	29.0362	28.1391			0.0468101	1	-0.0654996	-0.136769	0	O43504;R4GMU8;E9PLX3;A0A0C4DGV4	O43504;R4GMU8;E9PLX3;A0A0C4DGV4	Ragulator complex protein LAMTOR5	LAMTOR5
27.7617	28.1468	25.7223	27.8787	28.2893	27.8701			0.451839	1	-0.802452	-1.04915	0	O43583;F8VVL1	O43583;F8VVL1	Density-regulated protein	DENR
27.6022	28.3499	26.6164	27.8048	27.5604	27.631			0.100957	1	-0.142574	-0.281092	0	O43592;F8WDU6;F5GYW6;F5GZM3	O43592	Exportin-T	XPOT
28.9899	29.4918	27.7995	28.6953	28.8433	28.5652			0.0395499	1	0.0591488	0.116385	0	O43615;M0QXU7;M0R301;M0QXM9	O43615;M0QXU7	Mitochondrial import inner membrane translocase subunit TIM44	TIMM44
26.468	26.6632	26.3127	26.2469	25.9828	26.08			1.38483	0.159338	0.378057	2.968	0	O43617;A0A087WWM0;A6NKE1;A0A087WYS5	O43617;A0A087WWM0;A6NKE1	Trafficking protein particle complex subunit 3	TRAPPC3
27.3448	27.394	26.7021	27.7009	27.8829	27.1522			0.620126	0.760683	-0.431661	-1.3796	0	O43660;D6RA26;H0YA24;B7Z982;H0YAA2	O43660	Pleiotropic regulator 1	PLRG1
27.6984	28.644	27.2255	27.6615	27.8436	27.5438			0.151505	1	0.172983	0.40604	0	O43678	O43678	NADH dehydrogenase [ubiquinone] 1 alpha subcomplex subunit 2	NDUFA2
28.85	29.5496	28.0814	29.2432	28.6429	28.9084			0.0805601	1	-0.104549	-0.228186	0	O43681	O43681	ATPase ASNA1	ASNA1
27.0801	27.5973	26.916	26.672	27.0288	26.9043			0.64613	0.725883	0.329475	1.43025	0	O43719;Q5H919;Q5H918	O43719	HIV Tat-specific factor 1	HTATSF1
28.1607	28.6966	27.2993	27.9409	28.3138	28.4508			0.157774	1	-0.18296	-0.421008	0	O43747;H3BR36;H3BUN9;H3BNR4;H3BRM7;H3BN71;B4DGE1;B3KNW1;H3BS13;H3BV30	O43747	AP-1 complex subunit gamma-1	AP1G1
31.3808	31.8477	29.7621	31.3267	31.2542	31.1707			0.149167	1	-0.253681	-0.40043	0	O43776;K7EIU7;K7EQ35;K7EJ19;K7EPK2;K7EMQ6	O43776	Asparagine--tRNA ligase, cytoplasmic	NARS
29.8025	29.7872	28.7445	29.9683	30.0413	29.6335			0.514347	0.941924	-0.436242	-1.1728	0	O43809;H3BND3;H3BV41	O43809;H3BND3	Cleavage and polyadenylation specificity factor subunit 5	NUDT21
28.9116	28.7373	24.641	28.6341	28.8163	28.1822			0.325114	1	-1.11426	-0.791336	0	O43813;E9PHS0;F8WDS9;H7C2E3	O43813;E9PHS0	LanC-like protein 1	LANCL1
27.0309	28.1685	26.7217	27.3116	27.1836	27.37			0.0138938	1	0.0186183	0.0419958	0	O43815	O43815	Striatin	STRN
27.1407	27.6512	24.9671	27.7539	27.4488	26.8185			0.362609	1	-0.754062	-0.868958	0	O43818	O43818	U3 small nucleolar RNA-interacting protein 2	RRP9
28.7904	29.5367	27.808	29.3551	29.3735	29.148			0.501637	0.955683	-0.580511	-1.14778	0	O43852;H0Y875	O43852	Calumenin	CALU
28.0327	28.2047	24.4317	28.5147	28.22	26.7285			0.277543	1	-0.931348	-0.690628	0	O43865	O43865	Putative adenosylhomocysteinase 2	AHCYL1
26.8383	26.4481	24.8938	27.0894	27.1738	27.388			0.898555	0.381896	-1.15697	-1.92658	0	O43920	O43920	NADH dehydrogenase [ubiquinone] iron-sulfur protein 5	NDUFS5
28.0355	25.6986	24.8832	27.0898	27.9351	27.6321			0.619814	0.758346	-1.34655	-1.379	0	O60216;E5RJW1;E5RJK5;E5RFV8;E5RIN7;E5RFZ5;A0A140T8W2;E5RG18;E5RI01;A0A804HJ87;Q9H4I0	O60216	Double-strand-break repair protein rad21 homolog	RAD21
29.956	30.6342	28.6439	30.878	30.958	30.9302			0.941903	0.359382	-1.17734	-2.01372	0	O60218;C9JRZ8	O60218	Aldo-keto reductase family 1 member B10	AKR1B10
27.9537	28.6555	25.3414	27.5824	27.1965	27.6593			0.0550565	1	-0.162533	-0.159595	0	O60231;A0A140T947;Q5SQH5;A0A140T8Y5;A0A140T9T4;A2AB15	O60231;A0A140T947;Q5SQH5	Putative pre-mRNA-splicing factor ATP-dependent RNA helicase DHX16	DHX16
27.6814	27.7392	26.885	27.3953	27.6295	25.0076			0.357902	1	0.757769	0.859288	0	O60232;G3V1B8;H0YEB6;E9PN57;E9PK41;H0YEK1	O60232;G3V1B8;H0YEB6	Sjoegren syndrome/scleroderma autoantigen 1	SSSCA1
28.2922	28.3878	27.5307	28.1516	27.6271	28.18			0.0920341	1	0.0839876	0.258146	0	O60256;E7EPA1;C9JDU5;C9JJS3;C9K0K7;I3L0S1;C9JDH0;E7EW35;I3L331;I3L164;I3L4G9;I3L1T1;I3L3B8;I3L2J4;I3L275	O60256;E7EPA1;C9JDU5;C9JJS3;C9K0K7	Phosphoribosyl pyrophosphate synthase-associated protein 2	PRPSAP2
26.0828	26.0396	25.6544	25.8796	26.1758	26.7459			0.520166	0.935337	-0.341506	-1.18424	0	O60264	O60264	SWI/SNF-related matrix-associated actin-dependent regulator of chromatin subfamily A member 5	SMARCA5
28.2427	29.102	25.8797	28.4117	28.547	28.6959			0.347505	1	-0.810097	-0.837853	0	O60271;A0A087X2D8;H0YBE9;H0YBS5	O60271;A0A087X2D8	C-Jun-amino-terminal kinase-interacting protein 4	SPAG9
27.3598	27.4617	24.6469	26.7049	26.8374	27.1713			0.168044	1	-0.415091	-0.445307	0	O60306;H0YH15;H0YLN9	O60306	Intron-binding protein aquarius	AQR
27.2736	27.1484	25.4312	27.1451	26.9322	27.371			0.365512	1	-0.531701	-0.874913	0	O60313;A0A2R8Y3X5;A0A2R8YE78;A0A2R8YDM2;C9JMB8;E5KLJ9;A0A2R8YGE5;A0A2R8YD53;A0A2R8YFD1;A0A2R8Y4G4;A0A2R8Y4Q3;A0A2R8YE54;C9JY58;H7C3G2;H7C141;A0A2R8Y5G3	O60313;A0A2R8Y3X5;A0A2R8YE78;A0A2R8YDM2;C9JMB8;E5KLJ9;A0A2R8YGE5;A0A2R8YD53;A0A2R8YFD1;A0A2R8Y4G4;A0A2R8Y4Q3	Dynamin-like 120 kDa protein, mitochondrial;Dynamin-like 120 kDa protein, form S1	OPA1
27.4001	27.8497	24.9991	27.5965	27.5366	27.3854			0.354776	1	-0.756521	-0.852853	0	O60341;R4GMQ1;R4GMP9	O60341;R4GMQ1	Lysine-specific histone demethylase 1A	KDM1A
28.8639	28.7014	28.2017	29.0206	28.979	28.9833			0.949828	0.358323	-0.405336	-2.02974	0	O60343;A0A3B3IRT3;Q5JU47;C9JIE2;Q86TI0	O60343;A0A3B3IRT3	TBC1 domain family member 4	TBC1D4
26.7953	27.4401	26.4353	27.4961	27.2557	26.8056			0.342894	1	-0.295568	-0.828315	0	O60488;A0A804HI36;D6RF95;H0Y9A0;D6RDA8	O60488;A0A804HI36	Long-chain-fatty-acid--CoA ligase 4	ACSL4
27.4876	28.3346	27.748	27.5893	24.912	27.7161			0.517461	0.941554	1.11761	1.17892	0	O60493	O60493	Sorting nexin-3	SNX3
27.7066	28.4435	26.2708	27.4917	27.5636	27.6412			0.0493111	1	-0.091898	-0.143727	0	O60502;H7C3X0	O60502	Protein O-GlcNAcase	MGEA5
31.3709	31.8557	30.3804	31.8046	31.6314	31.4977			0.426195	1	-0.442206	-0.997898	0	O60506;A0A7I2V309;A0A7I2V2F2	O60506;A0A7I2V309;A0A7I2V2F2	Heterogeneous nuclear ribonucleoprotein Q	SYNCRIP
29.8433	29.626	28.321	30.1234	29.8716	30.0243			0.704881	0.60016	-0.74297	-1.54474	0	O60547	O60547	GDP-mannose 4,6 dehydratase	GMDS
27.4626	27.4214	26.1501	27.4007	27.7831	27.7614			0.641402	0.731266	-0.63701	-1.42104	0	O60568;H7C2S8;H7C2V1;H7C0B8	O60568	Procollagen-lysine,2-oxoglutarate 5-dioxygenase 3	PLOD3
30.9024	31.3002	30.2189	30.822	30.8877	30.8186			0.0381235	1	-0.0355625	-0.112348	0	O60664;K7ERZ3;K7EL96;K7ER39	O60664;K7ERZ3;K7EL96	Perilipin-3	PLIN3
28.4558	28.7102	27.2011	28.7835	28.6953	28.5042			0.496231	0.959893	-0.538636	-1.13712	0	O60684;O15131;Q5TFJ7;S4R3E5	O60684;O15131;Q5TFJ7	Importin subunit alpha-7;Importin subunit alpha-6	KPNA6;KPNA5
31.6195	32.1532	30.8204	31.9721	32.3349	32.3015			0.764862	0.505347	-0.671813	-1.66201	0	O60701;E7ER83;E7ETF4;E7EV97;E7ER95;D6RHF4;E9PBD2	O60701	UDP-glucose 6-dehydrogenase	UGDH
29.0046	27.7992	28.3353	28.7208	28.9628	28.9434			0.624603	0.761722	-0.49596	-1.38832	0	O60749;D6RC15	O60749	Sorting nexin-2	SNX2
28.2056	28.8837	28.0614	28.797	28.6602	28.9029			0.698536	0.615733	-0.403111	-1.53236	0	O60763;REV__R4GMN2;REV__Q5VZ89	O60763	General vesicular transport factor p115	USO1
27.4579	28.0462	25.0647	27.8661	27.9706	27.6146			0.450677	1	-0.960831	-1.04684	0	O60784;B0QY01;V9GZ68;V9GYF4;B0QY02	O60784	Target of Myb protein 1	TOM1
26.7225	27.1597	24.8799	26.7104	27.2234	27.1064			0.457892	0.99707	-0.759391	-1.0612	0	O60826	O60826	Coiled-coil domain-containing protein 22	CCDC22
27.0486	26.983	27.1322	26.8757	27.302	27.4674			0.369929	1	-0.160399	-0.883961	0	O60828;H7C053;A0A5H1ZRR1	O60828;H7C053;A0A5H1ZRR1	Polyglutamine-binding protein 1	PQBP1
28.7564	29.4417	27.8377	28.8399	28.4847	28.7908			0.0184727	1	-0.0265452	-0.0555597	0	O60832;C9IYT0;H7C0M1;H7C2Q9;H7C2Q2;H7BZF2	O60832;C9IYT0;H7C0M1	H/ACA ribonucleoprotein complex subunit 4	DKC1
28.5792	28.6291	28.9234	28.7941	28.5409	28.3243			0.382593	1	0.157478	0.909808	0	O60869	O60869	Endothelial differentiation-related factor 1	EDF1
27.9118	28.582	27.8711	28.2908	28.358	28.5331			0.491368	0.962529	-0.272345	-1.12752	0	O60884;A0A087WT48;I3L320	O60884	DnaJ homolog subfamily A member 2	DNAJA2
27.6573	27.9054	27.6308	27.3687	27.9997	27.9306			0.0556706	1	-0.0351766	-0.161282	0	O60885;M0QZD9;M0R0H4;M0QYW0	O60885;M0QZD9	Bromodomain-containing protein 4	BRD4
30.9338	31.1107	29.2506	31.0821	30.8816	31.0492			0.407762	1	-0.572625	-0.960814	0	O75083;D6RD66	O75083	WD repeat-containing protein 1	WDR1
28.5629	28.8774	26.4234	28.4525	28.488	28.3737			0.247991	1	-0.48348	-0.626528	0	O75116;E9PF63;Q14DU5;D6REE7;C9JFJ0	O75116;E9PF63;Q14DU5	Rho-associated protein kinase 2	ROCK2
28.6375	29.7329	28.2301	28.9689	28.9039	28.979			0.064908	1	-0.0837688	-0.186436	0	O75131;A0A087WYQ3;A0A087WXR6;E5RHZ0;H0YB26;A0A087WUS8;E5RFT7	O75131;A0A087WYQ3	Copine-3	CPNE3
26.1026	26.4858	25.0931	26.5835	26.4217	26.4264			0.62705	0.755641	-0.583335	-1.39309	0	O75165;A0A3B3IRM0;H0YA63;H0Y8Q2	O75165	DnaJ homolog subfamily C member 13	DNAJC13
28.1729	28.4837	27.5432	28.4737	28.1474	28.1687			0.265293	1	-0.196643	-0.664215	0	O75223;M0QZK8;B8ZZK2;H7BZK5;A0A0B4J1Y4	O75223;M0QZK8;B8ZZK2	Gamma-glutamylcyclotransferase	GGCT
30.5966	31.045	30.077	30.6216	31.1221	30.9907			0.460861	1	-0.338578	-1.0671	0	O75306;A0A7I2YQG7;A0A7I2V4X8;A0A7I2V596;A0A7I2V630;A0A7I2V410;A0A7I2V4W5;A0A7I2V2B9;A0A7I2V3J6;A0A7I2V4G5;A0A7I2V5E2;A0A7I2YQD8;A0A7I2V5G4;A0A7I2V5D5;A0A7I2V517	O75306;A0A7I2YQG7;A0A7I2V4X8;A0A7I2V596;A0A7I2V630;A0A7I2V410;A0A7I2V4W5;A0A7I2V2B9;A0A7I2V3J6;A0A7I2V4G5;A0A7I2V5E2;A0A7I2YQD8;A0A7I2V5G4	NADH dehydrogenase [ubiquinone] iron-sulfur protein 2, mitochondrial	NDUFS2
28.3703	28.8029	27.4373	28.3332	28.4985	28.3138			0.164936	1	-0.178342	-0.437982	0	O75340;A0A024QZ42;H0Y9X3;A0A087WZ38	O75340;A0A024QZ42	Programmed cell death protein 6	PDCD6
29.2581	26.3756	24.4054	29.5286	29.6784	29.671			0.979359	0.332025	-2.94629	-2.08969	0	O75348;A0A7I2V4K4;A0A7I2V3Q6;A0A7I2V375;A0A7I2V2N1;A0A7I2YQH3;F2Z307;O95670	O75348;A0A7I2V4K4;A0A7I2V3Q6;A0A7I2V375	V-type proton ATPase subunit G 1	ATP6V1G1
28.5133	28.2635	27.1256	28.4449	28.8599	28.0341			0.416785	1	-0.478811	-0.978994	0	O75351;Q6PIW4	O75351	Vacuolar protein sorting-associated protein 4B	VPS4B
30.8365	30.8437	29.6991	31.1427	31.2527	31.1031			0.857384	0.415365	-0.706371	-1.8445	0	O75367;B4DJC3;D6RCF2;A0A7I2V4D9;A0A7I2YQB9	O75367;B4DJC3	Core histone macro-H2A.1;Histone H2A	H2AFY
28.4531	28.8594	28.1016	28.6241	28.8311	28.8902			0.594991	0.804041	-0.310471	-1.33061	0	O75368	O75368	SH3 domain-binding glutamic acid-rich-like protein	SH3BGRL
27.5898	27.4402	24.7323	27.4518	27.6381	27.5828			0.448727	1	-0.970156	-1.04295	0	O75380;D6RBT3	O75380;D6RBT3	NADH dehydrogenase [ubiquinone] iron-sulfur protein 6, mitochondrial	NDUFS6
25.7825	26.5964	24.5853	26.7629	26.6094	26.8529			0.858866	0.415157	-1.08699	-1.84744	0	O75381;K7EK59	O75381	Peroxisomal membrane protein PEX14	PEX14
28.4408	28.696	27.4085	28.8901	29.3711	29.0148			1.01939	0.310319	-0.910218	-2.17166	0	O75396;A0A087X1A9	O75396	Vesicle-trafficking protein SEC22b	SEC22B
28.1995	28.7571	25.8367	27.8929	28.0944	27.8666			0.146359	1	-0.353527	-0.393672	0	O75400;A0A7N4I394;F5H578	O75400;A0A7N4I394	Pre-mRNA-processing factor 40 homolog A	PRPF40A
27.2946	27.9179	26.7571	27.7693	27.7367	27.6822			0.532094	0.917285	-0.406215	-1.20765	0	O75410;E7ET87;E7EVI4;H0YAY0;E5RFM9;R4GMT7;H0YBT8;B4E3H6;E5RJU4;A0A0C4DGD3;A0A0C4DGD5;E5RIP3;E5RJG6	O75410;E7ET87;E7EVI4;H0YAY0;E5RFM9;R4GMT7;H0YBT8	Transforming acidic coiled-coil-containing protein 1	TACC1
29.4326	29.7965	28.3352	29.4581	29.495	29.5042			0.271394	1	-0.297674	-0.677397	0	O75436;S4R3Q6;S4R2Y3	O75436;S4R3Q6	Vacuolar protein sorting-associated protein 26A	VPS26A
27.5276	27.8647	27.1695	27.7364	27.9801	27.6202			0.496602	0.960247	-0.258309	-1.13785	0	O75439;G3V0E4;F8WAZ6;F8WEA6;F8WBE1	O75439;G3V0E4	Mitochondrial-processing peptidase subunit beta	PMPCB
28.0124	28.3639	27.3058	28.2893	28.4955	28.091			0.526835	0.922407	-0.397872	-1.19734	0	O75475	O75475	PC4 and SFRS1-interacting protein	PSIP1
28.4842	29.5084	28.1485	28.7057	28.7908	28.4675			0.0481052	1	0.0589975	0.140376	0	O75489;E9PS48;G3V194	O75489	NADH dehydrogenase [ubiquinone] iron-sulfur protein 3, mitochondrial	NDUFS3
31.1617	31.9467	25.4848	30.9805	30.9944	31.4026			0.320435	1	-1.59473	-0.781549	0	O75531	O75531	Barrier-to-autointegration factor;Barrier-to-autointegration factor, N-terminally processed	BANF1
28.9589	29.4164	27.8304	28.8657	28.9381	28.9961			0.156885	1	-0.198061	-0.418892	0	O75533;H7C341;B4DGZ4;A0A494C1M2	O75533	Splicing factor 3B subunit 1	SF3B1
27.3324	27.6718	27.2374	27.3154	27.2068	27.4993			0.177367	1	0.0733763	0.467139	0	O75534;E9PLT0;E9PLD4;E9PNG3;E9PKN4	O75534;E9PLT0	Cold shock domain-containing protein E1	CSDE1
27.3608	27.8165	24.9216	26.985	27.2675	27.76			0.276432	1	-0.637847	-0.688241	0	O75600;H7BZ75;C9IZC9;F2Z340	O75600	2-amino-3-ketobutyrate coenzyme A ligase, mitochondrial	GCAT
28.8954	28.1652	28.3351	28.6725	26.0142	25.629			0.79672	0.48126	1.69333	1.72459	0	O75608;A0A087X1K9;E5RGR0;B4DP64;E5RJ48	O75608;A0A087X1K9;E5RGR0;B4DP64	Acyl-protein thioesterase 1	LYPLA1
28.9131	29.6497	27.7546	28.8976	29.0049	29.0054			0.130935	1	-0.196862	-0.356154	0	O75643;A0A494C1A5	O75643;A0A494C1A5	U5 small nuclear ribonucleoprotein 200 kDa helicase	SNRNP200
27.5736	27.0354	24.8809	27.4112	27.292	27.0828			0.389618	1	-0.76537	-0.924092	0	O75663	O75663	TIP41-like protein	TIPRL
26.3255	26.5426	25.121	26.3577	26.7341	26.7781			0.608832	0.776121	-0.626984	-1.3576	0	O75718;C9JP16	O75718;C9JP16	Cartilage-associated protein	CRTAP
26.4961	27.6407	26.0923	26.051	26.7056	26.2441			0.336217	1	0.409468	0.814466	0	O75792;A0A2R8Y606;A0A2R8Y658	O75792	Ribonuclease H2 subunit A	RNASEH2A
29.6427	30.1548	28.484	29.4748	29.6502	29.703			0.134569	1	-0.182161	-0.365057	0	O75821;K7EL20;K7ER90;K7ENA8;K7EP16;K7EL60;K7ENH0	O75821;K7EL20;K7ER90;K7ENA8	Eukaryotic translation initiation factor 3 subunit G	EIF3G
28.885	29.2476	28.2498	29.2071	29.1244	29.2993			0.633697	0.742528	-0.416104	-1.40604	0	O75822;H0YGJ7;H0YLP3	O75822	Eukaryotic translation initiation factor 3 subunit J	EIF3J
25.9113	26.2648	25.164	25.9805	26.1168	26.6859			0.545591	0.899867	-0.481068	-1.2341	0	O75844;A0A6Q8PHG9;A0A6Q8PF67;A0A6Q8PH40	O75844	CAAX prenyl protease 1 homolog	ZMPSTE24
30.7182	31.1694	29.4862	31.005	30.9815	31.3065			0.551197	0.892189	-0.639734	-1.24508	0	O75874;C9J4N6;C9JJE5;C9JLU6	O75874	Isocitrate dehydrogenase [NADP] cytoplasmic	IDH1
27.6048	28.1692	26.1945	27.3628	27.6292	27.0946			0.0216149	1	-0.0393384	-0.0647924	0	O75884	O75884	Putative hydrolase RBBP9	RBBP9
28.999	29.4692	27.6477	29.2356	29.2699	29.4927			0.496131	0.959289	-0.627443	-1.13692	0	O75891;C9IZ36;C9JYZ6;C9JY00;D6RFJ7;F2Z324;F8WC34;A0A494C1M4;Q3SY69	O75891	Cytosolic 10-formyltetrahydrofolate dehydrogenase	ALDH1L1
27.4522	27.6836	25.4991	26.9455	27.2197	26.5494			0.0121841	1	-0.0265522	-0.0368972	0	O75909;G3V2Q3;G3V5E1;G3V235	O75909;G3V2Q3;G3V5E1	Cyclin-K	CCNK
26.3615	26.6911	25.1097	26.9171	27.9264	26.9745			0.980731	0.33278	-1.21857	-2.09249	0	O75915;F8WF90;C9JQU6;F8WF33	O75915;F8WF90;C9JQU6;F8WF33	PRA1 family protein 3	ARL6IP5
28.3424	28.5526	27.5244	28.0347	28.037	28.4283			0.0264886	1	-0.0268447	-0.0789951	0	O75934	O75934	Pre-mRNA-splicing factor SPF27	BCAS2
27.4471	26.0756	25.1435	27.9052	27.9792	27.983			1.21678	0.226383	-1.73376	-2.58968	0	O75937;S4R3J5	O75937	DnaJ homolog subfamily C member 8	DNAJC8
28.0965	28.2286	27.0006	27.838	28.2509	28.697			0.454615	1	-0.486741	-1.05468	0	O75940;A0A6Q8PG47;A0A6Q8PFX6	O75940	Survival of motor neuron-related-splicing factor 30	SMNDC1
28.2041	28.4247	28.3064	27.9547	28.109	28.0165			1.66479	0.133619	0.284994	3.657	0	O75947;F5H608	O75947	ATP synthase subunit d, mitochondrial	ATP5H
25.9729	27.5311	25.3263	26.3454	26.1079	26.6005			0.0377263	1	-0.0744775	-0.111221	0	O75955;A0A140T9R1;A2AB10;A2AB12;A2AB13;A0A0G2JJQ6;A2AB11;A2AB09;A0A140T9X0;A0A140T9W4;A0A140T974;A0A140T959;A0A140T9C3;A0A140T910;A0A140T957;A0A140T9B1;A0A140T907	O75955;A0A140T9R1;A2AB10;A2AB12;A2AB13;A0A0G2JJQ6;A2AB11	Flotillin-1	FLOT1
25.9303	26.811	25.4029	26.4493	25.8615	26.4986			0.184274	1	-0.221734	-0.483182	0	O75976;J3QRJ9;J3QQJ4	O75976	Carboxypeptidase D	CPD
29.0645	29.1877	27.8699	29.2187	29.0433	29.0229			0.383865	1	-0.387607	-0.912397	0	O76003	O76003	Glutaredoxin-3	GLRX3
27.4289	28.2326	26.5915	27.1966	27.2995	27.4506			0.0748097	1	0.102117	0.21297	0	O76031;H0YM48;H0YK07	O76031	ATP-dependent Clp protease ATP-binding subunit clpX-like, mitochondrial	CLPX
26.8801	27.8041	25.1468	27.0879	27.1569	27.2861			0.293888	1	-0.566671	-0.725548	0	O76071	O76071	Probable cytosolic iron-sulfur protein assembly protein CIAO1	CIAO1
29.2562	29.1351	28.3469	29.1846	29.0452	29.3352			0.391346	1	-0.275593	-0.927599	0	O76094;D6RDY6;R4GNC1	O76094;D6RDY6	Signal recognition particle subunit SRP72	SRP72
30.4037	31.0529	28.9458	30.6382	30.5588	30.6343			0.312017	1	-0.476319	-0.763881	0	O94760;B4DYP1	O94760;B4DYP1	N(G),N(G)-dimethylarginine dimethylaminohydrolase 1	DDAH1
28.7608	28.4577	26.9854	27.7455	27.8627	28.0173			0.127645	1	0.192795	0.34806	0	O94776	O94776	Metastasis-associated protein MTA2	MTA2
28.4847	29.0052	26.8811	28.5422	28.4627	28.9001			0.321034	1	-0.511326	-0.782804	0	O94826	O94826	Mitochondrial import receptor subunit TOM70	TOMM70A
28.5145	29.2259	27.4678	28.4162	28.6778	28.4247			0.069909	1	-0.103497	-0.199892	0	O94832;K7EIG7;J3QRN6;J3KRL0;F8WEW9;A0A3B3IU30;B0I1T2	O94832;K7EIG7;J3QRN6	Unconventional myosin-Id	MYO1D
28.0745	28.9948	26.3718	28.2977	28.2643	28.2429			0.232111	1	-0.454573	-0.591513	0	O94855;E9PDM8;E9PC44	O94855;E9PDM8	Protein transport protein Sec24D	SEC24D
27.5497	27.8655	25.9345	26.9964	27.0511	27.1457			0.0292638	1	0.0521787	0.0870202	0	O94874	O94874	E3 UFM1-protein ligase 1	UFL1
28.0878	27.9816	27.1533	28.1956	28.0235	28.4039			0.672141	0.676	-0.466806	-1.48091	0	O94903;E5RFX7;E5RG77;E5RFZ4;H0YBG2	O94903;E5RFX7;E5RG77	Proline synthase co-transcribed bacterial homolog protein	PROSC
28.6301	29.0722	28.3315	29.1834	28.996	29.1415			0.899154	0.382877	-0.429	-1.92777	0	O94905;E5RHW4;E5RJ09	O94905;E5RHW4	Erlin-2	ERLIN2
26.7503	26.9936	26.8818	26.831	26.8292	27.0039			0.048078	1	-0.0127799	-0.1403	0	O94906	O94906	Pre-mRNA-processing factor 6	PRPF6
28.2422	28.1881	27.8009	28.6116	28.3429	28.2837			0.912556	0.373967	-0.335648	-1.95464	0	O94925;H7BZD1;B7Z509;C9JIJ6;H7C201	O94925	Glutaminase kidney isoform, mitochondrial	GLS
27.9404	28.2134	27.758	27.9116	28.3395	28.3239			0.501359	0.955953	-0.221086	-1.14723	0	O94973;A0A0G2JS82;E9PR62;A0A0G2JRF9;A0A0G2JQA4;A0A0G2JRS3;E9PNC4	O94973;A0A0G2JS82	AP-2 complex subunit alpha-2	AP2A2
27.649	27.6012	27.2261	27.5943	28.0508	28.1752			0.946366	0.359172	-0.448011	-2.02273	0	O94992	O94992	Protein HEXIM1	HEXIM1
27.9255	28.7591	26.307	27.7007	27.4587	27.4204			0.0659647	1	0.137267	0.189289	0	O95104	O95104	Splicing factor, arginine/serine-rich 15	SCAF4
26.8413	27.857	25.5111	27.2759	27.0526	27.0425			0.220878	1	-0.387174	-0.566476	0	O95154	O95154	Aflatoxin B1 aldehyde reductase member 3	AKR7A3
27.6581	28.1246	26.9961	27.8561	27.996	28.1415			0.527924	0.92035	-0.404923	-1.19947	0	O95155;B1AQ61;K7EP75	O95155	Ubiquitin conjugation factor E4 B	UBE4B
27.9422	28.4269	26.3123	27.7113	28.0908	27.623			0.13996	1	-0.247894	-0.378192	0	O95163;A0A6Q8PHC9;A0A6Q8PHF4;A0A6Q8PG86;A0A6Q8PEX6;A0A6Q8PFB7;A0A6Q8PFH9;A0A6Q8PGW3;A0A6Q8PHI5;A0A6Q8PH48;A0A6Q8PF66;F5H2T0;A0A6Q8PFN8;A0A6Q8PHA0;A0A6Q8PGR0;A0A6Q8PF69;A0A6Q8PGA6;A0A6Q8PFC8;A0A6Q8PGC4;A0A6Q8PH36;H0YDF3;A0A6Q8PFX1	O95163;A0A6Q8PHC9;A0A6Q8PHF4;A0A6Q8PG86;A0A6Q8PEX6;A0A6Q8PFB7;A0A6Q8PFH9;A0A6Q8PGW3;A0A6Q8PHI5;A0A6Q8PH48;A0A6Q8PF66;F5H2T0;A0A6Q8PFN8;A0A6Q8PHA0;A0A6Q8PGR0;A0A6Q8PF69	Elongator complex protein 1	IKBKAP
28.7876	29.0981	27.9224	28.7619	28.8898	28.815			0.245355	1	-0.219567	-0.620745	0	O95202	O95202	LETM1 and EF-hand domain-containing protein 1, mitochondrial	LETM1
28.412	28.7007	26.4785	28.84	28.4283	28.5569			0.453054	1	-0.744678	-1.05157	0	O95292;E5RK64	O95292	Vesicle-associated membrane protein-associated protein B/C	VAPB
27.7036	28.8656	25.0727	28.2845	27.7843	27.7437			0.252896	1	-0.723511	-0.637259	0	O95295	O95295	SNARE-associated protein Snapin	SNAPIN
30.1781	30.77	28.986	29.9814	30.253	30.1492			0.101488	1	-0.149853	-0.282449	0	O95336;M0R261;M0R1L2;M0R0U3	O95336;M0R261	6-phosphogluconolactonase	PGLS
27.2933	28.3929	27.5014	27.3265	27.008	27.5834			0.490322	0.959427	0.423244	1.12546	0	O95340	O95340	Bifunctional 3-phosphoadenosine 5-phosphosulfate synthase 2;Sulfate adenylyltransferase;Adenylyl-sulfate kinase	PAPSS2
27.9222	29.194	24.8537	28.0363	27.6267	27.1979			0.0799461	1	-0.296979	-0.226568	0	O95347;A0A0C4DGE5;Q5T821	O95347	Structural maintenance of chromosomes protein 2	SMC2
29.9893	30.1086	28.2562	29.9997	29.1746	28.7637			0.0692252	1	0.138691	0.198058	0	O95372;Q5QPQ1;Q5QPQ0;Q5QPN5;Q5QPN9;Q5QPQ3;Q5QPQ2	O95372;Q5QPQ1;Q5QPQ0	Acyl-protein thioesterase 2	LYPLA2
29.4466	29.9836	28.7527	29.6673	29.6102	29.8262			0.352255	1	-0.306946	-0.847659	0	O95373;E9PLJ0	O95373	Importin-7	IPO7
26.5303	26.9061	26.0657	26.3146	26.4631	26.413			0.157485	1	0.103792	0.420319	0	O95396	O95396	Adenylyltransferase and sulfurtransferase MOCS3;Molybdopterin-synthase adenylyltransferase;Molybdopterin-synthase sulfurtransferase	MOCS3
28.9664	29.0473	28.0814	28.9984	28.6665	29.2408			0.314466	1	-0.270168	-0.769031	0	O95433;G3V438;H0YJG7;H0YJ63;H0YJU2;G3V3W9	O95433;G3V438;H0YJG7	Activator of 90 kDa heat shock protein ATPase homolog 1	AHSA1
27.1984	28.0194	25.4572	27.6742	27.8547	28.0202			0.557471	0.888417	-0.958048	-1.25735	0	O95456;F8WBH7	O95456	Proteasome assembly chaperone 1	PSMG1
27.4748	27.8964	24.8531	27.2982	27.2111	27.5212			0.249353	1	-0.602097	-0.629512	0	O95478;A0A0A0MQZ6;H0YAI9	O95478;A0A0A0MQZ6	Ribosome biogenesis protein NSA2 homolog	NSA2
28.2308	29.1927	26.7058	28.1669	28.4096	28.337			0.132197	1	-0.26138	-0.359251	0	O95486;H0Y9J6	O95486	Protein transport protein Sec24A	SEC24A
26.8827	27.9769	25.295	27.1654	27.3274	26.6894			0.160369	1	-0.342491	-0.427174	0	O95487	O95487	Protein transport protein Sec24B	SEC24B
30.3394	30.6577	30.0254	30.33	30.4007	29.9248			0.200375	1	0.122323	0.520161	0	O95571;M0QXB5;M0QY80;M0QX80	O95571;M0QXB5	Persulfide dioxygenase ETHE1, mitochondrial	ETHE1
27.2104	27.9869	26.2408	26.8461	27.0157	27.1031			0.111874	1	0.157685	0.308777	0	O95602;B9ZVN9	O95602;B9ZVN9	DNA-directed RNA polymerase I subunit RPA1;DNA-directed RNA polymerase	POLR1A
26.3997	26.4759	24.8229	25.9076	26.2049	25.4752			0.0212846	1	0.0369473	0.0638247	0	O95716	O95716	Ras-related protein Rab-3D	RAB3D
28.2377	28.0538	27.3751	28.1458	27.7748	28.2222			0.207119	1	-0.158759	-0.535489	0	O95747;C9JIG9;F8WBK9	O95747;C9JIG9	Serine/threonine-protein kinase OSR1	OXSR1
27.6012	28.3324	26.9502	27.579	27.5446	27.5426			0.0631178	1	0.0725314	0.181592	0	O95757;E9PDE8;D6RJ96	O95757;E9PDE8;D6RJ96	Heat shock 70 kDa protein 4L	HSPA4L
28.9196	29.3038	26.5816	29.2122	28.9415	28.7513			0.33548	1	-0.699992	-0.812936	0	O95758;X6R242	O95758	Polypyrimidine tract-binding protein 3	PTBP3
27.1233	27.4302	25.0007	27.973	27.9872	27.3714			0.72966	0.553517	-1.2591	-1.59312	0	O95760	O95760	Interleukin-33;Interleukin-33 (95-270);Interleukin-33 (99-270);Interleukin-33 (109-270)	IL33
29.3149	29.5825	28.2123	29.3593	29.2864	29.5515			0.353143	1	-0.362464	-0.849489	0	O95782;M0R2D9;E9PPZ3;E9PS94	O95782	AP-2 complex subunit alpha-1	AP2A1
28.4304	28.9182	26.9013	28.4045	28.0958	28.4126			0.131865	1	-0.220957	-0.358436	0	O95793;Q5JW30;Q5JW28;F6UDC6	O95793;Q5JW30	Double-stranded RNA-binding protein Staufen homolog 1	STAU1
27.4432	27.8367	25.2045	28.0183	28.6947	28.0129			0.765153	0.50574	-1.41384	-1.66258	0	O95816	O95816	BAG family molecular chaperone regulator 2	BAG2
26.1329	27.0574	26.4664	27.0754	27.3453	26.8192			0.785217	0.492934	-0.527737	-1.70196	0	O95834;K7EIK7;A0A0C4DGQ7;C9JRL6;K7EII6;K7EKG3;K7ELB2;K7EIM1;K7ELI8;K7EQR0;K7ERY9;K7EKU5	O95834;K7EIK7;A0A0C4DGQ7;C9JRL6	Echinoderm microtubule-associated protein-like 2	EML2
28.9104	29.4267	28.8016	29.0148	29.3052	29.2261			0.255232	1	-0.135792	-0.642357	0	O95861;A6NF51;F8VVW8;F8VZG4;F8W1J0;F8VRY7	O95861;A6NF51	3(2),5-bisphosphate nucleotidase 1	BPNT1
29.5125	29.8144	27.6251	29.1304	29.0149	29.5669			0.132205	1	-0.253401	-0.35927	0	O95881;V9GY50;V9GYV4	O95881	Thioredoxin domain-containing protein 12	TXNDC12
32.4293	32.7609	30.0394	32.0361	32.3508	32.4303			0.241055	1	-0.52917	-0.611285	0	O95994;B5MC07;C9J3E2;H7C3Z9;H7C040;B5MC62	O95994;B5MC07;C9J3E2	Anterior gradient protein 2 homolog	AGR2
28.0735	28.8592	25.2463	27.6629	27.899	28.2386			0.185967	1	-0.540524	-0.487097	0	O96000;H3BV16;H3BPJ9	O96000;H3BV16;H3BPJ9	NADH dehydrogenase [ubiquinone] 1 beta subcomplex subunit 10	NDUFB10
28.3838	27.8231	27.4701	28.4241	28.8481	28.9125			1.27719	0.201254	-0.835911	-2.72304	0	O96008;K7EJ57;K7EKG4	O96008;K7EJ57;K7EKG4	Mitochondrial import receptor subunit TOM40 homolog	TOMM40
28.6428	29.5454	28.4279	28.8893	29.1641	28.5857			0.0066282	1	-0.00769297	-0.0201965	0	O96019;H7C5S0;C9JQT2;O94805	O96019;H7C5S0	Actin-like protein 6A	ACTL6A
27.7915	27.8133	27.7463	28.1112	28.2327	28.2659	+	3ha_huvec	2.92454	0.0112727	-0.419525	-8.22758	0	P00167;J3KNC7	P00167	Cytochrome b5	CYB5A
28.7496	28.8306	28.0736	30.0666	30.2505	30.0895	+	3ha_huvec	2.51863	0.0151304	-1.58429	-6.41789	0	P00326;A0A087WU81;P07327;A0A087WUC4	P00326;A0A087WU81	Alcohol dehydrogenase 1C	ADH1C
32.1818	32.4014	30.9019	32.224	32.3393	32.3449			0.432732	1	-0.474369	-1.011	0	P00338;F5GXY2;F5GYU2;F5GXH2;F5H5J4;F5H6W8;F5GWW2;F5GXC7;F5H8H6;F5GXU1;P07864;Q6ZMR3;F5H5G7;F5H155;A0A087WUM2;G3XAP5;F5H245	P00338;F5GXY2;F5GYU2	L-lactate dehydrogenase A chain	LDHA
31.2237	31.9266	29.5248	31.4591	31.6101	31.4179			0.350681	1	-0.604004	-0.844411	0	P00352;Q5SYQ9;Q5SYQ8;Q5SYQ7;H0Y2X5;H0YMG7;P47895;O94788	P00352	Retinal dehydrogenase 1	ALDH1A1
30.4009	30.6302	29.3953	30.3645	30.6914	30.6314			0.462996	0.996868	-0.420291	-1.07134	0	P00367;A0A804HJD7;A0A804HKE0;P49448;A0A804HJZ0;A0A804HHS2;A0A804HHU3;A0A804HLC0;A0A804HIA0	P00367;A0A804HJD7;A0A804HKE0;P49448	Glutamate dehydrogenase 1, mitochondrial;Glutamate dehydrogenase 2, mitochondrial	GLUD1;GLUD2
28.6974	29.1261	27.7953	28.7495	28.2906	28.3675			0.0584018	1	0.0703856	0.168761	0	P00374;B4DM58;C9JJ68;Q86XF0	P00374;B4DM58	Dihydrofolate reductase	DHFR
28.5169	29.4297	27.5545	29.2599	29.1117	28.6781			0.381443	1	-0.516188	-0.907465	0	P00387;B1AHF3	P00387	NADH-cytochrome b5 reductase 3;NADH-cytochrome b5 reductase 3 membrane-bound form;NADH-cytochrome b5 reductase 3 soluble form	CYB5R3
31.1112	31.4985	29.773	31.195	31.3458	31.2174			0.364881	1	-0.458475	-0.873619	0	P00390;A0A2R8YF59;H0YC68	P00390	Glutathione reductase, mitochondrial	GSR
29.7555	25.9943	25.2731	30.0969	29.9473	29.7227			0.980011	0.332025	-2.9146	-2.09102	0	P00403	P00403	Cytochrome c oxidase subunit 2	MT-CO2
32.4881	33.0605	31.5351	32.4959	32.6907	32.7939			0.263068	1	-0.298957	-0.659394	0	P00441;H7BYH4	P00441;H7BYH4	Superoxide dismutase [Cu-Zn]	SOD1
30.2152	30.8955	29.4246	30.428	30.3945	30.4991			0.242788	1	-0.262104	-0.615101	0	P00491;G3V5M2;G3V2H3;G3V393	P00491;G3V5M2	Purine nucleoside phosphorylase	PNP
28.8389	28.9673	27.4906	28.9063	28.9046	29.496			0.584196	0.826928	-0.670057	-1.30956	0	P00492	P00492	Hypoxanthine-guanine phosphoribosyltransferase	HPRT1
30.3649	30.7985	29.9027	30.686	30.8	30.6646			0.620168	0.761727	-0.361513	-1.37969	0	P00505	P00505	Aspartate aminotransferase, mitochondrial	GOT2
26.0045	26.5943	26.0512	26.2319	26.448	25.8356			0.0595907	1	0.0448494	0.172006	0	P00533;Q504U8;E9PFD7;C9JYS6;J3KTI5;H3BLT0;A0A0A0MSE1;Q15303	P00533;Q504U8;E9PFD7	Epidermal growth factor receptor;Receptor protein-tyrosine kinase	EGFR
32.7321	33.1486	31.147	32.8426	33.0941	32.9			0.417935	1	-0.603003	-0.981307	0	P00558;P07205	P00558	Phosphoglycerate kinase 1	PGK1
28.9035	29.147	28.1666	29.187	28.7732	28.9772			0.30781	1	-0.240105	-0.755022	0	Q5T9B7;P00568;H0YID2;Q9Y6K8	Q5T9B7;P00568	Adenylate kinase isoenzyme 1	AK1
30.8053	31.005	30.2016	30.8712	30.764	30.6534			0.136352	1	-0.0921885	-0.36941	0	P00966;Q5T6L6;Q5T6L5	P00966;Q5T6L6	Argininosuccinate synthase	ASS1
29.9191	30.2786	28.8907	30.3001	30.241	30.3196			0.639932	0.732336	-0.59076	-1.41818	0	P02786;G3V0E5;F8WBE5;H7C3V5	P02786;G3V0E5	Transferrin receptor protein 1;Transferrin receptor protein 1, serum form	TFRC
29.1971	29.7308	27.9159	29.7725	29.7388	29.7182			0.669661	0.676562	-0.795238	-1.47608	0	P04040	P04040	Catalase	CAT
26.7566	27.5324	25.5015	27.2537	27.2994	27.2381			0.490885	0.959685	-0.66689	-1.12657	0	P04066	P04066	Tissue alpha-L-fucosidase	FUCA1
32.7917	32.8666	31.3849	32.9956	32.8651	32.9227			0.528176	0.920508	-0.580041	-1.19997	0	P04075;H3BQN4;J3KPS3;H3BPS8;H3BUH7;H3BR04;H3BMQ8;H3BU78;H3BR68	P04075;H3BQN4;J3KPS3;H3BPS8;H3BUH7;H3BR04	Fructose-bisphosphate aldolase A;Fructose-bisphosphate aldolase	ALDOA
31.6055	31.3305	31.7675	31.9788	31.9161	31.8235			1.17585	0.243867	-0.338342	-2.50088	0	P04080;A0A1W2PS52;A0A1W2PQG6	P04080;A0A1W2PS52	Cystatin-B	CSTB
30.0956	30.4677	29.8335	29.5746	29.6134	29.684			1.27652	0.200824	0.508273	2.72154	0	P04083;Q5T3N1;Q5T3N0	P04083;Q5T3N1	Annexin A1;Annexin	ANXA1
25.9806	27.2714	26.6116	27.219	27.8157	28.1061			1.129	0.253838	-1.0924	-2.40068	0	P04114	P04114	Apolipoprotein B-100;Apolipoprotein B-48	APOB
31.4901	31.6821	30.5184	31.6815	31.7504	31.7562			0.621732	0.763615	-0.499146	-1.38273	0	P04181	P04181	Ornithine aminotransferase, mitochondrial;Ornithine aminotransferase, hepatic form;Ornithine aminotransferase, renal form	OAT
34.3852	34.696	33.6113	34.5933	34.6169	34.7806			0.589547	0.814552	-0.43276	-1.32	0	P04406;E7EUT5;O14556	P04406;E7EUT5	Glyceraldehyde-3-phosphate dehydrogenase	GAPDH
27.0901	27.2281	24.9886	27.7876	27.3263	27.6382			0.711546	0.584691	-1.1484	-1.55774	0	P04424;A0A5F9ZHM8;F8W943;A0A5F9ZHC6;H7C0S8	P04424;A0A5F9ZHM8;F8W943;A0A5F9ZHC6	Argininosuccinate lyase	ASL
30.0842	30.5902	28.4815	30.5417	30.9352	30.9128			0.765222	0.506297	-1.07787	-1.66272	0	P04792;A0A6Q8PFK8;A0A6Q8PGK1;A0A6Q8PHJ6;A0A6Q8PFE7;A0A6Q8PF43;A0A6Q8PHA6;A0A6Q8PH65;A0A6Q8PGY2;C9J3N8	P04792;A0A6Q8PFK8;A0A6Q8PGK1;A0A6Q8PHJ6	Heat shock protein beta-1	HSPB1
28.8051	28.9867	27.1689	29.3578	29.3101	29.2961			0.799957	0.475531	-1.0011	-1.73096	0	P04843;B7Z4L4;F8WF32	P04843;B7Z4L4	Dolichyl-diphosphooligosaccharide--protein glycosyltransferase subunit 1	RPN1
28.6059	29.0705	28.1999	29.2144	29.3713	28.9984			0.974356	0.332088	-0.569281	-2.0795	0	P04844;Q5JYR7;Q5JYR4;F2Z3K5;Q5JYR3;H0Y5M1	P04844;Q5JYR7	Dolichyl-diphosphooligosaccharide--protein glycosyltransferase subunit 2	RPN2
27.5538	27.9691	27.4882	27.9989	28.0329	28.0487			1.10833	0.267557	-0.356492	-2.35692	0	P04899;P63096;P09471;A0A3B3ITM0;A0A6Q8PGR1;A0A1W2PP38;H3BTM2;A0A1W2PQK2;A0A3B3IUA8;A0A087WZE5;A0A1W2PRE1;A0A1W2PS82;A0A087WTB6;A2A2R6;P11488;A8MTJ3;P19087;A0A1W2PRJ7	P04899	Guanine nucleotide-binding protein G(i) subunit alpha-2	GNAI2
25.7571	26.7873	25.4125	25.2481	25.9616	26.7489			0.000296193	0.999739	-0.00054423	-0.000909036	0	P04920;A0A7I2V5T6;C9J459;C9JVC2;C9J722;C9J035;C9J9M9	P04920;A0A7I2V5T6	Anion exchange protein 2	SLC4A2
30.3607	30.1203	29.5936	30.7058	30.7608	30.736			1.45107	0.142848	-0.709365	-3.12386	0	P05023;M0R116;A0A2R8YEY8;A0A0A0MT26;P13637;B1AKY9;P50993;H0Y7C1;Q13733;Q5TC01;P20648;Q5TC02;Q5TC05;M0QXF2;E9PRA5;A0A669K9X0	P05023	Sodium/potassium-transporting ATPase subunit alpha-1	ATP1A1
30.2665	30.9093	29.7465	30.4362	30.9712	30.8529			0.525305	0.926073	-0.445978	-1.19433	0	P05026;V9GYR2	P05026;V9GYR2	Sodium/potassium-transporting ATPase subunit beta-1	ATP1B1
29.5309	30.1332	28.4809	29.5697	29.5847	29.8589			0.230753	1	-0.289459	-0.588498	0	P05091;F8VP50;S4R3S4	P05091	Aldehyde dehydrogenase, mitochondrial	ALDH2
30.3505	31.1207	31.7412	30.7109	31.4328	31.0537			0.00360485	1	0.00499344	0.0110218	0	P05141;Q9H0C2	P05141	ADP/ATP translocase 2;ADP/ATP translocase 2, N-terminally processed	SLC25A5
25.7976	26.0977	24.7937	27.0828	27.6342	27.0123			1.7239	0.128865	-1.68008	-3.81343	0	P05165;A0A1B0GU58;A0A1B0GUX9;A0A1B0GWA1;A0A1B0GWI4;H0Y5U0;Q5JTW6;A0A1B0GTR1	P05165;A0A1B0GU58;A0A1B0GUX9	Propionyl-CoA carboxylase alpha chain, mitochondrial	PCCA
29.8434	30.2904	29.722	29.9549	30.1455	30.2226			0.338168	1	-0.155739	-0.818517	0	P05198;G3V4T5;H0YJS4	P05198;G3V4T5;H0YJS4	Eukaryotic translation initiation factor 2 subunit 1	EIF2S1
28.114	28.8968	28.054	28.3295	28.2886	28.7293			0.111655	1	-0.0942313	-0.308225	0	P05362;K7EKL8;E7ESS4	P05362	Intercellular adhesion molecule 1	ICAM1
31.8662	32.4518	28.8372	32.1867	31.901	31.7577			0.327137	1	-0.896737	-0.795561	0	P05386	P05386	60S acidic ribosomal protein P1	RPLP1
32.5217	33.1762	30.9822	32.9298	32.7805	32.3644			0.278117	1	-0.464895	-0.691861	0	P05387;H0YDD8	P05387	60S acidic ribosomal protein P2	RPLP2
32.1635	32.4517	31.3559	32.281	32.2602	32.3862			0.409924	1	-0.318782	-0.965176	0	P05388;F8VWS0;F8VU65;F8VW21;F8VPE8;G3V210;F8VQY6;F8VRK7;F8VZS0;Q8NHW5;F8VWV4;F8VS58;F8W1K8	P05388;F8VWS0;F8VU65;F8VW21;F8VPE8;G3V210;F8VQY6;F8VRK7;F8VZS0;Q8NHW5	60S acidic ribosomal protein P0;60S acidic ribosomal protein P0-like	RPLP0;RPLP0P6
29.4731	29.73	28.1625	29.5362	29.7164	29.599			0.434457	1	-0.495323	-1.01445	0	P05455;E7ERC4;E9PGX9;E9PFL9	P05455	Lupus La protein	SSB
33.1966	33.6472	32.0345	33.2788	33.6386	33.6368			0.491782	0.964344	-0.558614	-1.12834	0	P05783;F8VZY9;CON__H-INV:HIT000015463;CON__Q92764;C4AM86;CON__Q497I4;Q92764	P05783;F8VZY9	Keratin, type I cytoskeletal 18	KRT18
29.1127	28.083	24.8781	29.3998	29.3314	29.8781			0.780751	0.492522	-2.17849	-1.69319	0	P05976;P08590	P05976;P08590	Myosin light chain 1/3, skeletal muscle isoform;Myosin light chain 3	MYL1;MYL3
25.9932	25.9476	25.116	25.522	26.0028	26.1934			0.251079	1	-0.220477	-0.633288	0	P06280;A0A6Q8PHD1;A0A6Q8PGG0;A0A6Q8PFA9;A0A3B3IUC4;A0A6Q8PHM8;V9GYN5;A0A669KAY7;A0A669KB83;A0A3B3IRU3	P06280;A0A6Q8PHD1;A0A6Q8PGG0;A0A6Q8PFA9;A0A3B3IUC4;A0A6Q8PHM8	Alpha-galactosidase A	GLA
32.2361	32.7464	31.2864	32.4005	32.2058	32.2258			0.163407	1	-0.187741	-0.434369	0	P06576;H0YH81;F8W079	P06576;H0YH81;F8W079	ATP synthase subunit beta, mitochondrial;ATP synthase subunit beta	ATP5B
33.8776	32.862	33.6432	33.9701	34.5608	34.6677			1.17405	0.241615	-0.938588	-2.497	0	P06703;R4GN98	P06703;R4GN98	Protein S100-A6;Protein S100	S100A6
28.651	29.054	28.4067	28.7224	28.7769	28.9447			0.214921	1	-0.110753	-0.553105	0	P06730;D6RBW1;H0Y8J7;D6RFJ3	P06730;D6RBW1;H0Y8J7	Eukaryotic translation initiation factor 4E	EIF4E
33.5506	34.0854	33.0236	33.8007	33.9556	33.8355			0.428302	1	-0.31072	-1.00212	0	P06733;A0A2R8Y6G6;K7EM90;A0A2R8YEM5;A0A2R8Y879;K7ERS8;A0A2R8Y6I8;A0A2R8Y798;A0A2R8YEG5;E5RI09;E5RG95;K7EPM1;K7EKN2;E5RGZ4	P06733;A0A2R8Y6G6	Alpha-enolase	ENO1
27.5508	28.1259	26.1909	27.8613	27.9743	27.6995			0.407177	1	-0.555838	-0.959634	0	P06737;E9PK47	P06737;E9PK47	Glycogen phosphorylase, liver form;Alpha-1,4 glucan phosphorylase	PYGL
27.1791	27.9325	24.6328	27.096	26.9617	27.1436			0.185356	1	-0.48559	-0.485685	0	P06756;H7BZG1	P06756	Integrin alpha-V;Integrin alpha-V heavy chain;Integrin alpha-V light chain	ITGAV
29.2436	29.8985	27.7718	29.8592	29.9254	29.8249			0.644615	0.729073	-0.898539	-1.4273	0	P07099;B1AQP8	P07099	Epoxide hydrolase 1	EPHX1
30.7095	30.7096	30.2348	31.5409	31.0402	31.5994			1.62034	0.132989	-0.842218	-3.54203	0	P07108;A0A0A0MTI5;B8ZWD1	P07108;A0A0A0MTI5;B8ZWD1	Acyl-CoA-binding protein	DBI
27.185	27.3166	25.8576	27.2763	26.759	26.9731			0.166696	1	-0.216435	-0.442134	0	P07203;A0A2R8Y6B6;A0A7I2YMD7;A0A7I2UQ36	P07203;A0A2R8Y6B6	Glutathione peroxidase 1	GPX1
32.0106	32.1319	31.9247	31.999	32.1207	32.0813			0.252572	1	-0.0445506	-0.636552	0	P07355;H0YMW4;H0YN42;H0YMU9;H0YMD0;A6NMY6;H0YM50;H0YNB8;H0YKS4;H0YL33;H0YNP5;A0A7I2V4P4;H0YN28;H0YMM1;H0YKX9;H0YMT9;H0YLV6;H0YKZ7;H0YKL9;H0YNA0;H0YKV8;H0YMD9;H0YKN4;H0YLE2	P07355;H0YMW4;H0YN42;H0YMU9;H0YMD0;A6NMY6;H0YM50;H0YNB8;H0YKS4;H0YL33;H0YNP5	Annexin A2;Annexin;Putative annexin A2-like protein	ANXA2;ANXA2P2
30.8419	31.364	29.6318	30.9613	31.0031	30.693			0.201788	1	-0.273275	-0.523381	0	P07384;E9PRM1;E9PJJ3;E9PLC9;E9PMC6;E9PJA6;E9PSA6;E9PQB3;E9PLX0;E9PL37;E9PIA9	P07384	Calpain-1 catalytic subunit	CAPN1
32.4699	33.8017	30.8851	33.6065	33.2586	33.4365			0.545936	0.899563	-1.0483	-1.23478	0	Q5JP53;P07437;Q5ST81;A6NNZ2;CON__ENSEMBL:ENSBTAP00000025008;Q9H4B7;M0R1I1;G3V5W4;G3V2R8;G3V3R4;G3V2N6	Q5JP53;P07437;Q5ST81	Tubulin beta chain	TUBB
30.101	29.79	30.1652	30.7863	30.5362	30.4012			1.57915	0.129981	-0.555842	-3.4375	0	P07602;C9JIZ6;Q5BJH1;A0A0J9YXB8	P07602;C9JIZ6;Q5BJH1	Prosaposin;Saposin-A;Saposin-B-Val;Saposin-B;Saposin-C;Saposin-D	PSAP
30.4393	30.7712	28.9278	30.31	30.3827	30.325			0.19867	1	-0.293114	-0.516272	0	P07686;Q5URX0;H0YA83;H0Y9B6;D6REQ8	P07686;Q5URX0;H0YA83	Beta-hexosaminidase subunit beta;Beta-hexosaminidase subunit beta chain B;Beta-hexosaminidase subunit beta chain A	HEXB
33.8755	33.8227	32.7929	33.6213	33.9674	33.6751			0.281563	1	-0.257631	-0.699249	0	P07737;K7EJ44;I3L3D5	P07737;K7EJ44	Profilin-1	PFN1
30.5861	30.2592	28.6921	30.154	30.0028	30.2339			0.184327	1	-0.284398	-0.483305	0	P07741;H3BQB1;H3BQF1;H3BQZ9;H3BSW3	P07741;H3BQB1;H3BQF1;H3BQZ9	Adenine phosphoribosyltransferase	APRT
30.5133	30.917	29.4727	30.7144	30.7774	30.6995			0.425539	1	-0.429426	-0.996582	0	P07814;V9GYZ6;V9GZ76	P07814;V9GYZ6	Bifunctional glutamate/proline--tRNA ligase;Glutamate--tRNA ligase;Proline--tRNA ligase	EPRS
32.7735	32.9225	31.9179	32.8814	32.9067	33.0475			0.570952	0.849359	-0.407217	-1.2837	0	P07900;G3V2J8;Q58FG0;Q14568	P07900	Heat shock protein HSP 90-alpha	HSP90AA1
29.5165	30.5254	28.9826	29.1774	29.4986	29.7487			0.155333	1	0.199967	0.415191	0	P07919;A0A096LP55	P07919	Cytochrome b-c1 complex subunit 6, mitochondrial	UQCRH
29.8411	30.6061	28.9762	30.0943	29.951	30.106			0.19704	1	-0.242659	-0.512547	0	P07954;A0A804HI24;A0A804HKE6	P07954;A0A804HI24	Fumarate hydratase, mitochondrial	FH
27.6734	28.114	27.3308	27.7403	27.6167	27.7745			0.00626332	1	-0.00442314	-0.0190926	0	P08133;E5RK69;E7EMC6;E5RK63;E5RJF5;E5RFF0;E5RI05;E5RJR0;E5RIU8;H0YC77	P08133;E5RK69;E7EMC6	Annexin A6;Annexin	ANXA6
27.3898	27.4534	26.0403	27.6355	27.3991	27.403			0.481681	0.969394	-0.518024	-1.10838	0	P08183;P21439;H7C0M2	P08183	Multidrug resistance protein 1	ABCB1
34.007	33.8851	33.8035	34.191	34.352	34.3661			2.11336	0.0521818	-0.404523	-4.96064	0	P08238;Q58FF7	P08238	Heat shock protein HSP 90-beta	HSP90AB1
26.0571	26.5402	25.3353	26.6291	26.5555	26.6033			0.816336	0.453869	-0.618474	-1.76324	0	P08240	P08240	Signal recognition particle receptor subunit alpha	SRPR
30.1357	30.6013	28.3778	29.8044	29.7658	29.6646			0.0196388	1	-0.0400149	-0.058993	0	P08243;F8WEJ5;C9J057;C9JT45;C9JM09;C9JLN6	P08243;F8WEJ5	Asparagine synthetase [glutamine-hydrolyzing]	ASNS
30.0164	30.6167	27.9162	29.8013	30.0487	29.6707			0.145658	1	-0.323833	-0.391984	0	P08559;Q5JPU3;Q5JPU0;Q5JPT9;Q5JPU1;Q5JPU2;P29803	P08559	Pyruvate dehydrogenase E1 component subunit alpha, somatic form, mitochondrial	PDHA1
28.2694	28.9807	27.8498	28.2576	28.2308	28.6103			0.000359031	1	0.000387828	0.00110181	0	P08574	P08574	Cytochrome c1, heme protein, mitochondrial	CYC1
29.5743	29.4528	28.501	29.5735	29.6696	29.7598			0.646459	0.725973	-0.4916	-1.43089	0	P08621;M0QYR1;M0QX04	P08621;M0QYR1	U1 small nuclear ribonucleoprotein 70 kDa	SNRNP70
28.0317	28.0905	27.4226	27.7756	28.2525	26.4711			0.23942	1	0.34858	0.607681	0	P08754	P08754	Guanine nucleotide-binding protein G(k) subunit alpha	GNAI3
30.0003	30.484	28.5983	29.4154	29.4693	29.5109			0.150894	1	0.229052	0.404576	0	P08758;D6RBL5;D6RBE9;E9PHT9;D6RCN3	P08758;D6RBL5;D6RBE9;E9PHT9	Annexin A5;Annexin	ANXA5
28.5712	28.7213	28.5583	29.3441	29.2331	29.1647	+	3ha_huvec	2.98282	0.0124	-0.630377	-8.52175	0	P09012;M0R268;M0QZG7;M0R221;M0R2B8;M0R0G9;M0QXK2	P09012;M0R268;M0QZG7	U1 small nuclear ribonucleoprotein A	SNRPA
28.9521	29.7279	25.2567	28.8659	28.7823	29.4856			0.311502	1	-1.06571	-0.762798	0	P09104;F5H0C8;F5H1C3;U3KQP4	P09104;F5H0C8	Gamma-enolase;Enolase	ENO2
29.1071	29.571	28.1462	29.4471	29.4393	29.1607			0.401416	1	-0.407649	-0.947998	0	P09110;C9JDE9;H7C131;H0Y4D4;B4DVF4;F2Z2Q6;F2Z3P7	P09110;C9JDE9;H7C131;H0Y4D4	3-ketoacyl-CoA thiolase, peroxisomal	ACAA1
32.9836	33.6563	31.9614	32.9654	33.023	33.2213			0.151748	1	-0.20282	-0.406621	0	P09211;A8MX94;A0A087X2E9;A0A2R8Y5E5;A0A087X243	P09211;A8MX94	Glutathione S-transferase P	GSTP1
31.3553	31.5237	30.7209	31.7471	31.8419	31.8417			1.1644	0.244627	-0.610271	-2.47626	0	P09327;C9J2B5;O75366	P09327	Villin-1	VIL1
28.8118	28.3604	27.04	28.9303	28.2981	28.1764			0.274732	1	-0.397521	-0.684586	0	P09417;B7Z415;D6RGG7;H0Y8F7;D6RHJ7	P09417;B7Z415;D6RGG7	Dihydropteridine reductase	QDPR
32.0752	31.7931	32.0896	32.647	32.5976	32.6979	+	3ha_huvec	2.55521	0.0114545	-0.661541	-6.56527	0	P09429;Q5T7C4;B2RPK0	P09429;Q5T7C4	High mobility group protein B1	HMGB1
27.3221	27.7285	26.1293	27.2043	28.4133	27.9643			0.601984	0.78822	-0.800687	-1.34425	0	P09467;A0A3B3IUC7;A0A804HJK9;Q5VZC3	P09467;A0A3B3IUC7	Fructose-1,6-bisphosphatase 1	FBP1
28.0756	27.4968	24.5132	28.3843	28.293	28.7646			0.735214	0.550841	-1.78544	-1.60397	0	P09496;F8WF69;C9J8P9	P09496;F8WF69	Clathrin light chain A	CLTA
27.5254	27.138	26.0986	28.1428	27.952	28.0888			1.24609	0.214298	-1.14054	-2.65403	0	P09497;D6RJD1	P09497;D6RJD1	Clathrin light chain B	CLTB
29.7193	29.8568	29.196	30.3492	30.2573	29.9502			1.19151	0.246693	-0.59485	-2.53471	0	P09525;Q6P452;B4E1S2	P09525;Q6P452	Annexin A4;Annexin	ANXA4
26.5499	27.064	24.0719	27.0788	27.6034	27.6658			0.758368	0.509709	-1.55407	-1.64929	0	P09543;K7ERC4;K7EN66;C9K0L8;K7ERZ0	P09543	2,3-cyclic-nucleotide 3-phosphodiesterase	CNP
30.3583	30.4575	29.3365	30.0963	30.3252	30.3792			0.229807	1	-0.216146	-0.586395	0	P09622;E9PEX6;F8WDM5;A0A1W2PR83;F2Z2E3	P09622;E9PEX6	Dihydrolipoyl dehydrogenase, mitochondrial;Dihydrolipoyl dehydrogenase	DLD
28.2566	29.264	27.8663	28.5447	28.8098	28.4708			0.124654	1	-0.146118	-0.340671	0	P09661;H0YMA0;H0YLR3;H0YKK0	P09661;H0YMA0;H0YLR3;H0YKK0	U2 small nuclear ribonucleoprotein A	SNRPA1
28.8513	26.8902	24.3584	29.1734	28.3526	28.3059			0.649035	0.721557	-1.9107	-1.43591	0	P09669	P09669	Cytochrome c oxidase subunit 6C	COX6C
29.0637	29.4741	28.163	29.5194	29.4796	29.2755			0.594502	0.803801	-0.524544	-1.32966	0	P09874;A0A7I2V3E1;A0A7I2V625;A0A7I2V5E9;A0A7I2V384	P09874;A0A7I2V3E1	Poly [ADP-ribose] polymerase 1	PARP1
30.0328	30.7697	29.2369	30.4013	30.4409	30.3903			0.376864	1	-0.397724	-0.898132	0	P09960;B4DEH5	P09960	Leukotriene A-4 hydrolase	LTA4H
29.335	29.7957	28.1971	29.3613	29.4016	29.5941			0.288492	1	-0.343087	-0.714059	0	P09972;A8MVZ9;J3KSV6;J3QKP5;C9J8F3;K7EKH5;J3QKK1	P09972;A8MVZ9	Fructose-bisphosphate aldolase C;Fructose-bisphosphate aldolase	ALDOC
33.9852	33.0796	33.3627	34.1513	34.0858	33.8935			0.954421	0.356073	-0.567749	-2.03904	0	Q71UI9;P0C0S5;C9J0D1;A0A494C189;C9J386	Q71UI9;P0C0S5;C9J0D1;A0A494C189;C9J386	Histone H2A.V;Histone H2A.Z;Histone H2A	H2AFV;H2AFZ
32.4505	32.4899	32.1271	32.852	32.6028	32.6574			1.1899	0.244856	-0.348239	-2.53122	0	P0DP25;P0DP24;P0DP23;E7EMB3;Q96HY3;G3V361;A0A590UJI2;A0A590UJC0;G3V226;M0QZ52;F8WBR5;G3V479;P27482;C9J7T9;P02585	P0DP25;P0DP24;P0DP23;E7EMB3;Q96HY3;G3V361;A0A590UJI2		CALM2;CALM1
28.7761	28.8705	26.8053	28.3769	28.4172	28.3138			0.118139	1	-0.21867	-0.324478	0	P10155;G5E9R9;D6RDN1;D6RE09;H0Y9N5	P10155	60 kDa SS-A/Ro ribonucleoprotein	TROVE2
28.9501	29.4215	26.8629	29.0669	29.1873	29.2258			0.402579	1	-0.748521	-0.950348	0	P10253;I3L0S5;I3L3L3;I3L2V9	P10253	Lysosomal alpha-glucosidase;76 kDa lysosomal alpha-glucosidase;70 kDa lysosomal alpha-glucosidase	GAA
31.771	32.5124	31.6432	32.3296	32.3682	31.9517			0.328582	1	-0.241002	-0.798575	0	P10599	P10599	Thioredoxin	TXN
29.8679	30.0072	29.9338	29.9632	30.1676	30.2515			0.945293	0.359375	-0.191107	-2.02057	0	P10606	P10606	Cytochrome c oxidase subunit 5B, mitochondrial	COX5B
27.713	28.2679	27.4914	27.9335	28.0532	27.6247			0.0609624	1	-0.0463683	-0.175741	0	P10644;K7EPB2;K7EMU2;K7EMZ6;K7EIE5;K7EID3;K7EJ40;K7EK41;K7EPR5;K7EQK3;X6RAV4;K7EM13	P10644;K7EPB2;K7EMU2;K7EMZ6;K7EIE5;K7EID3;K7EJ40;K7EK41	cAMP-dependent protein kinase type I-alpha regulatory subunit;cAMP-dependent protein kinase type I-alpha regulatory subunit, N-terminally processed	PRKAR1A
30.9448	30.8394	30.4676	30.6287	30.5492	31.0163			0.0316947	1	0.0192134	0.0940131	0	P10768;X6RA14;U3KQT1;H7BZT7	P10768;X6RA14;U3KQT1;H7BZT7	S-formylglutathione hydrolase	ESD
32.7706	33.2487	32.0207	33.0623	33.1433	32.92			0.425255	1	-0.361844	-0.996012	0	P10809;A0A7I2V599;A0A7I2V2X6;A0A7I2YQK6;A0A7I2V5M1;A0A7I2V5K3;A0A7I2YQ71;A0A7I2V369;E7EXB4;E7ESH4;C9JL25;C9JL19;C9JCQ4;C9J0S9	P10809;A0A7I2V599;A0A7I2V2X6;A0A7I2YQK6	60 kDa heat shock protein, mitochondrial	HSPD1
32.1673	32.4367	31.2458	32.599	32.4088	32.6735			0.76085	0.50932	-0.610505	-1.65415	0	P11021;A0A7P0TB36;A0A7P0TAI0	P11021;A0A7P0TB36;A0A7P0TAI0	78 kDa glucose-regulated protein	HSPA5
33.8483	34.3601	33.3556	34.2334	34.1962	34.2139			0.548621	0.899392	-0.359856	-1.24004	0	P11142;E9PKE3;E9PNE6;E9PLF4;E9PQQ4;E9PQK7;E9PK54;P54652;E9PPY6;E9PN25;E9PI65	P11142;E9PKE3;E9PNE6	Heat shock cognate 71 kDa protein	HSPA8
25.6235	26.3247	25.805	26.9325	27.143	27.2103	+	3ha_huvec	2.18782	0.0431579	-1.17751	-5.20607	0	P11166;A0A6Q8PFI8	P11166;A0A6Q8PFI8	Solute carrier family 2, facilitated glucose transporter member 1	SLC2A1
28.8766	29.4256	24.6121	28.2942	28.5794	28.046			0.164586	1	-0.668439	-0.437154	0	P11172;E9PFD2;F2Z3P2;F2Z303;F8WDG4	P11172;E9PFD2	Uridine 5-monophosphate synthase;Orotate phosphoribosyltransferase;Orotidine 5-phosphate decarboxylase	UMPS
29.1107	29.7335	29.0571	29.3068	29.3285	29.346			0.0418132	1	-0.0266876	-0.122769	0	P11177;C9J634;F8WF02	P11177;C9J634;F8WF02	Pyruvate dehydrogenase E1 component subunit beta, mitochondrial	PDHB
29.2527	29.3939	28.4538	29.4777	29.4085	29.4163			0.612858	0.769415	-0.400764	-1.36544	0	P11216;H0Y4Z6;P11217	P11216	Glycogen phosphorylase, brain form	PYGB
28.0099	28.76	26.7626	25.5979	25.858	27.415			0.890718	0.393138	1.55385	1.9109	0	P11233;H7C3P7;C9JPE8;F8WEQ6;C9JYR1	P11233;H7C3P7	Ras-related protein Ral-A	RALA
25.8647	25.7822	25.0413	25.9759	25.4439	25.4383			0.0620589	1	-0.0566076	-0.17872	0	P11234;C9J6B1;C9JQB3	P11234;C9J6B1;C9JQB3	Ras-related protein Ral-B	RALB
25.9536	26.3136	25.4684	28.9663	29.2083	29.0958	+	3ha_huvec	3.62501	0.031	-3.17827	-12.4795	0	P11279	P11279	Lysosome-associated membrane glycoprotein 1	LAMP1
29.2498	29.8003	28.7106	29.6126	29.5788	29.1917			0.238718	1	-0.20749	-0.606133	0	P11310;Q5T4U5;F6YB23;A0A7P0TB51;A0A7P0T8G6;A0A7P0T932;A0A7P0TB55;A0A7P0TA63;A0A7P0T8J9;A0A7P0TBD1;A0A7P0TAB2;A0A7P0TA39;E9PJM9;H0YDT5;A0A7P0TB28;A0A7P0T9W7;E9PRX4	P11310;Q5T4U5;F6YB23;A0A7P0TB51;A0A7P0T8G6;A0A7P0T932;A0A7P0TB55	Medium-chain specific acyl-CoA dehydrogenase, mitochondrial	ACADM
30.6812	30.8442	30.0935	30.9616	31.1062	31.0645			1.02072	0.310509	-0.504479	-2.17438	0	P11413;E7EUI8;E7EM57;E9PD92	P11413;E7EUI8;E7EM57;E9PD92	Glucose-6-phosphate 1-dehydrogenase	G6PD
28.435	29.3596	26.3382	28.817	29.013	28.913			0.41305	1	-0.870054	-0.971475	0	P11498;A0A494C016;A0A494C101;E9PRE7;A0A494C0T2	P11498;A0A494C016	Pyruvate carboxylase, mitochondrial	PC
27.3572	28.1401	27.1709	27.2433	27.3685	26.7777			0.542481	0.897168	0.426233	1.22801	0	P11717;A0A7I2V381;A0A7I2YQS7;S4R328	P11717;A0A7I2V381	Cation-independent mannose-6-phosphate receptor	IGF2R
30.8853	31.8127	29.5309	30.9725	31.1774	31.1246			0.201984	1	-0.348548	-0.523827	0	P11766;H0YAG8;D6RFE4;D6R9G2;D6RAY0	P11766;H0YAG8	Alcohol dehydrogenase class-3	ADH5
29.6153	30.2013	29.464	29.9014	29.9555	29.8593			0.254537	1	-0.14518	-0.640841	0	P11908;H7C540;D3YTJ7;A6NMS2	P11908;H7C540	Ribose-phosphate pyrophosphokinase 2	PRPS2
30.5021	31.1926	29.7419	30.3759	30.4405	30.4629			0.0426074	1	0.0524712	0.125003	0	P12004	P12004	Proliferating cell nuclear antigen	PCNA
29.942	30.7481	29.3802	30.4431	30.828	30.7352			0.712971	0.582915	-0.645362	-1.56052	0	P12074	P12074	Cytochrome c oxidase subunit 6A1, mitochondrial	COX6A1
27.2024	27.7089	26.6203	27.4175	27.221	26.7928			0.0308744	1	0.0334161	0.091657	0	P12109;A0A087X0S5;A0A804HJ28	P12109	Collagen alpha-1(VI) chain	COL6A1
27.1744	27.137	26.6472	27.3084	27.4719	27.5192			1.1584	0.244255	-0.44697	-2.46339	0	P12235;V9GYG0	P12235;V9GYG0	ADP/ATP translocase 1	SLC25A4
31.9197	31.9775	30.5784	32.0163	31.8833	32.0999			0.477962	0.972154	-0.507973	-1.10102	0	P12236	P12236	ADP/ATP translocase 3;ADP/ATP translocase 3, N-terminally processed	SLC25A6
29.3016	29.7805	28.3338	29.1509	29.4871	29.4641			0.200688	1	-0.228724	-0.520876	0	P12270;Q5SWX9	P12270	Nucleoprotein TPR	TPR
30.6153	30.8326	30.2731	30.5498	30.6715	30.6237			0.0881422	1	-0.0413373	-0.248042	0	P12277;G3V4N7;H0YJG0;G3V461;G3V2I1;H0YJK0;P06732	P12277;G3V4N7	Creatine kinase B-type	CKB
29.9688	29.8009	30.0077	29.8904	29.9373	29.8089			0.25267	1	0.0469386	0.636766	0	P12429;D6RFG5;D6RCA8;D6RAZ8	P12429;D6RFG5	Annexin A3;Annexin	ANXA3
29.2596	28.7731	28.2958	29.6748	29.3867	29.4897			1.19788	0.24268	-0.740875	-2.54852	0	P12532;F8WCN3;C9JSQ1;C9JJX8;C9J995;C9J8F6;C9J6W7;C9JT96;P17540	P12532;F8WCN3;C9JSQ1	Creatine kinase U-type, mitochondrial	CKMT1A;CKMT1B
30.1162	30.7226	29.0538	30.3944	30.3088	30.3382			0.32168	1	-0.382938	-0.784157	0	P12814;A0A804HII9;A0A804HK61;A0A804HKE2;A0A804HIN7;A0A7I2V4Y4;A0A804HJU8;A0A804HLD0;A0A804HLF4;G3V2N5;A0A804HJQ9;A0A804HIY0;G3V5M4;G3V380	P12814;A0A804HII9;A0A804HK61;A0A804HKE2;A0A804HIN7;A0A7I2V4Y4;A0A804HJU8;A0A804HLD0;A0A804HLF4	Alpha-actinin-1	ACTN1
29.7494	30.5267	28.3285	29.8208	29.9184	29.9148			0.210379	1	-0.349801	-0.542864	0	P12830;H3BVI7;H3BNC6;J3QKP1	P12830	Cadherin-1;E-Cad/CTF1;E-Cad/CTF2;E-Cad/CTF3	CDH1
28.9758	29.1027	28.6169	29.2819	29.1764	29.2598			1.07583	0.289881	-0.340928	-2.28867	0	P12955;A0A494C165;K7ES25;A0A494C194;V9GYE4	P12955;A0A494C165;K7ES25	Xaa-Pro dipeptidase	PEPD
30.748	30.8858	30.1651	30.8961	30.8572	31.1799			0.71004	0.590359	-0.378092	-1.5548	0	P12956;B1AHC9	P12956;B1AHC9	X-ray repair cross-complementing protein 6	XRCC6
30.8683	31.1464	30.8228	31.1678	30.9467	30.9997			0.310845	1	-0.0922248	-0.761416	0	P13010;C9JZ81;H7C0H9	P13010	X-ray repair cross-complementing protein 5	XRCC5
29.3174	29.424	28.7761	29.6288	29.7546	29.4829			0.978259	0.330877	-0.449622	-2.08745	0	P13073;H3BPG0;Q86WV2;H3BN72;H3BNV9;H3BNI5	P13073;H3BPG0;Q86WV2;H3BN72;H3BNV9	Cytochrome c oxidase subunit 4 isoform 1, mitochondrial	COX4I1
29.707	29.8082	29.4593	29.7603	30.1404	30.1939			1.02287	0.314539	-0.373382	-2.17881	0	P13489;H0YCR7;E9PMJ3;E9PLZ3;E9PIM9;E9PIK5;E9PMN0;E9PMA9;E9PR82;E9PMI1	P13489	Ribonuclease inhibitor	RNH1
32.1134	32.0355	31.5194	32.397	32.5875	32.5459			1.47474	0.143206	-0.620682	-3.18059	0	P13639;M0R0I6	P13639	Elongation factor 2	EEF2
31.5383	31.5427	30.95	31.356	31.5199	31.5534			0.256132	1	-0.132778	-0.644319	0	P13667	P13667	Protein disulfide-isomerase A4	PDIA4
26.277	27.0311	25.4577	26.4555	26.6866	27.1102			0.429683	1	-0.495518	-1.00489	0	P13674	P13674	Prolyl 4-hydroxylase subunit alpha-1	P4HA1
27.3525	27.8015	26.9662	27.4667	27.6449	27.0496			0.0151289	1	-0.0136522	-0.0456676	0	P13716;B7ZBK6	P13716	Delta-aminolevulinic acid dehydratase	ALAD
28.7493	29.546	28.0665	28.9747	28.9177	28.9292			0.131768	1	-0.153267	-0.358198	0	P13797;A0A0A0MSQ0;U3KQI3;H7C4N2;P13796;Q5TBN3;F2Z2Z9	P13797;A0A0A0MSQ0	Plastin-3	PLS3
30.4363	31.1816	29.8881	30.7584	30.7221	30.8796			0.307046	1	-0.284683	-0.75341	0	P13804;H0YLU7;H0YK49;H0YL12;H0YNX6;H0YKF0;H0YL83;H0YM12;J3KN60	P13804;H0YLU7;H0YK49;H0YL12;H0YNX6;H0YKF0	Electron transfer flavoprotein subunit alpha, mitochondrial	ETFA
28.3561	28.6677	26.9795	28.6055	28.5516	28.6899			0.518667	0.939092	-0.614557	-1.18129	0	P13807;M0QYU1;P54840	P13807	Glycogen [starch] synthase, muscle	GYS1
27.7206	28.0852	27.0659	27.8392	27.9388	27.4583			0.134899	1	-0.12154	-0.365863	0	P13861;H7C330;H7C1L0;H7C4A9;C9J830	P13861	cAMP-dependent protein kinase type II-alpha regulatory subunit	PRKAR2A
28.5581	28.0871	26.9839	28.5754	28.1723	28.5987			0.516197	0.941172	-0.572436	-1.17644	0	P13984	P13984	General transcription factor IIF subunit 2	GTF2F2
32.9909	33.3863	32.6082	32.8291	33.0672	32.8136			0.142325	1	0.0918109	0.383928	0	P14174	P14174	Macrophage migration inhibitory factor	MIF
29.9638	28.8917	30.3765	30.584	30.5172	30.7128			0.899732	0.384762	-0.860657	-1.92893	0	P14324;A0A087X1D8;A0A087WVN4;A0A087WTP2;A0A087X090	P14324;A0A087X1D8;A0A087WVN4	Farnesyl pyrophosphate synthase	FDPS
31.032	31.4714	29.9647	30.8744	30.8753	30.9592			0.0621535	1	-0.080225	-0.178977	0	P14550;Q5T621;V9GYG2;V9GYP9	P14550	Alcohol dehydrogenase [NADP(+)]	AKR1A1
34.1141	34.8259	33.2118	34.4276	34.4668	34.415			0.341665	1	-0.385857	-0.82577	0	P14618;B4DNK4	P14618;B4DNK4	Pyruvate kinase PKM;Pyruvate kinase	PKM
29.4031	29.7732	27.1874	29.3663	29.9017	29.5733			0.429432	1	-0.82585	-1.00439	0	P14854;A0A494C160	P14854	Cytochrome c oxidase subunit 6B1	COX6B1
31.1303	31.1344	30.6983	31.2725	31.3528	31.5027			1.14416	0.249674	-0.38835	-2.43295	0	P14866;M0QXS5	P14866;M0QXS5	Heterogeneous nuclear ribonucleoprotein L	HNRNPL
30.201	29.9784	29.3248	30.4443	30.3919	30.3327			0.98173	0.331679	-0.554865	-2.09452	0	P14868;C9J7S3;C9JLC1;H7BZ35;H7C278;C9JQM9	P14868	Aspartate--tRNA ligase, cytoplasmic	DARS
30.0129	30.5563	28.3699	30.1864	30.1187	30.251			0.338264	1	-0.538999	-0.818717	0	P14923;C9J826;C9JK18;C9JKY1;C9JTX4;C9JPI2;K7ERP3	P14923	Junction plakoglobin	JUP
28.7825	29.7197	29.5605	29.412	29.3038	29.7581			0.16071	1	-0.137078	-0.427982	0	P14927;B7Z2R2;E5RHG9	P14927;B7Z2R2;E5RHG9	Cytochrome b-c1 complex subunit 7	UQCRB
28.6746	28.7433	28.3784	28.6683	28.5909	28.4449			0.0838557	1	0.0307198	0.236845	0	P15104;A0A2R8YDT1	P15104;A0A2R8YDT1	Glutamine synthetase	GLUL
29.7688	30.3371	28.4445	30.0379	30.1131	29.9809			0.39647	1	-0.527134	-0.937987	0	P15170;H3BR35;H3BSV8	P15170;H3BR35	Eukaryotic peptide chain release factor GTP-binding subunit ERF3A	GSPT1
29.3894	29.7119	27.9436	30.0354	29.835	29.5879			0.650809	0.718404	-0.804436	-1.43936	0	P15374;A0A087WTB8;Q5TBK7	P15374;A0A087WTB8;Q5TBK7	Ubiquitin carboxyl-terminal hydrolase isozyme L3;Ubiquitin carboxyl-terminal hydrolase	UCHL3
25.5959	27.004	26.4126	26.4339	26.3504	26.7768			0.160163	1	-0.182852	-0.426684	0	P15428;E9PBZ2;E9PD69;D6RHF8;D6RA66;D6RA83	P15428;E9PBZ2;E9PD69	15-hydroxyprostaglandin dehydrogenase [NAD(+)]	HPGD
31.5632	31.7156	30.8345	31.4452	31.5969	31.5407			0.221636	1	-0.156515	-0.568172	0	P15559;B4DLR8;H3BNV2;H3BRK3	P15559;B4DLR8;H3BNV2;H3BRK3	NAD(P)H dehydrogenase [quinone] 1	NQO1
28.8943	29.2619	28.529	28.9287	29.1023	29.5752			0.463051	0.998597	-0.306959	-1.07145	0	P15586;H7C3P4;F6S8M0;F5H4C6;H0YFA9	P15586;H7C3P4;F6S8M0;F5H4C6	N-acetylglucosamine-6-sulfatase	GNS
30.0048	30.4378	29.0903	30.6425	30.9063	30.4635			0.92503	0.372011	-0.82648	-1.9797	0	P15880;H0YEN5;E9PMM9;E9PQD7;I3L404;E9PPT0;E9PM36;H3BNG3;H0YE27	P15880;H0YEN5;E9PMM9;E9PQD7;I3L404;E9PPT0;E9PM36	40S ribosomal protein S2	RPS2
29.0011	29.5289	28.2643	29.0885	29.0377	29.0533			0.12838	1	-0.128413	-0.349871	0	P15924;A0A804HL18	P15924	Desmoplakin	DSP
25.9833	27.6883	29.1181	28.3772	29.0502	28.8411			0.553756	0.892376	-1.15967	-1.25009	0	P15927;Q5TEJ0;Q5TEJ7	P15927;Q5TEJ0	Replication protein A 32 kDa subunit	RPA2
28.5201	28.7656	28.0558	28.624	28.7258	28.7364			0.515745	0.941332	-0.248224	-1.17555	0	P16144;J3QQL2;J3QRK0;J3KSH9	P16144	Integrin beta-4	ITGB4
30.0422	30.6647	29.61	30.1164	30.3312	30.3789			0.207612	1	-0.169869	-0.536606	0	P16152;E9PQ63;A8MTM1	P16152;E9PQ63;A8MTM1	Carbonyl reductase [NADPH] 1	CBR1
27.6099	27.9233	27.5138	27.8158	27.8264	28.4955			0.639307	0.732157	-0.363574	-1.41696	0	P16219;E9PE82	P16219;E9PE82	Short-chain specific acyl-CoA dehydrogenase, mitochondrial	ACADS
29.3016	29.3591	27.823	29.1575	29.189	29.1663			0.27364	1	-0.343038	-0.682235	0	P16278;E7EQ29;C9J4G9;C9J539;Q6UWU2	P16278;E7EQ29	Beta-galactosidase	GLB1
30.0007	29.9618	29.8373	30.082	30.4573	30.6315			1.26522	0.205908	-0.456956	-2.69639	0	P16401	P16401	Histone H1.5	HIST1H1B
31.2926	30.846	29.6514	31.6681	31.5045	32.3537			1.05505	0.297212	-1.24548	-2.24538	0	P16403	P16403	Histone H1.2	HIST1H1C
27.5244	28.0781	27.1253	28.4534	28.1421	28.3201			1.17993	0.245295	-0.729281	-2.50967	0	P16435;H0Y4R2;E7EMD0;E7EWU0;C9JU80	P16435;H0Y4R2;E7EMD0	NADPH--cytochrome P450 reductase	POR
28.6919	29.4536	27.8789	29.1906	28.9659	29.1776			0.401463	1	-0.436545	-0.948093	0	P16444;H3BQS5;H3BP43	P16444	Dipeptidase 1	DPEP1
27.995	28.3552	26.4952	28.5921	28.8782	28.4838			0.825725	0.442309	-1.03622	-1.78178	0	P16615;H7C5W9;O14983;Q93084;H3BVB2;H3BTW4	P16615;H7C5W9	Sarcoplasmic/endoplasmic reticulum calcium ATPase 2	ATP2A2
30.5805	31.2254	30.3549	30.8199	30.662	30.5946			0.0353212	1	0.0281054	0.104384	0	P16949;A2A2D0	P16949;A2A2D0	Stathmin	STMN1
28.4815	28.6717	27.9848	29.0512	28.8416	28.7285			1.02944	0.315408	-0.494453	-2.19235	0	P16989;A0A0D9SEI8	P16989	Y-box-binding protein 3	YBX3
29.0313	29.2399	28.9234	29.339	30.0254	29.377			1.00235	0.319919	-0.515619	-2.13667	0	P17096	P17096	High mobility group protein HMG-I/HMG-Y	HMGA1
30.1218	30.3137	28.7593	29.9358	29.9523	29.957			0.16707	1	-0.216779	-0.443015	0	P17174	P17174	Aspartate aminotransferase, cytoplasmic	GOT1
28.5437	28.5044	27.8402	28.5998	28.5332	28.5181			0.481073	0.969324	-0.254227	-1.10718	0	P17301	P17301	Integrin alpha-2	ITGA2
29.6353	30.2985	28.6997	29.7727	29.6935	29.3967			0.0552417	1	-0.0764809	-0.160104	0	P17655	P17655	Calpain-2 catalytic subunit	CAPN2
28.9618	28.7624	27.1492	28.9192	28.8337	28.9603			0.460514	0.997022	-0.613276	-1.06641	0	P17858;F8WEU2	P17858	ATP-dependent 6-phosphofructokinase, liver type	PFKL
31.4692	31.1845	31.1765	31.4973	31.4928	31.7475			1.11249	0.26186	-0.302479	-2.3657	0	P17931;G3V3R6	P17931;G3V3R6	Galectin-3;Galectin	LGALS3
30.2075	30.5989	28.4071	30.5613	30.682	30.3835			0.519139	0.937386	-0.80445	-1.18222	0	P17987;E7ERF2;E7EQR6;F5H282;F5GZ03;F5GZI8;F5GYL4;F5H7Y1	P17987;E7ERF2;E7EQR6;F5H282	T-complex protein 1 subunit alpha	TCP1
26.8165	27.9629	24.5149	27.2791	26.7308	26.7982			0.187502	1	-0.504564	-0.49064	0	P18031;B4DSN5	P18031;B4DSN5	Tyrosine-protein phosphatase non-receptor type 1;Tyrosine-protein phosphatase non-receptor type	PTPN1
27.0226	26.968	25.5122	27.0941	26.7145	27.0976			0.385626	1	-0.467773	-0.915979	0	P18084;V9GZ57;H7C5U2;V9GYZ1;H7C4W1;V9GYD8;H7C580	P18084;V9GZ57;H7C5U2	Integrin beta-5;Integrin beta	ITGB5
29.5623	30.7398	24.8264	30.3094	30.3423	29.6349			0.399344	1	-1.71942	-0.943807	0	P18085;C9JPM4;C9JAK5;U3KQF2	P18085;C9JPM4;C9JAK5	ADP-ribosylation factor 4	ARF4
31.4391	32.1654	30.6138	31.8982	31.8273	31.6022			0.333656	1	-0.36979	-0.809142	0	P18124;A8MUD9;C9JIJ5;C9JZ88	P18124;A8MUD9	60S ribosomal protein L7	RPL7
30.2143	30.3504	29.9408	30.4013	30.5306	30.6839			1.19565	0.243051	-0.370102	-2.54368	0	P18206;A0A096LPE1	P18206	Vinculin	VCL
27.8751	28.5733	27.1598	27.4383	27.8813	28.0382			0.0652315	1	0.0835114	0.18731	0	P18583;J3QSZ5	P18583;J3QSZ5	Protein SON	SON
27.0406	26.8536	24.8396	27.4668	27.4795	27.5683			0.828285	0.440998	-1.26026	-1.78684	0	P18615;A0A0A0MT02;A0A0A0MSN9;A0A0G2JI50;E9PD43;A2ABK4;E7ENC7;E7EWR7	P18615;A0A0A0MT02;A0A0A0MSN9;A0A0G2JI50;E9PD43	Negative elongation factor E	NELFE
32.5439	32.5411	31.2118	32.5689	32.7038	32.6311			0.52971	0.9176	-0.535666	-1.20298	0	P18669;P15259;Q8N0Y7	P18669	Phosphoglycerate mutase 1	PGAM1
29.8759	30.2915	28.5423	29.953	30.3198	30.0423			0.423584	1	-0.535109	-0.992658	0	P18754;C9JW69;C9JRH2;C9J3R0;C9JMJ4;C9JQZ4	P18754;C9JW69;C9JRH2;C9J3R0;C9JMJ4;C9JQZ4	Regulator of chromosome condensation	RCC1
28.5564	28.4936	27.8053	28.5526	28.9437	28.7243			0.790167	0.489694	-0.455091	-1.7117	0	P18859;A8MUH2	P18859;A8MUH2	ATP synthase-coupling factor 6, mitochondrial	ATP5J
26.644	26.8785	24.4348	26.5783	27.2539	26.8888			0.501666	0.956535	-0.92121	-1.14784	0	P18887;F5H8D7;M0R0D2;M0QZ96;M0R1U8;M0QYS5	P18887;F5H8D7	DNA repair protein XRCC1	XRCC1
26.0636	26.5647	25.1214	26.2958	26.4464	26.5654			0.531814	0.916133	-0.51929	-1.2071	0	P19174;A0A0D9SEK2;V9GY63	P19174	1-phosphatidylinositol 4,5-bisphosphate phosphodiesterase gamma-1	PLCG1
27.7945	27.8691	27.8386	28.0282	28.1366	28.2159			2.126	0.0520952	-0.292841	-5.00166	0	P19367;B1AR62;Q2TB90;A0A2R8Y626	P19367	Hexokinase-1	HK1
28.4385	29.306	27.6566	28.3991	28.4979	28.5026			0.00033535	1	0.00049146	0.00102917	0	P19623;K7ESL0;K7EKM4;K7EL89;K7EQ47	P19623	Spermidine synthase	SRM
27.9503	28.2278	27.4389	28.2364	28.1789	28.5504			0.804776	0.47104	-0.449567	-1.74045	0	P19784;H3BNI9;H3BSA1	P19784;H3BNI9;H3BSA1	Casein kinase II subunit alpha	CSNK2A2
27.9952	28.5913	26.4027	28.1091	28.1052	27.9713			0.240022	1	-0.398795	-0.609008	0	P19838	P19838	Nuclear factor NF-kappa-B p105 subunit;Nuclear factor NF-kappa-B p50 subunit	NFKB1
27.08	28.0509	25.3654	27.5143	27.426	27.6926			0.379073	1	-0.712175	-0.902636	0	P20020;E7ERY9;A0A804HKZ0;Q16720;F8W1V5;A0A0U1RQU3;A0A2R8Y4R4;A0A2U3U055;A0A2U3TZI3;Q01814;H0YHH6	P20020	Plasma membrane calcium-transporting ATPase 1	ATP2B1
29.1199	29.4741	28.6204	28.8828	28.9418	29.1916			0.088613	1	0.0660769	0.249267	0	P20042	P20042	Eukaryotic translation initiation factor 2 subunit 2	EIF2S2
27.8371	28.5169	27.4954	27.9393	27.9455	27.6676			0.114521	1	0.0990098	0.315429	0	P20073	P20073	Annexin A7	ANXA7
29.6529	30.7543	29.2287	29.953	30.872	30.0818			0.323375	1	-0.423623	-0.787702	0	P20290;A0A7I2V5Y3	P20290;A0A7I2V5Y3	Transcription factor BTF3	BTF3
27.0884	25.2664	24.6208	29.4286	27.3744	28.8173			1.40269	0.151716	-2.88157	-3.00963	0	P20338;A0A087WYT5	P20338;A0A087WYT5	Ras-related protein Rab-4A	RAB4A
29.6906	29.183	28.4975	30.8359	30.2398	29.8975			1.27641	0.199649	-1.20071	-2.7213	0	P20340;F5H3K7;Q9NRW1;C9JU14;F5GX61;J3KR73;C9JB90;C9J0I2;Q14964	P20340;F5H3K7	Ras-related protein Rab-6A	RAB6A
30.6412	30.7193	31.0398	31.3619	30.9835	31.1249			1.01774	0.312014	-0.35668	-2.16825	0	P20618	P20618	Proteasome subunit beta type-1	PSMB1
28.1531	28.1249	28.6422	28.2504	28.9525	29.0355			0.662838	0.689356	-0.439355	-1.46279	0	P20645;F5GX30;F5GXE0;H0YGE9;F5GXU0;H0YGT2;F5H883;H0YF90	P20645;F5GX30	Cation-dependent mannose-6-phosphate receptor	M6PR
29.7686	30.3995	28.3676	29.4376	29.7856	29.832			0.101452	1	-0.173143	-0.282358	0	P20674;H3BNX8;H3BRM5;H3BV69;H3BRI0	P20674;H3BNX8	Cytochrome c oxidase subunit 5A, mitochondrial	COX5A
30.2831	30.2716	28.8653	30.36	30.3707	30.227			0.469244	0.985944	-0.51255	-1.08375	0	P20700;E9PBF6;A0A0D9SFE5;A0A0D9SFY5	P20700;E9PBF6;A0A0D9SFE5	Lamin-B1	LMNB1
28.1021	28.452	24.821	27.9405	27.9091	27.9341			0.279224	1	-0.802868	-0.694235	0	P20839;A0A3B3IRL5;C9J381;C9K0R9;C9J029;H7C5T1;H7C511	P20839;A0A3B3IRL5;C9J381	Inosine-5-monophosphate dehydrogenase 1;Inosine-5-monophosphate dehydrogenase	IMPDH1
30.5125	31.3777	28.471	31.4738	31.4404	31.3381			0.683749	0.64548	-1.29704	-1.50353	0	P21266;A0A0A0MTN3;E9PLF1;E9PHN7;A0A3B3IRM5;E9PHN6;Q5T8R1;F6XZQ7;P46439;P28161	P21266;A0A0A0MTN3	Glutathione S-transferase Mu 3	GSTM3
29.2646	29.8559	28.3556	29.5808	29.5468	29.335			0.30173	1	-0.328804	-0.742179	0	P21281;H0YC04;C9JL73;P15313;E5RGH6;H0YAT8;C9JNS9	P21281;H0YC04	V-type proton ATPase subunit B, brain isoform	ATP6V1B2
28.5	28.471	27.0179	28.9197	28.793	28.9905			0.85335	0.415067	-0.904786	-1.83649	0	P21283;E7EV59	P21283;E7EV59	V-type proton ATPase subunit C 1	ATP6V1C1
29.5829	29.1435	29.4481	30.3835	30.3633	30.1908	+	3ha_huvec	2.51746	0.0145	-0.921035	-6.4132	0	P21291;E9PS42;E9PND2;E9PP21	P21291;E9PS42;E9PND2;E9PP21	Cysteine and glycine-rich protein 1	CSRP1
31.2904	31.3679	30.8333	31.295	31.4566	31.4101			0.572539	0.849104	-0.223344	-1.2868	0	P21333;A0A7P0NMY4;F8WE98;A0A087WWY3;A0A7I2V3E6;H0Y5C6;H0Y5F3;A0A669KBC6;H7C2E7	P21333;A0A7P0NMY4	Filamin-A	FLNA
29.1618	29.7847	27.9023	29.0321	29.3203	29.3821			0.201794	1	-0.295246	-0.523394	0	P21399	P21399	Cytoplasmic aconitate hydratase	ACO1
26.5178	27.3896	24.492	27.3468	27.3588	27.2521			0.620771	0.761503	-1.18609	-1.38086	0	P21589;Q96B60;H0Y7R7;H0Y3X5	P21589;Q96B60	5-nucleotidase	NT5E
31.0571	31.6233	30.7981	31.2045	31.498	31.2469			0.237304	1	-0.156964	-0.60301	0	P21796;C9JI87	P21796;C9JI87	Voltage-dependent anion-selective channel protein 1	VDAC1
29.2389	30.0499	28.7356	28.9348	28.9353	28.8079			0.510395	0.944971	0.44875	1.16503	0	P21912;A0A087WWT1;A0A087WXX8	P21912;A0A087WWT1;A0A087WXX8	Succinate dehydrogenase [ubiquinone] iron-sulfur subunit, mitochondrial	SDHB
28.0231	28.8048	24.19	28.2995	28.526	27.8494			0.351779	1	-1.21899	-0.846677	0	P21953	P21953	2-oxoisovalerate dehydrogenase subunit beta, mitochondrial	BCKDHB
31.0465	31.4229	28.6763	31.5186	30.9353	30.9876			0.363103	1	-0.765289	-0.869972	0	P21964;E7EMS6;A0A7I2V370;E7EUU8;A0A7I2V3G7;H7BZ45;F8WBW9	P21964;E7EMS6;A0A7I2V370;E7EUU8;A0A7I2V3G7;H7BZ45	Catechol O-methyltransferase	COMT
26.6931	26.9679	26.6053	26.798	26.5713	26.6391			0.268152	1	0.0859509	0.6704	0	P22033	P22033	Methylmalonyl-CoA mutase, mitochondrial	MUT
29.5294	29.4067	28.0147	28.9431	29.2075	29.1176			0.0756158	1	-0.105815	-0.215112	0	P22059;H0YCV6;A0A0A0MSB4;Q6ZN50;Q969R2	P22059	Oxysterol-binding protein 1	OSBP
29.5319	29.0251	27.6767	29.056	29.2894	28.543			0.13504	1	-0.218224	-0.366209	0	P22087;M0QXL5;M0R299;M0R2Q4;M0R0P1;M0R2U2;M0R1H0;M0R2B0;M0QXC9	P22087;M0QXL5;M0R299;M0R2Q4;M0R0P1;M0R2U2;M0R1H0;M0R2B0	rRNA 2-O-methyltransferase fibrillarin	FBL
30.4212	30.8555	29.5249	30.6756	30.7142	30.5332			0.399906	1	-0.37382	-0.944943	0	P22102;F8WD69;C9JBJ1;C9JTV6;C9JZG2;C9JKQ7;A0A140TA71;H7C366	P22102	Trifunctional purine biosynthetic protein adenosine-3;Phosphoribosylamine--glycine ligase;Phosphoribosylformylglycinamidine cyclo-ligase;Phosphoribosylglycinamide formyltransferase	GART
30.4606	30.7614	30.4042	30.8507	30.7057	30.4986			0.401295	1	-0.142902	-0.947754	0	P22234;E9PBS1;D6RF62	P22234;E9PBS1;D6RF62	Multifunctional protein ADE2;Phosphoribosylaminoimidazole-succinocarboxamide synthase;Phosphoribosylaminoimidazole carboxylase	PAICS
29.0441	28.7814	28.1585	29.4903	29.6162	29.5081			1.52475	0.139544	-0.876895	-3.30224	0	P22307;H0YF61;E9PLD1;H0YCB0	P22307	Non-specific lipid-transfer protein	SCP2
31.8708	32.2568	31.094	32.0161	32.197	32.3585			0.560958	0.87665	-0.449983	-1.26417	0	P22314;Q5JRR6;Q5JRR9;Q5JRS0;Q5JRS2;Q5JRS1;Q5JRS3	P22314	Ubiquitin-like modifier-activating enzyme 1	UBA1
29.0817	28.9932	28.888	28.8148	28.9133	28.7997			1.02623	0.313039	0.145022	2.18574	0	P22570;A0A0C4DFN8;A0A0A0MSZ4;A0A0A0MT64;A0A0A0MTN9;J3QQX3;A0A0A0MTR6;A0A0C4DGN7;J3QKZ8;J3QQW7;J3KS64	P22570;A0A0C4DFN8;A0A0A0MSZ4;A0A0A0MT64;A0A0A0MTN9;J3QQX3;A0A0A0MTR6;A0A0C4DGN7	NADPH:adrenodoxin oxidoreductase, mitochondrial	FDXR
32.5523	32.4014	30.8667	32.7284	32.6834	32.7585			0.658037	0.699361	-0.783291	-1.45344	0	P22626;A0A7I2V4I6;A0A7I2V323;A0A7I2V4N1;A0A7I2V3P1;A0A7I2V3P7;A0A7I2V4S4;A0A087WUI2;A0A024RA28;A0A7I2V4N0;A0A7I2YQN4	P22626;A0A7I2V4I6;A0A7I2V323;A0A7I2V4N1;A0A7I2V3P1;A0A7I2V3P7;A0A7I2V4S4;A0A087WUI2;A0A024RA28;A0A7I2V4N0;A0A7I2YQN4	Heterogeneous nuclear ribonucleoproteins A2/B1	HNRNPA2B1;HNRPA2B1
29.826	29.9855	28.6674	29.9431	30.0084	29.968			0.50528	0.950735	-0.480204	-1.15496	0	P22695;H3BRG4;H3BSJ9;H3BP04;H3BUE4;H3BUI9;A0A087WVZ4	P22695;H3BRG4;H3BSJ9;H3BP04	Cytochrome b-c1 complex subunit 2, mitochondrial	UQCRC2
28.3912	28.9989	26.6594	29.085	28.4996	28.9177			0.493692	0.964721	-0.817585	-1.13211	0	P22830;A0A499FJN5;K7ELX4;K7EJX5;K7EJM8	P22830;A0A499FJN5;K7ELX4	Ferrochelatase, mitochondrial	FECH
29.2672	29.8436	28.5941	29.5468	29.7008	29.5451			0.424383	1	-0.362645	-0.994262	0	P23229;C9JXX7;H7BZ97	P23229	Integrin alpha-6;Integrin alpha-6 heavy chain;Integrin alpha-6 light chain;Processed integrin alpha-6	ITGA6
31.1192	31.2653	30.4367	31.1937	31.1851	31.5087			0.571353	0.850463	-0.355395	-1.28448	0	P23246;H0Y9K7;H0Y9U2	P23246	Splicing factor, proline- and glutamine-rich	SFPQ
27.4275	28.2955	25.8989	27.6368	27.9167	27.6048			0.293071	1	-0.512103	-0.723809	0	Q9NRH3;P23258;A0A7P0T9G6;K7EKE5;K7EIS0	Q9NRH3;P23258;A0A7P0T9G6;K7EKE5;K7EIS0	Tubulin gamma-2 chain;Tubulin gamma-1 chain;Tubulin gamma chain	TUBG2;TUBG1
30.0656	30.4083	29.4346	29.9096	30.0835	30.3548			0.177521	1	-0.146421	-0.467499	0	P23381;G3V3Y5;G3V3H8;G3V277;H0YJP3;G3V456;G3V5U1;G3V227;G3V3P2;G3V423;G3V3S7;G3V2Y7;G3V3X0;G3V5W1;G3V4N8;G3V4C7;G3V2C0;G3V339;G3V313;G3V4S4;G3V3R3;G3V2F2;P78534;G3V4N0;G3V4Q0;G3V4A3;G3V5H5	P23381	Tryptophan--tRNA ligase, cytoplasmic;T1-TrpRS;T2-TrpRS	WARS
31.2829	31.3678	31.3505	31.3543	31.5594	31.4307			0.811604	0.459473	-0.114372	-1.75391	0	P23396;E9PL09;E9PPU1;H0YEU2;F2Z2S8;H0YCJ7;H0YF32;E9PSF4;E9PQ96;E9PJH4;E9PK82;E9PQX2;H0YES8;E9PJN9	P23396;E9PL09;E9PPU1;H0YEU2;F2Z2S8;H0YCJ7	40S ribosomal protein S3	RPS3
25.8657	26.3225	25.1041	28.4145	28.3427	28.7646	+	3ha_huvec	2.7157	0.00775	-2.74318	-7.24705	0	P23434;A0A1W2PQV2;H3BNV1;H3BUH9;A0A1W2PRH4;A0A1W2PPE4;A0A1W2PNX3;A0A1W2PPQ1;A0A1W2PS29	P23434;A0A1W2PQV2;H3BNV1;H3BUH9;A0A1W2PRH4;A0A1W2PPE4;A0A1W2PNX3;A0A1W2PPQ1;A0A1W2PS29	Glycine cleavage system H protein, mitochondrial	GCSH
30.3168	30.1413	29.7511	30.7953	30.8165	30.8829			1.96616	0.0783571	-0.761834	-4.50146	0	P23526	P23526	Adenosylhomocysteinase	AHCY
32.3739	31.8533	31.3922	32.279	32.4515	32.7069			0.913852	0.373902	-0.605982	-1.95724	0	P23528;G3V1A4;E9PP50;E9PK25;E9PQB7;E9PLJ3;E9PS23	P23528;G3V1A4;E9PP50;E9PK25;E9PQB7;E9PLJ3;E9PS23	Cofilin-1	CFL1
28.3872	27.7416	24.8971	28.2616	28.1487	27.8603			0.428566	1	-1.08158	-1.00265	0	P23919;H7BZ20;H7C312;G5E9E9;H7C3A4	P23919;H7BZ20;H7C312	Thymidylate kinase	DTYMK
27.3113	27.6123	24.9118	26.7766	27.2878	27.3906			0.243545	1	-0.539832	-0.616767	0	P23921;E9PL69;E9PP77;H0YCY7	P23921;E9PL69	Ribonucleoside-diphosphate reductase large subunit	RRM1
31.2943	32.2865	30.629	31.4252	31.5063	31.0327			0.0561719	1	0.0818647	0.162657	0	P24534;C9JZW3;F2Z2G2;F8WF65	P24534	Elongation factor 1-beta	EEF1B2
29.1693	29.0547	27.2173	29.4511	29.2043	28.6478			0.386951	1	-0.620628	-0.918674	0	P24539;Q5QNZ2	P24539;Q5QNZ2	ATP synthase F(0) complex subunit B1, mitochondrial	ATP5F1
28.4308	28.9252	27.8126	28.7959	28.6406	28.9261			0.527144	0.922066	-0.398018	-1.19794	0	P24666;G5E9R5;F2Z2Q9;D3YTI2	P24666;G5E9R5	Low molecular weight phosphotyrosine protein phosphatase	ACP1
30.0443	29.7251	28.3802	30.261	30.3869	30.2999			0.847279	0.418272	-0.932747	-1.82444	0	P24752;A0A5F9ZHL1;A0A5F9ZHJ7;A0A5F9ZHH9;A0A5F9ZHL7;H0YEL7;E9PRQ6	P24752;A0A5F9ZHL1;A0A5F9ZHJ7	Acetyl-CoA acetyltransferase, mitochondrial	ACAT1
28.3778	28.8328	28.0085	28.2863	28.2615	28.2323			0.24167	1	0.146357	0.612642	0	P25205;J3KQ69;A0A499FHX9;Q7Z6P5	P25205;J3KQ69;A0A499FHX9	DNA replication licensing factor MCM3	MCM3
28.3473	28.8766	27.5552	28.5543	28.408	28.4583			0.215122	1	-0.213871	-0.553558	0	P25325;B1AH49	P25325;B1AH49	3-mercaptopyruvate sulfurtransferase;Sulfurtransferase	MPST
31.5251	31.5671	30.6369	31.6204	31.6158	31.3182			0.359013	1	-0.275134	-0.861571	0	P25398	P25398	40S ribosomal protein S12	RPS12
26.5915	26.4519	25.2635	26.4082	26.8221	26.7041			0.546523	0.898467	-0.542512	-1.23593	0	P25490;H0YJV7;O15391;H0YJU4;Q96MM3	P25490;H0YJV7;O15391	Transcriptional repressor protein YY1;Transcription factor YY2	YY1;YY2
28.9686	29.6468	28.4261	28.6549	29.2656	29.1131			0.00218059	1	0.00265757	0.00667793	0	P25685;M0QXK0;A0A7I2V3K7;M0R080;M0R1D6;M0QZD0;M0QYT3;A0A7I2YQW1;M0R128;A0A1B0GX60	P25685;M0QXK0;A0A7I2V3K7;M0R080	DnaJ homolog subfamily B member 1	DNAJB1
32.0137	32.0767	32.11	32.2177	32.2247	32.0738			0.863817	0.412284	-0.105302	-1.85728	0	P25705;K7EK77;K7ERX7;K7ENJ4;K7EQH4;K7EJP1;K7ESA0	P25705	ATP synthase subunit alpha, mitochondrial	ATP5A1
30.2517	30.2012	29.5012	30.7537	30.7447	30.7536			1.46718	0.141457	-0.76598	-3.16241	0	P25786;F5GX11;B4DEV8;F5H112	P25786;F5GX11;B4DEV8	Proteasome subunit alpha type-1;Proteasome subunit alpha type	PSMA1
29.79	29.7027	29.1221	29.93	29.9263	29.9749			0.899749	0.385782	-0.405476	-1.92896	0	P25788;G3V4X5;G3V3W4;G3V5N4	P25788	Proteasome subunit alpha type-3	PSMA3
30.7101	30.5068	31.7095	31.9431	31.9859	32.8864			1.26103	0.204841	-1.29631	-2.68709	0	P25815	P25815	Protein S100-P	S100P
26.9566	27.8924	26.5741	26.7694	27.3497	26.5706			0.207389	1	0.244468	0.536099	0	P26006;D6R9X8;K7EMU3;H0YA49	P26006	Integrin alpha-3;Integrin alpha-3 heavy chain;Integrin alpha-3 light chain	ITGA3
28.3728	29.0155	27.8171	28.7725	28.4395	28.2797			0.0904696	1	-0.0953967	-0.254091	0	P26196;Q8IV96	P26196	Probable ATP-dependent RNA helicase DDX6	DDX6
30.7003	31.6236	29.1656	30.9464	30.8744	31.0506			0.254598	1	-0.460634	-0.640975	0	P26368;K7ENG2;K7ELP8	P26368;K7ENG2	Splicing factor U2AF 65 kDa subunit	U2AF2
31.9804	31.9465	30.6826	31.4165	31.4544	31.5843			0.0406951	1	0.0514444	0.119619	0	P26373;J3QSB4;J3KS98;H3BTH3;H3BUK8	P26373;J3QSB4	60S ribosomal protein L13	RPL13
31.9102	31.0849	31.0455	32.7285	32.0177	32.2941			1.33781	0.177161	-0.999912	-2.85977	0	P26447	P26447	Protein S100-A4	S100A4
30.8654	30.9309	30.2408	31.1516	30.9688	31.2999			0.896419	0.382863	-0.461065	-1.9223	0	P26583;D6R9A6	P26583;D6R9A6	High mobility group protein B2	HMGB2
29.9217	30.1022	28.7531	30.1346	30.0916	30.2744			0.603511	0.786541	-0.574521	-1.34723	0	P26639;D6R9F8;D6RCA5;D6RDJ6;A2RTX5;B7ZLP8;D6RBR8;D6RJ97;D6RHV7;D6RCS6	P26639	Threonine--tRNA ligase, cytoplasmic	TARS
30.4686	31.019	29.9863	30.5311	30.6305	30.6809			0.152146	1	-0.122903	-0.407575	0	P26640;A0A140T936;A0A140T954;A2ABF4;A0A0G2JJT9;H0Y426;A0A140T904	P26640;A0A140T936	Valine--tRNA ligase	VARS
30.7957	31.0158	30.0434	30.8718	30.7207	31.0332			0.345907	1	-0.256969	-0.83455	0	P26641	P26641	Elongation factor 1-gamma	EEF1G
26.5731	26.3883	26.0909	25.9709	25.5533	25.6617			1.52693	0.139823	0.622156	3.30759	0	P27105;F8VSL7	P27105	Erythrocyte band 7 integral membrane protein	STOM
27.9041	28.3186	26.8702	28.0633	27.714	28.1639			0.247708	1	-0.282747	-0.625907	0	P27338	P27338	Amine oxidase [flavin-containing] B	MAOB
31.3981	31.1464	30.6834	31.9792	32.0594	32.1633			1.99532	0.0777692	-0.991357	-4.58979	0	P27348;E9PG15	P27348	14-3-3 protein theta	YWHAQ
29.2668	28.8149	27.6885	29.0418	29.2701	29.124			0.51365	0.94054	-0.555271	-1.17143	0	P27361;E9PJF0;E9PQW4;E9PBK7;B3KR49;H0YDH9;H0YEX6;E9PRH7	P27361;E9PJF0;E9PQW4;E9PBK7;B3KR49	Mitogen-activated protein kinase 3;Mitogen-activated protein kinase	MAPK3
31.2072	31.6007	30.2256	31.1354	30.9573	31.1483			0.0578862	1	-0.0691973	-0.167352	0	X1WI28;P27635;B8A6G2;A6QRI9	X1WI28;P27635	60S ribosomal protein L10	RPL10
28.844	29.5224	28.1476	28.87	28.8158	28.8847			0.0157213	1	-0.0188491	-0.0474251	0	P27694;I3L4R8;I3L2M5;I3L524	P27694	Replication protein A 70 kDa DNA-binding subunit;Replication protein A 70 kDa DNA-binding subunit, N-terminally processed	RPA1
29.2608	30.0663	28.842	29.5961	29.5939	29.7494			0.285458	1	-0.256782	-0.707582	0	P27695;G3V3M6;G3V5Q1;G3V3C7;A0A0C4DGK8;G3V5M0;G3V359;H7C4A8;G3V5D9;G3V3Y6;G3V2D9	P27695;G3V3M6;G3V5Q1;G3V3C7;A0A0C4DGK8;G3V5M0;G3V359;H7C4A8	DNA-(apurinic or apyrimidinic site) lyase;DNA-(apurinic or apyrimidinic site) lyase, mitochondrial	APEX1
27.8506	27.6826	26.7252	28.5833	28.6593	28.7115			1.60191	0.132	-1.2319	-3.49503	0	X5D2R7;P28062;Q5JNW7;A0A140T998	X5D2R7;P28062;Q5JNW7;A0A140T998	Proteasome subunit beta type;Proteasome subunit beta type-8	PSM8;PSMB8
30.8695	31.1027	30.0956	31.345	31.3983	31.2837			1.00045	0.320656	-0.653012	-2.13277	0	P28066	P28066	Proteasome subunit alpha type-5	PSMA5
29.9624	30.047	27.6883	30.1271	30.0326	29.9621			0.449246	1	-0.80805	-1.04398	0	P28070	P28070	Proteasome subunit beta type-4	PSMB4
28.8051	27.9807	27.8935	29.5995	29.886	29.096			1.60612	0.133417	-1.30071	-3.50574	0	P28072;I3L3X7;A0A087X2I4	P28072	Proteasome subunit beta type-6	PSMB6
30.0157	29.1741	29.7054	30.1081	30.2127	30.2174			1.03592	0.313897	-0.547691	-2.20574	0	P28074;H0YJM8;G8JLC2;G3V3K3	P28074	Proteasome subunit beta type-5	PSMB5
30.3755	31.0665	30.0287	30.1914	30.2355	30.3911			0.281744	1	0.21758	0.699636	0	P28331;B4DJ81;C9JPQ5;F8WDL5	P28331;B4DJ81	NADH-ubiquinone oxidoreductase 75 kDa subunit, mitochondrial	NDUFS1
29.7904	30.3832	29.7777	30.0495	30.2454	30.3187			0.439872	1	-0.220747	-1.02528	0	P28482;K7ELV1;K7EN18;P31152;Q16659	P28482	Mitogen-activated protein kinase 1	MAPK1
28.2226	28.569	27.7054	28.8883	29.3285	29.3278			1.60211	0.133361	-1.01589	-3.49554	0	P28799;K7EKL3;K7EQI0;K7EMR1;K7EQ05;K7EPL0	P28799;K7EKL3	Granulins;Acrogranin;Paragranulin;Granulin-1;Granulin-2;Granulin-3;Granulin-4;Granulin-5;Granulin-6;Granulin-7	GRN
28.8561	29.3686	28.6153	29.1984	29.3035	29.1303			0.507627	0.950644	-0.2641	-1.15958	0	P28838;H0Y9Q1;H0Y983	P28838	Cytosol aminopeptidase	LAP3
29.0979	29.6142	28.2993	29.2432	29.3555	29.5145			0.39771	1	-0.367249	-0.940499	0	P29144;A0A494C1B8;A0A494C0U1;A0A494C1S4;A0A494C1L2;A0A494C0X4;A0A494C1S6;A0A494C0A3	P29144;A0A494C1B8;A0A494C0U1	Tripeptidyl-peptidase 2	TPP2
25.9263	25.1353	25.8873	26.0611	26.8152	26.1649			0.933762	0.365641	-0.697443	-1.99729	0	P29218;H0YBL1;E5RG13;E5RIP7;E5RG94;E5RIF4;E5RHE9;E5RI82;E5RGY4	P29218;H0YBL1;E5RG13;E5RIP7	Inositol monophosphatase 1	IMPA1
27.5502	28.1175	24.9312	27.8976	27.6875	28.1364			0.453062	1	-1.04091	-1.05159	0	P29317;J3KR66;A0A0B4J1T8;Q9UF33	P29317	Ephrin type-A receptor 2	EPHA2
26.2517	27.2602	26.1438	26.4917	26.5443	25.3432			0.331259	1	0.425509	0.804154	0	P29353;X6R6D0;H0Y539;Q5T182;Q5T188;Q5T181;Q5T187;P98077	P29353;X6R6D0	SHC-transforming protein 1	SHC1
29.3985	29.2028	29.0976	29.4006	29.7968	29.682			1.25621	0.208112	-0.393501	-2.6764	0	P29373;Q5SYZ4;B5MCB5;P29762	P29373;Q5SYZ4	Cellular retinoic acid-binding protein 2	CRABP2
32.1226	32.2223	31.1407	32.3581	32.4914	32.7213			0.89778	0.381223	-0.695047	-1.92502	0	P29401;A0A0B4J1R6;E9PFF2;F8W888;F8WAX4	P29401;A0A0B4J1R6	Transketolase	TKT
31.2523	30.8607	30.4142	31.407	31.2945	31.4444			1.02883	0.31495	-0.539581	-2.19111	0	P29692;E9PRY8;E9PK01;A0A087X1X7;E9PQZ1;E9PQ49;E9PI39;E9PPR1;E9PL12;E9PMW7;E9PL71;H0YE58;E9PIZ1;H0YCK7;E9PN91;E9PQC9	P29692;E9PRY8;E9PK01;A0A087X1X7;E9PQZ1;E9PQ49;E9PI39;E9PPR1;E9PL12	Elongation factor 1-delta	EEF1D
28.9381	28.7014	29.2756	29.2146	29.4657	29.3993			0.996154	0.32253	-0.388132	-2.12398	0	P29966	P29966	Myristoylated alanine-rich C-kinase substrate	MARCKS
26.3282	27.1663	26.9165	26.5352	27.0658	27.1915			0.148033	1	-0.127122	-0.397703	0	P29992;K7EL62;A0A087WVZ3	P29992;K7EL62	Guanine nucleotide-binding protein subunit alpha-11	GNA11
27.9443	28.4468	27.9189	28.373	28.577	28.6702			1.06344	0.294141	-0.436735	-2.26284	0	P30038;Q5TF55	P30038	Delta-1-pyrroline-5-carboxylate dehydrogenase, mitochondrial	ALDH4A1
30.883	31.5751	29.9859	30.8979	30.6653	30.9473			0.0157012	1	-0.0221755	-0.0473656	0	P30040;F8VY02;F8W1G0	P30040;F8VY02	Endoplasmic reticulum resident protein 29	ERP29
31.1792	31.9832	30.6148	31.7392	31.759	31.583			0.469497	0.985574	-0.434682	-1.08425	0	P30041	P30041	Peroxiredoxin-6	PRDX6
29.8202	30.5075	27.9179	30.0139	30.2972	29.8969			0.346045	1	-0.65415	-0.834837	0	P30043;A0A2R8YEP4;M0R192;A0A2R8Y7Y9;M0QZL1	P30043;A0A2R8YEP4;M0R192;A0A2R8Y7Y9;M0QZL1	Flavin reductase (NADPH)	BLVRB
31.9575	32.4776	30.5892	32.1376	31.9533	32.0161			0.253184	1	-0.360883	-0.637889	0	P30044	P30044	Peroxiredoxin-5, mitochondrial	PRDX5
30.4584	30.2554	28.5304	29.8532	29.9757	30.3308			0.185419	1	-0.305192	-0.485831	0	P30046;J3KQ18;B5MC82;A6NHG4;H7C342	P30046;J3KQ18;B5MC82;A6NHG4	D-dopachrome decarboxylase;D-dopachrome decarboxylase-like protein	DDT;DDTL
28.1677	29.0564	24.5048	28.7005	29.0061	29.0946			0.532982	0.916309	-1.69075	-1.2094	0	P30047;H0YNX7;H0YNM1;A0A087WTI4	P30047;H0YNX7	GTP cyclohydrolase 1 feedback regulatory protein	GCHFR
31.5815	32.3864	28.5615	31.616	31.8799	31.7072			0.311982	1	-0.891207	-0.763808	0	P30048	P30048	Thioredoxin-dependent peroxide reductase, mitochondrial	PRDX3
28.8737	28.7808	25.6679	29.2101	29.481	29.1977			0.650791	0.717197	-1.52212	-1.43933	0	P30049;A0A087WTL3	P30049	ATP synthase subunit delta, mitochondrial	ATP5D
31.9359	32.7356	31.3744	32.184	31.9876	31.8525			0.00584607	1	0.00724792	0.017829	0	P30050	P30050	60S ribosomal protein L12	RPL12
31.163	30.9163	31.0615	31.2211	31.0923	31.1816			0.659123	0.696981	-0.118073	-1.45556	0	P30084	P30084	Enoyl-CoA hydratase, mitochondrial	ECHS1
28.1924	29.157	26.6562	28.3259	28.1449	28.5526			0.174249	1	-0.339218	-0.459861	0	P30085;Q5T0D2;A0A494BXC7	P30085;Q5T0D2	UMP-CMP kinase	CMPK1
32.4396	32.9133	31.7745	32.8022	32.9917	32.9552			0.739225	0.542208	-0.540546	-1.61181	0	P30086	P30086	Phosphatidylethanolamine-binding protein 1;Hippocampal cholinergic neurostimulating peptide	PEBP1
31.459	31.9029	30.5778	31.6319	31.7186	31.7638			0.427498	1	-0.391537	-1.00051	0	P30101	P30101	Protein disulfide-isomerase A3	PDIA3
32.1197	31.9242	30.5916	31.8419	32.0385	31.9084			0.326895	1	-0.384473	-0.795056	0	P30153;B3KQV6;C9J9C1;E9PH38;E9PPI5;E9PHZ6;M0QXG4;M0R0K6;E9PNM7	P30153;B3KQV6;C9J9C1	Serine/threonine-protein phosphatase 2A 65 kDa regulatory subunit A alpha isoform	PPP2R1A
28.9819	29.5334	25.4607	29.237	29.3513	29.115			0.413606	1	-1.24246	-0.972595	0	P30154;H0YDG7	P30154	Serine/threonine-protein phosphatase 2A 65 kDa regulatory subunit A beta isoform	PPP2R1B
25.918	26.3215	25.338	26.1611	25.9852	26.5156			0.483154	0.967007	-0.361471	-1.11129	0	P30260;G5EA36;I3L2Z8;I3L328;I3L394;I3L3H6;F6QPS0	P30260;G5EA36	Cell division cycle protein 27 homolog	CDC27
30.2209	30.6123	23.889	30.1873	30.2467	30.0851			0.371253	1	-1.93232	-0.886669	0	P30405;R4GN99;H0Y548	P30405;R4GN99;H0Y548	Peptidyl-prolyl cis-trans isomerase F, mitochondrial;Peptidyl-prolyl cis-trans isomerase	PPIF
27.1895	27.0626	24.8821	27.5897	27.1234	26.6828			0.40255	1	-0.753899	-0.950291	0	P30519;I3L159;I3L1F5;A0A087WT44;I3L276;I3L4P8;A0A1B0GXH0;I3L463;I3L1Y2	P30519;I3L159;I3L1F5;A0A087WT44;I3L276;I3L4P8;A0A1B0GXH0;I3L463	Heme oxygenase 2	HMOX2
28.0989	28.6984	27.3475	27.9224	28.173	27.651			0.115165	1	0.1328	0.317042	0	P30520	P30520	Adenylosuccinate synthetase isozyme 2	ADSS
27.9285	28.3965	26.6112	26.0104	28.1185	25.0235			0.524322	0.927643	1.26126	1.1924	0	P30533;A0A3B3IRQ7;D6REW6	P30533;A0A3B3IRQ7	Alpha-2-macroglobulin receptor-associated protein	LRPAP1
30.2833	30.556	29.6892	30.2056	30.3793	30.2179			0.128049	1	-0.0914313	-0.349054	0	P30740;C9J7N5;O75830	P30740	Leukocyte elastase inhibitor	SERPINB1
27.7043	28.4643	26.2674	28.0967	27.7703	27.4813			0.172225	1	-0.304127	-0.455124	0	P30825;Q5JR49;A0A1W2PR06;P52569	P30825	High affinity cationic amino acid transporter 1	SLC7A1
29.3822	29.4219	28.2387	29.5757	29.6737	29.6689			0.736282	0.546992	-0.625175	-1.60606	0	P30837;A0A0U1RQK9	P30837	Aldehyde dehydrogenase X, mitochondrial	ALDH1B1
31.2375	31.169	30.9768	31.0328	31.1714	31.1364			0.0555507	1	0.0142345	0.160953	0	P30838;I3L3I9;A8MYB8;C9JMC5;E9PNN6;C9JKT2;I3L4E5;I3L1H6;I3L3W9;E9PJV0;P48448;P43353	P30838;I3L3I9;A8MYB8;C9JMC5;E9PNN6;C9JKT2	Aldehyde dehydrogenase, dimeric NADP-preferring	ALDH3A1
29.1031	28.9295	28.6496	29.4946	29.1709	29.0855			0.916133	0.374571	-0.3563	-1.96182	0	P31150;G5E9U5	P31150	Rab GDP dissociation inhibitor alpha	GDI1
29.7753	29.3104	28.566	29.996	29.9506	29.5753			0.761528	0.510271	-0.623426	-1.65548	0	P31153	P31153	S-adenosylmethionine synthase isoform type-2	MAT2A
28.7297	28.6874	27.6788	29.1005	29.0482	29.0686			0.963151	0.343976	-0.707113	-2.05673	0	P31689	P31689	DnaJ homolog subfamily A member 1	DNAJA1
30.0437	30.4411	29.076	29.8291	29.9708	30.2064			0.129816	1	-0.14845	-0.353403	0	P31930	P31930	Cytochrome b-c1 complex subunit 1, mitochondrial	UQCRC1
28.8757	29.3993	27.8071	28.4256	28.2756	28.5528			0.227278	1	0.276051	0.580768	0	P31937;H7BZL2	P31937	3-hydroxyisobutyrate dehydrogenase, mitochondrial	HIBADH
30.2186	30.5301	28.6956	30.4756	30.5594	30.598			0.571426	0.851506	-0.729532	-1.28463	0	P31939;H7C1S2;C9JLK0;F8WEF0	P31939	Bifunctional purine biosynthesis protein PURH;Phosphoribosylaminoimidazolecarboxamide formyltransferase;IMP cyclohydrolase	ATIC
29.1056	28.8863	27.9189	29.049	29.6276	29.1432			0.715971	0.579444	-0.636319	-1.56638	0	P31942	P31942	Heterogeneous nuclear ribonucleoprotein H3	HNRNPH3
30.662	30.3004	29.832	31.1609	31.4291	31.3435			1.84118	0.103582	-1.04634	-4.13671	0	P31946;Q4VY20;Q4VY19;A0A0J9YWE8;A0A0J9YWZ2	P31946	14-3-3 protein beta/alpha;14-3-3 protein beta/alpha, N-terminally processed	YWHAB
30.9383	30.7934	28.8773	31.0644	30.7652	31.3537			0.554581	0.892295	-0.858118	-1.2517	0	P31947	P31947	14-3-3 protein sigma	SFN
31.6254	32.0503	30.3114	31.7103	31.7218	31.6397			0.277256	1	-0.361576	-0.690011	0	P31948;F5H783;F5GXD8;H0YGI8	P31948	Stress-induced-phosphoprotein 1	STIP1
27.7499	27.6636	25.9483	29.1836	29.4843	29.1925			1.65867	0.130512	-2.1662	-3.64103	0	P31949	P31949	Protein S100-A11;Protein S100-A11, N-terminally processed	S100A11
31.1576	31.9826	29.9997	31.6522	31.5549	31.6139			0.413889	1	-0.560352	-0.973166	0	P32119;A6NIW5	P32119;A6NIW5	Peroxiredoxin-2	PRDX2
28.3949	28.1909	27.4169	29.0021	29.2079	29.2268			1.69463	0.127852	-1.14471	-3.73545	0	P32320	P32320	Cytidine deaminase	CDA
25.9243	27.1821	26.6079	26.6594	26.4932	25.849			0.20931	1	0.237574	0.540448	0	P32321;D6RBJ9;D6R9S0;D6RBN2;D6RAR9;D6RC36;D6RAD7	P32321;D6RBJ9;D6R9S0;D6RBN2	Deoxycytidylate deaminase	DCTD
29.9425	30.1888	29.5106	29.6799	29.6984	29.8696			0.25143	1	0.131378	0.634055	0	P32322;E2QRB3;J3KQ22;J3QL24;J3QKT4;J3QR88;J3QLK9;J3QL32;J3QL23;J3KTA8;J3QKT3;J3QRZ0;J3KSA9	P32322;E2QRB3;J3KQ22;J3QL24;J3QKT4	Pyrroline-5-carboxylate reductase 1, mitochondrial;Pyrroline-5-carboxylate reductase	PYCR1
27.1012	27.8077	26.5347	27.4852	27.1824	27.7407			0.329175	1	-0.321533	-0.799813	0	P32929	P32929	Cystathionine gamma-lyase	CTH
30.6115	30.8791	25.2628	31.2379	31.2266	30.1204			0.448024	1	-1.94385	-1.04155	0	P32969;A0A2R8Y5Y7;D6RAN4;H0Y9V9;H0Y9R4	P32969;A0A2R8Y5Y7;D6RAN4;H0Y9V9	60S ribosomal protein L9	RPL9
29.5629	29.8115	28.7836	29.8131	29.8132	29.6805			0.540558	0.899405	-0.382915	-1.22425	0	P33176;A0A7I2V4K6;A0A7I2V3N5;A0A7I2V492;O60282;A0A0G2JMZ6;A0A7I2V581;J3KNA1;A0A6Q8PEZ8;A0A6Q8PGJ3;Q12840;A0A7I2V3V4;A0A7I2YQQ7;A0A7I2V352;A0A6Q8PGT2;A0A6Q8PGN1	P33176	Kinesin-1 heavy chain	KIF5B
29.083	29.7217	27.6012	28.9187	28.9902	28.7543			0.0464576	1	-0.085804	-0.135785	0	P33992;B1AHB1;B1AHB2;B1AHA9	P33992;B1AHB1	DNA replication licensing factor MCM5;DNA helicase	MCM5
29.6855	29.4165	26.7646	29.8125	29.8664	29.1552			0.44261	1	-0.98918	-1.03075	0	P33993;C9J8M6	P33993	DNA replication licensing factor MCM7	MCM7
28.3703	28.9596	27.7001	28.606	28.8567	28.3303			0.256381	1	-0.25428	-0.64486	0	P34896;J3KRZ5;J3KRK5;A0A087WTD8	P34896	Serine hydroxymethyltransferase, cytosolic	SHMT1
30.6319	30.4668	29.8672	30.4568	30.2675	30.452			0.105029	1	-0.0701103	-0.291468	0	P34897;H0YIZ0;G3V2Y4;G3V5L0;G3V4W5;G3V540;G3V2W0;G3V241;G3V3Y8;G3V4T0;G3V4X0;G3V2E4;G3V2D2;G3V2Y1;G3V3C6	P34897;H0YIZ0;G3V2Y4	Serine hydroxymethyltransferase, mitochondrial;Serine hydroxymethyltransferase	SHMT2
27.363	26.1659	25.4399	28.1224	28.3812	27.8137			1.42067	0.149529	-1.78279	-3.05182	0	P34913;E5RFU2;E5RFH6;H0YAW7;E5RI53	P34913;E5RFU2;E5RFH6;H0YAW7	Bifunctional epoxide hydrolase 2;Cytosolic epoxide hydrolase 2;Lipid-phosphate phosphatase	EPHX2
28.5411	27.9591	24.196	28.5379	28.7117	28.4831			0.54412	0.89869	-1.67881	-1.23122	0	P34931;Q53FA3	P34931;Q53FA3	Heat shock 70 kDa protein 1-like	HSPA1L
29.7452	29.9349	29.2396	30.375	30.5378	30.4688			1.73982	0.127722	-0.82063	-3.8563	0	P34932;A0A087WYC1;A0A087WTS8	P34932;A0A087WYC1;A0A087WTS8	Heat shock 70 kDa protein 4	HSPA4
28.4589	28.2193	28.1977	29.3592	29.065	28.0495			0.586324	0.819584	-0.532651	-1.31371	0	P34949;H3BPB8;H3BUZ9;H3BMZ9;H3BPP3;H3BP57;H3BT48;F5GX71;H3BPM5;H3BQX0;H3BNY8;H3BU66;H3BPU7;H3BT46;H3BN01;H3BUG1;B4DYB8	P34949;H3BPB8;H3BUZ9;H3BMZ9;H3BPP3;H3BP57;H3BT48;F5GX71;H3BPM5;H3BQX0;H3BNY8;H3BU66	Mannose-6-phosphate isomerase	MPI
25.3117	26.0665	25.3848	27.2078	27.3158	26.8954	+	3ha_huvec	2.33482	0.0325161	-1.552	-5.71889	0	P35052;H7C024;H7C410;C9J4Y6;H7BZE9	P35052;H7C024;H7C410;C9J4Y6;H7BZE9	Glypican-1;Secreted glypican-1	GPC1
31.0295	30.7743	29.5878	30.6879	30.7988	30.9354			0.311852	1	-0.343515	-0.763534	0	P35232;C9JW96;C9JZ20;E7ESE2;E9PCW0	P35232;C9JW96;C9JZ20;E7ESE2;E9PCW0	Prohibitin	PHB
29.4406	29.719	29.2684	29.7779	29.8742	29.7618			1.13734	0.250591	-0.328654	-2.4184	0	P35237;A0A024QZX5;A0A087X1N8;A0A2R8YD12;A0A2R8Y6A7;A0A2R8YDD0;A0A2R8Y517;A0A2R8Y5S1;A0A2R8Y6N4;C9JTJ8;C9JVA8	P35237;A0A024QZX5;A0A087X1N8;A0A2R8YD12;A0A2R8Y6A7	Serpin B6	SERPINB6
28.4165	29.4295	28.2193	28.6474	28.6537	28.7548			0.00271695	1	0.00313059	0.00831543	0	P35244;B5MC59	P35244;B5MC59	Replication protein A 14 kDa subunit	RPA3
28.4354	28.7334	27.6903	28.0936	28.385	28.2814			0.0346972	1	0.0330111	0.102604	0	P35249;C9JZI1;H7C1P0;C9J8M3;C9JXZ7	P35249;C9JZI1;H7C1P0	Replication factor C subunit 4	RFC4
28.3583	28.7451	25.733	28.0101	28.3392	27.882			0.185659	1	-0.464948	-0.486386	0	P35250;A0A087WVY3;H7C5P4;H7C5S7;H7C5P1;H7C5Q7;F8WC37;H7C5A0;H7C5G4;H7C596	P35250	Replication factor C subunit 2	RFC2
28.8553	28.8218	28.1181	28.8948	29.0675	28.8193			0.583607	0.826517	-0.328824	-1.30841	0	P35269;M0R0R9;M0QXD6;M0R0Z3	P35269;M0R0R9;M0QXD6;M0R0Z3	General transcription factor IIF subunit 1	GTF2F1
29.735	30.3111	26.9013	29.5627	29.933	29.8716			0.310641	1	-0.806643	-0.760985	0	P35270;REV__Q16649	P35270	Sepiapterin reductase	SPR
28.0428	28.5298	26.947	28.2641	28.257	28.1448			0.335822	1	-0.382103	-0.813646	0	P35573;A0A1C7CYW1	P35573	Glycogen debranching enzyme;4-alpha-glucanotransferase;Amylo-alpha-1,6-glucosidase	AGL
31.0086	31.0925	30.1504	31.2823	31.2155	31.3035			0.789054	0.490922	-0.516616	-1.70951	0	P35579;Q5BKV1;B1AH99;REV__S4R3H4;REV__E7EQT4;REV__Q9UKV3;A0A6E1W127;P12883;P13535;Q9UKX3;Q9Y623;P13533;P11055;A7E2Y1	P35579	Myosin-9	MYH9
28.3347	28.8412	26.7538	28.4853	28.4218	28.605			0.346632	1	-0.527472	-0.83605	0	P35580;E7ERA5	P35580	Myosin-10	MYH10
28.8542	29.4202	27.8495	28.7905	28.8592	28.7237			0.0626735	1	-0.0831451	-0.180388	0	P35754	P35754	Glutaredoxin-1	GLRX
26.0183	27.3619	24.8226	26.2777	27.2068	27.0871			0.427399	1	-0.789589	-1.00031	0	P35813;E9PKB5;E9PJN3;E9PL75	P35813;E9PKB5	Protein phosphatase 1A	PPM1A
28.8229	28.7375	25.1191	28.9652	29.3215	29.1844			0.581267	0.828205	-1.59724	-1.30384	0	P35914;H0Y2L7;G5E9S9;B7Z4D4;B7Z212;Q8TB92	P35914	Hydroxymethylglutaryl-CoA lyase, mitochondrial	HMGCL
27.9441	28.8817	27.2019	27.9009	28.0059	28.0341			0.0197562	1	0.0289396	0.0593382	0	P36405	P36405	ADP-ribosylation factor-like protein 3	ARL3
29.0789	28.7191	28.9922	29.2774	29.2499	29.0723			1.00438	0.321243	-0.269786	-2.14082	0	P36507;G5E9C7;A0A1B0GUL7;M0R1B6	P36507;G5E9C7	Dual specificity mitogen-activated protein kinase kinase 2	MAP2K2
29.1424	28.6625	29.0625	28.7967	29.2615	28.981			0.102537	1	-0.057244	-0.285126	0	P36542	P36542	ATP synthase subunit gamma, mitochondrial	ATP5C1
29.0495	29.6658	26.3897	29.0061	28.9903	28.56			0.181286	1	-0.483751	-0.476254	0	P36551;H0YA22;D6RER6	P36551	Oxygen-dependent coproporphyrinogen-III oxidase, mitochondrial	CPOX
32.0775	32.3217	30.5291	31.894	31.8313	31.924			0.160607	1	-0.240367	-0.427737	0	P36578;H3BM89;H3BTP7;H3BU31	P36578;H3BM89	60S ribosomal protein L4	RPL4
28.1778	28.4947	27.8901	28.0323	27.6859	28.1486			0.446835	1	0.231914	1.03918	0	P36915;A0A140T8Y2;A2AB27	P36915;A0A140T8Y2	Guanine nucleotide-binding protein-like 1	GNL1
28.6225	29.3882	28.0555	28.9845	29.0217	29.2113			0.416172	1	-0.383763	-0.977762	0	P36952;C9JLM5	P36952	Serpin B5	SERPINB5
29.6625	29.374	28.6536	29.7789	29.469	29.6662			0.580266	0.829815	-0.408009	-1.30189	0	P36957;Q86SW4;H0YJF9;G3V5M3;G3V3F0	P36957	Dihydrolipoyllysine-residue succinyltransferase component of 2-oxoglutarate dehydrogenase complex, mitochondrial	DLST
27.8436	28.559	27.1774	28.1732	28.2828	28.5449			0.499877	0.960118	-0.473601	-1.14431	0	P37198;M0QXN5;M0QX10;M0QYY0;M0QX13;M0QZL5;M0R1S1;M0QX64;M0R302	P37198;M0QXN5	Nuclear pore glycoprotein p62	NUP62
30.6834	30.9758	30.521	31.0144	31.1923	31.3645			1.30025	0.19716	-0.463668	-2.77468	0	P37802;X6RJP6;C9J5W6;Q9UI15	P37802;X6RJP6	Transgelin-2	TAGLN2
31.6962	31.2023	31.7458	31.8334	31.8957	31.7135			0.664394	0.68789	-0.266099	-1.46582	0	P37837;F2Z393;E9PM01;E9PKI8	P37837;F2Z393	Transaldolase	TALDO1
30.5916	30.3459	29.1343	30.5933	30.6506	30.4136			0.507309	0.94918	-0.528547	-1.15895	0	P38117;M0QY67	P38117;M0QY67	Electron transfer flavoprotein subunit beta	ETFB
30.2406	29.7498	29.2146	30.6944	30.5996	30.4625			1.31113	0.189689	-0.850484	-2.79921	0	P38159;H0Y6E7;H3BT71;H3BUY5;H3BR27;H3BNC1;O75526;Q8IZ40;Q8N7X1	P38159;H0Y6E7;H3BT71	RNA-binding motif protein, X chromosome;RNA-binding motif protein, X chromosome, N-terminally processed	RBMX
29.1989	29.5411	28.4034	28.9011	28.914	29.244			0.0265431	1	0.028115	0.0791531	0	P38606;C9JA17;C9JVW8	P38606	V-type proton ATPase catalytic subunit A	ATP6V1A
30.071	30.2708	29.8049	30.1169	30.1151	30.2092			0.286198	1	-0.0981922	-0.709162	0	P38919;I3L3H2;J3QQP0;E9PBH4;F8WE11;C9JUF0	P38919;I3L3H2	Eukaryotic initiation factor 4A-III;Eukaryotic initiation factor 4A-III, N-terminally processed	EIF4A3
30.3221	29.7342	29.87	30.5991	30.5123	30.8781			1.51892	0.140414	-0.687754	-3.2879	0	P39019;M0R2L9;M0QYF7;M0R140;A0A075B6E2	P39019;M0R2L9;M0QYF7;M0R140	40S ribosomal protein S19	RPS19
30.3316	30.5936	30.4366	30.8918	30.9602	30.8053			2.09089	0.0520833	-0.431826	-4.88835	0	P39023;G5E9G0;H7C422;H7C3M2;B5MCW2;F8WCR1;Q92901	P39023;G5E9G0;H7C422;H7C3M2;B5MCW2	60S ribosomal protein L3	RPL3
29.7281	29.7782	28.9806	29.9975	29.9421	29.8764			0.785262	0.493519	-0.443039	-1.70205	0	P39748;I3L3E9;F5H1Y3	P39748;I3L3E9	Flap endonuclease 1	FEN1
31.0819	31.7592	29.9595	31.3327	31.3766	31.3783			0.337505	1	-0.429012	-0.817141	0	P40121;E7ENU9;B8ZZL6;H7C0X8	P40121;E7ENU9	Macrophage-capping protein	CAPG
26.4143	26.5067	26.8733	27.4622	27.6591	27.5354	+	3ha_huvec	2.48854	0.0175385	-0.95416	-6.29878	0	P40222	P40222	Alpha-taxilin	TXLNA
31.036	31.3203	30.415	31.361	31.5991	31.4686			0.935814	0.363702	-0.552462	-2.00143	0	P40227;J3KRI6	P40227	T-complex protein 1 subunit zeta	CCT6A
30.345	30.0345	29.784	30.0518	30.0509	30.4374			0.238794	1	-0.125559	-0.606299	0	P40429;A0A7I2V5L3;A0A7I2V2L9;M0QYS1;Q8J015;Q6NVV1;M0QZU1;A0A096LPE0	P40429;A0A7I2V5L3;A0A7I2V2L9;M0QYS1;Q8J015;Q6NVV1	60S ribosomal protein L13a;Putative 60S ribosomal protein L13a protein RPL13AP3	RPL13A;RPL13a;RPL13AP3
26.4893	25.2758	25.5285	26.3091	26.9792	26.5919			0.967164	0.338975	-0.862237	-2.06488	0	P40818;A0A075B720	P40818;A0A075B720	Ubiquitin carboxyl-terminal hydrolase 8	USP8
31.987	32.1534	31.1011	32.0661	32.053	32.4133			0.548183	0.897482	-0.430323	-1.23918	0	P40925;B9A041;A0A5K1VW95;B8ZZ51;C9JF79;C9JRL4;C9JLV6	P40925;B9A041;A0A5K1VW95;B8ZZ51	Malate dehydrogenase, cytoplasmic	MDH1
32.5166	33.2616	32.2321	32.4602	32.7001	32.7059			0.0520415	1	0.0480258	0.151289	0	P40926;G3XAL0	P40926;G3XAL0	Malate dehydrogenase, mitochondrial;Malate dehydrogenase	MDH2
27.1918	28.1813	26.7184	27.4219	26.8956	26.7961			0.277053	1	0.325939	0.689575	0	P40937;F5H5S0;F5H304;E9PEP3;C9JH72;F5H0U6	P40937	Replication factor C subunit 5	RFC5
31.2802	30.9855	30.2429	30.968	30.9368	30.9467			0.136667	1	-0.114299	-0.370178	0	P41091;Q2VIR3;H7BZU1	P41091;Q2VIR3	Eukaryotic translation initiation factor 2 subunit 3;Putative eukaryotic translation initiation factor 2 subunit 3-like protein	EIF2S3;EIF2S3L
26.5842	26.8601	25.1253	26.8612	26.9008	26.429			0.410773	1	-0.540504	-0.966888	0	P41223;C9JCD9;F8WCN7	P41223;C9JCD9	Protein BUD31 homolog	BUD31
27.5678	27.2989	26.7322	27.4529	27.4263	28.3047			0.626955	0.754605	-0.528315	-1.39291	0	P41227;F8W808;A8MWP7;C9JN83;C9JW55;Q9BSU3;H0Y8T0	P41227;F8W808;A8MWP7;C9JN83	N-alpha-acetyltransferase 10	NAA10
28.2287	28.4391	26.7794	27.8072	27.315	27.6558			0.153955	1	0.223097	0.411901	0	P41236;E7EMN6;Q6NXS1;E7EUI7	P41236;E7EMN6;Q6NXS1;E7EUI7	Protein phosphatase inhibitor 2;Protein phosphatase inhibitor 2-like protein 3	PPP1R2;PPP1R2P3
27.492	28.1308	27.2845	27.6838	27.64	27.6033			0.00848997	1	-0.00660197	-0.0258156	0	P41240;H3BUM9;H3BN15;H3BU69;K7ENL8;K7ES68;K7EQY5;P42679	P41240;H3BUM9	Tyrosine-protein kinase CSK	CSK
29.2942	29.9286	28.6971	29.4437	29.5018	29.2173			0.0779472	1	-0.0809943	-0.221289	0	P41250;A0A6Q8PGZ8;A0A6Q8PGA8;A0A6Q8PGI6;A0A6Q8PHH9;A0A6Q8PGW4;A0A6Q8PHI7;A0A6Q8PFZ6;H7C443;A0A6Q8PF45;A0A6Q8PH49;A0A6Q8PGN7;F8WCK4;A0A6Q8PGZ9;A0A6Q8PFV5;A0A6Q8PGT3;A0A6Q8PFU7;A0A6Q8PFN0	P41250;A0A6Q8PGZ8;A0A6Q8PGA8;A0A6Q8PGI6;A0A6Q8PHH9;A0A6Q8PGW4;A0A6Q8PHI7;A0A6Q8PFZ6;H7C443	Glycine--tRNA ligase	GARS
29.5489	30.0318	28.5962	29.3985	29.3563	29.4919			0.0182277	1	-0.0232334	-0.0548372	0	P41252;A0A804HL54;A0A804HJN6;A0A0A0MSX9;A0A804HHW9;J3KR24;A0A804HJ36;A0A804HIV9;A0A804HKU1;A0A804HK69;A0A804HIG2;A0A804HKW6;A0A0D9SFC1	P41252;A0A804HL54;A0A804HJN6;A0A0A0MSX9;A0A804HHW9;J3KR24;A0A804HJ36;A0A804HIV9;A0A804HKU1;A0A804HK69	Isoleucine--tRNA ligase, cytoplasmic	IARS
27.5654	27.7858	25.3206	27.7831	27.5865	27.6235			0.417089	1	-0.773784	-0.979605	0	P41743	P41743	Protein kinase C iota type	PRKCI
27.5329	28.143	27.4565	27.8704	28.4857	28.139			0.741956	0.538817	-0.454271	-1.61716	0	P42025	P42025	Beta-centractin	ACTR1B
29.1657	29.8572	27.142	29.4681	29.3125	29.1169			0.283526	1	-0.577506	-0.703452	0	P42126;Q96DC0;H3BS70	P42126;Q96DC0;H3BS70	Enoyl-CoA delta isomerase 1, mitochondrial	ECI1;DCI
30.3005	30.1693	29.0336	30.1812	30.2665	30.0957			0.356063	1	-0.346675	-0.855504	0	P42166	P42166	Lamina-associated polypeptide 2, isoform alpha;Thymopoietin;Thymopentin	TMPO
27.7692	28.1193	25.4894	28.2305	27.8699	27.9842			0.470018	0.984532	-0.902235	-1.08528	0	P42167;G5E972;H0YJH7	P42167;G5E972	Lamina-associated polypeptide 2, isoforms beta/gamma;Thymopoietin;Thymopentin	TMPO
29.3774	29.8289	28.8721	29.3732	29.3454	29.4529			0.0378686	1	-0.0310542	-0.111625	0	P42285;H0YAC4;H0Y8U3	P42285	Superkiller viralicidic activity 2-like 2	SKIV2L2
27.3834	28.071	24.383	27.5686	26.83	27.3567			0.215456	1	-0.639318	-0.554308	0	P42345;B1AKP8;B1AKQ2	P42345	Serine/threonine-protein kinase mTOR	MTOR
30.6539	30.3844	25.7304	30.7634	30.8939	31.6079			0.598318	0.794557	-2.16549	-1.3371	0	P42677	P42677	40S ribosomal protein S27	RPS27
29.0869	29.4693	28.4536	29.0871	29.4555	29.3731			0.404408	1	-0.301981	-0.954043	0	P42765;A0A0B4J2A4;K7EME0;K7EJB1;K7EJ68;K7ER88	P42765;A0A0B4J2A4;K7EME0	3-ketoacyl-CoA thiolase, mitochondrial	ACAA2
29.9701	30.4837	24.6653	30.285	30.2571	30.6868			0.473438	0.979852	-2.03663	-1.09206	0	P42766;F2Z388	P42766;F2Z388	60S ribosomal protein L35	RPL35
25.1686	25.5719	25.3442	26.4719	26.1562	26.7686	+	3ha_huvec	2.18912	0.0443243	-1.10401	-5.21046	0	P43405	P43405	Tyrosine-protein kinase SYK	SYK
31.6892	31.3335	31.3401	31.9638	31.9762	32.1032			1.95151	0.0756552	-0.560137	-4.45757	0	P43487;C9JJ34;F6WQW2;C9JXG8;C9JGV6;C9JDM3;C9JIC6	P43487;C9JJ34;F6WQW2;C9JXG8;C9JGV6	Ran-specific GTPase-activating protein	RANBP1
29.7236	29.8256	29.2357	29.804	30.2002	30.0204			0.896017	0.382443	-0.413228	-1.9215	0	P43686	P43686	26S protease regulatory subunit 6B	PSMC4
28.3525	28.575	27.7831	28.4378	28.6432	28.4666			0.498557	0.957717	-0.279024	-1.14171	0	P43897;C9JT21;C9JG32;F8VPA7;F8VS27	P43897;C9JT21	Elongation factor Ts, mitochondrial;Elongation factor Ts	TSFM
28.2949	28.5378	27.9653	28.309	28.1314	28.7488			0.203451	1	-0.130407	-0.527165	0	P45954	P45954	Short/branched chain specific acyl-CoA dehydrogenase, mitochondrial	ACADSB
28.2007	28.9163	26.0223	28.3957	28.806	28.4593			0.4052	1	-0.840548	-0.955644	0	P45973;F8VNY3	P45973	Chromobox protein homolog 5	CBX5
29.7491	30.0719	29.2353	29.8558	29.6277	29.9647			0.190093	1	-0.130625	-0.496612	0	P45974;A0A7P0TB18;F5H571	P45974	Ubiquitin carboxyl-terminal hydrolase 5	USP5
27.2569	27.8111	24.4172	27.1487	27.0152	27.1216			0.222657	1	-0.60011	-0.570457	0	P45985;R4GN37	P45985	Dual specificity mitogen-activated protein kinase kinase 4	MAP2K4
29.039	29.3656	28.7459	28.8828	29.1097	29.2793			0.0662924	1	-0.0404421	-0.190172	0	P46060;H0Y4Q3;B0QYT5;B0QYT4;B0QYT6	P46060	Ran GTPase-activating protein 1	RANGAP1
27.7373	27.9344	26.9047	27.8145	28.0266	28.085			0.62012	0.759493	-0.449867	-1.37959	0	P46063;F8WA66;F8WD97;F5H2L2;F5H4P4;F5H3W0;F5GYB7	P46063	ATP-dependent DNA helicase Q1	RECQL
27.8566	28.5165	27.4371	27.8791	27.9773	27.8851			0.0242686	1	0.0229073	0.0725433	0	P46087;F5H5X6;F5GWB7;F5H709;F5GYR3;F5H359;F5H8G6	P46087	Probable 28S rRNA (cytosine(4447)-C(5))-methyltransferase	NOP2
28.295	29.2354	27.1531	28.2549	28.1532	28.6166			0.0639789	1	-0.113715	-0.183924	0	P46108;I3L297	P46108	Adapter molecule crk	CRK
28.7437	29.1158	27.0348	28.3012	28.7008	28.661			0.145799	1	-0.256271	-0.392323	0	P46109	P46109	Crk-like protein	CRKL
27.1213	27.6531	24.3769	27.2147	27.3573	26.832			0.296474	1	-0.750888	-0.731041	0	P46736;X6RJS7;A0A087WZR3;H9KVA9;A0A0D9SF50;A0A0A0MS96	P46736;X6RJS7;A0A087WZR3;H9KVA9;A0A0D9SF50	Lys-63-specific deubiquitinase BRCC36	BRCC3
30.6271	29.8023	30.2988	31.3138	31.3446	30.6591			1.2365	0.21737	-0.86307	-2.63289	0	P46778;G3V1B3;M0R181	P46778;G3V1B3;M0R181	60S ribosomal protein L21	RPL21
29.4446	29.3704	28.9832	29.4819	29.4138	29.3813			0.473785	0.98111	-0.159626	-1.09275	0	P46781;B5MCT8;C9JM19;F2Z3C0;A8MXK4	P46781;B5MCT8;C9JM19	40S ribosomal protein S9	RPS9
30.4068	30.9886	29.2245	30.2848	30.0818	30.3233			0.014747	1	-0.0233517	-0.0445333	0	P46783;A0A2R8Y6L3;F6U211;A0A2R8Y7H1;A0A2R8YFH6;S4R435;Q9NQ39	P46783;A0A2R8Y6L3;F6U211;A0A2R8Y7H1;A0A2R8YFH6;S4R435;Q9NQ39	40S ribosomal protein S10;Putative 40S ribosomal protein S10-like	RPS10;RPS10-NUDT3;RPS10P5
29.577	30.2406	28.1518	29.6491	29.652	29.8261			0.246606	1	-0.385916	-0.623491	0	P46926;D6RAY7;D6R9P4;D6RFF8;D6RB13;D6R917;V9GYK3;D6RFK5;V9GYW0	P46926;D6RAY7;D6R9P4;D6RFF8;D6RB13	Glucosamine-6-phosphate isomerase 1;Glucosamine-6-phosphate isomerase	GNPDA1
28.0533	28.6737	27.47	28.2788	28.3052	28.5464			0.362872	1	-0.311114	-0.869499	0	P46937;H0YCI3	P46937;H0YCI3	Transcriptional coactivator YAP1	YAP1
27.1911	27.6676	26.8895	27.2139	27.4902	27.2907			0.124857	1	-0.082222	-0.341173	0	P46939;Q5T097;Q5T098	P46939	Utrophin	UTRN
31.2679	31.6426	30.8777	31.5154	31.4539	31.7142			0.565545	0.862748	-0.298375	-1.27314	0	P46940;A0A0J9YXZ5;H0YLE8;H0YKA5;A0A087X225;A0A087WWP1	P46940;A0A0J9YXZ5;H0YLE8	Ras GTPase-activating-like protein IQGAP1	IQGAP1
26.3425	27.4068	27.2727	27.1586	27.3912	27.5099			0.421089	1	-0.34589	-0.987647	0	P46977;A0A0C4DH80;E9PN73;E9PI32	P46977	Dolichyl-diphosphooligosaccharide--protein glycosyltransferase subunit STT3A	STT3A
30.4954	30.645	29.2211	30.6597	30.4162	30.6142			0.410876	1	-0.442841	-0.967095	0	P47755;F8W9N7;A0A0D9SET8;C9JUG7;F8WED3	P47755;F8W9N7;A0A0D9SET8;C9JUG7	F-actin-capping protein subunit alpha-2	CAPZA2
28.5909	27.8104	27.046	28.6786	29.1482	29.1988			1.17879	0.244635	-1.19275	-2.50721	0	P47813;O14602;X6RAC9;A6NJH9	P47813;O14602;X6RAC9;A6NJH9	Eukaryotic translation initiation factor 1A, X-chromosomal;Eukaryotic translation initiation factor 1A, Y-chromosomal	EIF1AX;EIF1AY
30.2687	30.746	29.2636	30.2526	30.2959	30.0774			0.0935695	1	-0.115842	-0.262116	0	P47897;A0A1B0GVU9;B4DDN1;H7C0R3;A0A0U1RQT0;C9J165;A0A0U1RQE9;A0A0U1RRI9;A0A0U1RQM8;A0A0U1RQQ5;A0A0U1RQL2;A0A0U1RQU2;A0A1B0GTT3;A0A0U1RQX5;A0A0U1RR66;A0A0U1RRC8;A0A0U1RQX9;F2Z2V6;A0A0U1RQJ6;A0A0U1RRJ7;A0A0U1RR79;A0A0U1RQC3	P47897;A0A1B0GVU9;B4DDN1	Glutamine--tRNA ligase	QARS
26.5278	28.2093	27.3599	28.0844	27.8385	28.2464			0.621492	0.762959	-0.690702	-1.38226	0	P47929	P47929	Galectin-7	LGALS7
29.9198	30.713	27.6557	30.0804	30.0506	30.0158			0.270807	1	-0.619445	-0.67613	0	P47985;P0C7P4	P47985;P0C7P4	Cytochrome b-c1 complex subunit Rieske, mitochondrial;Cytochrome b-c1 complex subunit 11;Putative cytochrome b-c1 complex subunit Rieske-like protein 1	UQCRFS1;UQCRFS1P1
30.0263	30.2201	29.3071	29.498	29.5982	29.9129			0.234087	1	0.181471	0.595893	0	P48047;A0A494C0K9;H7C0C1;H7C068;H7C086	P48047;A0A494C0K9;H7C0C1	ATP synthase subunit O, mitochondrial	ATP5O
27.7117	28.153	27.5092	28.3111	27.6055	27.9949			0.255292	1	-0.17916	-0.642487	0	P48059;A0A0J9YXC7;A0A0M3HER1;Q7Z4I7;H0Y592	P48059;A0A0J9YXC7;A0A0M3HER1	LIM and senescent cell antigen-like-containing domain protein 1	LIMS1
28.6995	29.4067	27.3858	29.1181	29.1015	28.9872			0.408886	1	-0.571593	-0.963083	0	P48147;A0A499FJL1	P48147;A0A499FJL1	Prolyl endopeptidase	PREP
28.2937	28.9314	26.5746	28.071	29.006	28.6914			0.362421	1	-0.656211	-0.868572	0	P48163	P48163	NADP-dependent malic enzyme	ME1
27.6345	27.2026	24.9132	27.8305	27.5388	27.6801			0.577242	0.836577	-1.09972	-1.29598	0	P48436;A6PVD3;P57073;P56693	P48436	Transcription factor SOX-9	SOX9
29.7542	29.891	28.6388	29.744	29.3108	29.498			0.0757248	1	-0.0895958	-0.215401	0	P48444;B0YIW6;Q6P1Q5;E9PK34	P48444;B0YIW6	Coatomer subunit delta	ARCN1
27.8037	28.2035	25.5614	27.8885	28.4663	28.3765			0.555096	0.893379	-1.05426	-1.25271	0	P48449;A0A0G2JQD0;C9J315;A0A0G2JS81	P48449;A0A0G2JQD0	Lanosterol synthase	LSS
28.6003	29.4004	28.4113	28.7996	28.8826	28.9566			0.0875629	1	-0.075566	-0.246533	0	P48506;A0A2R8YEL6;B4E2I4;E1CEI4;A0A0C4DGB2;A0A2R8Y648;D6RGF8	P48506;A0A2R8YEL6;B4E2I4;E1CEI4;A0A0C4DGB2;A0A2R8Y648	Glutamate--cysteine ligase catalytic subunit	GCLC
27.5239	28.0525	26.2497	25.7723	26.9039	27.556			0.287235	1	0.531303	0.711377	0	P48507	P48507	Glutamate--cysteine ligase regulatory subunit	GCLM
29.2911	29.801	27.4757	29.4446	29.0774	29.3541			0.240753	1	-0.436124	-0.61062	0	R4GMR5;P48556;K7EJR3;K7EJC1;K7ERW6	R4GMR5;P48556;K7EJR3;K7EJC1	26S proteasome non-ATPase regulatory subunit 8	PSMD8
27.8669	27.3194	27.1407	27.6186	27.7052	27.4311			0.241486	1	-0.142609	-0.612236	0	P48634	P48634	Protein PRRC2A	PRRC2A
29.1778	29.663	28.5914	29.3394	29.2605	29.1147			0.107265	1	-0.0941156	-0.297141	0	P48637;A0A2R8Y430;A0A2R8Y5T7;A0A2R8Y7I7;A0A2R8YF34;A0A2R8Y6Q7;A0A2R8Y2X9;A0A2R8Y6Y6;A0A2R8Y4V9;A0A2R8Y790;A0A2R8Y446;A0A0S2Z4J7;A0A2R8Y2F2	P48637;A0A2R8Y430;A0A2R8Y5T7	Glutathione synthetase	GSS
30.5012	30.3202	30.2896	30.7416	30.6588	30.7155			2.04936	0.06648	-0.334969	-4.75688	0	P48643;B7ZAR1;E9PCA1;E7ENZ3;D6RIZ7;H0Y914	P48643;B7ZAR1;E9PCA1;E7ENZ3	T-complex protein 1 subunit epsilon	CCT5
29.3835	29.9385	27.1917	29.3574	29.3842	29.7584			0.319861	1	-0.662104	-0.780348	0	P48735;H0YL11	P48735	Isocitrate dehydrogenase [NADP], mitochondrial	IDH2
28.1504	28.3594	27.8637	29.3566	29.1046	29.1017	+	3ha_huvec	2.50874	0.01392	-1.0631	-6.37853	0	P49006	P49006	MARCKS-related protein	MARCKSL1
29.3971	29.6829	28.9172	29.7227	29.7278	29.8948			0.910133	0.373925	-0.449341	-1.94977	0	P49189	P49189	4-trimethylaminobutyraldehyde dehydrogenase	ALDH9A1
27.8755	26.5746	24.8922	27.8495	28.28	28.3419			0.909616	0.373866	-1.70971	-1.94874	0	P49247	P49247	Ribose-5-phosphate isomerase	RPIA
29.2031	29.601	27.953	29.3743	29.6847	29.4465			0.504555	0.949598	-0.582812	-1.15353	0	P49257	P49257	Protein ERGIC-53	LMAN1
29.1851	29.2411	28.7609	29.3256	29.3347	29.7801			0.914546	0.376342	-0.417725	-1.95863	0	P49321;Q5T624;H0YF33;H0YDS9;E9PRH9;E9PI86;E9PPR5;E9PPQ8	P49321;Q5T624;H0YF33	Nuclear autoantigenic sperm protein	NASP
31.0147	31.4222	30.0208	31.1023	31.0866	31.0074			0.231473	1	-0.246214	-0.590096	0	P49327;A0A0U1RQF0;A0A0U1RRG3;A0A1B0GTR5;J3KTF0	P49327;A0A0U1RQF0	Fatty acid synthase;[Acyl-carrier-protein] S-acetyltransferase;[Acyl-carrier-protein] S-malonyltransferase;3-oxoacyl-[acyl-carrier-protein] synthase;3-oxoacyl-[acyl-carrier-protein] reductase;3-hydroxyacyl-[acyl-carrier-protein] dehydratase;Enoyl-[acyl-carrier-protein] reductase;Oleoyl-[acyl-carrier-protein] hydrolase	FASN
32.1589	32.4326	29.8092	32.1544	32.0661	32.126			0.319031	1	-0.648586	-0.77861	0	P49368;B4DUR8;E9PRC8;Q5SZX6;E9PQ35;E9PM09;Q5SZW8;Q5SZX9	P49368;B4DUR8	T-complex protein 1 subunit gamma	CCT3
26.5332	26.7117	25.3613	25.9252	25.6706	25.5255			0.490923	0.960676	0.494997	1.12664	0	P49406;S4R3W9;A0A0A0MRF4;S4R455;H7C2J0	P49406;S4R3W9;A0A0A0MRF4	39S ribosomal protein L19, mitochondrial	MRPL19
27.8377	27.8466	25.0131	27.878	27.8486	27.8266			0.431898	1	-0.951955	-1.00933	0	P49407;E9PM35;E7ESX4;P10523	P49407;E9PM35	Beta-arrestin-1	ARRB1
31.6331	31.5799	31.4069	31.6875	31.8108	32.0527			1.148	0.248462	-0.310331	-2.44112	0	P49411;H3BNU3	P49411	Elongation factor Tu, mitochondrial	TUFM
26.4005	27.2281	25.5162	27.1019	26.348	26.6136			0.220502	1	-0.306197	-0.565634	0	P49441;C9J173;B8ZZF6;E7ET59;E7EUX4;E7ENF2;C9J128;C9J2Z6	P49441;C9J173;B8ZZF6;E7ET59;E7EUX4;E7ENF2	Inositol polyphosphate 1-phosphatase	INPP1
30.1041	30.2943	28.9688	29.6992	29.8405	30.1164			0.0786902	1	-0.0963472	-0.223254	0	P49458;Q6P2S0;Q659G3;E9PE20	P49458;Q6P2S0;Q659G3;E9PE20	Signal recognition particle 9 kDa protein	SRP9;DKFZp564M2223
28.7519	28.945	27.4875	28.7675	28.7309	28.5486			0.246089	1	-0.287565	-0.622356	0	P49589;B4DKY1;E9PRS8;C9JLN0	P49589;B4DKY1	Cysteine--tRNA ligase, cytoplasmic	CARS
30.6027	31.1072	29.8788	30.1766	30.4039	30.3254			0.248458	1	0.227585	0.627551	0	Q5T5C7;P49591	Q5T5C7;P49591	Serine--tRNA ligase, cytoplasmic	SARS
30.9829	31.5107	30.0038	31.4604	31.2932	31.1237			0.435992	1	-0.459949	-1.01752	0	P49720;A0A087WXQ8;A0A087WY10;A0A087WUL2	P49720;A0A087WXQ8;A0A087WY10;A0A087WUL2	Proteasome subunit beta type-3	PSMB3
30.0426	29.7397	29.3781	30.3766	30.8266	30.0663			1.12998	0.255056	-0.703053	-2.40276	0	P49721;A0A087WVV1	P49721;A0A087WVV1	Proteasome subunit beta type-2	PSMB2
28.596	29.1575	28.0584	28.8351	28.6471	28.8917			0.224758	1	-0.187382	-0.575149	0	P49736;H0Y8E6;F8WDM3	P49736;H0Y8E6	DNA replication licensing factor MCM2	MCM2
30.1052	30.6329	29.1572	30.3861	30.5132	30.5316			0.517517	0.942721	-0.511853	-1.17903	0	P49748;G3V1M7;J3QRJ8;K7EQP4;J3KSR4;J3QKU9;K7EJW8;J3KS89;K7EMF8	P49748	Very long-chain specific acyl-CoA dehydrogenase, mitochondrial	ACADVL
27.0556	27.7734	27.5079	27.5617	28.0663	27.7162			0.581952	0.826	-0.335772	-1.30518	0	P49750;F8VU51;H0YIQ2;H0YI23	P49750;F8VU51;H0YIQ2	YLP motif-containing protein 1	YLPM1
28.2555	28.1428	24.3438	26.9523	28.6478	27.7198			0.247091	1	-0.859259	-0.624554	0	P49755;G3V2K7	P49755;G3V2K7	Transmembrane emp24 domain-containing protein 10	TMED10
28.0553	28.1205	27.4571	28.5078	27.7112	28.2908			0.387271	1	-0.292318	-0.919324	0	P49756;E9PQU5;H0YE46;E9PSE8	P49756	RNA-binding protein 25	RBM25
26.5825	27.2449	27.0798	27.1644	27.0264	27.0623			0.221201	1	-0.115327	-0.567199	0	P49770;H0YJJ8;G3V5E5;H0YK01	P49770	Translation initiation factor eIF-2B subunit beta	EIF2B2
29.5581	29.6336	28.6001	29.3276	29.9356	29.2013			0.2167	1	-0.224243	-0.557104	0	P49773;D6REP8;D6RE99;H0YC49;D6RD60;A0A6Q8PGQ8;D6RC06	P49773;D6REP8;D6RE99;H0YC49;D6RD60;A0A6Q8PGQ8	Histidine triad nucleotide-binding protein 1	HINT1
26.9517	27.1456	26.8933	26.7701	27.0265	27.1971			0.00239389	1	-0.00106748	-0.00732938	0	P49790	P49790	Nuclear pore complex protein Nup153	NUP153
28.49	28.9051	27.9774	28.5175	28.5128	28.7108			0.167909	1	-0.122869	-0.444991	0	P49792;F8W705;F8WBP7;H0YBN8;C9J6W1	P49792	E3 SUMO-protein ligase RanBP2	RANBP2
26.5104	27.5674	26.7161	26.9666	26.9839	27.3659			0.191337	1	-0.174222	-0.499474	0	P49841;A0A7I2YQK0;A0A3B3ITW1;A0A7I2V3J4;A0A7I2V4F3;A0A7I2V3D8;A0A7I2V441;A0A7I2V2V4;A0A7I2V5G5;A0A7I2V5K9;A0A7I2V3G9;A0A7I2V3T3;A0A7I2V4X2;A0A7I2V589;A0A7I2YQ81;A0A7I2V511;A0A7I2V3N7;A0A7I2V2P8;A0A7I2V3Z5;A0A7I2V4X3;A0A7I2YQG6;A0A7I2V2Y0;A0A7I2YQU1;A0A7I2V2K7;A0A7I2YQB0;A0A7I2V5B3;A0A7I2V2I5;A0A7I2V606;A0A7I2V2U4;A0A7I2V2N4;A0A7I2V4W7	P49841;A0A7I2YQK0;A0A3B3ITW1	Glycogen synthase kinase-3 beta	GSK3B
27.1817	28.7226	26.663	27.3003	27.277	27.1439			0.171984	1	0.282012	0.45456	0	P49903;Q5T5U6;Q5T5U7	P49903	Selenide, water dikinase 1	SEPHS1
28.712	28.8478	27.2953	28.4765	28.6478	28.4393			0.179377	1	-0.236178	-0.47182	0	P49915	P49915	GMP synthase [glutamine-hydrolyzing]	GMPS
29.0433	28.1779	25.5916	28.7585	28.3887	28.9058			0.442435	1	-1.08008	-1.0304	0	P50213;H0YL72;H0YMU3;H0YLI6;H0YKD0;H0YNF5;H0YM64;H0YM46	P50213;H0YL72;H0YMU3;H0YLI6	Isocitrate dehydrogenase [NAD] subunit alpha, mitochondrial	IDH3A
31.3448	31.494	30.276	31.4245	31.5055	31.495			0.495735	0.960111	-0.436741	-1.13614	0	P50395;Q5SX87;V9GYF8;Q5SX90;Q5SX91;V9GYJ7;Q5SX86	P50395	Rab GDP dissociation inhibitor beta	GDI2
27.3022	27.1946	26.9181	27.5153	27.8417	28.0156			1.60722	0.134821	-0.652557	-3.50853	0	P50402;A0A804HIV7;Q5HY57;A0A804HLA2	P50402;A0A804HIV7;Q5HY57;A0A804HLA2	Emerin	EMD
28.1086	28.5216	27.0354	28.435	28.5091	27.9855			0.374021	1	-0.421333	-0.892327	0	P50416;H3BMD2;H3BUJ0;H3BP22;H3BUV7	P50416	Carnitine O-palmitoyltransferase 1, liver isoform	CPT1A
27.1357	27.7488	24.3565	26.8347	26.2498	26.5368			0.0408031	1	-0.126794	-0.119923	0	P50453	P50453	Serpin B9	SERPINB9
29.8489	30.5145	28.2867	29.8078	29.729	29.8026			0.127508	1	-0.229744	-0.347721	0	P50454;E9PJH8;E9PPV6;E9PR70;E9PK86;E9PMI5;E9PKH2;E9PNX1;E9PIG2;E9PRS3;E9PQ34;E9PLA6;H0YEP8	P50454;E9PJH8;E9PPV6;E9PR70;E9PK86;E9PMI5	Serpin H1	SERPINH1
31.0829	31.5403	30.1221	31.0197	31.2607	31.0877			0.18703	1	-0.207578	-0.489551	0	P50502;H7C3I1;Q3KNR6;F6VDH7;Q8IZP2;Q8NFI4;F8WAQ7	P50502;H7C3I1;Q3KNR6;F6VDH7;Q8IZP2;Q8NFI4	Hsc70-interacting protein;Putative protein FAM10A4;Putative protein FAM10A5	ST13;ST13P4;ST13P5
29.6192	29.5215	28.7333	29.377	29.6356	29.8634			0.459751	0.997255	-0.334026	-1.06489	0	P50552;K7ENL7;K7ENR7;K7EIG8;K7EM16;K7EQD0	P50552	Vasodilator-stimulated phosphoprotein	VASP
29.6967	29.772	28.6728	29.5382	29.2893	29.3783			0.019716	1	-0.0214322	-0.0592203	0	P50570;E5RHK8;Q9UQ16;E5RIK2;K7EMQ3;K7EPK9;K7ENE7	P50570	Dynamin-2	DNM2
29.3527	30.1284	28.5093	29.2837	29.5293	29.6474			0.11899	1	-0.156656	-0.326602	0	P50579;F8VRR3;F8VQZ7;G3V1U3;F8VY03;F8VSC4;F8VZX9	P50579;F8VRR3;F8VQZ7;G3V1U3	Methionine aminopeptidase 2	METAP2
28.9343	29.4329	28.1138	29.3305	29.3945	29.6582			0.730805	0.554928	-0.634044	-1.59535	0	P50895;A0A087WXM8;K7ENU8;K7ERB7	P50895;A0A087WXM8;K7ENU8	Basal cell adhesion molecule	BCAM
31.065	30.848	30.5251	31.3331	31.3506	30.964			0.936798	0.363161	-0.403152	-2.00341	0	P50990;H7C4C8;H7C2U0	P50990	T-complex protein 1 subunit theta	CCT8
31.3096	31.4202	31.3214	31.6257	31.8052	31.4132			1.04681	0.304195	-0.264298	-2.22828	0	P50991	P50991	T-complex protein 1 subunit delta	CCT4
29.6388	30.148	28.2751	29.723	29.8388	29.7471			0.301662	1	-0.415686	-0.742034	0	P50995;H0Y6E1;E5RIN3;P27216	P50995	Annexin A11	ANXA11
28.274	28.6845	25.4218	27.9118	27.9367	28.1301			0.199461	1	-0.532752	-0.518078	0	P51116;I3L1Z2	P51116	Fragile X mental retardation syndrome-related protein 2	FXR2
28.4245	28.6988	27.1384	28.693	29.0146	28.386			0.521912	0.934678	-0.610572	-1.18767	0	P51148;K7ERI8;K7ERQ8;F8VVK3;K7ENY4;F8VVZ0;F8VUA5;F8VWU4;K7EIP6;F8WCY6;F8WD79;F8VPW9;F8VSF8;F8VWZ7	P51148;K7ERI8;K7ERQ8;F8VVK3;K7ENY4	Ras-related protein Rab-5C	RAB5C
29.6516	29.8908	28.6959	29.8525	30.1135	30.0148			0.711529	0.583618	-0.580828	-1.55771	0	P51149;A0A6Q8PGE6;C9J8S3;A0A6Q8PG52;A0A6Q8PH84;C9J4V0;C9J592;C9IZZ0;C9J4S4;C9J7D1;A0A6Q8PF79	P51149;A0A6Q8PGE6;C9J8S3;A0A6Q8PG52;A0A6Q8PH84;C9J4V0;C9J592;C9IZZ0;C9J4S4	Ras-related protein Rab-7a	RAB7A
27.724	28.0122	26.2795	27.6001	27.4941	27.2729			0.0756331	1	-0.117181	-0.215158	0	P51398;V9GZ61;V9GYA7;V9GZ03;V9GYJ9;V9GYL9;V9GYC9;V9GYW1;V9GYJ3;V9GY11;V9GYF7;V9GYR8;V9GYL4	P51398;V9GZ61;V9GYA7;V9GZ03;V9GYJ9;V9GYL9	28S ribosomal protein S29, mitochondrial	DAP3
27.2213	27.8942	27.3	27.5878	28.1081	27.7178			0.559645	0.880819	-0.332723	-1.2616	0	P51553;E7EQB8;E9PF84;G5E9Q7;H7C1W2;H0Y5Q7	P51553;E7EQB8;E9PF84;G5E9Q7	Isocitrate dehydrogenase [NAD] subunit gamma, mitochondrial;Isocitrate dehydrogenase [NAD] subunit, mitochondrial	IDH3G
25.2432	28.5504	25.6665	27.1578	27.1025	26.5899			0.16551	1	-0.46335	-0.439336	0	P51570;K7EII7;K7ERJ9;K7ERN9	P51570;K7EII7;K7ERJ9;K7ERN9	Galactokinase	GALK1
28.7015	28.3262	25.7271	29.4262	28.9277	29.1313			0.767026	0.507679	-1.57681	-1.66625	0	P51571;A6NLM8	P51571;A6NLM8	Translocon-associated protein subunit delta	SSR4
27.159	25.4589	24.6867	27.2537	27.1791	27.3454			0.953693	0.355867	-1.49121	-2.03756	0	P51572;A0A2R8Y5M6;C9JSP1;C9JQ75;C9J0M4;C9JMD7;C9JM14	P51572;A0A2R8Y5M6;C9JSP1;C9JQ75;C9J0M4;C9JMD7	B-cell receptor-associated protein 31	BCAP31
26.6583	26.2652	25.3091	26.7471	26.5444	26.5963			0.610958	0.775506	-0.551789	-1.36174	0	P51580	P51580	Thiopurine S-methyltransferase	TPMT
28.1606	28.4398	27.2795	27.8665	28.4122	28.4926			0.301056	1	-0.297161	-0.740752	0	P51610;A6NEM2;H7C1C4	P51610;A6NEM2	Host cell factor 1;HCF N-terminal chain 1;HCF N-terminal chain 2;HCF N-terminal chain 3;HCF N-terminal chain 4;HCF N-terminal chain 5;HCF N-terminal chain 6;HCF C-terminal chain 1;HCF C-terminal chain 2;HCF C-terminal chain 3;HCF C-terminal chain 4;HCF C-terminal chain 5;HCF C-terminal chain 6	HCFC1
29.0032	29.5244	27.1308	29.0418	29.0133	28.9436			0.24239	1	-0.446736	-0.614225	0	P51665;H3BNT7;H3BTM8;H3BQV2	P51665;H3BNT7;H3BTM8	26S proteasome non-ATPase regulatory subunit 7	PSMD7
26.6811	27.075	25.4125	26.7191	26.1838	26.2395			0.0054166	1	0.00875219	0.0165273	0	P51687	P51687	Sulfite oxidase, mitochondrial	SUOX
27.8494	27.8344	25.2634	28.1748	28.1094	27.905			0.554584	0.893514	-1.08067	-1.25171	0	P51812;B1AXG1;B7ZB17;B4DG22;A0A2R8Y603;Q9UK32;A0A2R8Y7S9	P51812;B1AXG1;B7ZB17;B4DG22	Ribosomal protein S6 kinase alpha-3	RPS6KA3
30.4141	30.6182	30.0643	30.6338	30.6408	30.5981			0.730395	0.555438	-0.258718	-1.59455	0	P51858	P51858	Hepatoma-derived growth factor	HDGF
29.0209	29.5392	28.3273	28.3436	29.0324	28.8577			0.206784	1	0.217861	0.534728	0	P51970	P51970	NADH dehydrogenase [ubiquinone] 1 alpha subcomplex subunit 8	NDUFA8
30.8523	30.8886	30.716	31.295	31.1513	31.3258	+	3ha_huvec	2.36613	0.03	-0.438389	-5.83327	0	P52209;K7EM49;K7EMN2;K7EPF6;K7ELN9	P52209	6-phosphogluconate dehydrogenase, decarboxylating	PGD
27.065	27.2972	26.6524	28.0015	27.5904	27.6775			1.53284	0.139171	-0.75163	-3.32214	0	P52306;H0Y8M2;D6REZ0;D6RB97;D6RBC6;D6RHH8	P52306	Rap1 GTPase-GDP dissociation stimulator 1	RAP1GDS1
31.458	31.3703	31.2024	31.8809	31.8639	31.7911	+	3ha_huvec	2.48394	0.0204444	-0.50175	-6.28074	0	P52565;J3KTF8;J3QQX2;J3KRE2;J3KRY1;J3KS60	P52565;J3KTF8;J3QQX2;J3KRE2;J3KRY1	Rho GDP-dissociation inhibitor 1	ARHGDIA
25.7127	27.0626	25.771	26.9576	27.6289	27.1233			1.02143	0.311259	-1.05451	-2.17585	0	P52594;C9J2I0;B8ZZY2	P52594;C9J2I0;B8ZZY2	Arf-GAP domain and FG repeat-containing protein 1	AGFG1
29.1408	29.0076	28.5414	29.4708	29.6839	29.8847			1.64347	0.135775	-0.783255	-3.60156	0	P52597;A0A1B0GW42	P52597	Heterogeneous nuclear ribonucleoprotein F;Heterogeneous nuclear ribonucleoprotein F, N-terminally processed	HNRNPF
25.4786	26.7529	25.0827	27.5776	27.5177	28.1133			1.6621	0.132047	-1.96476	-3.64996	0	P52788;H7C2R7	P52788	Spermine synthase	SMS
26.6638	26.9815	25.8227	26.2124	26.8949	26.8351			0.143511	1	-0.15813	-0.386796	0	P52789;E9PB90;P52790	P52789;E9PB90	Hexokinase-2;Hexokinase	HK2
28.0471	28.3015	27.3857	27.9611	28.0918	27.9136			0.0998941	1	-0.0774091	-0.278375	0	P52888;K7EP46;K7EL02;K7EKB6;K7EMU4;K7EIK4;K7EL32	P52888;K7EP46	Thimet oligopeptidase	THOP1
30.4789	30.9424	30.1415	30.7839	30.9746	30.8625			0.670657	0.675652	-0.35272	-1.47802	0	P52907	P52907	F-actin-capping protein subunit alpha-1	CAPZA1
27.2485	27.6439	24.9817	27.1737	27.3246	27.3808			0.330974	1	-0.668315	-0.80356	0	P52948;A0A3B3ITD8;H7C3P6;H0YDF4;H0YEN4;H0YCT1;H0YCR0	P52948;A0A3B3ITD8;H7C3P6	Nuclear pore complex protein Nup98-Nup96;Nuclear pore complex protein Nup98;Nuclear pore complex protein Nup96	NUP98
27.6993	27.7551	26.8388	26.923	27.2111	27.4277			0.299438	1	0.243794	0.737325	0	P53004;C9J1E1	P53004	Biliverdin reductase A	BLVRA
28.7658	29.243	27.8114	28.6515	28.6224	28.5954			0.0128531	1	-0.0163809	-0.0388945	0	P53007;B4DP62	P53007;B4DP62	Tricarboxylate transport protein, mitochondrial	SLC25A1
28.0343	28.4126	27.7455	28.0325	28.5249	28.4437			0.47519	0.980088	-0.269566	-1.09553	0	P53041;H0YDU8;A8MU39	P53041;H0YDU8;A8MU39	Serine/threonine-protein phosphatase 5;Serine/threonine-protein phosphatase	PPP5C
29.1357	29.4322	27.7144	29.3019	29.1372	29.0996			0.321885	1	-0.418797	-0.784586	0	P53367	P53367	Arfaptin-1	ARFIP1
30.8422	31.2007	29.5801	30.6009	30.641	30.7927			0.0994433	1	-0.137204	-0.277221	0	P53396;K7ESG8;K7EIE7	P53396	ATP-citrate synthase	ACLY
30.104	30.7809	27.9607	30.3615	30.36	30.495			0.391772	1	-0.790302	-0.928463	0	P53582;H0Y955;H0Y903;H0YAI3;H0Y9L0;D6RF24	P53582	Methionine aminopeptidase 1	METAP1
30.4535	30.4215	29.322	30.4652	30.3518	30.8908			0.548015	0.89734	-0.503604	-1.23885	0	P53597;A0A494C0D1;H7C233	P53597;A0A494C0D1	Succinyl-CoA ligase [ADP/GDP-forming] subunit alpha, mitochondrial	SUCLG1
27.974	28.4615	25.6183	27.7683	27.9984	27.9788			0.254202	1	-0.563881	-0.640111	0	P53602;H3BP35;H3BQ47;H3BRZ1;H3BVC4	P53602;H3BP35	Diphosphomevalonate decarboxylase	MVD
26.1418	27.4893	25.3451	27.0587	26.4356	27.0916			0.334828	1	-0.536566	-0.81158	0	P53611;Q5T4U8	P53611;Q5T4U8	Geranylgeranyl transferase type-2 subunit beta	RABGGTB
29.8577	30.4308	28.8162	30.1153	30.1077	29.8011			0.251168	1	-0.306476	-0.633483	0	P53618;E9PP73;E9PP63;E9PKQ1	P53618;E9PP73	Coatomer subunit beta	COPB1
29.0665	29.1884	27.26	28.9531	28.7928	28.9424			0.247381	1	-0.391141	-0.62519	0	P53621;A0A3B3IT15;A0A3B3IS84;A0A3B3ISC6;A0A3B3IU89;A0A3B3ITV3;A0A3B3ITI7;A0A3B3ISK1;A0A3B3IU78;A0A3B3IS23;A0A3B3ITX2	P53621;A0A3B3IT15;A0A3B3IS84;A0A3B3ISC6;A0A3B3IU89	Coatomer subunit alpha;Xenin;Proxenin	COPA
27.1942	28.46	24.4038	27.9832	27.6309	27.1709			0.302803	1	-0.909005	-0.744447	0	P53794	P53794	Sodium/myo-inositol cotransporter	SLC5A3
28.7387	29.0715	24.1099	28.8856	29.0415	29.3013			0.478381	0.974611	-1.76941	-1.10185	0	P53985;Q5T8R3;Q5T8R5	P53985;Q5T8R3;Q5T8R5	Monocarboxylate transporter 1	SLC16A1
27.6035	27.0813	25.3719	27.1006	27.073	27.4409			0.309655	1	-0.519259	-0.758909	0	P53990;H3BQF7;H3BMU1;H3BUI0;F5GXM3;J3KR23;H3BRE2;H3BPP6	P53990;H3BQF7;H3BMU1;H3BUI0;F5GXM3;J3KR23	IST1 homolog	IST1
28.8813	29.458	28.1521	28.8709	29.1238	29.0692			0.189331	1	-0.190802	-0.494857	0	P53992;G5EA31;A0A0U1RR49	P53992;G5EA31	Protein transport protein Sec24C	SEC24C
30.656	31.0616	30.0246	30.9961	30.9171	31.2305			0.670685	0.676662	-0.467167	-1.47808	0	P53999	P53999	Activated RNA polymerase II transcriptional coactivator p15	SUB1
29.5131	30.2201	28.7129	29.7534	29.7976	29.6994			0.242523	1	-0.268116	-0.614518	0	P54136;E5RJM9;E5RH09;E5RI24	P54136	Arginine--tRNA ligase, cytoplasmic	RARS
30.7268	30.4314	30.0213	30.8129	30.7283	30.8354			0.898407	0.380904	-0.399016	-1.92628	0	P54577;A0A6Q8PFX2;A0A0C4DGZ5;A0A6Q8PFX4;A0A6Q8PF15;A0A6Q8PFC1	P54577;A0A6Q8PFX2	Tyrosine--tRNA ligase, cytoplasmic;Tyrosine--tRNA ligase, cytoplasmic, N-terminally processed	YARS
30.1349	30.314	28.8763	30.261	30.1836	30.3224			0.456459	0.998817	-0.480637	-1.05835	0	P54578;A6NJA2;J3QQT6;J3KS55	P54578;A6NJA2	Ubiquitin carboxyl-terminal hydrolase 14;Ubiquitin carboxyl-terminal hydrolase	USP14
28.3244	28.3621	27.9297	28.6861	28.6642	28.777			1.61715	0.132723	-0.503714	-3.53387	0	P54709;C9JA36;C9JXZ1;H7C4L9;H7C547;F8WBY4	P54709;C9JA36;C9JXZ1	Sodium/potassium-transporting ATPase subunit beta-3	ATP1B3
30.0132	30.0598	28.246	30.0923	30.0069	29.9638			0.413225	1	-0.581315	-0.971827	0	P54727;Q5W0S5;Q5W0S4;H0Y579	P54727;Q5W0S5	UV excision repair protein RAD23 homolog B	RAD23B
26.9536	27.5272	27.1207	27.0719	27.3408	26.8688			0.186544	1	0.106673	0.488429	0	P54802;K7ENX5	P54802	Alpha-N-acetylglucosaminidase;Alpha-N-acetylglucosaminidase 82 kDa form;Alpha-N-acetylglucosaminidase 77 kDa form	NAGLU
29.6789	29.9166	27.6536	29.3535	29.6482	29.4081			0.206754	1	-0.386928	-0.534661	0	P54886	P54886	Delta-1-pyrroline-5-carboxylate synthase;Glutamate 5-kinase;Gamma-glutamyl phosphate reductase	ALDH18A1
27.9069	28.3596	27.2673	28.176	28.0279	28.1032			0.332229	1	-0.257761	-0.806174	0	P54920;M0R0Y2;M0R2M1;M0R058;M0R0I4;M0R027;M0R213;M0QZM9;M0QZN5;M0R031;A0A087WZQ7;Q9H115	P54920;M0R0Y2;M0R2M1	Alpha-soluble NSF attachment protein	NAPA
29.2137	29.982	28.4842	29.6465	29.4986	29.4247			0.271805	1	-0.296607	-0.678282	0	P55010;H0YLZ1;H0YN40;H0YMJ8;H0YM54;H0YK11;H0YK29	P55010;H0YLZ1;H0YN40	Eukaryotic translation initiation factor 5	EIF5
30.6523	30.9447	30.002	31.2271	31.1403	31.3036			1.14942	0.248161	-0.690646	-2.44417	0	P55011;G3XAL9;H0YMG9;Q8IUN5;H0YLJ2;A0A2R8Y6V7;Q13621	P55011;G3XAL9	Solute carrier family 12 member 2	SLC12A2
30.0383	30.7541	28.9189	30.8419	30.74	30.5971			0.695699	0.621388	-0.822538	-1.52683	0	P55036;Q5VWC4;A6PVX3;H0Y3Y9;A2A3N6;H0Y561	P55036;Q5VWC4;A6PVX3	26S proteasome non-ATPase regulatory subunit 4	PSMD4
29.597	29.9771	28.5436	29.6408	29.6796	29.7661			0.305638	1	-0.322958	-0.750438	0	P55060	P55060	Exportin-2	CSE1L
32.141	32.1934	31.6049	32.4188	32.4163	32.4885			1.14496	0.249788	-0.461405	-2.43464	0	P55072;A0A7P0TAW3;A0A7I2V540;A0A7P0T8Q5;A0A7P0TAQ1;A0A7P0Z4C6;A0A7I2V2Y2;A0A7I2V5G8;A0A7P0TA22;A0A7P0Z4D1;A0A7P0TBK7;A0A7I2YQJ0	P55072;A0A7P0TAW3;A0A7I2V540;A0A7P0T8Q5;A0A7P0TAQ1;A0A7P0Z4C6;A0A7I2V2Y2	Transitional endoplasmic reticulum ATPase	VCP
26.8306	26.4175	27.2994	26.9344	27.2207	27.0012			0.307471	1	-0.202931	-0.754306	0	P55081	P55081	Microfibrillar-associated protein 1	MFAP1
30.3956	30.1542	29.3359	30.3368	30.34	30.6443			0.641837	0.730364	-0.478447	-1.42189	0	P55084;F5GZQ3;B5MD38;C9JEY0;C9JE81;C9K0M0	P55084;F5GZQ3;B5MD38	Trifunctional enzyme subunit beta, mitochondrial;3-ketoacyl-CoA thiolase	HADHB
28.4875	28.0944	27.0649	28.3985	29.1235	29.1362			0.960763	0.346354	-1.00386	-2.05189	0	P55145;H7C2D6	P55145	Mesencephalic astrocyte-derived neurotrophic factor	MANF
28.5619	28.5051	27.6566	28.9093	29.0398	29.1357			1.23211	0.215957	-0.78702	-2.62325	0	P55263;A0A5K1VW54;A0A5F9ZH31;A0A5K1VW94;A0A5F9ZH72;A0A5F9ZHJ1;A0A5F9ZH83;A0A5F9ZGZ8;A0A5F9ZH76	P55263;A0A5K1VW54;A0A5F9ZH31;A0A5K1VW94;A0A5F9ZH72;A0A5F9ZHJ1	Adenosine kinase	ADK
28.7986	29.3973	27.8314	29.0016	29.0127	28.9636			0.279225	1	-0.316874	-0.694237	0	P55265;A0A7P0Z4F9;A0A7P0Z4K3;A0A3B3ISU1;A0A3B3ISX1	P55265;A0A7P0Z4F9;A0A7P0Z4K3;A0A3B3ISU1;A0A3B3ISX1	Double-stranded RNA-specific adenosine deaminase	ADAR
29.4476	30.258	28.8365	29.3737	29.4452	29.3977			0.094003	1	0.108513	0.263235	0	P55327;E5RK35	P55327	Tumor protein D52	TPD52
29.5082	30.1347	23.1843	29.5362	29.7781	29.6347			0.387035	1	-2.04061	-0.918843	0	P55735;A8MXL6;E7ERC8	P55735;A8MXL6	Protein SEC13 homolog	SEC13
28.7997	29.847	24.8073	28.7031	29.107	28.8145			0.275503	1	-1.0569	-0.686245	0	P55795	P55795	Heterogeneous nuclear ribonucleoprotein H2	HNRNPH2
28.5556	27.7922	28.5742	28.8407	28.7419	27.9754			0.219928	1	-0.21203	-0.564349	0	P55809;E9PDW2;Q9BYC2	P55809;E9PDW2	Succinyl-CoA:3-ketoacid coenzyme A transferase 1, mitochondrial	OXCT1
29.268	29.3857	28.6585	29.1039	29.1791	29.178			0.0770594	1	-0.0496387	-0.218939	0	P55884;C9JZG1;C9JQN7	P55884	Eukaryotic translation initiation factor 3 subunit B	EIF3B
27.7912	28.0364	24.2903	27.8566	27.7588	28.1003			0.42112	1	-1.19924	-0.987709	0	P55957	P55957	BH3-interacting domain death agonist;BH3-interacting domain death agonist p15;BH3-interacting domain death agonist p13;BH3-interacting domain death agonist p11	BID
29.6481	30.4588	25.1578	28.9822	29.1031	28.9878			0.134774	1	-0.602815	-0.365557	0	P56134	P56134	ATP synthase subunit f, mitochondrial	ATP5J2
27.3767	26.7621	26.6387	27.3159	27.3176	27.6205			0.920826	0.372156	-0.492184	-1.97125	0	P56182;D6RE82	P56182	Ribosomal RNA processing protein 1 homolog A	RRP1
30.0121	30.5241	29.0035	30.3372	30.2703	30.2446			0.416015	1	-0.437462	-0.977445	0	P56192;H0YIP0;H0YHV5;F5H2V6;H0YIC2;F8VS26;F8W0M7;F8W0S4;F8VZZ9;H0YI94;F8VPL7;H0YHL6;H0YI27	P56192	Methionine--tRNA ligase, cytoplasmic	MARS
27.303	27.1746	28.2612	27.6566	27.8782	27.847			0.241792	1	-0.214351	-0.61291	0	P56211;H3BMD8;H3BQ52;H3BTD3	P56211;H3BMD8;H3BQ52;H3BTD3	cAMP-regulated phosphoprotein 19	ARPP19
28.1281	28.6366	27.3644	26.9939	27.5746	27.9002			0.536677	0.908795	0.553492	1.21664	0	P56385	P56385	ATP synthase subunit e, mitochondrial	ATP5I
30.8722	30.2995	30.8601	30.9561	30.9882	31.0056			0.740938	0.53831	-0.306023	-1.61517	0	P56470;M0QZ93	P56470;M0QZ93	Galectin-4;Galectin	LGALS4
30.8739	30.2241	30.5266	30.9951	31.1261	31.1879			1.33896	0.178312	-0.561459	-2.86241	0	P56537;B7ZBH1;F8WD20;A0A0B4J1Y7;A0A0U1RQV5;F8WDS6	P56537	Eukaryotic translation initiation factor 6	EIF6
28.7362	29.3245	27.6306	28.8833	28.3197	28.6126			0.0266079	1	-0.0414556	-0.079341	0	P56545	P56545	C-terminal-binding protein 2	CTBP2
27.4	28.602	24.8274	28.6481	28.0585	27.3245			0.380953	1	-1.06719	-0.906468	0	P57088;D6RAA6;J3KN43;D6RBY2;H0Y8N0	P57088;D6RAA6	Transmembrane protein 33	TMEM33
26.7259	25.9239	26.37	27.026	26.3525	26.6505			0.482732	0.966994	-0.336436	-1.11046	0	P57735	P57735	Ras-related protein Rab-25	RAB25
31.0837	30.7731	29.198	30.7468	31.073	31.235			0.482008	0.968711	-0.666673	-1.10903	0	P58546;C9JL85	P58546	Myotrophin	MTPN
33.4811	33.6034	32.3241	33.6547	33.6192	33.6421			0.544641	0.898418	-0.502427	-1.23224	0	P60174;U3KPZ0;U3KQF3;U3KPS5	P60174	Triosephosphate isomerase	TPI1
27.5226	28.2944	24.1539	27.7512	27.3614	27.7323			0.30537	1	-0.957981	-0.749873	0	P60510;H3BTA2;H3BV22;I3L4X0;H3BPN5;H3BVE3	P60510;H3BTA2;H3BV22	Serine/threonine-protein phosphatase 4 catalytic subunit;Serine/threonine-protein phosphatase	PPP4C
31.6556	31.4084	31.2054	31.7561	31.761	31.9862			1.2801	0.199641	-0.411285	-2.72952	0	P60842;J3KT12;J3KTB5;J3QS69;J3QL43;J3QR64;J3KSZ0;J3QLN6;J3QKZ9;J3KS25;J3KS93;J3KT04;E7EMV8;J3QL52	P60842;J3KT12;J3KTB5;J3QS69;J3QL43;J3QR64;J3KSZ0	Eukaryotic initiation factor 4A-I	EIF4A1
31.6938	30.6992	25.0955	31.214	31.8681	31.3799			0.490924	0.961774	-2.32449	-1.12665	0	P60866;E5RIP1;E5RJX2;A0A7P0S5H5;G3XAN0	P60866;E5RIP1;E5RJX2;A0A7P0S5H5	40S ribosomal protein S20	RPS20
30.5398	31.5851	29.1044	30.6522	30.5834	30.4183			0.0684239	1	-0.141523	-0.195907	0	P60903	P60903	Protein S100-A10	S100A10
28.4859	27.9445	27.1592	28.876	29.4665	28.1487			0.827413	0.442064	-0.967193	-1.78512	0	P60981;F6RFD5	P60981;F6RFD5	Destrin	DSTN
26.6369	25.6977	25.5485	26.5145	26.8324	26.6577			0.937166	0.364671	-0.707186	-2.00415	0	P61009	P61009	Signal peptidase complex subunit 3	SPCS3
27.0108	27.9739	26.5983	27.3535	27.22	27.0029			0.00173338	1	0.0022316	0.0053111	0	P61011;G3V4F7;A0A7P0PJI2;A0A7I2V5K0;G3V480;A0A7I2V584;A0A7I2V5S0	P61011;G3V4F7;A0A7P0PJI2;A0A7I2V5K0;G3V480;A0A7I2V584	Signal recognition particle 54 kDa protein	SRP54
29.3477	30.0976	29.1133	29.5903	29.5195	29.6949			0.097555	1	-0.0820363	-0.272379	0	P61019;E9PKL7;H7C125	P61019;E9PKL7	Ras-related protein Rab-2A	RAB2A
28.5337	27.6682	24.4424	28.6938	27.5963	28.5124			0.464413	0.994615	-1.38604	-1.07416	0	P61026;A0A2R8YDI9;H0YLJ8;H0YL94;H0YMN7;G3V196;A0A2R8YFB8;P59190	P61026	Ras-related protein Rab-10	RAB10
29.1576	30.0076	27.7843	28.9516	29.5121	29.3315			0.158077	1	-0.281906	-0.42173	0	P61081;M0QX69;M0QYI6	P61081	NEDD8-conjugating enzyme Ubc12	UBE2M
28.642	28.4301	28.1454	28.7254	28.6422	29.0445			0.987725	0.328805	-0.398242	-2.10675	0	P61086;D6RDM7	P61086;D6RDM7	Ubiquitin-conjugating enzyme E2 K	UBE2K
30.7701	31.1812	30.0186	30.6814	30.7092	31.0495			0.163586	1	-0.156684	-0.434793	0	P61088;F8VQQ8;F8VSD4;F8VV71;Q5JXB2;F8VZ29	P61088;F8VQQ8;F8VSD4;F8VV71;Q5JXB2	Ubiquitin-conjugating enzyme E2 N;Putative ubiquitin-conjugating enzyme E2 N-like	UBE2N;UBE2NL
29.7897	30.131	27.946	30.0068	30.2648	30.2958			0.586798	0.819046	-0.90026	-1.31463	0	P61106;X6RFL8	P61106;X6RFL8	Ras-related protein Rab-14	RAB14
30.5381	30.5447	30.1606	30.7622	30.7043	30.4976			0.732868	0.551726	-0.240225	-1.59939	0	P61158;B4DXW1;F8WDR7;F8WEW2;F8WE84	P61158;B4DXW1	Actin-related protein 3	ACTR3
30.3036	29.8781	29.7756	30.2888	30.4505	30.5725			1.17084	0.241377	-0.451544	-2.4901	0	P61160;F5H6T1;A0A1B0GWD0;A0A1B0GWH0	P61160;F5H6T1	Actin-related protein 2	ACTR2
28.8882	29.6124	24.8235	29.2619	29.3373	29.4446			0.454768	1	-1.57326	-1.05498	0	P61163;R4GMT0;A0A1B0GVS3	P61163;R4GMT0;A0A1B0GVS3	Alpha-centractin	ACTR1A
27.7474	27.9258	26.8775	27.7522	27.9607	27.8161			0.421923	1	-0.326118	-0.989321	0	P61201;B4DIH5;H0YKU5;H0YM03;H0YMC2	P61201;B4DIH5	COP9 signalosome complex subunit 2	COPS2
30.5066	30.9866	29.9183	31.233	31.3071	31.0473			1.07041	0.292976	-0.725254	-2.27737	0	P84077;P61204;F5H423;F5H0C7;H0YGG7;F5H1V1;F5H6T5	P84077;P61204;F5H423;F5H0C7	ADP-ribosylation factor 1;ADP-ribosylation factor 3	ARF1;ARF3
29.5942	30.3143	28.5546	29.5841	29.6646	29.5002			0.0646508	1	-0.0952759	-0.185741	0	P61221;D6R9I9;D6RGF4	P61221;D6R9I9	ATP-binding cassette sub-family E member 1	ABCE1
29.1607	28.2017	28.0392	28.8707	29.3337	29.2721			0.847912	0.418231	-0.691612	-1.8257	0	P61224;A6NIZ1;F5H7Y6;E7ESV4;F5H823;F5GX62;F5H004;F5GZG1;B7ZB78;F5H6R7;F5H500;F5H4H0;F5H0B7;F5H491;F5GYB5;F5GWU8;F5H077;F5GYH7;F8WBC0	P61224;A6NIZ1;F5H7Y6;E7ESV4;F5H823;F5GX62;F5H004;F5GZG1;B7ZB78;F5H6R7	Ras-related protein Rap-1b;Ras-related protein Rap-1b-like protein	RAP1B
31.1049	31.1812	31.242	31.231	31.1438	31.4475			0.424449	1	-0.0980593	-0.994393	0	P61247;D6RAT0;H0Y9Y4;D6RG13;D6RB09;D6R9B6;E9PFI5;H0Y8L7;D6RAS7;D6RED7;D6RI02;D6RGE0	P61247;D6RAT0;H0Y9Y4;D6RG13;D6RB09;D6R9B6;E9PFI5;H0Y8L7	40S ribosomal protein S3a	RPS3A
28.7386	29.4927	24.5276	28.591	28.7294	28.5271			0.266099	1	-1.02952	-0.665959	0	P61289;K9J957;K7ENH2;B3KQ25;K7ESG5;A0A087WTV2;K7EMD0;K7EPX6;K7EKR3;B7Z8D3	P61289;K9J957;K7ENH2;B3KQ25;K7ESG5;A0A087WTV2	Proteasome activator complex subunit 3	PSME3
30.6388	29.5865	29.9401	30.943	30.5771	30.8678			1.05911	0.296415	-0.740818	-2.25381	0	P61313;A0A2R8YEM3;E7EQV9;E7ENU7;E7EX53;A0A2R8Y738;E7ERA2	P61313;A0A2R8YEM3;E7EQV9;E7ENU7;E7EX53;A0A2R8Y738	60S ribosomal protein L15;Ribosomal protein L15	RPL15
30.3347	30.0245	30.5636	30.3981	30.3535	30.1284			0.0269683	1	0.0142371	0.0803855	0	P61353;K7ELC7;K7EQQ9;K7ERY7	P61353;K7ELC7	60S ribosomal protein L27	RPL27
27.5555	26.6995	27.1743	27.8424	28.1969	27.7425			1.29695	0.19654	-0.784179	-2.76727	0	P61457	P61457	Pterin-4-alpha-carbinolamine dehydratase	PCBD1
30.2341	30.1527	30.1477	30.4621	30.0858	30.2554			0.328004	1	-0.0895882	-0.79737	0	P61586;P08134;Q5JR08;C9JX21;Q5JR05;A0A7I2YQV1;Q5JR07;C9JNR4;A0A7I2V3G1;E9PQH6;A0A7I2V5E6;U3KQA9;E9PN11;E9PLA2;Q5JR06;C9JRM1;U3KQV3;P62745	P61586;P08134;Q5JR08;C9JX21;Q5JR05;A0A7I2YQV1;Q5JR07;C9JNR4;A0A7I2V3G1;E9PQH6	Transforming protein RhoA;Rho-related GTP-binding protein RhoC	RHOA;RHOC
32.1193	31.9869	30.7771	31.7361	31.7209	31.7631			0.0937944	1	-0.112228	-0.262697	0	P61604;B8ZZL8;B8ZZ54	P61604;B8ZZL8	10 kDa heat shock protein, mitochondrial	HSPE1
27.805	27.6871	27.2184	27.5759	27.4151	27.6453			0.0439786	1	0.0247008	0.128852	0	P61964;V9GZ59	P61964	WD repeat-containing protein 5	WDR5
30.1615	29.9994	24.519	30.0303	29.6104	30.0189			0.37417	1	-1.65989	-0.892631	0	P61970;H3BRV9	P61970;H3BRV9	Nuclear transport factor 2	NUTF2
32.5564	32.9453	31.3629	32.7139	32.9605	32.8921			0.516806	0.940168	-0.567305	-1.17764	0	P61978;S4R457;S4R359	P61978	Heterogeneous nuclear ribonucleoprotein K	HNRNPK
30.4643	30.5192	29.0503	31.023	30.6656	30.55			0.664392	0.686708	-0.734919	-1.46582	0	P61981	P61981	14-3-3 protein gamma;14-3-3 protein gamma, N-terminally processed	YWHAG
30.6684	31.1278	29.3359	31.2246	31.2336	30.933			0.619469	0.75843	-0.753023	-1.37832	0	P62081;B5MCP9;A0A2R8Y623	P62081;B5MCP9;A0A2R8Y623	40S ribosomal protein S7	RPS7
30.4241	30.649	29.6699	30.3585	30.5801	30.4499			0.286654	1	-0.215174	-0.710136	0	P62136;E9PMD7;A0A7I2V4F7	P62136;E9PMD7;A0A7I2V4F7	Serine/threonine-protein phosphatase PP1-alpha catalytic subunit;Serine/threonine-protein phosphatase	PPP1CA
28.5039	27.6514	27.7042	28.4799	28.7166	28.3526			0.88766	0.394977	-0.563204	-1.90479	0	P62140;E7ETD8;C9JP48;C9J9S3;H0Y3Y6;F8WE71;F8W1A0	P62140;E7ETD8;C9JP48	Serine/threonine-protein phosphatase PP1-beta catalytic subunit;Serine/threonine-protein phosphatase	PPP1CB
29.0493	29.6293	27.5576	29.1823	29.3219	29.2937			0.349335	1	-0.520581	-0.841634	0	P62191;G3V4X1	P62191	26S protease regulatory subunit 4	PSMC1
29.2748	29.9555	28.7901	29.3394	29.2361	29.5062			0.0195968	1	-0.020429	-0.0588696	0	P62195;J3QQM1;J3QSA9;J3QLH6;J3KRP2;J3QSE0;J3QRW1;J3QRR3;J3KTQ9	P62195;J3QQM1;J3QSA9;J3QLH6;J3KRP2	26S protease regulatory subunit 8	PSMC5
31.5408	31.3455	30.4904	31.9454	31.7729	31.5652			0.867784	0.409192	-0.635588	-1.86517	0	P62241;Q5JR95	P62241;Q5JR95	40S ribosomal protein S8	RPS8
29.8558	29.2089	29.8485	29.9429	29.7105	29.619			0.195619	1	-0.119729	-0.509298	0	P62244;I3L3P7;H3BVC7	P62244;I3L3P7	40S ribosomal protein S15a	RPS15A
31.1574	30.8198	28.841	30.7253	30.9215	30.2646			0.18591	1	-0.364366	-0.486965	0	P62249;M0R210;M0R3H0;M0R1M5;Q6IPX4;M0QX76	P62249;M0R210;M0R3H0;M0R1M5	40S ribosomal protein S16	RPS16
33.1973	33.4524	31.8148	33.1772	33.3324	33.5103			0.427945	1	-0.518461	-1.00141	0	P62258;B4DJF2;I3L3T1;K7EM20;K7EIT4;I3L0W5	P62258	14-3-3 protein epsilon	YWHAE
30.698	30.4259	28.6387	30.2696	29.9249	30.7142			0.216955	1	-0.382072	-0.557677	0	P62266;D6RD47;D6RDJ2;D6RIX0;D6R9I7	P62266;D6RD47	40S ribosomal protein S23	RPS23
31.3914	30.4466	30.0963	30.894	30.7751	30.5198			0.0740492	1	-0.084844	-0.210947	0	P62269;A0A0G2JQH2;Q5GGW2;J3JS69	P62269	40S ribosomal protein S18	RPS18
31.0341	31.4693	30.0723	30.6649	30.4894	30.4855			0.30458	1	0.311968	0.748205	0	P62277;J3KMX5;E9PS50	P62277;J3KMX5	40S ribosomal protein S13	RPS13
30.3192	30.9421	29.4801	30.4348	30.2203	30.6618			0.163132	1	-0.191849	-0.433718	0	P62280;M0QZC5;M0R1H5;M0R1H6	P62280;M0QZC5	40S ribosomal protein S11	RPS11
30.2744	30.1342	28.0972	30.5472	30.5465	30.8945			0.747488	0.528747	-1.16078	-1.62798	0	P62306;A0A0B4J254;F8W0W6	P62306;A0A0B4J254;F8W0W6	Small nuclear ribonucleoprotein F	SNRPF
29.68	30.1667	24.9325	29.3092	29.2171	28.873			0.200942	1	-0.873348	-0.521453	0	P62310	P62310	U6 snRNA-associated Sm-like protein LSm3	LSM3
30.5255	29.7576	30.2283	30.8936	30.6125	30.793			1.1763	0.244574	-0.595896	-2.50185	0	P62314;J3QLI9;J3QLR7	P62314;J3QLI9	Small nuclear ribonucleoprotein Sm D1	SNRPD1
30.1831	30.6907	30.1055	30.0276	30.3042	30.2439			0.26635	1	0.134509	0.666503	0	P62316;K7ERG4;K7EJB5	P62316;K7ERG4	Small nuclear ribonucleoprotein Sm D2	SNRPD2
30.9884	30.8753	30.6034	31.8262	31.4998	31.3553			1.82718	0.105333	-0.738078	-4.09717	0	P62318;H3BT13	P62318;H3BT13	Small nuclear ribonucleoprotein Sm D3	SNRPD3
32.1843	32.2124	30.5643	31.7042	31.3048	31.7703			0.036379	1	0.0605507	0.107395	0	P62328	P62328	Thymosin beta-4;Hematopoietic system regulatory peptide	TMSB4X
26.4311	27.9339	24.5863	27.5323	27.6793	27.7794			0.624036	0.760884	-1.34658	-1.38722	0	P62330	P62330	ADP-ribosylation factor 6	ARF6
31.6429	31.5147	31.2239	31.4889	31.4962	31.6336			0.234349	1	-0.0790698	-0.596472	0	P62424;Q5T8U3;Q5T8U2	P62424;Q5T8U3;Q5T8U2	60S ribosomal protein L7a	RPL7A
29.4373	30.2656	29.4555	29.6759	30.082	29.8877			0.211886	1	-0.162356	-0.546266	0	P62495;B7Z7P8;I3L492;D6RJE8;D6RCB3	P62495;B7Z7P8	Eukaryotic peptide chain release factor subunit 1	ETF1
29.1674	29.57	24.7487	28.9883	29.3512	29.6937			0.413797	1	-1.51568	-0.972981	0	P62633;D6RAT4	P62633	Cellular nucleic acid-binding protein	CNBP
31.3934	31.6771	30.1402	30.8038	31.0779	31.408			0.0173899	1	-0.0263627	-0.052364	0	P62701	P62701	40S ribosomal protein S4, X isoform	RPS4X
32.2929	31.4627	31.5449	32.2243	32.0726	31.9265			0.481354	0.96953	-0.307657	-1.10773	0	P62750;H7BY10;K7EJV9;K7ERT8;A8MUS3;K7EMA7	P62750;H7BY10;K7EJV9;K7ERT8;A8MUS3;K7EMA7	60S ribosomal protein L23a	RPL23A
30.8494	31.7464	24.8549	31.7297	31.8149	31.4363			0.507184	0.948287	-2.51008	-1.15871	0	P62753;A2A3R7	P62753	40S ribosomal protein S6	RPS6
32.076	32.0491	30.785	32.9357	32.8439	32.676			1.28105	0.200824	-1.18183	-2.73164	0	P62805	P62805	Histone H4	HIST1H4A
29.6334	30.4458	29.5306	30.4307	29.6235	30.1261			0.19582	1	-0.190176	-0.509758	0	P62820;E7END7	P62820;E7END7	Ras-related protein Rab-1A	RAB1A
32.6635	33.1096	31.9975	32.5994	32.6862	32.3194			0.0557807	1	0.0551898	0.161584	0	P62826;B5MDF5;J3KQE5;F5H018;B4DV51;H0YFC6;A0A087X0W0	P62826;B5MDF5;J3KQE5;F5H018	GTP-binding nuclear protein Ran	RAN
33.2909	33.1571	31.5929	33.3494	33.0534	33.6521			0.514986	0.943083	-0.671365	-1.17406	0	P62829;C9JD32;J3KT29;J3KTJ3;B9ZVP7;J3QQT9	P62829;C9JD32;J3KT29;J3KTJ3	60S ribosomal protein L23	RPL23
26.1721	26.0961	26.2918	27.3343	27.6522	27.331	+	3ha_huvec	3.31124	0.0155	-1.25247	-10.3689	0	P62834;A0A075B6Q0	P62834;A0A075B6Q0	Ras-related protein Rap-1A	RAP1A
31.2326	30.8575	31.0786	31.7878	31.4975	31.3799			1.42484	0.149719	-0.498824	-3.06167	0	P62851	P62851	40S ribosomal protein S25	RPS25
30.3014	30.6803	25.343	30.2416	30.717	30.6492			0.437424	1	-1.76103	-1.02039	0	P62854;Q5JNZ5	P62854;Q5JNZ5	40S ribosomal protein S26;Putative 40S ribosomal protein S26-like 1	RPS26;RPS26P11
31.5145	31.8121	24.9803	31.3278	31.748	31.8137			0.418258	1	-2.1942	-0.981957	0	P62857	P62857	40S ribosomal protein S28	RPS28
29.5314	30.3258	28.5234	29.1185	29.5086	29.7287			0.00491305	1	0.00826772	0.0149993	0	P62873;B1AKQ8;F6UT28;F6X3N5;B3KVK2;F5H8J8;F5H100;F5H0S8;E9PCP0;P16520	P62873;B1AKQ8;F6UT28;F6X3N5	Guanine nucleotide-binding protein G(I)/G(S)/G(T) subunit beta-1	GNB1
28.5778	25.9701	24.6255	29.0097	28.9363	28.9759			1.04565	0.304522	-2.58283	-2.22587	0	P62877	P62877	E3 ubiquitin-protein ligase RBX1;E3 ubiquitin-protein ligase RBX1, N-terminally processed	RBX1
29.3522	29.9326	27.9417	29.4616	29.1606	29.561			0.204106	1	-0.318919	-0.528653	0	P62879;C9JXA5;C9JIS1;E7EP32;C9JZN1;A0A7I2S2S9;Q9HAV0;H7C5J5;A0A6Q8PFW8;A0A6Q8PFE0;A0A6Q8PFV8;A0A6Q8PG88;C9JD14	P62879;C9JXA5;C9JIS1;E7EP32;C9JZN1;A0A7I2S2S9;Q9HAV0	Guanine nucleotide-binding protein G(I)/G(S)/G(T) subunit beta-2;Guanine nucleotide-binding protein subunit beta-4	GNB2;GNB4
29.0512	27.923	27.9884	29.1322	29.3908	28.8035			0.912299	0.372541	-0.78796	-1.95412	0	Q59GN2;P62891	Q59GN2;P62891	Putative 60S ribosomal protein L39-like 5;60S ribosomal protein L39	RPL39P5;RPL39
30.5209	29.8615	29.2531	30.561	30.3909	30.2303			0.611446	0.774779	-0.515553	-1.36269	0	P62906	P62906	60S ribosomal protein L10a	RPL10A
31.8034	32.3141	30.8593	31.8869	32.0663	32.5428			0.46734	0.989101	-0.506419	-1.07997	0	P62913;Q5VVC8	P62913;Q5VVC8	60S ribosomal protein L11	RPL11
29.9772	30.8417	29.4487	30.5948	31.18	30.7588			0.78906	0.491991	-0.75531	-1.70952	0	P62917;E9PKU4;E9PKZ0;G3V1A1;E9PP36	P62917;E9PKU4;E9PKZ0;G3V1A1;E9PP36	60S ribosomal protein L8	RPL8
33.8854	34.22	32.0953	34.0403	34.052	34.1291			0.4374	1	-0.673598	-1.02034	0	P62937;F8WE65;C9J5S7;A0A7I2V5J5;E5RIZ5;A0A7P0S768;P0DN26;A0A0H2UH34;A0A0B4J2A2;A0A075B767;A0A075B759;Q9Y536;F5H284;P0DN37	P62937;F8WE65;C9J5S7	Peptidyl-prolyl cis-trans isomerase A;Peptidyl-prolyl cis-trans isomerase A, N-terminally processed;Peptidyl-prolyl cis-trans isomerase	PPIA
29.0616	27.4551	29.0081	29.231	29.3066	29.0513			0.575555	0.839752	-0.688002	-1.29269	0	P62942;A0A087WZM5;F6T7Q3;A0A7I2V3S6;Q1JUQ3;Q5W0X3;Q1JUQ5;A0A087WTS4;A0A087WV48	P62942;A0A087WZM5;F6T7Q3;A0A7I2V3S6	Peptidyl-prolyl cis-trans isomerase FKBP1A;Peptidyl-prolyl cis-trans isomerase	FKBP1A
30.9771	30.3406	30.4131	31.2918	31.4588	31.3761			1.74134	0.131371	-0.798617	-3.8604	0	P62979;A0A2R8Y422;P0CG48;F5GYU3;F5H388;B4DV12;F5H265;J3QKN0;F5H2Z3;F5H6Q2;F5GXK7;Q5PY61;J3QTR3;J3QS39;Q96C32;P62987;P0CG47;F5H747;M0R2S1;M0R1M6;M0R1V7;F5GZ39;J3QSA3	P62979;A0A2R8Y422;P0CG48;F5GYU3;F5H388;B4DV12;F5H265;J3QKN0;F5H2Z3;F5H6Q2;F5GXK7;Q5PY61;J3QTR3;J3QS39;Q96C32;P62987;P0CG47;F5H747	Ubiquitin-40S ribosomal protein S27a;Ubiquitin;40S ribosomal protein S27a;Polyubiquitin-C;Ubiquitin;Ubiquitin-60S ribosomal protein L40;Ubiquitin;60S ribosomal protein L40;Polyubiquitin-B;Ubiquitin	RPS27A;UBC;UBB;UBA52
27.8252	27.3392	27.9709	27.5522	27.8945	28.0532			0.192998	1	-0.121541	-0.503288	0	P62993;J3KT38;J3QRL5	P62993;J3KT38	Growth factor receptor-bound protein 2	GRB2
28.6437	28.4684	24.6053	29.0488	29.3264	28.718			0.603772	0.786389	-1.79192	-1.34774	0	P62995;H7BXF3;H7C2L4	P62995;H7BXF3	Transformer-2 protein homolog beta	TRA2B
30.6564	30.1552	28.8036	30.8672	30.8839	30.9389			0.860591	0.416205	-1.02493	-1.85087	0	P63000	P63000	Ras-related C3 botulinum toxin substrate 1	RAC1
29.5018	29.7845	28.3977	29.8924	29.9563	29.7983			0.701108	0.608391	-0.654312	-1.53738	0	P63010;A0A087X253;A0A087WU93;A0A087WZQ6;A0A087WYD1;K7EN71;K7ERB2;K7EJX1;K7EJ01;A0A087WXS3;K7EKZ5;H7C034	P63010;A0A087X253;A0A087WU93;A0A087WZQ6;A0A087WYD1	AP-2 complex subunit beta	AP2B1
32.8797	32.854	30.8262	33.0651	33.2732	33.48			0.719142	0.57692	-1.08617	-1.57257	0	P63104;E7EX29;B0AZS6;B7Z2E6;H0YB80;E7ESK7;E9PD24;E7EVZ2;E5RIR4;E5RGE1	P63104;E7EX29;B0AZS6;B7Z2E6;H0YB80	14-3-3 protein zeta/delta	YWHAZ
28.8213	29.6625	27.3372	29.1214	29.0991	28.8574			0.24122	1	-0.418973	-0.611649	0	P63151;A0A590UJY3;A0A590UJJ1;Q66LE6;E5RFR9;E5RIY1;Q00005;Q9Y2T4;E5RHQ2;E5RJV2;H0YA16;H0YB06	P63151;A0A590UJY3;A0A590UJJ1;Q66LE6	Serine/threonine-protein phosphatase 2A 55 kDa regulatory subunit B alpha isoform;Serine/threonine-protein phosphatase 2A 55 kDa regulatory subunit B delta isoform	PPP2R2A;PPP2R2D
29.9078	30.8703	28.6074	30.2722	29.9156	29.9151			0.132013	1	-0.239094	-0.358799	0	P63173;J3KT73;J3QL01;J3KSP2	P63173;J3KT73;J3QL01;J3KSP2	60S ribosomal protein L38	RPL38
29.9205	30.3085	26.9074	30.019	30.3549	30.0278			0.430882	1	-1.08844	-1.00729	0	P63208;E7ERH2;F8W8N3;E5RJR5;E5RGM3;E5RHM3;E5RGM4	P63208;E7ERH2;F8W8N3;E5RJR5;E5RGM3	S-phase kinase-associated protein 1	SKP1
29.1029	28.4977	29.081	29.1667	29.4799	29.5903			1.03462	0.31619	-0.518438	-2.20304	0	Q8WVC2;P63220;Q9BYK1;Q9BYK2	Q8WVC2;P63220;Q9BYK1	40S ribosomal protein S21	RPS21
32.1281	31.8057	32.092	32.5886	32.6423	32.67	+	3ha_huvec	2.40225	0.0310345	-0.624997	-5.96754	0	P63241;I3L397;I3L504;Q6IS14;F8WCJ1;C9J7B5;C9J4W5;Q9GZV4	P63241;I3L397;I3L504;Q6IS14	Eukaryotic translation initiation factor 5A-1;Eukaryotic translation initiation factor 5A;Eukaryotic translation initiation factor 5A-1-like	EIF5A;EIF5AL1
31.762	31.6615	31.521	31.8392	31.8784	31.8087			1.25137	0.2108	-0.193955	-2.66569	0	P63244;J3KPE3;D6RAC2;D6REE5;H0Y8W2;H0YAF8;H0YAM7;D6R9L0;D6R9Z1;D6RHH4;D6RFX4;D6RFZ9;D6RBD0;H0Y8R5;D6RF23;E9PD14;D6RAU2;D6RHJ5;H0Y9P0;D6R909;D6RGK8;D6RDI0	P63244;J3KPE3;D6RAC2;D6REE5;H0Y8W2;H0YAF8;H0YAM7;D6R9L0;D6R9Z1;D6RHH4;D6RFX4	Guanine nucleotide-binding protein subunit beta-2-like 1;Guanine nucleotide-binding protein subunit beta-2-like 1, N-terminally processed	GNB2L1
34.3008	34.6199	31.3642	34.5167	34.5839	34.0476			0.382292	1	-0.95447	-0.909196	0	P63313;CON__P21752	P63313	Thymosin beta-10	TMSB10
30.0453	30.209	29.958	30.6345	30.8327	30.8788	+	3ha_huvec	2.60556	0.00590476	-0.711261	-6.77286	0	P67809;H0Y449;C9J5V9	P67809;H0Y449	Nuclease-sensitive element-binding protein 1	YBX1
29.9478	30.0314	27.8232	29.7694	29.5286	29.667			0.206395	1	-0.38753	-0.533848	0	P67936;A0A2R8Y5V9;A0A2R8YGX3;A0A2R8YH90;A0A2R8YE05;K7ENT6;A0A5F9UN72;K7EPB9;A0A590UJB9;A0A590UK79	P67936;A0A2R8Y5V9;A0A2R8YGX3;A0A2R8YH90;A0A2R8YE05;K7ENT6	Tropomyosin alpha-4 chain	TPM4
33.7069	33.8746	32.4966	34.0494	33.6705	33.8783			0.493513	0.964281	-0.506673	-1.13176	0	P68032;P63267;P68133;P62736;A6NL76;A0A804HKV3;C9JFL5;F6UVQ4;F6QUT6;F8WB63;B8ZZJ2	P68032;P63267;P68133;P62736;A6NL76;A0A804HKV3;C9JFL5;F6UVQ4;F6QUT6	Actin, alpha cardiac muscle 1;Actin, gamma-enteric smooth muscle;Actin, alpha skeletal muscle;Actin, aortic smooth muscle	ACTC1;ACTG2;ACTA1;ACTA2
30.566	30.8361	29.1757	30.8376	30.7376	30.6925			0.473007	0.979452	-0.563252	-1.09121	0	P68036;A0A1B0GUS4	P68036;A0A1B0GUS4	Ubiquitin-conjugating enzyme E2 L3	UBE2L3
33.9395	34.2379	33.3347	34.1955	34.2666	34.0481			0.536876	0.909285	-0.332695	-1.21703	0	P68104;A0A7I2V659;A0A087WVQ9;Q5VTE0;A0A7I2V5N4;A0A7I2V3H3;A0A087WV01;Q5JR01;A6PW80	P68104;A0A7I2V659;A0A087WVQ9;Q5VTE0;A0A7I2V5N4;A0A7I2V3H3;A0A087WV01	Elongation factor 1-alpha 1;Putative elongation factor 1-alpha-like 3;Elongation factor 1-alpha	EEF1A1;EEF1A1P5
29.6582	29.2475	29.472	29.5557	29.9924	29.8587			0.912708	0.374725	-0.343022	-1.95494	0	P68366;C9JEV8;C9JQ00;C9JJQ8;C9JDL2	P68366	Tubulin alpha-4A chain	TUBA4A
33.3754	33.9781	31.8373	33.2821	33.2022	33.2949			0.111318	1	-0.196113	-0.307378	0	P68371;P04350;M0R2D3;M0QY85;M0QZL7;M0R278;M0QYM7;M0R0X0;M0QY37;M0QX14;M0R042;M0R2T4;A0A075B724	P68371;P04350	Tubulin beta-4B chain;Tubulin beta-4A chain	TUBB4B;TUBB4A
30.0705	30.2129	28.8267	29.6462	29.4196	29.7516			0.0760569	1	0.0975507	0.216282	0	P68402;J3KNE3	P68402	Platelet-activating factor acetylhydrolase IB subunit beta	PAFAH1B2
26.6588	27.3724	25.3762	27.253	26.5093	27.2501			0.350213	1	-0.53495	-0.843446	0	P78318	P78318	Immunoglobulin-binding protein 1	IGBP1
27.9611	28.4506	26.569	27.882	28.0556	27.8238			0.173578	1	-0.260253	-0.458292	0	P78344;D3DQV9;H0Y3P2;H0YCH5;E9PKF8;H0YD77;H0YEC5;H0YE22;H0YEN8;H0YDC0;H0YCF8;H0YE87;H0YEI7;H0YD99;H0YE44	P78344;D3DQV9;H0Y3P2	Eukaryotic translation initiation factor 4 gamma 2	EIF4G2
27.6749	28.1524	26.3047	27.1962	26.6119	26.3998			0.459292	0.998128	0.641343	1.06398	0	P78346;Q5VU11;Q5VU10	P78346;Q5VU11;Q5VU10	Ribonuclease P protein subunit p30	RPP30
28.1273	28.9023	26.9451	28.259	28.5106	28.4199			0.284596	1	-0.404936	-0.705739	0	P78347;A0A494C1K3;A0A494C0Q7;C9J6M0;A0A087WW90;A0A0D9SF80;A0A494C0I1;A0A494C1N8;Q86UP8;Q6EKJ0	P78347;A0A494C1K3	General transcription factor II-I	GTF2I
31.2403	31.3528	30.4632	31.3348	31.1673	31.5012			0.460811	0.999712	-0.31564	-1.067	0	P78371;F5GWF6;F8VQ14	P78371;F5GWF6;F8VQ14	T-complex protein 1 subunit beta	CCT2
28.8376	29.1731	27.8212	28.8519	28.7753	28.7797			0.178931	1	-0.191696	-0.470781	0	P78406;E9PQ57;E9PPG9;B0QZ36;B0QZ37	P78406;E9PQ57;E9PPG9	mRNA export factor	RAE1
29.4451	29.1026	29.3654	29.8538	29.5722	29.9693			1.46156	0.140244	-0.494049	-3.14894	0	P78417;Q5TA02;Q5TA01	P78417;Q5TA02;Q5TA01	Glutathione S-transferase omega-1	GSTO1
30.4447	30.7502	29.5974	30.4357	30.3709	30.3929			0.146094	1	-0.135739	-0.393035	0	P78527;F5GX40;H0YG84	P78527	DNA-dependent protein kinase catalytic subunit	PRKDC
27.5761	28.193	26.9552	28.1877	28.5637	28.726			1.10286	0.268569	-0.917702	-2.34539	0	P78540	P78540	Arginase-2, mitochondrial	ARG2
25.293	26.104	25.3812	28.6994	27.8889	28.0756	+	3ha_huvec	2.7508	0.00885714	-2.62858	-7.40414	0	P80297;P02795;P13640;H3BSF1;U3KQD7;CON__P67983;P80294;P04731;Q8N339;P04732	P80297;P02795;P13640	Metallothionein-1X;Metallothionein-2;Metallothionein-1G	MT1X;MT2A;MT1G
27.9268	28.3351	26.395	27.4744	27.0551	27.5978			0.103658	1	0.176516	0.287983	0	P80303;E9PKG6;Q2L696;H0YEG8;E9PLR0;E9PLE9;A0A2R8Y6G7;E9PJP3;E9PM22;H0YD18	P80303;E9PKG6;Q2L696;H0YEG8	Nucleobindin-2;Nesfatin-1	NUCB2;Nucb2
27.1474	27.2621	25.7592	26.417	26.8577	26.6238			0.0626629	1	0.090086	0.180359	0	P82673;H0YG82	P82673;H0YG82	28S ribosomal protein S35, mitochondrial	MRPS35
27.8319	27.8711	27.3034	27.3862	27.5249	26.2205			0.62116	0.761953	0.624928	1.38162	0	P82909;D6R941	P82909	28S ribosomal protein S36, mitochondrial	MRPS36
29.0605	28.6597	28.7786	29.2002	29.2031	29.036			1.12485	0.253345	-0.313464	-2.39187	0	P82979;F8VZQ9;H0YHG0;F8VS12	P82979;F8VZQ9;H0YHG0	SAP domain-containing ribonucleoprotein	SARNP
28.0907	28.3911	25.8523	27.8657	27.8344	27.8831			0.200226	1	-0.416396	-0.519822	0	P83436	P83436	Conserved oligomeric Golgi complex subunit 7	COG7
31.4447	31.1558	31.5264	32.4324	32.0226	32.3452	+	3ha_huvec	2.21832	0.0428889	-0.891136	-5.30934	0	P84090;G3V279	P84090;G3V279	Enhancer of rudimentary homolog	ERH
27.6223	28.2995	25.8663	27.3639	27.7414	27.8295			0.199117	1	-0.38227	-0.517294	0	P84095	P84095	Rho-related GTP-binding protein RhoG	RHOG
31.0861	31.9547	30.6652	30.689	30.7287	30.8725			0.543375	0.899142	0.471905	1.22977	0	P84103;A0A087X2D0	P84103;A0A087X2D0	Serine/arginine-rich splicing factor 3	SRSF3
26.5129	27.0921	26.5856	27.1532	26.6155	26.4977			0.0312582	1	-0.0252139	-0.0927601	0	P98175	P98175	RNA-binding protein 10	RBM10
30.0675	30.2765	25.7503	29.8508	29.6094	30.0454			0.314003	1	-1.13713	-0.768056	0	P98179	P98179	RNA-binding protein 3	RBM3
27.008	27.7965	25.1066	27.4603	27.4342	27.5871			0.463019	0.997798	-0.856822	-1.07139	0	Q00059;H7BYN3	Q00059;H7BYN3	Transcription factor A, mitochondrial	TFAM
30.6778	30.3352	29.2769	30.5613	30.3813	30.4556			0.362889	1	-0.369421	-0.869533	0	Q00325;F8VWR4	Q00325	Phosphate carrier protein, mitochondrial	SLC25A3
27.2379	28.2783	26.5355	27.9585	27.3204	28.8315			0.439797	1	-0.686223	-1.02513	0	Q00403;B1APE1;B1APE2	Q00403;B1APE1;B1APE2	Transcription initiation factor IIB	GTF2B
27.8402	28.0123	26.398	28.1442	28.0381	28.4151			0.678269	0.658341	-0.782251	-1.49285	0	Q00534	Q00534	Cyclin-dependent kinase 6	CDK6
27.3541	28.185	24.2411	27.3605	27.1683	27.5027			0.246442	1	-0.750409	-0.62313	0	Q00535	Q00535	Cyclin-dependent-like kinase 5	CDK5
26.5184	27.1881	25.4221	27.066	26.8847	27.3725			0.615082	0.767327	-0.731526	-1.36978	0	Q00653	Q00653	Nuclear factor NF-kappa-B p100 subunit;Nuclear factor NF-kappa-B p52 subunit	NFKB2
29.7373	29.3159	29.4075	29.8217	29.6704	29.7189			0.857851	0.41685	-0.250104	-1.84543	0	Q00688;G3V5F2	Q00688	Peptidyl-prolyl cis-trans isomerase FKBP3	FKBP3
29.9057	30.384	28.3173	29.7976	29.5015	30.2744			0.185156	1	-0.322182	-0.485222	0	Q00796;A0A6I8PIS1;H0YKB3;A0A6I8PRA7	Q00796;A0A6I8PIS1	Sorbitol dehydrogenase	SORD
32.0112	31.9534	31.0234	32.2482	32.2327	32.1419			0.780974	0.493165	-0.544961	-1.69363	0	Q00839;A0A1W2PPS1;A0A1X7SBS1;A0A1W2PP35;Q5RI18;A0A1W2PPH7;A0A1W2PPL4;A0A1W2PP34;A0A1W2PQL0;A0A1W2PQ74;A0A1W2PRZ7;A0A1W2PQD4;A0A1W2PRI6;A0A1W2PPE9;A0A1W2PP22;A0A1W2PNG3;A0A087WVI9	Q00839;A0A1W2PPS1;A0A1X7SBS1;A0A1W2PP35;Q5RI18;A0A1W2PPH7;A0A1W2PPL4;A0A1W2PP34;A0A1W2PQL0	Heterogeneous nuclear ribonucleoprotein U	HNRNPU
29.4139	30.4911	28.1288	29.4674	28.4041	29.8619			0.0421333	1	0.100149	0.12367	0	Q01081;A0A1B0GW87;M0QYK5;M0R2N4;Q8WU68;K7EJH3;K7EJM7	Q01081	Splicing factor U2AF 35 kDa subunit	U2AF1
29.4672	29.5019	28.8326	29.4127	29.4565	29.4145			0.299206	1	-0.160635	-0.736835	0	Q01082;A0A087WUZ3;F8W6C1;P11277	Q01082;A0A087WUZ3	Spectrin beta chain, non-erythrocytic 1	SPTBN1
28.3546	28.9628	26.6102	28.5705	28.6935	28.365			0.327864	1	-0.567137	-0.797078	0	Q01085;E7ETJ9;E7ETC0;A6NKZ9	Q01085;E7ETJ9;E7ETC0	Nucleolysin TIAR	TIAL1
31.5872	31.2667	30.5431	31.8302	31.7413	31.6033			0.873508	0.402886	-0.592597	-1.87657	0	Q01105;A0A0C4DFV9;P0DME0	Q01105;A0A0C4DFV9	Protein SET	SET
30.4212	30.0976	29.9144	31.0225	30.9071	30.9987	+	3ha_huvec	2.26239	0.0441143	-0.831675	-5.46139	0	Q01469;I6L8B7;A8MUU1	Q01469;I6L8B7	Fatty acid-binding protein, epidermal	FABP5
31.4712	30.8047	31.3528	31.8493	31.8519	32.0572			1.51499	0.141094	-0.709886	-3.27829	0	Q01518;Q5T0R1;Q5T0R7;Q5T0R6;Q5T0R5;Q5T0R4;Q5T0R3;Q5T0R2;Q5T0R9;Q5T0S3;Q5T0R8	Q01518;Q5T0R1	Adenylyl cyclase-associated protein 1;Adenylyl cyclase-associated protein	CAP1
27.1275	28.0133	26.0884	25.3544	27.2549	27.5738			0.145867	1	0.34871	0.392486	0	Q01650	Q01650	Large neutral amino acids transporter small subunit 1	SLC7A5
27.9534	28.7144	26.747	27.6927	27.4626	28.2341			0.00452515	1	0.00852394	0.0138212	0	Q01780;K7EJ37	Q01780	Exosome component 10	EXOSC10
29.1498	29.7482	28.2615	29.339	29.4108	29.2458			0.254762	1	-0.278683	-0.641332	0	Q01813;A0A7I2V3Z0;B1APP6;Q5VSR5;H0Y757;V9GYV7;V9GY25;A0A7I2V5S1;H0Y3Y3	Q01813;A0A7I2V3Z0;B1APP6	ATP-dependent 6-phosphofructokinase, platelet type	PFKP
28.0963	28.2717	26.8795	28.3299	28.0717	28.0465			0.375472	1	-0.400232	-0.89529	0	Q01970	Q01970	1-phosphatidylinositol 4,5-bisphosphate phosphodiesterase beta-3	PLCB3
29.425	29.919	27.9865	29.7232	29.6067	29.7366			0.425147	1	-0.578677	-0.995794	0	Q02252;G3V4Z4	Q02252;G3V4Z4	Methylmalonate-semialdehyde dehydrogenase [acylating], mitochondrial	ALDH6A1
26.4722	27.2167	25.088	27.3015	26.9494	26.366			0.378251	1	-0.613316	-0.90096	0	Q02338;E9PCG9;H7C2W1;C9K0G7;C9JM78;C9JQ90;A0A0G2JRX6;C9JEB9	Q02338;E9PCG9	D-beta-hydroxybutyrate dehydrogenase, mitochondrial	BDH1
27.888	28.4086	27.3647	28.6761	28.3057	28.8197			0.989633	0.32817	-0.713422	-2.11065	0	Q02750;H3BRW9	Q02750	Dual specificity mitogen-activated protein kinase kinase 1	MAP2K1
30.1274	29.8578	30.0632	30.3967	30.3207	30.2423			1.51383	0.139898	-0.303773	-3.27544	0	Q02790;F5H1U3;H0YFG2;F5H120	Q02790	Peptidyl-prolyl cis-trans isomerase FKBP4;Peptidyl-prolyl cis-trans isomerase FKBP4, N-terminally processed	FKBP4
27.0562	27.9316	25.6325	27.2231	26.8658	26.6508			0.0191677	1	-0.0397739	-0.057607	0	Q02809;Q5JXB7;Q5JXB8	Q02809	Procollagen-lysine,2-oxoglutarate 5-dioxygenase 1	PLOD1
31.5929	31.3683	29.0267	31.8538	31.4582	31.7407			0.544733	0.899465	-1.02158	-1.23242	0	Q02878;F8VZ45;U3KQR5;F8VR69;F8VZA3;F8VWR1;F8VU16	Q02878	60S ribosomal protein L6	RPL6
28.508	28.6333	24.4687	28.7824	27.8529	28.4411			0.343041	1	-1.15549	-0.828621	0	Q03154;A0A1B0GW23;A0A1B0GU86;C9JMV9;A0A1B0GV31;A0A1B0GVA5;C9JYZ0;F8WC59;A0A1B0GTG3;A0A1B0GVZ3;A0A1B0GVG0;A0A1B0GU36;A0A1B0GUT4	Q03154;A0A1B0GW23;A0A1B0GU86;C9JMV9;A0A1B0GV31;A0A1B0GVA5	Aminoacylase-1	ACY1;ABHD14A-ACY1
29.3613	29.0415	28.4877	29.4053	29.2989	29.4267			0.733791	0.551488	-0.413474	-1.60119	0	Q03252	Q03252	Lamin-B2	LMNB2
26.1484	27.3501	25.7673	27.0743	27.067	26.5171			0.381549	1	-0.464188	-0.907682	0	Q03701	Q03701	CCAAT/enhancer-binding protein zeta	CEBPZ
26.7169	27.58	26.9277	26.9102	26.8701	27.0075			0.215121	1	0.14557	0.553555	0	Q04446;E9PGM4	Q04446;E9PGM4	1,4-alpha-glucan-branching enzyme	GBE1
29.8653	30.0678	28.948	29.9256	30.1089	30.2019			0.567185	0.858906	-0.451733	-1.27634	0	Q04760	Q04760	Lactoylglutathione lyase	GLO1
30.047	30.015	25.2897	31.2932	31.1028	30.9558			0.776107	0.499031	-2.6667	-1.68407	0	Q04828;H0Y804;A6NHU4	Q04828;H0Y804	Aldo-keto reductase family 1 member C1	AKR1C1
29.8581	29.1283	29.4159	29.3943	29.1083	29.3401			0.335283	1	0.186586	0.812525	0	Q04837;A0A0G2JLD8;E7EUY5;C9K0U8	Q04837;A0A0G2JLD8;E7EUY5;C9K0U8	Single-stranded DNA-binding protein, mitochondrial	SSBP1
29.8001	30.2054	29.4934	30.2297	30.458	30.4351			1.16453	0.245759	-0.541348	-2.47653	0	Q04917;A2IDB2;F8WEB6;A2IDB1	Q04917;A2IDB2	14-3-3 protein eta	YWHAH
27.7778	28.327	25.3025	28.0209	27.928	27.5174			0.294961	1	-0.686352	-0.727827	0	Q05048;A0A0A0MSZ9;A3KFI9	Q05048;A0A0A0MSZ9	Cleavage stimulation factor subunit 1	CSTF1
29.2749	29.2679	28.5753	29.0812	29.0477	28.9497			0.0186109	1	0.0131728	0.0559671	0	Q5T760;Q05519;B4DWT1;Q5T757	Q5T760;Q05519	Serine/arginine-rich splicing factor 11	SRSF11
27.3461	27.7634	27.3944	27.5342	27.4092	27.47			0.077815	1	0.0301927	0.22094	0	Q06124;A0A1W2PPU4;A0A0U1RRI0;H0YF12	Q06124;A0A1W2PPU4	Tyrosine-protein phosphatase non-receptor type 11	PTPN11
28.0054	28.0452	26.9346	28.2466	27.9397	28.052			0.484966	0.961396	-0.417667	-1.11488	0	Q06203;D6RCC8;D6RE15	Q06203	Amidophosphoribosyltransferase	PPAT
30.2339	30.2464	29.4435	30.4509	30.3437	30.5049			0.78424	0.490786	-0.458612	-1.70004	0	Q06210;A0A6I8PRN4;A0A6I8PTT9;O94808;A0A6I8PRT6;E5RJP4	Q06210;A0A6I8PRN4;A0A6I8PTT9	Glutamine--fructose-6-phosphate aminotransferase [isomerizing] 1	GFPT1
30.1316	30.6248	29.6455	30.3231	30.2049	30.1235			0.1038	1	-0.0832113	-0.288343	0	Q06323;H0YLU2;H0YKK6	Q06323	Proteasome activator complex subunit 1	PSME1
27.7882	28.6583	26.8713	27.6939	27.998	27.9117			0.0632298	1	-0.0952765	-0.181896	0	Q06587;X6RFN3;Q99496	Q06587	E3 ubiquitin-protein ligase RING1	RING1
33.1788	33.5802	32.4843	33.4722	33.618	33.6602			0.705123	0.601759	-0.502368	-1.54521	0	Q06830;A0A0A0MSI0;A0A0A0MRQ5	Q06830;A0A0A0MSI0	Peroxiredoxin-1	PRDX1
31.8874	32.7353	29.3136	31.982	31.9635	31.7888			0.227615	1	-0.599335	-0.581519	0	Q07021	Q07021	Complement component 1 Q subcomponent-binding protein, mitochondrial	C1QBP
27.4681	25.5469	27.1615	28.4306	28.8109	27.5492			1.02669	0.314157	-1.53808	-2.18668	0	Q07065	Q07065	Cytoskeleton-associated protein 4	CKAP4
30.146	29.035	25.4631	30.5138	30.513	30.7584			0.775122	0.499333	-2.38034	-1.68214	0	Q07666;A0A6Q8PGH5;O75525;Q5VWX1	Q07666	KH domain-containing, RNA-binding, signal transduction-associated protein 1	KHDRBS1
29.1019	29.6445	29.3663	28.7585	28.8495	28.8699			1.56361	0.132748	0.544945	3.39852	0	Q07812;K4JQN1	Q07812	Apoptosis regulator BAX	BAX
29.0093	29.5128	27.5514	29.1497	29.3006	29.0652			0.334906	1	-0.480659	-0.811742	0	Q07960;H0YE29;E9PNR6	Q07960;H0YE29;E9PNR6	Rho GTPase-activating protein 1	ARHGAP1
25.6799	26.1802	26.5699	27.7112	27.5483	27.2854			2.06226	0.0594286	-1.37163	-4.79743	0	Q08209;E7ETC2;E9PPC8;E9PK68;Q5F2F8;P16298;H0YC26;P48454	Q08209;E7ETC2;E9PPC8;E9PK68	Serine/threonine-protein phosphatase 2B catalytic subunit alpha isoform;Serine/threonine-protein phosphatase	PPP3CA
31.2507	30.941	30.8629	31.5027	31.293	31.5659			1.40648	0.151229	-0.435639	-3.01851	0	Q08211	Q08211	ATP-dependent RNA helicase A	DHX9
29.6054	29.7645	28.9551	29.5824	29.7336	29.5405			0.2802	1	-0.177181	-0.696329	0	Q08257;A6NP24;C9JH92	Q08257;A6NP24;C9JH92	Quinone oxidoreductase	CRYZ
27.8496	28.4969	25.2886	27.9356	27.9519	27.4945			0.230382	1	-0.582345	-0.587673	0	Q08378;A0A087WV43;A0A494C129	Q08378	Golgin subfamily A member 3	GOLGA3
29.7768	30.3463	28.9583	29.6218	29.4402	29.9078			0.0293965	1	0.0371641	0.0874029	0	Q08380;K7EP36;K7ESM3;K7EKQ5;K7ERZ6;K7EJD3;K7ES75;K7EN99;K7EQT9;K7EJY8	Q08380	Galectin-3-binding protein	LGALS3BP
27.3217	28.0364	24.8099	27.3128	27.2648	27.5603			0.267153	1	-0.656663	-0.668239	0	Q08426;C9JJE0	Q08426	Peroxisomal bifunctional enzyme;Enoyl-CoA hydratase/3,2-trans-enoyl-CoA isomerase;3-hydroxyacyl-CoA dehydrogenase	EHHADH
28.147	29.2647	27.2034	28.5646	28.4039	27.8598			0.0380897	1	-0.071029	-0.112252	0	Q08752;H0Y8J0	Q08752	Peptidyl-prolyl cis-trans isomerase D	PPID
29.5918	29.3148	29.6399	29.7043	29.7737	29.6845			0.914423	0.374279	-0.205322	-1.95838	0	Q08945;E9PMD4;A0A0U1RRK2;E9PPZ7	Q08945	FACT complex subunit SSRP1	SSRP1
26.8576	27.5348	25.9825	26.9083	27.184	26.7724			0.128774	1	-0.163262	-0.35084	0	Q08AM6;H3BUU8;A0A087WT26;H3BQD9	Q08AM6	Protein VAC14 homolog	VAC14
28.2015	28.6008	27.644	28.3299	28.4091	28.6502			0.462367	0.9977	-0.314305	-1.07009	0	Q08J23;A0A140T9Y7	Q08J23	tRNA (cytosine(34)-C(5))-methyltransferase	NSUN2
30.3959	31.1132	27.776	30.3478	30.6421	30.5215			0.295572	1	-0.742111	-0.729125	0	Q09028;H0YF10;H0YCT5;H0YDK2;H0YEU5;C9JPP3;E9PNS6;E9PNS2;E9PND5;E9PIC4	Q09028;H0YF10;H0YCT5;H0YDK2	Histone-binding protein RBBP4	RBBP4
27.9052	28.495	27.5067	28.0962	28.4014	28.8471			0.594445	0.802624	-0.479266	-1.32955	0	Q09161;X6R941;F2Z2T1	Q09161	Nuclear cap-binding protein subunit 1	NCBP1
30.4974	31.1469	29.8247	30.6486	30.8224	30.611			0.203647	1	-0.204292	-0.527609	0	Q09666;E9PQE3;E9PJZ0;E9PKR9;E9PJC6;E9PLK4	Q09666	Neuroblast differentiation-associated protein AHNAK	AHNAK
28.3912	28.8198	26.9102	27.7172	28.4926	28.4105			0.0945717	1	-0.166388	-0.264702	0	Q0VDF9;H7C2A1	Q0VDF9	Heat shock 70 kDa protein 14	HSPA14
27.718	27.6122	25.0463	27.7078	27.5402	27.485			0.376115	1	-0.785477	-0.896601	0	Q10567;C9J1E7	Q10567;C9J1E7	AP-1 complex subunit beta-1	AP1B1
27.0817	27.9864	26.2566	27.1689	27.4216	27.2303			0.119279	1	-0.165391	-0.327321	0	Q10570;E9PIM1;A0A087X101	Q10570	Cleavage and polyadenylation specificity factor subunit 1	CPSF1
27.989	28.5431	26.8229	28.1092	27.7347	27.855			0.0777961	1	-0.114609	-0.22089	0	Q10713;Q5SXN9	Q10713	Mitochondrial-processing peptidase subunit alpha	PMPCA
28.2185	27.6872	27.0152	28.0424	28.4826	28.464			0.850304	0.416861	-0.689419	-1.83044	0	Q12765;B8ZZP4;C9J7U9;C9K052	Q12765;B8ZZP4;C9J7U9;C9K052	Secernin-1	SCRN1
26.8782	27.8704	24.9137	27.0683	26.9803	27.3413			0.262287	1	-0.575853	-0.6577	0	Q12768;E7EQI7;E5RFU6	Q12768;E7EQI7	WASH complex subunit strumpellin	KIAA0196
28.2248	28.1659	27.25	28.1374	27.9648	28.0833			0.221619	1	-0.181613	-0.568136	0	Q12788;J3KNP2;A0A087WYP7	Q12788;J3KNP2	Transducin beta-like protein 3	TBL3
27.5803	27.7923	25.4236	27.2982	27.2443	27.3371			0.181554	1	-0.361086	-0.476878	0	Q12789;H3BU37	Q12789	General transcription factor 3C polypeptide 1	GTF3C1
29.0683	29.1311	26.9832	29.2524	29.4237	29.685			0.670635	0.674479	-1.05952	-1.47798	0	Q12792;F8VS81;F8W1Q9;F8VRG3	Q12792;F8VS81	Twinfilin-1	TWF1
27.6468	27.9395	27.1125	27.8045	27.8948	27.487			0.234821	1	-0.16245	-0.597518	0	Q12797;E5RG29;E5RG56;E5RHJ2;E5RHK2;G3XAN5;A0A087WUJ2	Q12797	Aspartyl/asparaginyl beta-hydroxylase	ASPH
25.6575	27.3271	24.9059	26.9923	27.2855	26.1695			0.467011	0.989409	-0.852261	-1.07931	0	Q12800;F8VWL0;F8VX55;Q9NZI6	Q12800;F8VWL0;F8VX55	Alpha-globin transcription factor CP2	TFCP2
31.2805	31.6282	30.3962	31.5756	31.5936	31.6276			0.607467	0.777849	-0.497311	-1.35494	0	Q12864;E7EN24;E5RJT3;H0YBL0	Q12864;E7EN24	Cadherin-17	CDH17
28.4606	28.9385	27.7823	28.4573	28.4231	28.5863			0.100699	1	-0.0950998	-0.280434	0	Q12874	Q12874	Splicing factor 3A subunit 3	SF3A3
28.7815	29.5522	28.8528	29.2668	29.2002	28.9708			0.116321	1	-0.0837345	-0.319937	0	Q12888;A6NNK5;C9JXV0;H7C3N7;M0R142;H7BZY0	Q12888;A6NNK5	Tumor suppressor p53-binding protein 1	TP53BP1
29.4646	29.8457	27.6934	29.5732	29.4602	29.5768			0.33223	1	-0.535475	-0.806175	0	Q12904;A0A804HJ47;A0A5F9ZHC5;D6R937	Q12904;A0A804HJ47;A0A5F9ZHC5	Aminoacyl tRNA synthase complex-interacting multifunctional protein 1;Endothelial monocyte-activating polypeptide 2	AIMP1
31.0308	31.2978	29.5911	31.0627	31.2712	31.1333			0.410707	1	-0.515804	-0.966755	0	Q12906;K7EKJ9;K7EQR9;K7ER69;K7EM82;K7EJ09;K7EKY0;K7EPG3;K7ERM6;K7ENK6;K7EQ75;K7ELV3	Q12906	Interleukin enhancer-binding factor 3	ILF3
27.5635	25.8641	27.5935	28.4098	28.3026	28.4025			1.12074	0.256733	-1.36458	-2.38316	0	Q12907;D6RBV2;D6RIU4;D6RDX1;D6RBH1	Q12907;D6RBV2;D6RIU4;D6RDX1	Vesicular integral-membrane protein VIP36	LMAN2
30.38	30.8924	28.8538	30.2852	30.3169	30.3707			0.174531	1	-0.282198	-0.46052	0	Q12931;I3L0K7;I3L239;I3L253;I3L2D5	Q12931;I3L0K7	Heat shock protein 75 kDa, mitochondrial	TRAP1
27.9549	28.6151	27.1293	27.9616	28.0134	27.8577			0.0348267	1	-0.0445086	-0.102974	0	Q12955;A0A087WTF3;A0A087WZ65;H0Y3A4;D6RHY3;A0A669KB19;A0A5F9ZHN0;A0A087X0B4;A0A5F9ZH03;A0A5F9ZI08;A0A5F9ZHE2;A0A5F9ZHT8;A0A5F9ZHQ3;A0A5F9ZI36;A0A5F9ZHL3;A0A5F9ZH17;A0A5F9ZHF7;A0A5F9ZHT4;A0A5F9ZI46;A0A5F9ZH18;H0Y8Y2;A0A5F9ZH99;A0A087WWI5;A0A5F9ZI16;A0A087WZ26;A0A087WTE8;A0A087WX55;A0A087WY90;H0YA66;B1AQT1;H0Y9E9;H0YAH5;H0Y951;A0A5F9ZHV4;A0A087WVC2;A0A5F9ZI41;A0A5K1VW73;H0Y931;A0A5F9ZH10;E9PCH6	Q12955;A0A087WTF3	Ankyrin-3	ANK3
27.0625	27.7174	27.1061	27.502	27.288	27.3493			0.141756	1	-0.0844568	-0.382549	0	Q12972;A0A0A0MT09	Q12972;A0A0A0MT09	Nuclear inhibitor of protein phosphatase 1;Activator of RNA decay	PPP1R8
27.9075	27.7486	27.6064	27.7768	27.8027	28.0763			0.433817	1	-0.131092	-1.01317	0	Q12974;Q93096	Q12974	Protein tyrosine phosphatase type IVA 2	PTP4A2
27.6127	27.9237	27.2167	27.066	27.4329	27.5333			0.409724	1	0.240275	0.964773	0	Q12996;E9PLP8;E9PJ06;H0YE74	Q12996;E9PLP8	Cleavage stimulation factor subunit 3	CSTF3
30.1615	29.9271	28.307	29.9519	29.9166	30.3323			0.430344	1	-0.601759	-1.00621	0	Q13011;M0R248;M0QZW4	Q13011;M0R248	Delta(3,5)-Delta(2,4)-dienoyl-CoA isomerase, mitochondrial	ECH1
28.4514	28.2793	27.8268	28.0181	28.025	27.877			0.479631	0.973066	0.212493	1.10432	0	Q13033;G3V3G7;G3V340	Q13033	Striatin-3	STRN3
28.3611	28.7886	27.0949	28.2262	28.1416	28.3608			0.114297	1	-0.161372	-0.314867	0	Q13045;J3QQQ2;J3QLR6;K7EP37;J3QQU5;K7EP27;K7EQZ7;J3KT47	Q13045	Protein flightless-1 homolog	FLII
27.6272	28.2589	26.1003	27.2273	27.3902	27.1264			0.0427103	1	0.0808538	0.125292	0	Q13049;Q5JVY0	Q13049	E3 ubiquitin-protein ligase TRIM32	TRIM32
28.9857	28.7473	28.3978	28.6974	28.8749	29.3958			0.443498	1	-0.279098	-1.03252	0	Q13057;K7ES73;K7EN91;K7ESK6;K7EP09;K7EPT0;K7EQ60;K7EPC2	Q13057	Bifunctional coenzyme A synthase;Phosphopantetheine adenylyltransferase;Dephospho-CoA kinase	COASY
27.5885	28.1117	26.0129	27.7352	27.5312	27.7399			0.272303	1	-0.431057	-0.679357	0	Q13085;Q59FY4;A0A0C4DGT1;A0A087X2F8;A0A087WYS8;A0A087X126	Q13085	Acetyl-CoA carboxylase 1;Biotin carboxylase	ACACA
27.2347	28.3089	25.1012	26.9623	26.6745	26.6559			0.0421716	1	0.117324	0.123778	0	Q13123;E7EQZ7;D6REL4;D6RAY9;A0A0C4DGW5	Q13123;E7EQZ7	Protein Red	IK
29.7165	29.8923	27.9974	29.7902	30.2055	30.1176			0.606624	0.77785	-0.835679	-1.35329	0	Q13126;B4DUC8;J3QSB7;F2Z2F3;F8WES2;A0A2R8Y4K0;J3KRN1	Q13126;B4DUC8;J3QSB7;F2Z2F3	S-methyl-5-thioadenosine phosphorylase;Purine nucleoside phosphorylase	MTAP
32.5791	32.6823	29.8692	31.4738	32.5174	32.1747			0.130641	1	-0.345067	-0.355432	0	Q13131;Q96E92;A0A087WXX9;P54646	Q13131	5-AMP-activated protein kinase catalytic subunit alpha-1	PRKAA1
25.7294	26.909	24.6675	25.9576	25.9634	25.7225			0.0597908	1	-0.112538	-0.172551	0	Q13136;A0A2R8Y7R9;E9PJZ7;A0A1B0GVT3;H0YEF9;H0YDW2;G3V200;O75334;E9PPF6;O75145;H0YHJ4;H0YD72;H0YIJ4;F8VWR9;R4GNF1;R4GN36;H0YHK3;B1APN9;O75335;E9PID5	Q13136;A0A2R8Y7R9	Liprin-alpha-1	PPFIA1
30.5104	30.8195	29.2369	30.6801	30.5691	30.8002			0.432666	1	-0.49419	-1.01087	0	Q13151	Q13151	Heterogeneous nuclear ribonucleoprotein A0	HNRNPA0
27.7989	28.4011	26.5487	27.8204	27.897	27.5989			0.125281	1	-0.189182	-0.342221	0	Q13153;B3KNX7;E9PM17;H0YCG5;H0YCM0;E9PJF8;E9PRP6;E9PMP2;E9PQW5;E9PKH9	Q13153;B3KNX7;E9PM17	Serine/threonine-protein kinase PAK 1;Non-specific serine/threonine protein kinase	PAK1
29.3807	29.4692	29.0018	29.749	29.2837	29.3509			0.36254	1	-0.177268	-0.868816	0	Q13155;A8MU58;F8WCL2	Q13155;A8MU58	Aminoacyl tRNA synthase complex-interacting multifunctional protein 2	AIMP2
29.1047	29.1874	27.819	28.8037	28.9522	28.8632			0.140883	1	-0.169319	-0.380432	0	Q13162;H7C3T4;A6NG45;A6NJJ0	Q13162;H7C3T4	Peroxiredoxin-4	PRDX4
28.3125	28.6437	27.2875	28.4249	28.4904	28.7388			0.488203	0.961138	-0.4701	-1.12127	0	Q13177;H7C1X3	Q13177	Serine/threonine-protein kinase PAK 2;PAK-2p27;PAK-2p34	PAK2
30.5729	30.7252	30.1218	31.2177	31.6534	31.5612			1.9566	0.0769825	-1.00414	-4.47278	0	Q13185;C9JMM0;B8ZZ43;S4R2Y4	Q13185	Chromobox protein homolog 3	CBX3
29.7115	30.2908	28.3649	29.7764	29.85	29.9728			0.289547	1	-0.410686	-0.716308	0	Q13200;H7C1H2;C9JPC0;H7C2Q3;F8WBS8	Q13200	26S proteasome non-ATPase regulatory subunit 2	PSMD2
27.5191	27.9823	26.7057	28.2078	28.271	27.8492			0.828498	0.441716	-0.706975	-1.78726	0	Q13217;X6R9L0	Q13217;X6R9L0	DnaJ homolog subfamily C member 3	DNAJC3
29.6523	30.2693	29.3419	30.5886	30.7148	30.6309			1.49788	0.13977	-0.890282	-3.23656	0	Q13228;A6PVX1;H0Y532;F2Z2W8;F8WCR4;C9JVL0;F8WBA9	Q13228;A6PVX1;H0Y532	Selenium-binding protein 1	SELENBP1
29.484	29.91	28.5076	29.3454	29.6361	29.6208			0.212978	1	-0.233592	-0.54873	0	Q13242;H0YIB4;S4R3G0	Q13242;H0YIB4;S4R3G0	Serine/arginine-rich splicing factor 9	SRSF9
28.7351	28.9603	29.11	29.663	29.0975	29.0019			0.613842	0.768252	-0.318981	-1.36736	0	Q13243;B4DJK0;B4DUA4;G3V5K8	Q13243;B4DJK0;B4DUA4;G3V5K8	Serine/arginine-rich splicing factor 5	SRSF5
31.1679	31.5201	30.3065	31.2594	31.2861	31.1086			0.237209	1	-0.219839	-0.602799	0	Q13263;M0R3C0;M0R2I3	Q13263	Transcription intermediary factor 1-beta	TRIM28
29.6725	30.0774	28.6506	29.6984	29.7384	29.9978			0.325845	1	-0.344716	-0.792864	0	Q13283;A0A7I2V5M7;A0A7I2YQN9;A0A7P0P2U7;A0A7I2YQU8;A0A7I2V651;A0A7I2YQH0;E5RH42;A0A7I2V2S5;E5RJU8;E5RIF8;A0A7I2V2X7;E5RH00;A0A7I2V4Y8;A0A7I2V548;A0A7I2V3C4;A0A7I2V565;A0A7I2YQF2;A0A7I2V2V1;A0A7I2YQQ8;A0A7I2YQB1;A0A7I2V5H1;A0A7I2V496;A0A7I2V326;A0A7I2V494;A0A7I2V4D8;A0A7I2YQM1;A0A7I2V533	Q13283;A0A7I2V5M7;A0A7I2YQN9;A0A7P0P2U7;A0A7I2YQU8;A0A7I2V651	Ras GTPase-activating protein-binding protein 1	G3BP1
28.7374	29.4038	27.3795	28.518	28.8892	28.8571			0.152368	1	-0.247864	-0.408107	0	Q13308;H0Y8F1;Q86X91;C9JQR6;H7C5L0;F8WDG7;C9J9E8	Q13308	Inactive tyrosine-protein kinase 7	PTK7
28.1683	29.0873	27.3482	27.9668	27.8741	27.7831			0.25717	1	0.326587	0.646579	0	Q13363;D6RAX2;E9PGB1;E7ESU7;E7EPF8;H0Y8W7;E7EUB3;H0Y9M9	Q13363;D6RAX2;E9PGB1;E7ESU7;E7EPF8	C-terminal-binding protein 1	CTBP1
28.8796	29.0916	25.4665	29.1379	29.1932	29.76			0.580336	0.830513	-1.55113	-1.30202	0	Q13404;I3L0A0;G3V2F7;A0A0A0MSL3;E5RIF1;D6RG00;H0YBX6	Q13404;I3L0A0;G3V2F7;A0A0A0MSL3	Ubiquitin-conjugating enzyme E2 variant 1	UBE2V1;TMEM189-UBE2V1
29.0237	29.2948	28.0607	29.2198	29.2037	29.5061			0.597212	0.796888	-0.516801	-1.33495	0	Q13409;E7EV09;E7EQL5;E7EMU4;E7EQU2;E7ESD3;E7ETL8;E7ERR6;E7ERH4;E7ET01;E9PGG1;E7EUM4;E7EU01	Q13409;E7EV09;E7EQL5;E7EMU4	Cytoplasmic dynein 1 intermediate chain 2	DYNC1I2
28.6225	28.695	25.3796	28.4031	28.3463	28.7279			0.349862	1	-0.92674	-0.842722	0	Q13421;H3BR90	Q13421	Mesothelin;Megakaryocyte-potentiating factor;Mesothelin, cleaved form	MSLN
28.2532	29.0019	27.2772	28.2819	28.5072	28.327			0.143193	1	-0.194574	-0.386029	0	Q13423;A0A590UJM2;A0A590UK29;A0A590UK15;D6RAI5;D6RHU2;A0A590UJA4;A0A590UKC7	Q13423;A0A590UJM2;A0A590UK29;A0A590UK15	NAD(P) transhydrogenase, mitochondrial	NNT
28.0543	28.7104	27.2581	28.1501	28.2583	28.4265			0.251006	1	-0.270687	-0.633129	0	Q13425;A0A140TA73;H0YCS0;A0A0G2JM75;J3KT21;H7BY41	Q13425	Beta-2-syntrophin	SNTB2
28.3411	28.2179	27.5938	28.6085	28.6071	28.5984			1.12564	0.253873	-0.55371	-2.39355	0	Q13442;F8WBW6	Q13442	28 kDa heat- and acid-stable phosphoprotein	PDAP1
26.9732	27.305	25.5357	27.3063	27.2353	26.5591			0.292921	1	-0.428944	-0.723491	0	Q13451	Q13451	Peptidyl-prolyl cis-trans isomerase FKBP5;Peptidyl-prolyl cis-trans isomerase FKBP5, N-terminally processed	FKBP5
28.3426	29.4832	24.9265	28.8088	28.8749	28.9981			0.405375	1	-1.30982	-0.955997	0	Q13492;E9PI56;E9PKP6;E9PLJ8;E9PJT1;E9PK13;H0YCY1	Q13492	Phosphatidylinositol-binding clathrin assembly protein	PICALM
29.1488	29.4372	28.6213	29.4269	29.7704	29.7793			1.04327	0.305888	-0.58981	-2.22095	0	Q13501;E7EMC7;E9PFW8;E3W990;C9JRJ8;D6RBF1;C9J6J8	Q13501;E7EMC7	Sequestosome-1	SQSTM1
27.3109	26.5496	26.1156	27.4209	27.2657	27.6943			1.01363	0.31523	-0.8016	-2.15981	0	Q13505	Q13505	Metaxin-1	MTX1
27.2376	27.9761	26.2273	26.8708	26.6305	26.7843			0.306718	1	0.38517	0.752718	0	Q13523;H0YDJ3	Q13523;H0YDJ3	Serine/threonine-protein kinase PRP4 homolog	PRPF4B
28.4741	28.9331	27.4092	28.3521	28.7118	28.3376			0.156065	1	-0.194984	-0.416938	0	Q13526;K7EMU7;K7EN45;O15428	Q13526;K7EMU7;K7EN45	Peptidyl-prolyl cis-trans isomerase NIMA-interacting 1	PIN1
26.4758	27.1559	26.3953	26.2957	26.5208	26.117			0.610014	0.775678	0.364494	1.3599	0	Q13546;A0A7I2V404;A0A7I2V5Y1	Q13546	Receptor-interacting serine/threonine-protein kinase 1	RIPK1
28.9329	29.9287	27.8308	28.9522	28.9864	29.18			0.0823315	1	-0.142041	-0.232846	0	Q13547;Q5TEE2;E5RK19	Q13547;Q5TEE2	Histone deacetylase 1	HDAC1
29.5417	29.9731	27.9978	29.7757	29.9769	29.8812			0.514841	0.942619	-0.707108	-1.17377	0	Q13561;A0A7I2V4Y9;A0A7I2V4H4;A8K8J9;H0YI98;F8W1I6;F8VW18;A0A7I2V390;F8VRV7;H0YHL1;A0A7I2V5R4;F8W0U6;A0A7I2V2Z2	Q13561;A0A7I2V4Y9;A0A7I2V4H4;A8K8J9;H0YI98;F8W1I6;F8VW18;A0A7I2V390	Dynactin subunit 2	DCTN2
26.9647	27.5593	25.527	27.7566	28.0468	27.9585			0.949944	0.359399	-1.23697	-2.02997	0	Q13564;J3QRA5;H3BMR3;J3KRK3;H3BSS8;J3QLH4;J3KTE3	Q13564	NEDD8-activating enzyme E1 regulatory subunit	NAE1
27.2562	27.9697	27.5307	27.3858	27.7024	27.5797			0.0444045	1	0.0295607	0.130045	0	Q13572;G3V588;G3V5A3;G3V4M9;G3V3C0	Q13572;G3V588;G3V5A3;G3V4M9	Inositol-tetrakisphosphate 1-kinase	ITPK1
28.676	28.2116	28.4278	28.864	28.9076	29			1.59062	0.13032	-0.485399	-3.46641	0	Q13596;H0YK42;H0YK43;J3KPH4;H0YKD5;H0YKL5;H0YK58	Q13596;H0YK42	Sorting nexin-1	SNX1
27.4936	28.5238	27.0776	27.4797	27.6553	27.7992			0.0415122	1	0.053606	0.121922	0	Q13616;A0A590UJR3;A0A590UJ21;A0A0C4DGX4;A0A590UJ50;A0A590UJC4;A0A590UK34;A0A590UJ56;A0A590UJM8;A0A590UJA0;A0A590UJ97;A0A590UJ59	Q13616;A0A590UJR3;A0A590UJ21;A0A0C4DGX4;A0A590UJ50;A0A590UJC4;A0A590UK34;A0A590UJ56	Cullin-1	CUL1
28.044	28.002	26.3958	27.4749	27.5958	27.7178			0.0741929	1	-0.115607	-0.21133	0	Q13618;A0A087WTG3;H7C1L6;A0A087X1R9;H7C399	Q13618;A0A087WTG3	Cullin-3	CUL3
27.5732	28.3854	25.8004	28.0957	27.9078	28.186			0.455015	1	-0.810183	-1.05547	0	Q13619;A0A0A0MR50;A0A087WWN2	Q13619;A0A0A0MR50	Cullin-4A	CUL4A
28.7235	28.113	28.122	28.7449	28.7201	28.5037			0.711876	0.585164	-0.336701	-1.55839	0	Q13630;E9PKL9;E9PP14;A0A0J9YX13;E9PLH9;E9PP60;H0YE90;H0YCP7	Q13630;E9PKL9;E9PP14;A0A0J9YX13;E9PLH9	GDP-L-fucose synthase	TSTA3
27.2197	28.0514	24.7932	27.4247	28.0245	27.3869			0.390023	1	-0.923972	-0.924915	0	Q13724;A0A3B3IRK6;A0A3B3IRW2;A0A3B3IS52;A0A3B3ITC1;C9JDQ1;A0A3B3ITU6;B8ZZE2;A0A3B3IRI7;B4E3B8	Q13724;A0A3B3IRK6;A0A3B3IRW2;A0A3B3IS52	Mannosyl-oligosaccharide glucosidase	MOGS
29.8094	30.1264	28.8024	29.6873	29.7626	29.8214			0.167079	1	-0.177675	-0.443036	0	Q13813;A0A0D9SF54;A0A0D9SGF6;A0A0D9SFF6;A0A0D9SFH4;A0A5F9ZHC3;A0A1B0GUH3;A0A1B0GV13	Q13813;A0A0D9SF54;A0A0D9SGF6	Spectrin alpha chain, non-erythrocytic 1	SPTAN1
31.7734	32.2612	30.659	31.7504	31.7261	31.7393			0.135378	1	-0.174057	-0.367032	0	Q13838;Q5STU3;A0A0G2JJZ9;F6WLT2;A0A140T9X3;F6TRA5;A0A0A0MT12;F6S4E6;A0A140TA18;F6UJC5;A0A140T996;A0A140T9X9;A0A140T9K1;A0A140T973;A0A140T9L4;F6QYI9;F6R6M7;A0A0G2JJL7;H0YCC6;F6U6E2;A0A0G2JHN7;F6S2B7;A0A140T9N3;A0A140T9K2	Q13838;Q5STU3;A0A0G2JJZ9;F6WLT2;A0A140T9X3;F6TRA5;A0A0A0MT12;F6S4E6;A0A140TA18;F6UJC5;A0A140T996;A0A140T9X9	Spliceosome RNA helicase DDX39B	DDX39B
27.4262	27.474	24.3936	27.3759	27.6734	27.5921			0.472899	0.979087	-1.11584	-1.09099	0	Q13867;K7ESE8;J3KSD8;K7ES02;J3KS79;K7ENH5	Q13867;K7ESE8;J3KSD8;K7ES02	Bleomycin hydrolase	BLMH
28.3687	28.7302	26.5349	28.331	28.15	28.4264			0.245124	1	-0.424495	-0.620238	0	Q13868;A3KFL2;A3KFL5;A3KFL1	Q13868;A3KFL2;A3KFL5	Exosome complex component RRP4	EXOSC2
27.1799	28.3009	25.638	27.4774	27.0056	27.4327			0.123486	1	-0.265635	-0.337778	0	Q13887	Q13887	Krueppel-like factor 5	KLF5
27.1122	27.6982	25.7229	26.7078	26.0505	25.9581			0.406879	1	0.605604	0.959035	0	Q13895;F8WBL2;H7BY94	Q13895	Bystin	BYSL
28.1443	28.7958	25.5574	28.5602	28.4719	28.7043			0.472001	0.981381	-1.07966	-1.08921	0	Q13907;C9JD53	Q13907	Isopentenyl-diphosphate Delta-isomerase 1	IDI1
26.9914	27.9781	26.4344	27.0112	26.6724	26.8561			0.246713	1	0.288067	0.623726	0	Q14008;H0YDX5;E9PQH5;H0YCF6;H0YEK7	Q14008	Cytoskeleton-associated protein 5	CKAP5
27.8601	28.8163	25.803	27.9086	28.7782	28.2693			0.374506	1	-0.825511	-0.893316	0	Q14011;K7ENX8;K7ELV6;K7EJV5;K7ELT6;K7EJV1;K7EMY9;K7EPM4;K7ER40;K7EQR7;D6W5Y5	Q14011;K7ENX8;K7ELV6;K7EJV5;K7ELT6;K7EJV1;K7EMY9;K7EPM4;K7ER40;K7EQR7;D6W5Y5	Cold-inducible RNA-binding protein	CIRBP
28.6801	29.0298	25.5016	28.418	28.7798	29.0554			0.373576	1	-1.0139	-0.891417	0	Q14019;H3BT58	Q14019;H3BT58	Coactosin-like protein	COTL1
31.3853	31.6026	30.2051	31.562	31.3862	31.1682			0.2753	1	-0.307822	-0.685808	0	Q14103;H0YA96;H0Y8G5;D6RAF8;D6RD83	Q14103;H0YA96;H0Y8G5;D6RAF8	Heterogeneous nuclear ribonucleoprotein D0	HNRNPD
26.5437	27.2159	25.9361	26.3481	26.1762	26.3846			0.281556	1	0.262299	0.699233	0	Q14118;C9J196;C9JQL4;C9JYS1;C9JEN1	Q14118	Dystroglycan;Alpha-dystroglycan;Beta-dystroglycan	DAG1
29.5486	30.1079	28.0716	29.5129	29.6511	29.7762			0.263386	1	-0.404065	-0.660084	0	Q14126;A0A804HJ09;A0A804HLK9;J3KSI6;A0A804HIA2;A0A804HJQ3	Q14126	Desmoglein-2	DSG2
28.2335	28.9724	27.4743	28.443	28.7199	28.7823			0.401366	1	-0.421683	-0.947895	0	Q14137;A0A075B729	Q14137	Ribosome biogenesis protein BOP1	BOP1
27.5951	28.2432	26.3202	27.3333	27.6335	28.0554			0.181998	1	-0.287906	-0.477907	0	Q14139;B7Z7P0	Q14139	Ubiquitin conjugation factor E4 A	UBE4A
25.2549	25.8307	25.0364	25.504	25.8992	25.1774			0.184703	1	-0.152856	-0.484174	0	Q14146	Q14146	Unhealthy ribosome biogenesis protein 2 homolog	URB2
29.5081	29.1288	28.9687	29.5528	29.7062	29.6694			1.24364	0.213683	-0.440941	-2.64863	0	Q14152	Q14152	Eukaryotic translation initiation factor 3 subunit A	EIF3A
28.3548	28.8315	28.4917	28.7085	28.9087	28.989			0.876066	0.40153	-0.309377	-1.88166	0	Q14157;F8W726;Q5VU77;Q5VU79;Q5VU78;Q5VU81;Q5VU80;H0Y5H6;H7C2T8	Q14157;F8W726	Ubiquitin-associated protein 2-like	UBAP2L
25.804	26.9013	25.3214	27.9889	27.901	27.9527			1.84279	0.105152	-1.9386	-4.14125	0	Q14165;F5H1S8;H0YG07;F5GX14	Q14165;F5H1S8;H0YG07	Malectin	MLEC
30.4427	31.0442	27.6092	30.5292	30.5395	30.5884			0.332123	1	-0.853696	-0.805954	0	Q14166;V9GY16	Q14166	Tubulin--tyrosine ligase-like protein 12	TTLL12
27.5007	27.7323	27.9636	27.7867	27.9351	27.978			0.503621	0.950372	-0.167761	-1.15169	0	Q14192;F8WDA8;U3KQT4;C9J3S8	Q14192	Four and a half LIM domains protein 2	FHL2
30.2954	30.7391	29.3786	30.4227	30.5123	30.5801			0.383272	1	-0.367345	-0.91119	0	Q14204;A0A7P0T9C4;A0A7P0TA13;A0A2R8Y5T0;A0A2R8Y706;A0A7P0T9R4;A0A7P0TAW9;A0A7P0T7V5;A0A7P0T916;A0A7P0T8N2;A0A7P0TBJ7;A0A7P0TAF3;A0A7P0TB75;A0A2R8Y6H2;A0A7P0T9K2;A0A7P0T9F1;A0A7P0T8W5;A0A2R8YFZ7;A0A7P0TAM4;A0A7P0T825;A0A7P0TB64;A0A7P0TAV5;A0A7P0T990;A0A804HHY6;A0A7P0T942;A0A2R8YGC7;A0A7P0T9S3;A0A7P0T934;A0A7P0T9Y3;A0A7P0TBC9;A0A7P0TAS7;A0A7P0TB96	Q14204;A0A7P0T9C4;A0A7P0TA13;A0A2R8Y5T0;A0A2R8Y706;A0A7P0T9R4;A0A7P0TAW9;A0A7P0T7V5;A0A7P0T916;A0A7P0T8N2;A0A7P0TBJ7;A0A7P0TAF3;A0A7P0TB75;A0A2R8Y6H2;A0A7P0T9K2;A0A7P0T9F1;A0A7P0T8W5;A0A2R8YFZ7;A0A7P0TAM4;A0A7P0T825;A0A7P0TB64;A0A7P0TAV5;A0A7P0T990;A0A804HHY6;A0A7P0T942;A0A2R8YGC7	Cytoplasmic dynein 1 heavy chain 1	DYNC1H1
27.9094	27.9492	27.4944	27.6638	27.7099	27.6892			0.264341	1	0.096686	0.662152	0	Q14232;F5H0D0;H0YGG4	Q14232;F5H0D0	Translation initiation factor eIF-2B subunit alpha	EIF2B1
29.3139	28.6801	28.925	29.807	30.1029	30.1671			2.09141	0.0531915	-1.05267	-4.89001	0	Q14240;E7EQG2;J3KSN7	Q14240;E7EQG2	Eukaryotic initiation factor 4A-II;Eukaryotic initiation factor 4A-II, N-terminally processed	EIF4A2
27.4209	26.7244	26.4894	27.6644	26.8888	27.9296			0.666246	0.683228	-0.616004	-1.46943	0	Q14244;A0A087WZ40	Q14244;A0A087WZ40	Ensconsin	MAP7
30.2096	30.5107	29.1234	30.3879	30.4692	30.7397			0.602318	0.789437	-0.584403	-1.3449	0	Q14247;H0YCD9;H0YEV2	Q14247	Src substrate cortactin	CTTN
28.3226	28.846	28.1224	28.4718	28.5709	28.6937			0.263229	1	-0.148485	-0.659743	0	Q14257;A8MXP8;H0YL43	Q14257;A8MXP8;H0YL43	Reticulocalbin-2	RCN2
28.7846	29.2942	28.2112	29.1342	29.2493	29.1896			0.609896	0.774501	-0.427715	-1.35967	0	Q14258;A0A3B3IUA7;I3L2W4	Q14258;A0A3B3IUA7	E3 ubiquitin/ISG15 ligase TRIM25	TRIM25
27.6743	28.0874	28.7807	26.9653	25.6054	26.7528			1.51268	0.137567	1.73962	3.27263	0	Q14320;B0S8I6;Q9Y247	Q14320;B0S8I6	Protein FAM50A	FAM50A
28.9957	29.797	27.9295	29.3015	29.1099	29.0348			0.166414	1	-0.241354	-0.441469	0	Q14353;A0A1W2PR36;K7EM34	Q14353;A0A1W2PR36	Guanidinoacetate N-methyltransferase	GAMT
28.4916	28.5655	28.1223	28.6805	28.9269	28.8555			1.29056	0.196098	-0.427821	-2.75293	0	Q14376;Q5QPP4;Q5QPP3;Q5QPP1;Q5QPP9	Q14376;Q5QPP4;Q5QPP3;Q5QPP1	UDP-glucose 4-epimerase	GALE
28.6588	29.4866	28.9209	29.1681	29.2242	29.0548			0.195566	1	-0.126932	-0.509176	0	Q14444;G3V153;E9PLA9	Q14444;G3V153;E9PLA9	Caprin-1	CAPRIN1
29.8693	30.2763	28.7749	29.7867	29.787	29.4398			0.0223502	1	-0.0309951	-0.0669443	0	Q14498;G3XAC6;A0A0U1RQH7;H0Y4X3;A0A0U1RQW2;Q5QP23;G3V5Z6;Q5QP22;H0YJJ3;G3XAP0;Q86U06;F8WF24;F2Z2Z5;A0A087X122;A8MYG5;G3V546	Q14498;G3XAC6;A0A0U1RQH7;H0Y4X3;A0A0U1RQW2	RNA-binding protein 39	RBM39
29.3516	29.6302	28.6152	29.2767	29.3887	29.3607			0.178406	1	-0.143049	-0.46956	0	Q14517;A0A087WVP1;D6RCE4;H0Y9H4;H0Y9C8	Q14517;A0A087WVP1	Protocadherin Fat 1;Protocadherin Fat 1, nuclear form	FAT1
27.8786	27.5009	27.7208	28.001	25.7136	26.0487			0.703246	0.603303	1.11232	1.54155	0	Q14554	Q14554	Protein disulfide-isomerase A5	PDIA5
26.3811	27.6779	25.2614	27.0215	27.4416	27.2612			0.492901	0.964028	-0.801258	-1.13055	0	Q14558;C9JNQ3	Q14558	Phosphoribosyl pyrophosphate synthase-associated protein 1	PRPSAP1
29.0198	29.6485	27.6274	28.6946	29.1974	28.773			0.0697266	1	-0.123079	-0.199403	0	Q14566	Q14566	DNA replication licensing factor MCM6	MCM6
26.6413	27.1708	25.6993	26.4348	26.6206	27.0199			0.151232	1	-0.187955	-0.405386	0	Q14573;A0A3B3IRP0;A0A3B3IU13;A0A3B3IU05;A0A3B3ITQ1;A0A3B3ITU8;A0A3B3IU04;A0A3F2YNW8;Q14643;A0A3B3ITM1;A0A3B3ITQ4;B7ZMI3	Q14573	Inositol 1,4,5-trisphosphate receptor type 3	ITPR3
28.5947	29.5483	27.6113	28.5763	28.4694	28.6999			0.00168268	1	0.00290362	0.00515605	0	Q14651;C9JAM8;C9J359;C9J0F3;C9JAM3;C9JVY2;C9JU08	Q14651	Plastin-1	PLS1
26.7358	26.8785	25.2334	26.9846	26.5202	26.9333			0.41242	1	-0.53008	-0.970206	0	Q14677;H0YD52	Q14677	Clathrin interactor 1	CLINT1
27.2415	27.6633	25.632	27.3654	27.4951	27.6118			0.44505	1	-0.645154	-1.03562	0	Q14683;G8JLG1;A0A6Q8PHC3;V9GY57	Q14683;G8JLG1;A0A6Q8PHC3	Structural maintenance of chromosomes protein 1A;Structural maintenance of chromosomes protein	SMC1A
27.0043	27.8093	26.1838	27.6308	27.9098	28.1524			0.846578	0.418295	-0.898496	-1.82305	0	Q14684	Q14684	Ribosomal RNA processing protein 1 homolog B	RRP1B
26.8844	27.8715	25.9462	26.6636	26.8538	27.1271			0.0110836	1	0.0192184	0.0336054	0	Q14692	Q14692	Ribosome biogenesis protein BMS1 homolog	BMS1
28.2639	28.8034	26.6328	28.1654	28.1782	28.1772			0.157039	1	-0.273551	-0.419259	0	Q14694;J3KT19;H3BQP1;H3BQC6;H3BNS8;H3BNA1	Q14694	Ubiquitin carboxyl-terminal hydrolase 10	USP10
28.0251	27.9343	27.3415	28.7164	28.4686	28.3546			1.44788	0.142496	-0.746264	-3.11626	0	Q14696;H0YLI4	Q14696	LDLR chaperone MESD	MESDC2
30.9079	30.8887	30.2944	31.0136	30.9795	30.8499			0.532342	0.9179	-0.250652	-1.20814	0	Q14697;F5H6X6	Q14697;F5H6X6	Neutral alpha-glucosidase AB	GANAB
27.4091	28.0142	26.5714	26.9973	26.8465	26.8083			0.45718	0.997168	0.447506	1.05978	0	Q14746;B7Z2Y2;V9GY21	Q14746;B7Z2Y2	Conserved oligomeric Golgi complex subunit 2	COG2
29.2414	29.5855	28.643	29.6121	29.7902	29.6623			0.883107	0.396051	-0.531612	-1.8957	0	Q14764;H3BQK6;H3BRL2;H3BUK7;H3BNF6;H3BP76;H3BPZ2;H3BNF2;H3BUP3;H3BQE7;I3L155	Q14764	Major vault protein	MVP
27.491	28.2091	26.9672	27.8487	27.9237	27.0213			0.0307369	1	-0.0421359	-0.0912618	0	Q14789;E7EU81;H0Y867;F8WF12;C9J8Q0;H7C5I7	Q14789;E7EU81	Golgin subfamily B member 1	GOLGB1
29.8653	29.8795	27.6944	30.2985	30.7496	30.9667			0.948813	0.358436	-1.5252	-2.02768	0	Q14847;C9J9W2;F6S2S5;K7ESD6;J3KSN1	Q14847;C9J9W2	LIM and SH3 domain protein 1	LASP1
30.667	31.1622	28.2818	30.5522	30.6831	30.6338			0.262671	1	-0.58608	-0.658534	0	Q14974;J3KTM9;J3QR48;J3QKQ5;J3QRG4;J3KS06	Q14974;J3KTM9	Importin subunit beta-1	KPNB1
28.9306	29.3193	28.0916	29.1988	29.0459	29.0056			0.341529	1	-0.302951	-0.825488	0	Q14980;A0A087WY61;F5H4J1;H0YFY6;F5H6Y5;K4DIE0;F5H763;F5H0Z7;F5H3L6;F5H2F3;F5GZW1;F5H1L0;F8W6T3;F5H068;F5H073;F5GWK2;F5H4Y4;F5GWA2;F5H7R5	Q14980;A0A087WY61	Nuclear mitotic apparatus protein 1	NUMA1
27.0123	28.2155	25.8808	26.8386	27.3499	27.1387			0.0357276	1	-0.0728474	-0.105542	0	Q14C86;F8W9S7;C9IZ08;B4DGD8;H0Y7I9;B0QZ65;H0Y4E7;A0A0A0MQV8;C9IZX9	Q14C86;F8W9S7;C9IZ08	GTPase-activating protein and VPS9 domain-containing protein 1	GAPVD1
26.9282	27.1845	25.9251	26.672	25.928	26.3266			0.349138	1	0.370392	0.841228	0	Q14CX7	Q14CX7	N-alpha-acetyltransferase 25, NatB auxiliary subunit	NAA25
26.5277	26.813	26.5952	25.6281	27.1999	27.1385			0.00643426	1	-0.0102202	-0.0196099	0	Q15006;H0YAS9	Q15006	ER membrane protein complex subunit 2	EMC2
29.5382	29.312	28.7405	29.7466	29.4976	29.5939			0.771632	0.503842	-0.415759	-1.67529	0	Q15008;C9J7B7;H7C531	Q15008	26S proteasome non-ATPase regulatory subunit 6	PSMD6
26.2186	25.8369	25.6864	26.3234	26.3552	26.3644			1.28029	0.200265	-0.433728	-2.72996	0	Q15018	Q15018	BRISC complex subunit Abro1	FAM175B
30.725	30.9223	29.4726	31.019	30.6987	30.7687			0.417856	1	-0.455479	-0.981147	0	Q15019;B5MCX3;C9J2Q4;H7C2Y0;C9JB25;H7C310;C9J938;C9IY94;C9IZU3;C9JQJ4;C9JZI2;B5MD47;F8WB65;C9JFT1;A0A1B0GXJ2;C9JT15;C9JSE7;H7C1T1	Q15019;B5MCX3;C9J2Q4	Septin-2	45902
27.3687	28.1293	26.0583	27.5077	27.1425	27.4504			0.106359	1	-0.181432	-0.294845	0	Q15021;E7EN77;F5GZK7;F5H431	Q15021;E7EN77	Condensin complex subunit 1	NCAPD2
27.9357	28.4086	26.3144	27.8866	28.0081	28.2037			0.304917	1	-0.479899	-0.748917	0	Q15024	Q15024	Exosome complex component RRP42	EXOSC7
29.9265	29.673	29.2512	29.8394	29.5912	29.921			0.308801	1	-0.166941	-0.757111	0	Q15029;K7EP67;K7EJ74;K7EIT3;K7EIV5	Q15029	116 kDa U5 small nuclear ribonucleoprotein component	EFTUD2
26.6828	27.197	26.4862	26.6721	26.7163	26.2943			0.382005	1	0.227778	0.90861	0	Q15031;E9PHM2;A0A499FJL2;A0A494C1E0;C9JYR8	Q15031;E9PHM2;A0A499FJL2;A0A494C1E0	Probable leucine--tRNA ligase, mitochondrial	LARS2
28.021	28.1047	25.689	27.688	27.8274	28.1299			0.310401	1	-0.610155	-0.760481	0	Q15042	Q15042	Rab3 GTPase-activating protein catalytic subunit	RAB3GAP1
29.2231	29.9151	28.9576	29.5944	29.5414	29.6817			0.345784	1	-0.240541	-0.834297	0	Q15046;H3BVA8;H3BRC9;J3KRL2;H3BPV7	Q15046	Lysine--tRNA ligase	KARS
25.3074	28.3472	26.0598	27.8185	27.803	27.4259			0.530076	0.917765	-1.11103	-1.2037	0	Q15050	Q15050	Ribosome biogenesis regulatory protein homolog	RRS1
29.768	30.6775	29.8104	29.8981	30.0579	29.9246			0.155799	1	0.12508	0.416303	0	Q15056;A0A7I2V385;A0A7I2V4E4;A0A7I2V3D5;A0A7I2V3E4;A0A7I2V4V9	Q15056;A0A7I2V385;A0A7I2V4E4	Eukaryotic translation initiation factor 4H	EIF4H
27.6047	27.3139	25.5037	27.0102	26.9318	27.1948			0.132439	1	-0.238164	-0.359843	0	Q15061;C9IZK7;C9JEE7	Q15061;C9IZK7	WD repeat-containing protein 43	WDR43
26.9594	27.649	25.1986	26.9853	26.9176	27.2537			0.240784	1	-0.449914	-0.610689	0	Q15067;K7ELT1;I3L0T4;I3L2U4;K7ENF1;K7ESC7	Q15067	Peroxisomal acyl-coenzyme A oxidase 1	ACOX1
27.1757	27.9045	25.3383	27.6316	27.7321	27.3207			0.41553	1	-0.755274	-0.976468	0	Q15075	Q15075	Early endosome antigen 1	EEA1
32.029	32.1797	30.8622	31.83	32.1777	31.9648			0.282597	1	-0.300562	-0.701464	0	Q15084	Q15084	Protein disulfide-isomerase A6	PDIA6
29.2387	29.6133	27.6988	29.2747	29.1336	29.4264			0.292724	1	-0.427973	-0.723072	0	Q15102;M0R389;M0R1K3;M0QZT2;M0QXS6;M0R323	Q15102;M0R389;M0R1K3	Platelet-activating factor acetylhydrolase IB subunit gamma	PAFAH1B3
26.7689	26.9415	23.8925	27.2349	26.9713	26.7752			0.49197	0.964786	-1.12617	-1.12871	0	Q15121;B1AKZ5	Q15121	Astrocytic phosphoprotein PEA-15	PEA15
30.5201	30.7991	29.706	30.5785	30.7434	30.7087			0.432406	1	-0.335145	-1.01034	0	Q15149;H0YDN1;E9PMV1;E9PKG0;E9PIA2;E9PQ28	Q15149;H0YDN1	Plectin	PLEC
26.7169	26.8655	26.5595	26.7728	26.9516	26.7296			0.394287	1	-0.104049	-0.933564	0	Q15154;A0A5H1ZRS1;A0A4W8VX11;H0YBA1;E9PGW9;E7EV93;E5RGQ4	Q15154;A0A5H1ZRS1;A0A4W8VX11;H0YBA1	Pericentriolar material 1 protein	PCM1
31.2658	31.7694	30.4646	31.4549	31.5447	31.2156			0.239417	1	-0.238451	-0.607676	0	Q15181;Q5SQT6	Q15181;Q5SQT6	Inorganic pyrophosphatase	PPA1
31.8558	32.3157	30.6987	32.1367	31.9458	31.8544			0.29522	1	-0.355579	-0.728378	0	Q15185;A0A087WYT3;B4DDC6	Q15185;A0A087WYT3;B4DDC6	Prostaglandin E synthase 3	PTGES3
26.9342	27.2621	24.4191	26.4401	26.732	27.0412			0.227986	1	-0.532635	-0.582345	0	Q15208	Q15208	Serine/threonine-protein kinase 38	STK38
30.4143	30.4963	29.5451	30.6198	30.7303	30.724			0.815015	0.455263	-0.53949	-1.76063	0	Q15293;E9PP27	Q15293	Reticulocalbin-1	RCN1
28.8599	29.9197	25.5059	29.569	29.8372	29.455			0.498917	0.958659	-1.52523	-1.14242	0	Q15334;A0A087WW77	Q15334;A0A087WW77	Lethal(2) giant larvae protein homolog 1	LLGL1
32.1535	32.5271	31.5337	32.2336	32.5674	32.3693			0.448807	1	-0.318651	-1.04311	0	Q15365	Q15365	Poly(rC)-binding protein 1	PCBP1
32.2041	32.3272	31.3649	32.2456	32.0116	32.3124			0.286893	1	-0.224412	-0.710646	0	Q15366;F8VXH9;F8W0G4;F8W1G6;H3BSS4;H3BND9;J3QT27;F8VTZ0;H3BSP4	Q15366;F8VXH9;F8W0G4	Poly(rC)-binding protein 2	PCBP2
29.9429	29.7862	25.008	29.9655	29.8497	29.7758			0.426477	1	-1.61796	-0.998462	0	Q15370;B8ZZU8;I3L0M9;A0A0B4J296	Q15370;B8ZZU8;I3L0M9;A0A0B4J296	Transcription elongation factor B polypeptide 2	TCEB2
27.1457	27.6049	24.4411	26.5526	26.4265	26.5745			0.0415719	1	-0.120637	-0.12209	0	Q15386	Q15386	Ubiquitin-protein ligase E3C	UBE3C
26.0356	25.5417	26.5189	26.2445	27.7213	27.9504			0.987685	0.327741	-1.27332	-2.10667	0	Q15392;A0A0A0MTI1;A0A3B3IT58;A0A3B3IRV7;A0A3B3ISR5;A0A3B3ITT9	Q15392;A0A0A0MTI1	Delta(24)-sterol reductase	DHCR24
29.5313	29.8094	28.3849	29.7842	29.4668	29.662			0.372018	1	-0.395824	-0.888234	0	Q15393;J3QL37;I3L4G7;H3BMB0;J3QRB2;J3QKV4	Q15393	Splicing factor 3B subunit 3	SF3B3
28.494	27.9052	27.7482	27.8962	27.7333	27.6312			0.544985	0.899549	0.295596	1.23292	0	Q15404	Q15404	Ras suppressor protein 1	RSU1
27.8748	28.2493	27.7114	27.9923	28.7273	28.4877			0.785067	0.490832	-0.457232	-1.70167	0	Q15417;E9PDU6	Q15417;E9PDU6	Calponin-3;Calponin	CNN3
29.0167	29.424	28.5976	29.4088	29.3387	29.3841			0.693112	0.625188	-0.364421	-1.52178	0	Q15424;K7ES42;K7EII0	Q15424	Scaffold attachment factor B1	SAFB
28.6025	28.5996	25.5865	28.8021	28.416	28.5267			0.414461	1	-0.985402	-0.974317	0	Q15428;K7EMT0	Q15428;K7EMT0	Splicing factor 3A subunit 2	SF3A2
28.5566	29.5917	27.7462	28.2216	28.8102	28.6455			0.0439463	1	0.0723794	0.128761	0	Q15435;H7C003;C9JD73;C9J177;B5MBZ8;H7C118;C9JRC4;H7C3Q5	Q15435;H7C003;C9JD73;C9J177;B5MBZ8	Protein phosphatase 1 regulatory subunit 7	PPP1R7
29.2675	30.043	28.0632	29.1496	29.3875	29.4775			0.13484	1	-0.213653	-0.36572	0	Q15459;F8WB66;H7C1L2;F8WC79	Q15459	Splicing factor 3A subunit 1	SF3A1
27.377	27.7937	26.4656	27.1351	27.4953	27.8627			0.25503	1	-0.285564	-0.641917	0	Q15477;H7C5N0;F8WDE8;H7C4L3;B4E0B4	Q15477	Helicase SKI2W	SKIV2L
27.6233	28.2361	26.7584	27.6029	27.4474	27.9772			0.108043	1	-0.136563	-0.29911	0	Q15555;K7EL66;K7ERD8	Q15555	Microtubule-associated protein RP/EB family member 2	MAPRE2
30.7736	31.0585	29.0697	30.9134	30.9132	30.7297			0.369906	1	-0.551516	-0.883912	0	Q15631;E9PGT1;H7C1D4;A0A0J9YVW2;A0A0J9YX41	Q15631;E9PGT1;H7C1D4	Translin	TSN
27.4518	27.9012	27.328	27.3381	27.2581	27.2505			0.721227	0.572809	0.278098	1.57664	0	Q15654;H7BZE2	Q15654	Thyroid receptor-interacting protein 6	TRIP6
29.0734	29.0734	27.7442	29.2402	29.4582	29.4928			0.786018	0.493643	-0.766723	-1.70354	0	Q15691	Q15691	Microtubule-associated protein RP/EB family member 1	MAPRE1
29.8898	30.1588	28.9676	30.1801	29.9625	29.9991			0.438484	1	-0.375188	-1.0225	0	Q15717;M0QZR9;M0R055;A0A494C0Q5;A0A494C0M6;A0A494C011	Q15717;M0QZR9	ELAV-like protein 1	ELAVL1
26.7317	25.755	25.9724	27.2285	26.5705	26.8142			0.952306	0.358157	-0.718069	-2.03475	0	Q15738;C9JDR0	Q15738;C9JDR0	Sterol-4-alpha-carboxylate 3-dehydrogenase, decarboxylating	NSDHL
28.4556	28.9198	27.772	29.0779	29.1135	29.0278			0.967691	0.339046	-0.690596	-2.06595	0	Q15785	Q15785	Mitochondrial import receptor subunit TOM34	TOMM34
28.398	28.9915	28.1499	29.0173	28.587	28.5094			0.257792	1	-0.191426	-0.647934	0	Q15833;M0R0M7;M0R1A1;M0R118;M0QZ54;R4GMY7;M0R0D4;A0A087WUN8;M0R376	Q15833;M0R0M7	Syntaxin-binding protein 2	STXBP2
29.7643	30.201	30.6163	29.8543	26.0642	30.8961			0.350249	1	1.25568	0.843521	0	Q15847;Q5TBU2	Q15847	Adipogenesis regulatory factor	ADIRF
30.0321	30.4489	29.6852	30.6367	30.5401	30.6494			1.16434	0.243505	-0.553318	-2.47612	0	Q15907;M0R2D0	Q15907	Ras-related protein Rab-11B	RAB11B
29.5593	29.6312	28.7947	29.5098	29.7067	29.5207			0.383245	1	-0.250711	-0.911135	0	Q15942;H0Y2Y8;H7C3D3;C9JJK5;H7C3R3;C9IZ41	Q15942;H0Y2Y8	Zyxin	ZYX
28.2624	28.894	24.424	28.227	28.5429	28.4804			0.364956	1	-1.2233	-0.873773	0	Q16186;A0A087WX59;A0A087WUX6	Q16186	Proteasomal ubiquitin receptor ADRM1	ADRM1
27.2737	28.0796	26.6819	27.3839	27.8187	27.3391			0.144777	1	-0.168793	-0.389856	0	Q16204	Q16204	Coiled-coil domain-containing protein 6	CCDC6
28.5146	29.4152	27.9159	28.585	28.493	28.6953			0.0182332	1	0.0241165	0.0548536	0	Q16401;F2Z3J2;Q4VXH0	Q16401	26S proteasome non-ATPase regulatory subunit 5	PSMD5
26.7861	27.3416	26.0817	26.7826	26.8599	27.0829			0.173541	1	-0.172056	-0.458205	0	Q16513;B1AL79;H0Y5V5	Q16513	Serine/threonine-protein kinase N2	PKN2
29.5278	30.179	28.5956	29.3418	29.2019	29.498			0.0647227	1	0.0869052	0.185936	0	Q16531;A0A7P0TAK7;A0A7P0T965;A0A7P0Z3Z5;F5GY55;A0A7P0Z4B9;A0A7P0T870;A0A7P0TB30;F5GWI0;F5H2L3;A0A7P0Z4L2;F5GZY8;F5H198;A0A7P0TAX4	Q16531;A0A7P0TAK7;A0A7P0T965;A0A7P0Z3Z5;F5GY55;A0A7P0Z4B9;A0A7P0T870;A0A7P0TB30	DNA damage-binding protein 1	DDB1
26.3107	27.108	25.8928	26.3144	26.8419	26.5387			0.120227	1	-0.127867	-0.329685	0	Q16537	Q16537	Serine/threonine-protein phosphatase 2A 56 kDa regulatory subunit epsilon isoform	PPP2R5E
26.9875	27.1369	24.6594	27.2766	27.2202	27.3826			0.571202	0.849754	-1.03185	-1.28419	0	Q16539;B4E0K5;B5TY33;E7EX54;H7C4E2	Q16539;B4E0K5;B5TY33	Mitogen-activated protein kinase 14	MAPK14
30.5016	30.638	30.039	31.0383	31.0221	31.0157			1.59894	0.130667	-0.632516	-3.48748	0	Q16543;K7EQA9;K7EKQ2;K7EL68;K7EIU0	Q16543;K7EQA9;K7EKQ2	Hsp90 co-chaperone Cdc37;Hsp90 co-chaperone Cdc37, N-terminally processed	CDC37
29.406	29.8776	28.3888	29.336	29.67	29.6392			0.290043	1	-0.324264	-0.717366	0	Q16576;E9PC52;Q5JP02;Q5JP01;Q5JNZ6;C9J7L0	Q16576;E9PC52;Q5JP02	Histone-binding protein RBBP7	RBBP7
28.6811	28.9925	27.6362	28.8013	28.7491	28.9622			0.410196	1	-0.400936	-0.965724	0	Q16643;D6R9W4;D6RFI1;D6R9Q9;D6RCR4	Q16643;D6R9W4	Drebrin	DBN1
27.2575	27.274	25.6996	27.0961	26.7969	26.9235			0.13607	1	-0.195128	-0.368722	0	Q16658;C9JPH9;C9JFC0;A0A0A0MSB2	Q16658	Fascin	FSCN1
28.9385	29.3823	28.0851	28.7306	29.2476	29.1804			0.23881	1	-0.25091	-0.606336	0	Q16698;E5RJG7;E5RFV2;E5RJD2;E5RID6;H0YAW3	Q16698;E5RJG7;E5RFV2;E5RJD2	2,4-dienoyl-CoA reductase, mitochondrial	DECR1
30.5348	31.0245	29.1169	30.5817	30.9909	30.9321			0.447206	1	-0.609486	-1.03992	0	Q16762;B1AH48	Q16762	Thiosulfate sulfurtransferase	TST
28.1033	27.7615	27.4885	28.0184	27.6301	27.3964			0.150897	1	0.102789	0.404583	0	Q16795;A0A3B3ISG8;F5H0J3;F5GY40	Q16795;A0A3B3ISG8	NADH dehydrogenase [ubiquinone] 1 alpha subcomplex subunit 9, mitochondrial	NDUFA9
31.1081	31.4952	30.5076	30.7435	30.8105	30.8284			0.349386	1	0.242825	0.841739	0	Q16822;H0YML5;H0YM31;H0YMA5;H0YNG4;P35558;H0YMU6;H0YMY3	Q16822;H0YML5;H0YM31	Phosphoenolpyruvate carboxykinase [GTP], mitochondrial	PCK2
27.0738	28.3246	27.7961	29.2013	28.9692	29.4811			1.71675	0.126737	-1.48571	-3.7943	0	Q16890;E9PNK6;E9PPQ1;J3KNE7;E9PNQ9	Q16890;E9PNK6;E9PPQ1;J3KNE7	Tumor protein D53	TPD52L1
29.8444	29.9894	28.8109	29.7413	29.683	29.6762			0.152617	1	-0.151876	-0.408703	0	Q16891;B9A067;C9J406;H7C463;A0A087WYS0;D6RAW4	Q16891;B9A067;C9J406;H7C463	MICOS complex subunit MIC60	IMMT
30.359	30.6244	29.3185	30.3955	30.727	30.8061			0.578049	0.835631	-0.542238	-1.29756	0	Q1KMD3;H3BQZ7	Q1KMD3;H3BQZ7	Heterogeneous nuclear ribonucleoprotein U-like protein 2	HNRNPUL2;HNRNPUL2-BSCL2
26.9601	27.4663	25.6582	26.7847	26.3196	26.7519			0.0466113	1	0.0761445	0.136214	0	Q29RF7;H0Y9L9;H0Y9X6;H0Y9L6	Q29RF7	Sister chromatid cohesion protein PDS5 homolog A	PDS5A
26.8264	27.8616	24.3864	26.885	26.8326	26.5713			0.145345	1	-0.404812	-0.391227	0	Q2NL82;I3L1Q5	Q2NL82;I3L1Q5	Pre-rRNA-processing protein TSR1 homolog	TSR1
25.0162	28.121	25.7727	28.2427	28.7216	28.0299			0.994014	0.323829	-2.0281	-2.1196	0	Q2TAL8	Q2TAL8	Glutamine-rich protein 1	QRICH1
29.2582	29.4761	27.0312	28.4518	28.3554	28.6121			0.0505087	1	0.115401	0.147048	0	Q2TAY7	Q2TAY7	WD40 repeat-containing protein SMU1;WD40 repeat-containing protein SMU1, N-terminally processed	SMU1
28.2362	28.2303	27.8761	28.6834	28.7594	29.0125			1.97851	0.078963	-0.704251	-4.53874	0	Q32MZ4;C9JTC6	Q32MZ4	Leucine-rich repeat flightless-interacting protein 1	LRRFIP1
32.5788	32.4468	31.842	32.8877	32.8189	32.8191			1.1401	0.248873	-0.55268	-2.42429	0	Q32Q12;J3KPD9;P22392;E7ERL0;O60361;E5RHP0;F6XY72;C9K028	Q32Q12;J3KPD9;P22392;E7ERL0	Nucleoside diphosphate kinase;Nucleoside diphosphate kinase B	NME1-NME2;NME2;NME1
29.1613	29.9354	27.8721	29.0712	29.1827	29.0537			0.0652053	1	-0.112926	-0.187239	0	Q3LXA3;H0YCY6;E9PJG8;I3L252;E9PQR1	Q3LXA3;H0YCY6	Bifunctional ATP-dependent dihydroxyacetone kinase/FAD-AMP lyase (cyclizing);ATP-dependent dihydroxyacetone kinase;FAD-AMP lyase (cyclizing)	DAK;TKFC
27.3025	27.1293	26.9593	27.2161	26.4912	26.7415			0.599319	0.794941	0.314076	1.33905	0	Q3YEC7;F2Z2T0;G3V154;H0Y7H6	Q3YEC7;F2Z2T0;G3V154;H0Y7H6	Rab-like protein 6	RABL6
31.5434	32.4925	29.3938	31.7375	31.8992	31.9717			0.324477	1	-0.726213	-0.790007	0	Q3ZCM7;A0A075B736;Q5SQY0	Q3ZCM7;A0A075B736;Q5SQY0	Tubulin beta-8 chain	TUBB8
26.7619	27.0852	26.1897	27.125	26.6607	26.759			0.222081	1	-0.169326	-0.569169	0	Q3ZCW2;F8WF17;B9A055;U3KQ88	Q3ZCW2	Galectin-related protein	LGALSL
25.4757	26.9709	25.0591	28.2444	28.3655	28.5252			1.91145	0.0838689	-2.54314	-4.33909	0	Q4G0N4;A0A0C4DGV3;B7Z8V7;D6RHI4	Q4G0N4;A0A0C4DGV3;B7Z8V7	NAD kinase 2, mitochondrial	NADK2
28.0011	28.109	25.0448	27.5148	27.1704	27.0243			0.0633487	1	-0.184836	-0.182218	0	Q4G176;A0A3B3ISK9;H0YGC7;F5H362;F5H755;F5H5A1;F5H2G6;F5H3B2;H0YH37;F5GX20	Q4G176;A0A3B3ISK9;H0YGC7;F5H362;F5H755;F5H5A1;F5H2G6;F5H3B2	Acyl-CoA synthetase family member 3, mitochondrial	ACSF3
28.1736	27.6792	27.8143	28.2842	28.5151	28.7125			1.47981	0.142336	-0.614885	-3.1928	0	Q52LJ0;H0YNA1	Q52LJ0	Protein FAM98B	FAM98B
29.3143	29.9356	28.1704	29.3721	29.1868	29.1705			0.0691108	1	-0.103031	-0.197751	0	Q53EL6;Q5VZS7	Q53EL6	Programmed cell death protein 4	PDCD4
27.8476	28.3285	27.5805	27.8866	27.5161	27.9009			0.234961	1	0.150968	0.597829	0	Q53GQ0;A0A1B0GV93;A0A1B0GVY6;E9PI21;A0A1B0GW85;A0A1B0GU83	Q53GQ0;A0A1B0GV93;A0A1B0GVY6	Very-long-chain 3-oxoacyl-CoA reductase	HSD17B12
28.1925	28.4265	27.9442	28.7084	28.6031	29.2009			1.31742	0.188453	-0.649691	-2.81343	0	Q53H82	Q53H82	Beta-lactamase-like protein 2	LACTB2
26.7279	25.9445	26.5689	27.2986	27.268	27.0997			1.5129	0.138723	-0.808343	-3.27316	0	Q53T59;B5MC96;F6TR53;A0A494C0K6;A0A0D9SFN1	Q53T59;B5MC96;F6TR53	HCLS1-binding protein 3	HS1BP3
28.623	28.9967	27.7572	29.154	29.2962	29.2363			0.976505	0.331912	-0.769792	-2.08388	0	Q5BKZ1;A0A0A0MRN4;E2QRN4	Q5BKZ1;A0A0A0MRN4	DBIRD complex subunit ZNF326	ZNF326
26.7919	27.0198	26.2729	26.8507	26.416	27.11			0.118302	1	-0.0973746	-0.324885	0	Q5GLZ8;H0Y6K7;D6RCL5	Q5GLZ8	Probable E3 ubiquitin-protein ligase HERC4	HERC4
25.8879	26.1846	25.8973	26.3276	26.6172	25.7412			0.361513	1	-0.238749	-0.866709	0	Q5JRA6;A0A0A0MRH6	Q5JRA6;A0A0A0MRH6	Melanoma inhibitory activity protein 3	MIA3
25.9617	26.1036	25.3691	26.5231	26.2221	26.6814			1.19049	0.24546	-0.664039	-2.5325	0	Q5JSH3;H7BY83	Q5JSH3;H7BY83	WD repeat-containing protein 44	WDR44
26.563	27.3471	24.657	26.6453	26.3478	26.3801			0.121981	1	-0.268672	-0.334044	0	Q5JTH9;A0A087X1U8	Q5JTH9	RRP12-like protein	RRP12
26.3894	27.1066	25.9411	26.309	26.7932	26.5051			0.0531953	1	-0.0567525	-0.154473	0	Q5JUW8;Q92796	Q5JUW8;Q92796	Disks large homolog 3	DLG3
27.5546	28.1778	27.5216	27.2464	27.4385	28.0386			0.214603	1	0.176825	0.552388	0	Q5JVF3	Q5JVF3	PCI domain-containing protein 2	PCID2
29.4042	29.9491	28.5459	29.6196	29.5403	29.2686			0.156543	1	-0.176437	-0.418078	0	Q5LJA5;Q5LJA9;Q9Y5K5;Q5LJB0;H0Y6Y4;H0Y4E0;H0Y636;H0Y4K0	Q5LJA5;Q5LJA9;Q9Y5K5;Q5LJB0;H0Y6Y4;H0Y4E0	Ubiquitin carboxyl-terminal hydrolase;Ubiquitin carboxyl-terminal hydrolase isozyme L5	UCHL5
27.6407	28.3247	28.935	28.2496	25.244	25.5397			0.88753	0.393486	1.95566	1.90453	0	Q5MNZ6;I3L1D0;I3L4S6	Q5MNZ6;I3L1D0;I3L4S6	WD repeat domain phosphoinositide-interacting protein 3	WDR45B
26.3013	27.9529	25.1987	26.581	26.5279	27.0744			0.107331	1	-0.2435	-0.297309	0	Q5QJE6;J3KP30;E9PRB3	Q5QJE6;J3KP30	Deoxynucleotidyltransferase terminal-interacting protein 2	DNTTIP2
28.9888	28.5072	28.2886	28.6893	29.088	28.9538			0.593279	0.805649	-0.315465	-1.32728	0	Q5QPL9;Q9UKM9;Q5QPM1;Q5QPM0;Q5QPM2	Q5QPL9;Q9UKM9;Q5QPM1;Q5QPM0	RNA-binding protein Raly	RALY
28.4438	29.2531	27.0364	28.7809	29.093	28.8112			0.42375	1	-0.65061	-0.992991	0	Q5QPM7;Q92530;H0Y555;F5H4Z3;Q5QPM9	Q5QPM7;Q92530;H0Y555;F5H4Z3	Proteasome inhibitor PI31 subunit	PSMF1
26.3854	25.9593	27.0717	26.3582	26.9652	26.403			0.0978092	1	-0.1033	-0.273032	0	Q9UQ88;Q5QPR3;Q5QPR4	Q9UQ88;Q5QPR3;Q5QPR4	Cyclin-dependent kinase 11A	CDK11A
28.1257	27.9963	24.2013	28.6484	28.5375	28.1386			0.572109	0.849609	-1.66707	-1.28596	0	Q5RI15	Q5RI15	Cytochrome c oxidase protein 20 homolog	COX20
26.4066	27.0507	24.5642	26.8972	26.476	26.7923			0.400266	1	-0.714689	-0.945671	0	Q5SRE5;H7C4K7	Q5SRE5	Nucleoporin NUP188 homolog	NUP188
27.6385	28.2266	25.3915	27.3902	27.7746	27.8744			0.271684	1	-0.594206	-0.678022	0	Q5SSJ5;B0QZK4;B0QZK9;B0QZK8;Q5SWC8	Q5SSJ5;B0QZK4	Heterochromatin protein 1-binding protein 3	HP1BP3
27.9908	27.8519	27.0421	28.6207	28.3359	28.0848			1.01032	0.316503	-0.718864	-2.15301	0	Q5STZ8;Q8NE71;H0YGW7;A0A0G2JIC2;A0A0G2JJB9;F5GYK6	Q5STZ8;Q8NE71;H0YGW7	ATP-binding cassette sub-family F member 1	ABCF1
27.4281	27.5392	27.5487	26.6065	27.5669	26.8605			0.786344	0.493931	0.494029	1.70418	0	Q5SY16	Q5SY16	Polynucleotide 5-hydroxyl-kinase NOL9	NOL9
27.9977	27.8724	27.6967	28.1348	28.4118	28.3267			1.65747	0.130115	-0.435478	-3.63791	0	Q5T0N5;A0A075B6Q2	Q5T0N5;A0A075B6Q2	Formin-binding protein 1-like	FNBP1L
30.8416	31.3156	30.1392	31.0241	30.8014	31.3839			0.328131	1	-0.304327	-0.797634	0	Q5T123;Q9H299	Q5T123;Q9H299	SH3 domain-binding glutamic acid-rich-like protein 3	SH3BGRL3
28.2369	28.5467	26.7421	28.4555	28.5438	28.4449			0.500749	0.957764	-0.639488	-1.14603	0	Q5T4S7;A0A0A0MSW0;X6R960;X6RE05;Q5TBN9	Q5T4S7	E3 ubiquitin-protein ligase UBR4	UBR4
26.971	26.2517	24.6391	27.1122	27.4499	26.1078			0.513978	0.940555	-0.936018	-1.17208	0	Q5T6F2;A0A804HLJ4;Q5JV08;A0A804HJY7;A0A804HLD2;A2A305;A0A804HIV8;A0A804HIK1	Q5T6F2	Ubiquitin-associated protein 2	UBAP2
27.8604	28.0242	27.58	27.5402	27.2399	27.8412			0.577923	0.834759	0.28109	1.29731	0	Q5T6V5;Q5T6V7;Q5T6V6	Q5T6V5;Q5T6V7	UPF0553 protein C9orf64	C9orf64
25.2468	26.1559	24.3664	26.8563	26.3773	26.9074			1.25849	0.207412	-1.45729	-2.68144	0	Q5T8P6;A0A087X0H9;E2PSN0	Q5T8P6;A0A087X0H9	RNA-binding protein 26	RBM26
27.4352	28.1606	24.0049	26.8339	27.1474	26.3773			0.0677876	1	-0.252638	-0.194198	0	Q5TA45;C9IYS7;A0A087WYI0;J3QRY6;C9J979;Q96HV7;E9PMA2;H0YE15;E9PJG0;E9PKA4;E9PNS4;A0A087WXT8	Q5TA45;C9IYS7;A0A087WYI0;J3QRY6;C9J979;Q96HV7	Integrator complex subunit 11	CPSF3L
27.8653	28.1456	26.8152	27.3998	27.619	27.8811			0.01912	1	-0.0246048	-0.0574667	0	Q5TDH0;H0YII4;H0YI90	Q5TDH0	Protein DDI1 homolog 2	DDI2
27.3337	28.2207	27.9116	27.1912	27.5117	27.5098			0.675388	0.666547	0.417783	1.48724	0	Q5TFE4;Q5QPD0;H0YDA5	Q5TFE4	5-nucleotidase domain-containing protein 1	NT5DC1
26.2015	25.8498	25.9585	26.5322	26.9815	26.7653			1.98235	0.0804528	-0.756446	-4.55035	0	Q5VT52	Q5VT52	Regulation of nuclear pre-mRNA domain-containing protein 2	RPRD2
26.8737	27.3422	26.1216	26.8147	26.7383	26.8005			0.00485979	1	-0.00528653	-0.0148376	0	Q5VTR2;C9J0A5;C9JXC9	Q5VTR2	E3 ubiquitin-protein ligase BRE1A	RNF20
28.6146	28.7935	27.4845	29.0168	28.901	29.0846			0.785119	0.49188	-0.703274	-1.70177	0	Q5VV41;B0QZD3;B0QZD4	Q5VV41	Rho guanine nucleotide exchange factor 16	ARHGEF16
26.7712	26.0537	25.4116	26.6561	26.6239	26.3936			0.525074	0.925501	-0.479081	-1.19388	0	Q5VWZ2	Q5VWZ2	Lysophospholipase-like protein 1	LYPLAL1
27.7445	28.381	26.0759	27.6688	27.7087	27.7893			0.177567	1	-0.321808	-0.467606	0	Q5VZ89;X6RAE7;X6R5W5;R4GMN2;A0A0A0MRX3	Q5VZ89	DENN domain-containing protein 4C	DENND4C
25.8406	26.1929	25.4382	25.8097	25.4549	25.9558			0.115281	1	0.0837504	0.317333	0	Q5VZK9;A0A0U1RQQ1;A0A0U1RR91	Q5VZK9;A0A0U1RQQ1	Leucine-rich repeat-containing protein 16A	LRRC16A
25.4407	26.6549	25.518	25.3114	26.0076	26.8307			0.109781	1	-0.178742	-0.303501	0	Q66K74;M0QXQ9;M0QY41;M0QZ50;M0R1M7;M0R1J2	Q66K74	Microtubule-associated protein 1S;MAP1S heavy chain;MAP1S light chain	MAP1S
28.0424	28.9827	27.506	28.1309	27.997	28.1512			0.0674942	1	0.0839958	0.193409	0	Q68CZ2;E9PCX8;C9JHU5;C9JWN9;C9JTD0;H0Y4U1;F8VV64;E9PGF5;A0A087WWW7;E9PF55;A0A494C067;A0A804HI61;A0A2R8Y4T1;Q63HR2;Q9HBL0	Q68CZ2;E9PCX8	Tensin-3	TNS3
27.2393	27.2596	26.9273	27.3588	27.2049	27.4002			0.66087	0.694061	-0.179269	-1.45896	0	Q68E01;A0A096LNW8;H0Y8Z1	Q68E01	Integrator complex subunit 3	INTS3
25.7427	27.9204	25.1023	27.4321	27.6153	27.2797			0.62188	0.764475	-1.1872	-1.38302	0	Q68EM7;I3L3P1;I3L4Y5;I3L460;C9IZD3	Q68EM7	Rho GTPase-activating protein 17	ARHGAP17
25.7118	27.2503	26.0729	25.646	26.6469	26.5039			0.0486254	1	0.0794023	0.141823	0	Q6DKI1;R4GMU7	Q6DKI1;R4GMU7	60S ribosomal protein L7-like 1	RPL7L1
26.3832	26.7868	25.2745	26.6484	26.4045	26.6882			0.396547	1	-0.432227	-0.938144	0	Q6DKK2;K7ERR1;K7EKH7;K7EJA1	Q6DKK2	Tetratricopeptide repeat protein 19, mitochondrial	TTC19
26.9619	27.436	24.9483	26.7822	26.7576	27.0331			0.205873	1	-0.408891	-0.532663	0	Q6DT37	Q6DT37	Serine/threonine-protein kinase MRCK gamma	CDC42BPG
27.2148	26.8621	27.6977	27.098	27.9568	27.8913			0.459063	0.99771	-0.39054	-1.06353	0	Q6FI81;H3BV90;H3BT65;H3BUG4;H3BPG7;H3BQ23;H3BTZ8	Q6FI81;H3BV90;H3BT65;H3BUG4	Anamorsin	CIAPIN1
28.1536	28.5349	27.8243	27.9838	28.2963	28.1373			0.0486268	1	0.0318063	0.141827	0	Q6IAA8;F5GX19;F5H3Y3;H0YFI1;F5H479	Q6IAA8;F5GX19;F5H3Y3;H0YFI1;F5H479	Ragulator complex protein LAMTOR1	LAMTOR1
29.3709	29.7774	26.7208	29.7068	29.956	29.4501			0.485239	0.961321	-1.08128	-1.11542	0	Q6IBS0;A0A7I2V2U8;A0A7I2V5D3;A0A7I2V5B1;D6RG15;H0Y858;A0A7I2YQM6;A0A7I2V3T5;H7C5I2	Q6IBS0;A0A7I2V2U8;A0A7I2V5D3;A0A7I2V5B1;D6RG15	Twinfilin-2	TWF2
26.6196	27.0411	25.7279	25.9849	26.6037	26.4485			0.0977349	1	0.117167	0.272841	0	Q6IN85;G3V5Z3;H0YIY8;G3V5A2;H0YJN6;Q5MIZ7;G3V4R3;G3V231	Q6IN85;G3V5Z3;H0YIY8	Serine/threonine-protein phosphatase 4 regulatory subunit 3A	SMEK1
26.3478	27.1746	25.7074	26.3754	26.3422	26.6192			0.027615	1	-0.0356636	-0.0822578	0	Q6NUK1;A0A3B3IU96;J3KN42;H3BMI3	Q6NUK1	Calcium-binding mitochondrial carrier protein SCaMC-1	SLC25A24
26.6444	26.9409	25.7806	26.9801	26.5812	26.7827			0.372542	1	-0.326013	-0.889303	0	Q6NXE6;B4E1N1;F5GWV0;F5H4P3;F5H2X2;F5H2K4;F5H3X1;F5H052;H0YGQ5;H0YH65;F5H6J3;F5GZP0;H0YGL0	Q6NXE6;B4E1N1;F5GWV0;F5H4P3	Armadillo repeat-containing protein 6	ARMC6
27.1121	27.6355	25.5814	26.81	26.854	26.8747			0.0384826	1	-0.069898	-0.113365	0	Q6P179;D6RGW0;H0Y9X9	Q6P179;D6RGW0	Endoplasmic reticulum aminopeptidase 2	ERAP2
26.8641	26.9429	26.3742	27.0179	26.9287	27.1154			0.722721	0.570632	-0.293577	-1.57956	0	Q6P1N0;A0A7P0Z4M5;K7EMP1;K7EJY5	Q6P1N0	Coiled-coil and C2 domain-containing protein 1A	CC2D1A
28.2932	29.0057	26.2841	28.0642	28.5174	28.3973			0.219446	1	-0.46529	-0.563268	0	Q6P2E9;I3L3M2;I3L2F4;I3L0V0	Q6P2E9	Enhancer of mRNA-decapping protein 4	EDC4
29.272	29.8079	28.4874	29.3703	29.526	29.3495			0.228569	1	-0.226145	-0.583641	0	Q6P2Q9;I3L0J9;I3L3Z8;I3L1T8	Q6P2Q9	Pre-mRNA-processing-splicing factor 8	PRPF8
26.6031	27.1972	24.987	26.0813	26.499	26.1389			0.0111374	1	0.0227318	0.0337664	0	Q6P6C2	Q6P6C2	RNA demethylase ALKBH5	ALKBH5
28.3663	28.3596	26.6132	27.6504	27.6173	27.7414			0.0655597	1	0.109992	0.188196	0	Q6PD62;H0YCE8	Q6PD62	RNA polymerase-associated protein CTR9 homolog	CTR9
27.4972	27.9648	26.7922	27.6008	27.399	27.55			0.102355	1	-0.0985406	-0.284661	0	Q6PGP7;D6RCE2	Q6PGP7	Tetratricopeptide repeat protein 37	TTC37
28.5157	27.6504	27.2576	27.3909	27.9457	28.2539			0.0421335	1	-0.0555623	-0.123671	0	Q6PI48;A0A3B3ISK7;A0A3B3IT01;A0A3B3IS01;A0A3B3ITK9;A0A3B3ITS3;A0A3B3IS54	Q6PI48;A0A3B3ISK7;A0A3B3IT01;A0A3B3IS01;A0A3B3ITK9;A0A3B3ITS3	Aspartate--tRNA ligase, mitochondrial	DARS2
27.2051	27.792	24.3986	26.6193	27.0862	27.6528			0.236295	1	-0.654196	-0.600779	0	Q6PJG6	Q6PJG6	BRCA1-associated ATM activator 1	BRAT1
27.0148	27.0209	26.5583	27.1178	27.1688	27.6359			0.919121	0.373014	-0.442851	-1.96782	0	Q6PJT7;G3V256;A0A3B3IT62;G3V411;G3V3R9;G3V3Y4;G3V240;G3V572;G3V2X4;G3V473	Q6PJT7;G3V256	Zinc finger CCCH domain-containing protein 14	ZC3H14
28.0367	28.4379	27.2432	28.0842	28.2859	27.8909			0.187477	1	-0.181071	-0.490584	0	Q6PKG0;A0A0B4J210;E5RH50;H0YC33;A0A3B3ISF0;Q659C4;H0YAN4;H0YC73;H0YBW1;H0YBR8;H0YAX9;E5RHK4;H0YBM7	Q6PKG0;A0A0B4J210	La-related protein 1	LARP1
25.1309	27.0639	24.6977	26.9419	26.8395	26.5786			0.718726	0.576858	-1.15582	-1.57176	0	Q6PL24	Q6PL24	Protein TMED8	TMED8
28.0272	28.8919	27.0219	27.9083	28.3356	28.4618			0.170286	1	-0.254891	-0.450578	0	Q6UN15;A0A0B4J203	Q6UN15;A0A0B4J203	Pre-mRNA 3-end-processing factor FIP1	FIP1L1
29.084	28.6413	25.257	28.8577	28.3024	28.1054			0.244585	1	-0.761098	-0.619053	0	Q6UXN9	Q6UXN9	WD repeat-containing protein 82	WDR82
26.9122	26.978	26.852	26.8501	26.648	27.1143			0.112178	1	0.0432784	0.309541	0	Q6WKZ4;E7EX40;Q7L804	Q6WKZ4;E7EX40	Rab11 family-interacting protein 1	RAB11FIP1
28.4311	29.0746	27.4519	28.1327	28.4862	28.901			0.132306	1	-0.187454	-0.359519	0	Q6XQN6;G5E977;C9J8U2;H0YF31;A0A087WUT5	Q6XQN6;G5E977;C9J8U2	Nicotinate phosphoribosyltransferase	NAPRT
26.8867	27.1289	26.0985	26.4736	27.0217	27.2192			0.201564	1	-0.200127	-0.522871	0	Q6Y7W6;I1E4Y6;E7ESB6;C9JHW1;A0A7I2V3H7;A0A7I2V361;A0A7I2V3H0;A0A7I2V516;F8WCD5;C9JPV7;C9JXQ0;C9J0V6;C9JHT0;C9JRZ2;C9JW88	Q6Y7W6;I1E4Y6;E7ESB6;C9JHW1;A0A7I2V3H7;A0A7I2V361;A0A7I2V3H0;A0A7I2V516	PERQ amino acid-rich with GYF domain-containing protein 2	GIGYF2
28.7078	29.2335	28.511	28.8243	29.1036	29.1383			0.359106	1	-0.204622	-0.861762	0	Q6YN16	Q6YN16	Hydroxysteroid dehydrogenase-like protein 2	HSDL2
27.8458	28.3756	26.8242	27.9269	28.1989	28.4901			0.468676	0.985409	-0.523404	-1.08262	0	Q6YP21;A0A0A0MRN7	Q6YP21	Kynurenine--oxoglutarate transaminase 3	CCBL2
25.9321	28.7775	25.5188	27.593	27.5303	27.3904			0.301828	1	-0.76174	-0.742386	0	Q6ZT12;H0Y3K2;H7C481	Q6ZT12	E3 ubiquitin-protein ligase UBR3	UBR3
27.1725	27.4155	25.6137	27.7218	27.5453	27.8843			0.792475	0.486556	-0.983228	-1.71623	0	Q6ZT62;Q9Y3L3;A0A2R8Y5V0;A0A3B3IU28	Q6ZT62;Q9Y3L3	SH3 domain-binding protein 1	SH3BP1
26.2858	25.5845	25.1982	26.109	26.4452	26.3671			0.85939	0.41567	-0.617627	-1.84848	0	Q6ZVM7;F5H3S6;B7Z2U2;K7ENB0	Q6ZVM7;F5H3S6;B7Z2U2	TOM1-like protein 2	TOM1L2
27.432	27.813	26.5138	27.2962	27.1691	27.2234			0.0200669	1	0.023337	0.0602514	0	Q7KZ85	Q7KZ85	Transcription elongation factor SPT6	SUPT6H
29.3945	29.5576	28.8956	29.6744	29.9289	29.9063			1.21007	0.230523	-0.553907	-2.57504	0	Q7KZF4;H7C597	Q7KZF4	Staphylococcal nuclease domain-containing protein 1	SND1
27.6519	27.9745	24.5604	27.5868	27.9242	27.5574			0.366798	1	-0.960571	-0.877548	0	Q7L0Y3;C9JVB6	Q7L0Y3;C9JVB6	Mitochondrial ribonuclease P protein 1	TRMT10C
28.6193	28.4016	28.5976	28.6061	28.6024	29.6089			0.512212	0.94159	-0.39963	-1.1686	0	Q7L1Q6;C9IZ80;C9JFN4;C9JV57;H0Y503;C9J188;C9JWF5	Q7L1Q6;C9IZ80	Basic leucine zipper and W2 domain-containing protein 1	BZW1
27.9663	28.8917	25.9928	28.4109	28.331	28.1417			0.324096	1	-0.677624	-0.789209	0	Q7L266;A0A087WUG3;A0A087WZI5;E9PJK6	Q7L266	Isoaspartyl peptidase/L-asparaginase;Isoaspartyl peptidase/L-asparaginase alpha chain;Isoaspartyl peptidase/L-asparaginase beta chain	ASRGL1
29.2773	29.9671	26.0167	28.8571	29.0583	28.8462			0.153139	1	-0.50021	-0.409952	0	Q7L2H7;J3KNJ2;H0YCQ8;E9PN86;E9PRY0	Q7L2H7;J3KNJ2;H0YCQ8	Eukaryotic translation initiation factor 3 subunit M	EIF3M
29.2895	29.2198	28.2169	29.0045	29.0708	29.2888			0.233981	1	-0.212648	-0.595657	0	Q7L576;A0A0G2JR96;A0A0G2JQT1;H0YL50;A0A0G2JRX2;A0A087WU52;A0A0G2JRV9;A0A087WWL1;A0A087WV63;A0A0G2JRF5;A0A087WWY5	Q7L576;A0A0G2JR96;A0A0G2JQT1	Cytoplasmic FMR1-interacting protein 1	CYFIP1
26.6442	27.1092	25.1692	27.4538	27.1207	27.2477			0.748803	0.526953	-0.966556	-1.63055	0	Q7L5N7;H3BU68	Q7L5N7	Lysophosphatidylcholine acyltransferase 2	LPCAT2
26.7704	27.1614	25.0035	26.4941	26.9674	26.5104			0.194551	1	-0.345513	-0.506849	0	Q7LBC6;H0Y9V5	Q7LBC6	Lysine-specific demethylase 3B	KDM3B
27.5276	27.0022	24.9854	27.5637	27.6107	27.0585			0.497631	0.958138	-0.905886	-1.13988	0	Q7RTV0	Q7RTV0	PHD finger-like domain-containing protein 5A	PHF5A
27.5866	27.66	25.8974	27.114	27.1846	27.2081			0.0736057	1	-0.120904	-0.209767	0	Q7Z2W4;A0A7P0T8C6;C9J6P4;H7C5K1	Q7Z2W4;A0A7P0T8C6;C9J6P4	Zinc finger CCCH-type antiviral protein 1	ZC3HAV1
27.1906	27.9063	24.8055	26.898	26.8983	26.7913			0.086401	1	-0.22842	-0.243503	0	Q7Z2Z2	Q7Z2Z2	Elongation factor Tu GTP-binding domain-containing protein 1	EFTUD1
30.9626	32.0839	25.3108	31.7572	32.1144	32.2898			0.547427	0.896471	-2.60142	-1.2377	0	Q7Z3B4	Q7Z3B4	Nucleoporin p54	NUP54
25.3418	26.455	24.7637	24.5466	25.9187	25.6286			0.085	1	0.155549	0.239841	0	Q7Z3E2;H0Y7V5	Q7Z3E2;H0Y7V5	Coiled-coil domain-containing protein 186	CCDC186
26.4483	27.5478	24.9603	27.2621	27.0661	26.6645			0.368711	1	-0.678798	-0.881467	0	Q7Z3J2;E7EWW0;F5H7K1;C9J7I2;H3BV68;H3BVG8;I3L1U5;H3BNX2;H0YFG6;H3BTI5;F6S1J4	Q7Z3J2;E7EWW0;F5H7K1;C9J7I2;H3BV68;H3BVG8	UPF0505 protein C16orf62	C16orf62
28.9223	29.3891	28.1519	29.0856	29.0788	29.1596			0.326058	1	-0.286886	-0.793308	0	Q7Z406;A0A0C4DFM8;A1L2Z2;A0A2R8Y4C3;A0A2R8Y454	Q7Z406	Myosin-14	MYH14
26.5345	27.4338	27.6711	26.9284	26.4265	27.179			0.376334	1	0.368527	0.89705	0	Q7Z417	Q7Z417	Nuclear fragile X mental retardation-interacting protein 2	NUFIP2
27.7347	28.6595	27.2924	27.6552	27.7016	27.7908			0.167426	1	0.179633	0.443854	0	Q7Z434	Q7Z434	Mitochondrial antiviral-signaling protein	MAVS
27.4791	28.0172	24.8603	27.5054	27.4842	27.5113			0.297384	1	-0.714719	-0.73297	0	Q7Z4H3;V9GYS5;V9GZ04	Q7Z4H3;V9GYS5;V9GZ04	HD domain-containing protein 2	HDDC2
27.8873	27.9868	27.1561	28.2383	27.9331	27.8459			0.499695	0.957413	-0.329028	-1.14395	0	Q7Z4V5;M0R0J3;Q9Y3E1;H3BPQ6;A0A087WX58;A0A087WZ99;K7EPS6	Q7Z4V5;M0R0J3	Hepatoma-derived growth factor-related protein 2	HDGFRP2
28.1167	27.5871	27.0576	28.1212	28.3922	28.6184			1.09976	0.27079	-0.79018	-2.33887	0	Q7Z4W1;J3KS22;J3QS36;J3QL34;J3KRZ4;J3KSZ5;J3QS45;J3QRQ2	Q7Z4W1;J3KS22;J3QS36;J3QL34;J3KRZ4;J3KSZ5	L-xylulose reductase	DCXR
26.1502	27.3437	24.7694	26.1783	26.6927	26.452			0.176771	1	-0.353269	-0.46575	0	Q7Z5K2;F6QZY1	Q7Z5K2;F6QZY1	Wings apart-like protein homolog	WAPAL
28.6588	29.0479	27.9064	28.7122	28.7988	28.8522			0.301025	1	-0.249988	-0.740687	0	Q7Z5L9	Q7Z5L9	Interferon regulatory factor 2-binding protein 2	IRF2BP2
28.6378	29.2775	28.0592	28.6444	28.6359	28.6716			0.00700746	1	0.00751305	0.0213431	0	Q7Z6Z7;H0Y659;A0A087X146;A0A1B0GXC7	Q7Z6Z7	E3 ubiquitin-protein ligase HUWE1	HUWE1
27.5694	27.1797	27.069	27.6946	27.4926	28.0789			0.986599	0.328155	-0.482655	-2.10445	0	Q7Z739;A0A024R7W5;A0A087X0Q1;A0A087WY31;S4R373	Q7Z739;A0A024R7W5;A0A087X0Q1;A0A087WY31	YTH domain-containing family protein 3	YTHDF3
26.6048	26.994	25.5907	26.502	26.4856	26.4412			0.0664315	1	-0.0797755	-0.190547	0	Q7Z7H8	Q7Z7H8	39S ribosomal protein L10, mitochondrial	MRPL10
26.5437	27.0412	24.3657	26.7655	26.7816	27.0558			0.461831	0.997873	-0.884051	-1.06903	0	Q86SF2;H0YAK0;E9PBY3;H0YAH3	Q86SF2	N-acetylgalactosaminyltransferase 7	GALNT7
29.0367	29.3758	28.2801	28.5825	29.0965	29.2518			0.0729328	1	-0.0794061	-0.207973	0	Q86U42;A0A7I2V383;B4DEH8;G3V4T2;H0YJH9	Q86U42;A0A7I2V383;B4DEH8;G3V4T2	Polyadenylate-binding protein 2	PABPN1
26.6568	26.1227	26.4279	27.6391	27.5058	26.6417			1.15905	0.24537	-0.859771	-2.46478	0	Q86UE4;E5RJU9;H0YBJ8	Q86UE4;E5RJU9	Protein LYRIC	MTDH
28.3011	28.4689	28.3922	28.504	28.6606	28.9588			1.06096	0.296589	-0.320396	-2.25766	0	Q86UP2;G3V4Y7;B7Z6P3;G3V5P0;G3V5G2;H0YJV5;H0YJZ8;H0YJP2	Q86UP2	Kinectin	KTN1
26.8141	27.0832	25.7769	27.1081	27.1892	27.2521			0.713257	0.583793	-0.625069	-1.56108	0	Q86V21;E7EW25	Q86V21	Acetoacetyl-CoA synthetase	AACS
29.1403	30.0413	26.6273	29.9293	29.9057	30.3344			0.635688	0.739642	-1.45352	-1.40992	0	Q86V81;E9PB61	Q86V81;E9PB61	THO complex subunit 4	ALYREF
26.7745	27.5506	25.1142	27.129	27.1549	26.752			0.29537	1	-0.532169	-0.728695	0	Q86VN1;A0A3B3ISW7	Q86VN1;A0A3B3ISW7	Vacuolar protein-sorting-associated protein 36	VPS36
30.5541	31.233	29.7926	30.8554	30.8009	30.6383			0.220644	1	-0.238324	-0.565953	0	Q86VP6;A0A0C4DGH5;H0YH27;F5H6I6;A0A3B3ISC4;F8WBB8	Q86VP6;A0A0C4DGH5	Cullin-associated NEDD8-dissociated protein 1	CAND1
29.5955	30.3902	27.8926	29.7206	29.822	29.5981			0.221994	1	-0.420791	-0.568973	0	Q86X55;K7EQA8;K7EK20;K7EPK1;K7EQB9	Q86X55;K7EQA8	Histone-arginine methyltransferase CARM1	CARM1
28.3714	28.8599	26.4284	28.346	28.127	28.3886			0.207463	1	-0.400595	-0.536267	0	Q86XP3;A0A0A0MSJ0;J3KRE3;J3QRI2;J3KTK9	Q86XP3;A0A0A0MSJ0	ATP-dependent RNA helicase DDX42	DDX42
27.971	28.6028	25.4111	27.8384	27.5733	28.1955			0.211309	1	-0.540772	-0.544963	0	Q86Y56;H0Y650;E9PGY2;H7C3B1	Q86Y56;H0Y650	Dynein assembly factor 5, axonemal	DNAAF5
26.9295	26.9459	23.8802	26.4751	26.4088	26.1862			0.160855	1	-0.438145	-0.428326	0	Q86YH6;Q5JRD6	Q86YH6	Decaprenyl-diphosphate synthase subunit 2	PDSS2
27.1039	27.4362	25.7473	26.8633	26.5743	26.9071			0.0119703	1	-0.0191085	-0.0362583	0	Q86YP4;C9JVY3;V9GY85;H7C3H1;C9JMI3;C9JGN4;C9JJK9;V9GYX5	Q86YP4	Transcriptional repressor p66-alpha	GATAD2A
27.7484	27.712	25.9095	27.248	27.5498	27.6705			0.23173	1	-0.366119	-0.590666	0	Q8IV08;M0R3G9;M0R1F7	Q8IV08	Phospholipase D3	PLD3
27.0283	27.9683	26.9865	27.4946	27.6632	27.1674			0.117901	1	-0.114012	-0.323884	0	Q8IV36;E9PIM7;J3KSF1;X6R4D2;E9PMS4	Q8IV36	Protein HID1	HID1
24.9698	26.9339	25.1636	26.4753	26.6225	27.1026			0.732909	0.552779	-1.04442	-1.59947	0	Q8IV56;C9JQ22	Q8IV56	Proline-rich protein 15	PRR15
27.196	26.7351	25.8546	27.0719	26.6063	26.9958			0.28498	1	-0.29612	-0.70656	0	Q8IVS2	Q8IVS2	Malonyl-CoA-acyl carrier protein transacylase, mitochondrial	MCAT
30.0111	30.1546	29.6476	30.0177	29.9304	29.9333			0.0508109	1	-0.0227102	-0.147885	0	Q8IVT2	Q8IVT2	Mitotic interactor and substrate of PLK1	MISP
26.4465	27.2366	25.6132	26.8334	26.5549	27.7631			0.447545	1	-0.618332	-1.04059	0	Q8IWA0	Q8IWA0	WD repeat-containing protein 75	WDR75
27.5422	27.7563	26.4117	27.1711	27.631	27.001			0.0225864	1	-0.0309499	-0.0676348	0	Q8IWB7;C9JJ54;A0A494C0A6	Q8IWB7;C9JJ54	WD repeat and FYVE domain-containing protein 1	WDFY1
28.0588	28.5156	27.5861	28.6736	28.4993	28.0916			0.504633	0.950448	-0.367989	-1.15368	0	Q8IWE2	Q8IWE2	Protein NOXP20	FAM114A1
26.478	27.5156	26.1234	27.1623	27.0023	27.8969			0.576979	0.83678	-0.648144	-1.29547	0	Q8IWJ2;B8ZZW2;H7BYJ9;B8ZZA5;U3KQE0;U3KPU4	Q8IWJ2	GRIP and coiled-coil domain-containing protein 2	GCC2
26.8693	27.0105	25.1951	26.4603	25.9035	26.4828			0.0422943	1	0.0760905	0.124123	0	Q8IWV8	Q8IWV8	E3 ubiquitin-protein ligase UBR2	UBR2
27.1629	26.9226	28.3629	27.1631	27.6072	28.0901			0.094396	1	-0.137333	-0.264249	0	Q8IWX8;J3QK89	Q8IWX8;J3QK89	Calcium homeostasis endoplasmic reticulum protein	CHERP
25.9757	26.8762	24.348	26.7217	26.4988	26.1716			0.410068	1	-0.730733	-0.965466	0	Q8IWZ3;E9PDP5;H7C2F5;H3BLS9;D6RHC4;H0Y785;H0Y472;H0Y4P6;H7C0V5;A0A0A0MQZ8;H0Y7Y3	Q8IWZ3;E9PDP5;H7C2F5;H3BLS9	Ankyrin repeat and KH domain-containing protein 1	ANKHD1
28.823	29.5552	28.2402	28.8412	28.5954	28.829			0.10939	1	0.117593	0.302514	0	Q8IX12;A0A0C4DGG8;F5H2E6;F5H3E1;F5H1H2;F5H7M9;F5H1L3;F5H3I8;H0YFJ7	Q8IX12;A0A0C4DGG8;F5H2E6;F5H3E1;F5H1H2	Cell division cycle and apoptosis regulator protein 1	CCAR1
27.3194	27.4767	25.666	27.7253	27.34	26.8484			0.312688	1	-0.48389	-0.765292	0	Q8IXI1;H3BST5;I3L2C6;H3BUX4;H3BU27;H3BMP9;H3BVI5	Q8IXI1;H3BST5;I3L2C6	Mitochondrial Rho GTPase 2	RHOT2
28.5282	28.3747	26.8289	28.1985	27.8755	27.7863			0.0257801	1	-0.042848	-0.0769393	0	Q8IY81	Q8IY81	pre-rRNA processing protein FTSJ3	FTSJ3
27.164	27.359	26.4169	26.7661	26.18	25.1057			0.786752	0.493849	0.962666	1.70498	0	Q8IYB8;B1AR60	Q8IYB8	ATP-dependent RNA helicase SUPV3L1, mitochondrial	SUPV3L1
30.5735	31.392	25.387	30.6606	30.0629	30.314			0.258993	1	-1.22832	-0.650545	0	Q8IYD1	Q8IYD1	Eukaryotic peptide chain release factor GTP-binding subunit ERF3B	GSPT2
27.8267	28.432	26.0442	27.7505	27.6883	28.0031			0.202514	1	-0.379663	-0.525034	0	Q8IZL8;C9JFV4;E7EV54;I3L445;I3L1P4;I3L4M7;I3L4P1	Q8IZL8;C9JFV4;E7EV54	Proline-, glutamic acid- and leucine-rich protein 1	PELP1
26.7749	27.4978	25.5334	26.4906	27.2843	26.9006			0.178216	1	-0.289771	-0.469116	0	Q8IZW8	Q8IZW8	Tensin-4	TNS4
26.4342	26.1679	25.4093	28.9363	30.4212	30.2861	+	3ha_huvec	2.62749	0.0062	-3.87744	-6.86507	0	Q8N0X4;Q5JVC2;Q5JVC0;Q5JVC1;Q5JVB9	Q8N0X4	Citrate lyase subunit beta-like protein, mitochondrial	CLYBL
25.7888	26.0302	24.467	26.1255	26.4159	26.2684			0.787473	0.492797	-0.841321	-1.7064	0	Q8N122	Q8N122	Regulatory-associated protein of mTOR	RPTOR
29.3187	29.8844	28.7664	29.6033	29.5868	29.7552			0.424352	1	-0.325293	-0.994199	0	Q8N163;H0YB24;G3V119;E5RHJ4;E5RFJ3;H0YC69;E5RGU7;H0YC58;A0A087X2B6;E5RHH8	Q8N163;H0YB24;G3V119	Cell cycle and apoptosis regulator protein 2	CCAR2
28.7097	29.0698	27.9193	28.7759	28.7797	28.842			0.274563	1	-0.232935	-0.684223	0	Q8N1F7;H3BVG0;H3BRI8;H3BP95;H3BM93;H3BMX0;H3BNN5;H3BV11;H3BPA9;H3BVE2;H3BRD9;H3BV15;H3BNG7	Q8N1F7;H3BVG0	Nuclear pore complex protein Nup93	NUP93
29.614	29.8676	28.0917	29.4421	29.6013	29.6486			0.267118	1	-0.372883	-0.668165	0	Q8N1G4	Q8N1G4	Leucine-rich repeat-containing protein 47	LRRC47
26.2706	26.3516	25.1307	26.6141	25.7907	26.961			0.439104	1	-0.537643	-1.02374	0	Q8N201;H7C582	Q8N201	Integrator complex subunit 1	INTS1
26.3953	26.2068	25.6593	26.5092	26.1567	25.9443			0.158293	1	-0.116302	-0.422242	0	Q8N2F6;A0A0J9YWR7;A0A0J9YXE4;C9J5N7;A0A0J9YXV5;H7C2M7;H7BXQ8;A0A0J9YY38	Q8N2F6;A0A0J9YWR7;A0A0J9YXE4;C9J5N7;A0A0J9YXV5;H7C2M7;H7BXQ8	Armadillo repeat-containing protein 10	ARMC10
26.4881	25.5459	25.8622	26.6694	26.4416	26.6014			0.996473	0.322924	-0.605412	-2.12463	0	Q8N335;C9JM46;C9JFA7	Q8N335;C9JM46	Glycerol-3-phosphate dehydrogenase 1-like protein;Glycerol-3-phosphate dehydrogenase [NAD(+)]	GPD1L
26.5328	26.9722	25.8307	27.0689	27.0075	27.5518			0.955552	0.354784	-0.764175	-2.04133	0	Q8N392	Q8N392	Rho GTPase-activating protein 18	ARHGAP18
28.7209	28.9979	27.1678	29.324	29.1819	28.4131			0.460008	0.996662	-0.677511	-1.06541	0	Q8N3U4;B1AMT4;B1AMT1;B1AMT2;B1AMT3	Q8N3U4	Cohesin subunit SA-2	STAG2
26.4621	27.3124	24.2432	26.3864	26.2963	26.655			0.181886	1	-0.440012	-0.477648	0	Q8N3X1	Q8N3X1	Formin-binding protein 4	FNBP4
26.91	27.4112	25.4591	26.2464	26.3065	26.9061			0.0596401	1	0.107082	0.17214	0	Q8N5N7	Q8N5N7	39S ribosomal protein L50, mitochondrial	MRPL50
27.3	27.4176	25.1067	27.1538	27.3646	27.4167			0.393015	1	-0.703611	-0.930985	0	Q8N684;F5H669;F5H6M0;F5H047;J3QT54;C9J286;C9J323;F5H5B7;F5H1W4;F5H2K8;F5H6P5;F5H6A8;F5GXA3;C9JM38	Q8N684;F5H669	Cleavage and polyadenylation specificity factor subunit 7	CPSF7
27.1716	27.9027	24.7596	27.1317	27.0902	26.8212			0.158295	1	-0.403063	-0.422246	0	Q8N6R0	Q8N6R0	Methyltransferase-like protein 13	METTL13
28.1494	28.6449	28.1907	29.0598	28.9446	27.6371			0.171278	1	-0.218788	-0.452905	0	Q8N766;H7C4E3	Q8N766	ER membrane protein complex subunit 1	EMC1
27.9761	28.7174	27.2695	27.2619	27.7167	28.0405			0.264407	1	0.314663	0.662296	0	Q8N7H5;B4DGJ5	Q8N7H5;B4DGJ5	RNA polymerase II-associated factor 1 homolog	PAF1
27.6339	27.8606	25.3749	27.726	27.7206	27.8334			0.433038	1	-0.803561	-1.01161	0	Q8NB37;H0YER3;H0YE25;H0YF25;E9PLI5;E9PQD8	Q8NB37;H0YER3;H0YE25;H0YF25	Parkinson disease 7 domain-containing protein 1	PDDC1
28.0236	28.7678	26.7651	28.0599	28.5776	28.3468			0.323901	1	-0.475905	-0.788802	0	Q8NBF2	Q8NBF2	NHL repeat-containing protein 2	NHLRC2
25.137	25.6276	25.148	27.6366	27.3995	27.5094	+	3ha_huvec	3.63974	0.0413333	-2.21093	-12.5881	0	Q8NBJ4;C9J941;F8WAT9;C9JYM4	Q8NBJ4	Golgi membrane protein 1	GOLM1
27.2152	28.4535	24.4062	27.485	27.6241	27.5995			0.297284	1	-0.877915	-0.732759	0	Q8NBJ5;M0QX72;M0QYH0	Q8NBJ5	Procollagen galactosyltransferase 1	COLGALT1
31.1	31.0305	29.1337	31.5514	31.4508	31.5292			0.778499	0.49579	-1.08905	-1.68877	0	Q8NBS9	Q8NBS9	Thioredoxin domain-containing protein 5	TXNDC5
25.0633	27.8291	24.8023	26.345	26.0979	26.1881			0.116909	1	-0.312099	-0.321406	0	Q8NBU5;A0A7P0T7Z9;A0A7P0T9B4;A0A7P0TAM5;A0A7P0T9U2;A0A7P0Z4J1	Q8NBU5	ATPase family AAA domain-containing protein 1	ATAD1
27.5471	28.2716	25.8398	27.3537	28.0141	27.3108			0.169958	1	-0.340033	-0.449807	0	Q8NBX0	Q8NBX0	Saccharopine dehydrogenase-like oxidoreductase	SCCPDH
30.6452	30.4295	28.3485	30.4246	30.7578	30.7266			0.487456	0.962359	-0.828569	-1.1198	0	Q8NC51	Q8NC51	Plasminogen activator inhibitor 1 RNA-binding protein	SERBP1
27.4449	28.3094	24.6434	26.906	27.2804	27.5733			0.150742	1	-0.453998	-0.404211	0	Q8NCF5	Q8NCF5	NFATC2-interacting protein	NFATC2IP
29.2894	30.0307	27.8468	29.0637	29.2273	28.8302			0.00766982	1	0.0152067	0.0233432	0	Q8NCW5;A0A7P0TAG8;A0A7P0T9Y2;Q5T3I4;A0A7P0Z426;Q5T3I3;A0A7P0TA18	Q8NCW5;A0A7P0TAG8;A0A7P0T9Y2;Q5T3I4;A0A7P0Z426	NAD(P)H-hydrate epimerase	APOA1BP
26.3384	26.9124	25.4969	26.4628	26.0605	26.2229			0.000380086	1	0.000498454	0.0011664	0	Q8NDH3;H0YEP3	Q8NDH3;H0YEP3	Probable aminopeptidase NPEPL1	NPEPL1
27.6646	26.1093	24.7136	27.999	27.9404	27.9919			0.99841	0.32216	-1.81461	-2.12859	0	Q8NDX5;E7EX82;H7C528;C9J6H0;H7C4H9;C9JYH7	Q8NDX5;E7EX82	Polyhomeotic-like protein 3	PHC3
27.5245	27.9686	26.841	27.8326	27.7463	27.4189			0.249439	1	-0.221233	-0.6297	0	Q8NE62;C9JYW4;C9J7D8	Q8NE62	Choline dehydrogenase, mitochondrial	CHDH
28.1412	29.1783	25.2049	27.7253	28.394	28.2195			0.192107	1	-0.604813	-0.501243	0	Q8NE86;S4R468	Q8NE86;S4R468	Calcium uniporter protein, mitochondrial	MCU
27.2435	27.6842	24.7857	27.5385	27.5978	27.877			0.534181	0.91671	-1.09997	-1.21175	0	Q8NEZ5;H3BTH6;H3BVA4;H3BUC1;H3BTR7;H3BRE0	Q8NEZ5;H3BTH6	F-box only protein 22	FBXO22
25.7139	26.856	24.8465	25.5541	25.6223	25.7635			0.0971659	1	0.158804	0.27138	0	Q8NF37;A0A0G2JQ62;A0A0G2JRI7	Q8NF37;A0A0G2JQ62;A0A0G2JRI7	Lysophosphatidylcholine acyltransferase 1	LPCAT1
26.8335	27.6038	25.8802	26.5646	26.9388	26.6806			0.0293287	1	0.044529	0.0872072	0	Q8NFH3;B4E301;F5H0E3;B4DVD1	Q8NFH3	Nucleoporin Nup43	NUP43
26.6591	27.0019	25.6616	26.427	26.3975	26.8684			0.103381	1	-0.123496	-0.287277	0	Q8NFH4;F8VTY2	Q8NFH4;F8VTY2	Nucleoporin Nup37	NUP37
27.0027	27.3576	26.3884	26.7672	27.2676	27.4799			0.292626	1	-0.255342	-0.722864	0	Q8NFH5;C9IYQ7;F8WCF5;F8WEL4;C9JIY9	Q8NFH5	Nucleoporin NUP53	NUP35
25.9483	26.5862	25.6534	26.8167	26.1839	26.876			0.72969	0.554563	-0.562875	-1.59317	0	Q8NFU3;R4GNF9	Q8NFU3;R4GNF9	Thiosulfate sulfurtransferase/rhodanese-like domain-containing protein 1	TSTD1
27.2845	28.1775	27.4009	26.8868	26.9459	27.3324			0.83855	0.430275	0.565926	1.80715	0	Q8NFV4;H0YC52;C9J7Q4;H7BZ58	Q8NFV4	Alpha/beta hydrolase domain-containing protein 11	ABHD11
27.4686	27.403	26.7436	27.1671	26.9657	27.0041			0.265801	1	0.159416	0.665316	0	Q8NFW8;F5H296;F5GYM0	Q8NFW8	N-acylneuraminate cytidylyltransferase	CMAS
29.5665	30.035	28.4158	30.1359	29.9524	29.971			0.633031	0.744045	-0.680698	-1.40474	0	Q8NI22;H7BZ18;A0A3B3IU18	Q8NI22;H7BZ18;A0A3B3IU18	Multiple coagulation factor deficiency protein 2	MCFD2
28.5511	28.6149	27.9839	28.5343	28.7182	28.6215			0.50949	0.946673	-0.241351	-1.16325	0	Q8NI60	Q8NI60	Atypical kinase ADCK3, mitochondrial	ADCK3
28.5176	28.9548	27.9143	28.7956	28.6619	28.991			0.486837	0.958943	-0.353921	-1.11857	0	Q8TAQ2;F8VXC8;F8VZW6	Q8TAQ2;F8VXC8	SWI/SNF complex subunit SMARCC2	SMARCC2
27.1534	27.6039	26.4325	27.5407	27.6495	27.7736			0.784559	0.491421	-0.591345	-1.70067	0	Q8TAT6;A0A0D9SFI9;I3L4U9;I3L3I1;I3L283	Q8TAT6	Nuclear protein localization protein 4 homolog	NPLOC4
26.7686	27.0651	25.0272	26.9096	26.5489	26.0812			0.121582	1	-0.226281	-0.333054	0	Q8TC07;C9JA93;F8WDJ1;F8WF35;F8VV61;F8WCB5	Q8TC07;C9JA93	TBC1 domain family member 15	TBC1D15
27.1496	27.3521	26.8573	26.7351	27.6572	27.5438			0.23316	1	-0.192351	-0.593838	0	Q8TC12;G3V2G6;G3V234;H0YIZ8;H0YJ46	Q8TC12;G3V2G6;G3V234;H0YIZ8;H0YJ46	Retinol dehydrogenase 11	RDH11
28.0847	28.4014	27.8902	28.1246	28.3498	28.0835			0.130508	1	-0.0605106	-0.355105	0	Q8TCS8;H7C3C5;H7BXF6	Q8TCS8	Polyribonucleotide nucleotidyltransferase 1, mitochondrial	PNPT1
27.8952	28.8643	25.5409	27.7378	27.4836	28.0493			0.117704	1	-0.323471	-0.323392	0	Q8TD30;H3BU54;P24298	Q8TD30	Alanine aminotransferase 2	GPT2
25.9995	25.8293	24.8955	25.5398	26.2618	26.0763			0.401289	1	-0.384533	-0.94774	0	Q8TDD1;F8VRX4;H0YHZ9;H0YHH7	Q8TDD1	ATP-dependent RNA helicase DDX54	DDX54
28.8919	29.4086	27.9992	28.5124	28.6031	28.6194			0.172574	1	0.188302	0.455943	0	Q8TDN6	Q8TDN6	Ribosome biogenesis protein BRX1 homolog	BRIX1
27.8353	28.3756	26.8008	27.9036	27.761	28.1454			0.217867	1	-0.266108	-0.559727	0	Q8TE67;A0A087X104	Q8TE67	Epidermal growth factor receptor kinase substrate 8-like protein 3	EPS8L3
27.0647	28.4028	26.8181	27.7103	27.3789	27.7253			0.128051	1	-0.176313	-0.349061	0	Q8TED0;H0Y8P4;D6RF65	Q8TED0;H0Y8P4;D6RF65	U3 small nucleolar RNA-associated protein 15 homolog	UTP15
25.671	26.9873	25.3577	26.8436	27.3448	27.2855			1.03365	0.31424	-1.15265	-2.20106	0	Q8TEM1	Q8TEM1	Nuclear pore membrane glycoprotein 210	NUP210
27.4749	28.0406	27.0491	27.623	27.6069	27.6652			0.141955	1	-0.110196	-0.383031	0	Q8TEQ6	Q8TEQ6	Gem-associated protein 5	GEMIN5
28.7405	29.5462	27.3163	28.4671	28.397	28.5271			0.0366466	1	0.0706266	0.108156	0	Q8TEX9;H0YN14;H0YMR4;H0YN07;H0YLV0;H0YL92;H0YK93;H0YKG5	Q8TEX9;H0YN14	Importin-4	IPO4
27.0978	27.5759	25.0991	26.9965	26.9587	27.0403			0.20779	1	-0.407567	-0.537007	0	Q8WTT2	Q8WTT2	Nucleolar complex protein 3 homolog	NOC3L
27.2181	28.0857	24.7786	27.2307	27.4811	27.3419			0.264266	1	-0.657099	-0.661991	0	Q8WTW3;A0A087WVI0;E9PBL8;J3QKY9;J3KRP4;J3QLT5;J3KSY3	Q8WTW3;A0A087WVI0;E9PBL8	Conserved oligomeric Golgi complex subunit 1	COG1
27.4208	28.2551	25.9282	27.8065	28.0359	28.1868			0.514135	0.941439	-0.808393	-1.17238	0	Q8WU90;H7C466;F8WB26	Q8WU90	Zinc finger CCCH domain-containing protein 15	ZC3H15
26.7621	27.414	26.8552	26.7856	27.4883	27.07			0.133106	1	-0.104201	-0.361477	0	Q8WUA4;A0A087WZD8;H0Y4Q6;H7C318;C9JNH7;H7C3X9	Q8WUA4;A0A087WZD8	General transcription factor 3C polypeptide 2	GTF3C2
26.4327	26.7192	25.0128	25.052	25.259	26.0581			0.417665	1	0.59854	0.980765	0	Q8WUF5	Q8WUF5	RelA-associated inhibitor	PPP1R13L
25.5865	26.1496	27.1301	27.6253	28.2151	27.7976			1.51892	0.141635	-1.59063	-3.28791	0	Q8WUH6	Q8WUH6	Transmembrane protein 263	TMEM263
27.3778	27.1741	27.0615	27.2286	27.4006	27.4592			0.615065	0.766145	-0.158322	-1.36974	0	Q8WUM0	Q8WUM0	Nuclear pore complex protein Nup133	NUP133
30.3389	30.4423	29.8117	30.6148	30.5527	30.7365			1.01227	0.316521	-0.437034	-2.15701	0	Q8WUM4;A0A3B3IT07;C9IZF9;F8WEQ7;F8WBR8;F8WDK9	Q8WUM4	Programmed cell death 6-interacting protein	PDCD6IP
27.8948	28.2037	24.4445	27.9004	28.0724	28.2817			0.438482	1	-1.23714	-1.0225	0	Q8WVJ2;E5RFP0	Q8WVJ2;E5RFP0	NudC domain-containing protein 2	NUDCD2
28.6665	29.1389	28.0061	28.8022	28.9716	28.9622			0.390142	1	-0.308159	-0.925155	0	Q8WVV4	Q8WVV4	Protein POF1B	POF1B
26.9964	27.452	26.7269	26.6547	27.4473	25.9291			0.321312	1	0.381372	0.783386	0	Q8WVY7	Q8WVY7	Ubiquitin-like domain-containing CTD phosphatase 1	UBLCP1
28.5922	28.7345	25.0133	28.7532	28.6318	28.6673			0.435243	1	-1.23742	-1.01602	0	Q8WW12	Q8WW12	PEST proteolytic signal-containing nuclear protein	PCNP
28.2629	27.356	25.0641	27.9587	27.3765	28.3206			0.427328	1	-0.990943	-1.00017	0	Q8WWC4;H7C0V0	Q8WWC4	Uncharacterized protein C2orf47, mitochondrial	C2orf47
28.3487	28.2448	27.5015	28.3991	28.4693	28.2928			0.583472	0.825974	-0.35538	-1.30814	0	Q8WWM7;H3BUF6;H3BSK9;H3BSQ5;H3BUE3;H3BRB0;A0A0C4DGL7	Q8WWM7;H3BUF6	Ataxin-2-like protein	ATXN2L
26.7216	27.6065	26.5529	26.3727	27.0607	26.2492			0.411031	1	0.399466	0.967408	0	Q8WXA9	Q8WXA9	Splicing regulatory glutamine/lysine-rich protein 1	SREK1
28.7452	29.3415	27.1363	28.8282	28.1854	29.3449			0.196853	1	-0.378487	-0.51212	0	Q8WXF1;X6RDA4	Q8WXF1;X6RDA4	Paraspeckle component 1	PSPC1
26.8994	27.7229	25.8875	26.9677	26.9266	26.9162			0.0657678	1	-0.100226	-0.188758	0	Q8WZ82	Q8WZ82	Ovarian cancer-associated gene 2 protein	OVCA2
26.8584	26.9887	25.4445	25.9172	26.3412	27.0042			0.00540641	1	0.00968297	0.0164963	0	Q8WZA9;M0QZP8	Q8WZA9	Immunity-related GTPase family Q protein	IRGQ
27.4608	27.9709	26.5336	27.2036	25.1901	25.3766			0.845598	0.419561	1.39834	1.82111	0	Q92466;A0A087X0X5;A0A087WYT8;A0A087WW71;A0A087WTQ7;A0A087WV56	Q92466;A0A087X0X5	DNA damage-binding protein 2	DDB2
26.9727	26.7849	24.9238	27.8491	27.6132	26.9528			0.815133	0.456009	-1.24456	-1.76087	0	Q92522	Q92522	Histone H1x	H1FX
26.6139	27.471	26.3902	26.9061	26.5488	26.4893			0.191445	1	0.176989	0.499722	0	Q92552;G5EA06;D6RH20;E5RJ73;D6RJC7	Q92552;G5EA06;D6RH20	28S ribosomal protein S27, mitochondrial	MRPS27
28.6918	29.0291	27.8581	28.8565	29.1027	29.4496			0.71843	0.576015	-0.609956	-1.57118	0	Q92597;A0A7I2ST14;E7ESM1;E5RJY1;E5RIR1;E5RGM5;E5RIV1;E5RIM2;A0A6Q8PHI0;A0A6Q8PF16;E5RI76;E5RK17;A0A6Q8PFR8;E5RG99	Q92597;A0A7I2ST14	Protein NDRG1	NDRG1
31.1835	31.7548	30.2945	31.6767	31.4466	31.7047			0.54298	0.89719	-0.531737	-1.22899	0	Q92598;A0A0A0MSM0;Q5TBM3;R4GN69	Q92598;A0A0A0MSM0	Heat shock protein 105 kDa	HSPH1
25.9985	27.354	25.0239	26.5677	27.1832	26.6922			0.418454	1	-0.688875	-0.982351	0	Q92609;C9J3F6;C9JDR8;C9K0P2;C9J397;C9JWX0;C9JW04;C9JNM0;C9JED7;F2Z3C3;C9JMP7;C9JIU4;F2Z3I5	Q92609;C9J3F6	TBC1 domain family member 5	TBC1D5
29.4338	29.8847	27.9131	29.5193	29.552	29.4899			0.301992	1	-0.443182	-0.742732	0	Q92616	Q92616	Translational activator GCN1	GCN1L1
27.2459	27.8014	25.2368	27.1137	26.5247	26.7339			0.0121618	1	-0.0293846	-0.0368307	0	Q92621;U3KPX2;U3KQ47;U3KQ97	Q92621	Nuclear pore complex protein Nup205	NUP205
27.0258	27.9772	26.0714	26.9787	26.814	26.888			0.0841797	1	0.131254	0.237694	0	Q92665	Q92665	28S ribosomal protein S31, mitochondrial	MRPS31
26.1318	26.2752	26.5372	25.9424	25.586	26.515			0.435246	1	0.300225	1.01603	0	Q92667;I3L2A2;I3L2N7;I3L3K1;I3L364;I3L0K6;I3L0W0;I3NI36	Q92667	A-kinase anchor protein 1, mitochondrial	AKAP1
30.221	29.6138	29.0818	30.0466	30.3074	30.4522			0.835169	0.43287	-0.62985	-1.80046	0	Q92688	Q92688	Acidic leucine-rich nuclear phosphoprotein 32 family member B	ANP32B
27.6521	27.7753	26.2768	27.1971	27.4318	27.6486			0.142394	1	-0.191151	-0.384094	0	Q92696;H0YLH3;H0YLG7;H0YKZ8;H0YMG5;H0YKP6	Q92696;H0YLH3	Geranylgeranyl transferase type-2 subunit alpha	RABGGTA
28.3682	28.7408	26.8299	28.0644	27.9757	28.4837			0.117177	1	-0.195002	-0.322076	0	Q92769;H3BM24;E5RFI6;E5RJ04;E5RGV4;E5RHE7;E5RH52;E5RG37;E5RFP9	Q92769	Histone deacetylase 2	HDAC2
28.8777	29.347	27.9294	29.083	28.7449	28.8583			0.154723	1	-0.177332	-0.413736	0	Q92783;A6NMU3;C9J1E5	Q92783;A6NMU3	Signal transducing adapter molecule 1	STAM
27.7971	28.3827	26.6827	27.2882	27.2932	27.5479			0.184208	1	0.244365	0.483028	0	Q92797;A0A087WUE9;M0R3C7;M0R033;M0R1C2;M0R180;M0QXP5	Q92797;A0A087WUE9;M0R3C7	Symplekin	SYMPK
28.0182	27.935	27.6953	27.7828	28.0752	27.747			0.0344823	1	0.0144857	0.101991	0	Q92878;A0A1W2PQ90;A0A494C1B7;A0A494BZX5;A0A494C122;A0A494C0Y7;E7ESD9;E7EN38;H7C0P8;A0A494BZX8;C9JNH8;E9PM98	Q92878;A0A1W2PQ90;A0A494C1B7;A0A494BZX5;A0A494C122	DNA repair protein RAD50	RAD50
28.0325	28.1444	27.0345	27.7498	28.0385	28.4129			0.339577	1	-0.32992	-0.821441	0	Q92890;C9J6N9;C9JNP9;C9IZG3	Q92890;C9J6N9;C9JNP9	Ubiquitin fusion degradation protein 1 homolog	UFD1L
27.6816	28.3419	26.8385	27.8522	27.9216	28.3922			0.392913	1	-0.434652	-0.930778	0	Q92896;H3BM42;H3BQU9;H3BQT1;H3BRD8	Q92896;H3BM42	Golgi apparatus protein 1	GLG1
29.2841	29.4674	28.2658	29.5407	29.4881	29.5732			0.635856	0.740692	-0.528236	-1.41024	0	Q92900	Q92900	Regulator of nonsense transcripts 1	UPF1
27.6331	28.2457	25.7915	27.6389	27.3791	27.855			0.206622	1	-0.400872	-0.534361	0	Q92905;E5RHH5;E5RHF2;E5RFS1;E5RG35;E5RK55	Q92905	COP9 signalosome complex subunit 5	COPS5
27.4246	28.1619	26.2002	27.4447	27.0385	26.8386			0.0922423	1	0.155009	0.258685	0	Q92917	Q92917	G patch domain and KOW motifs-containing protein	GPKOW
26.7387	26.8827	25.8642	26.7918	27.2483	26.9189			0.640413	0.733736	-0.491134	-1.41912	0	Q92947;K7EKT3;K7EQ99;K7ESA6;K7ES74;K7EKH1	Q92947	Glutaryl-CoA dehydrogenase, mitochondrial	GCDH
29.0142	29.4204	27.9328	28.8868	28.8502	28.9256			0.0779977	1	-0.0984186	-0.221423	0	Q92973;A0A7P0TBF0;A0A7P0Z4D3;A0A7P0T9C0;A0A7P0T944;E7EW37;S4R398;K7ENW1;K7ESC1	Q92973;A0A7P0TBF0;A0A7P0Z4D3;A0A7P0T9C0;A0A7P0T944	Transportin-1	TNPO1
27.8873	28.6078	27.1597	27.9568	28.1379	27.4767			0.0200432	1	0.0278187	0.0601818	0	Q92979;V9GYP5;A0A087WWQ2;A0A087WVM7	Q92979;V9GYP5;A0A087WWQ2;A0A087WVM7	Ribosomal RNA small subunit methyltransferase NEP1	EMG1
27.0274	27.8526	25.7712	27.439	27.3011	27.5715			0.381258	1	-0.553455	-0.90709	0	Q93008;O00507;H7C2M9	Q93008	Probable ubiquitin carboxyl-terminal hydrolase FAF-X	USP9X
28.778	29.1757	27.6864	29.158	29.2691	29.4981			0.768496	0.507182	-0.761689	-1.66914	0	Q93052;A0A087WZF1;C9JUT4;C9JXK9;C9J2R5;C9JIY7;C9JT42;C9J3U9;C9J1K7;C9J5C8;C9J4E3;C9JE51	Q93052;A0A087WZF1;C9JUT4	Lipoma-preferred partner	LPP
27.59	28.1612	27.8659	27.7443	27.3659	27.7007			0.589148	0.813026	0.268725	1.31922	0	Q93099;C9JTX9;H7C4R8;H7C576	Q93099	Homogentisate 1,2-dioxygenase	HGD
29.5788	29.2538	29.0657	29.9379	28.8235	29.0657			0.0213923	1	0.0237389	0.0641403	0	Q969H8;M0QYN0;M0QXF7	Q969H8;M0QYN0;M0QXF7	Myeloid-derived growth factor	MYDGF
27.5979	28.2317	24.7025	27.5814	27.9222	27.2702			0.271565	1	-0.747222	-0.677764	0	Q969S3	Q969S3	Zinc finger protein 622	ZNF622
27.7624	28.6023	28.5713	27.8072	28.5623	27.9147			0.235851	1	0.217279	0.599797	0	Q969Z0;C9J7P5;H7C4R5;C9IZN7;C9J5A2;C9J347	Q969Z0	Protein TBRG4	TBRG4
27.1969	27.1239	26.5972	28.443	27.9953	28.0305			2.12131	0.0533953	-1.18364	-4.98639	0	Q96A33;A0A087WYW6;J3QR89	Q96A33	Coiled-coil domain-containing protein 47	CCDC47
25.7297	26.3784	25.3927	27.7894	27.9809	28.0067	+	3ha_huvec	2.6678	0.00729412	-2.09207	-7.03736	0	Q96A49	Q96A49	Synapse-associated protein 1	SYAP1
26.1214	27.0153	25.0784	26.2394	26.6538	26.3212			0.227118	1	-0.333066	-0.580413	0	Q96A65	Q96A65	Exocyst complex component 4	EXOC4
26.8516	27.9596	25.3637	26.8742	26.7017	27.6193			0.158845	1	-0.340122	-0.423554	0	Q96AB3;K7ENV7;K7EKW4	Q96AB3;K7ENV7;K7EKW4	Isochorismatase domain-containing protein 2, mitochondrial	ISOC2
29.4566	29.5955	29.1154	29.7342	29.806	29.9973			1.31352	0.1895	-0.45665	-2.80461	0	Q96AE4;E9PEB5	Q96AE4;E9PEB5	Far upstream element-binding protein 1	FUBP1
29.3565	30.2521	26.0331	29.3514	29.711	29.5245			0.311338	1	-0.981707	-0.762454	0	Q96AG4;I3L223	Q96AG4	Leucine-rich repeat-containing protein 59	LRRC59
29.7702	30.0598	24.8014	29.2474	29.7064	29.2828			0.282627	1	-1.20168	-0.701527	0	Q96AT9;C9J6A7;C9J9T0;C9IZU8;F8WBT4;C9IYE8;E7ESZ6;C9J8S0;Q2QD12	Q96AT9;C9J6A7;C9J9T0;C9IZU8	Ribulose-phosphate 3-epimerase	RPE
27.7311	28.6053	25.8798	27.4475	26.9001	27.3858			0.0683862	1	0.160931	0.195806	0	Q96AY3;K7EM43;K7ELI6;K7ESG6;H0Y827	Q96AY3	Peptidyl-prolyl cis-trans isomerase FKBP10	FKBP10
26.2915	26.2923	24.2193	25.7896	26.794	26.6041			0.452662	1	-0.79487	-1.05079	0	Q96B36;M0R2V8;H9KV91	Q96B36	Proline-rich AKT1 substrate 1	AKT1S1
29.6278	30.0695	25.106	29.6663	29.5163	29.9559			0.38178	1	-1.44508	-0.908152	0	Q96BM9;A0A087X2J2	Q96BM9	ADP-ribosylation factor-like protein 8A	ARL8A
27.3145	27.5004	25.7965	26.9596	27.1119	27.1014			0.126548	1	-0.187148	-0.345354	0	Q96BP3;F5H7P7;D6R9Q1;D6RB19;D6RHV0;H0Y8N5;D6RA12;D6RDA4	Q96BP3;F5H7P7;D6R9Q1	Peptidylprolyl isomerase domain and WD repeat-containing protein 1	PPWD1
26.6893	26.18	24.436	27.0507	27.1378	27.1284			0.914457	0.375308	-1.33722	-1.95845	0	Q96BR5	Q96BR5	Cytochrome c oxidase assembly factor 7	COA7
[truncated: 478 more rows]

## Sheet: N265A_HA Vs. ITGA3_HA
Supplemental Table 3-2: The full list of proteins in N265A_HA Vs. ITGA3_HA identified by 2D-LC-MS/MS
[truncated: 2,498 more rows]
